# Supplementary material for: Systematically Differentiating Functions for Alternatively Spliced Isoforms through Integrating RNA-seq Data
Source: PLoS Comput Biol. 2013 Nov 7;9(11):e1003314. doi: 10.1371/journal.pcbi.1003314 (PMC3820534; doi:10.1371/journal.pcbi.1003314)
Supplement: Dataset S1 — Input RNA-seq dataset description. (XLSX) [file pcbi.1003314.s001.xlsx]

## Sheet: Sheet1
Run	ReleaseDate	spots	bases	avgLength	size_MB	AssemblyName	CenterName	download_path	Experiment	LibraryName	LibraryStrategy	LibrarySelection	LibrarySource	LibraryLayout	InsertSize	Platform	Model	SRAStudy	BioProject	Study_Pubmed_id	ProjectID	Sample	BioSample	TaxID	ScientificName	SampleName	Submission	Consent	INCLUDED
SRR038535	2011-08-30 13:04:31	14430590	519501240	36	550		unspecified	ftp://ftp-private.ncbi.nlm.nih.gov/sra/sra-instant/reads/ByRun/sra/SRR/SRR038/SRR038535/SRR038535.sra	SRX018091	Th1-WT [RNA-seq]	RNA-Seq	cDNA	TRANSCRIPTOMIC	SINGLE	0	ILLUMINA	Illumina Genome Analyzer II	SRP002148	GEO Series accession: GSE20898	0	124395	SRS025506		10090	Mus musculus	Mus musculus	SRA012281	public	YES
SRR038536	2011-08-30 13:04:31	11918978	429083208	36	454		unspecified	ftp://ftp-private.ncbi.nlm.nih.gov/sra/sra-instant/reads/ByRun/sra/SRR/SRR038/SRR038536/SRR038536.sra	SRX018092	Th1-Gata3-KO [RNA-seq]	RNA-Seq	cDNA	TRANSCRIPTOMIC	SINGLE	0	ILLUMINA	Illumina Genome Analyzer II	SRP002148	GEO Series accession: GSE20898	0	124395	SRS025507		10090	Mus musculus	Mus musculus	SRA012281	public	YES
SRR038537	2011-08-30 13:04:31	10741206	386683416	36	409			ftp://ftp-private.ncbi.nlm.nih.gov/sra/sra-instant/reads/ByRun/sra/SRR/SRR038/SRR038537/SRR038537.sra	SRX018093	Th2-WT [RNA-seq]	RNA-Seq	cDNA	TRANSCRIPTOMIC	SINGLE	0	ILLUMINA	Illumina Genome Analyzer II	SRP002148	GEO Series accession: GSE20898	0	124395	SRS025508		10090	Mus musculus	Mus musculus	SRA012281	public	YES
SRR038538	2011-08-30 13:04:31	9471480	340973280	36	361		unspecified	ftp://ftp-private.ncbi.nlm.nih.gov/sra/sra-instant/reads/ByRun/sra/SRR/SRR038/SRR038538/SRR038538.sra	SRX018094	Th2-Gata3-KO [RNA-seq]	RNA-Seq	cDNA	TRANSCRIPTOMIC	SINGLE	0	ILLUMINA	Illumina Genome Analyzer II	SRP002148	GEO Series accession: GSE20898	0	124395	SRS025509		10090	Mus musculus	Mus musculus	SRA012281	public	NO
SRR038539	2011-08-30 13:04:31	11588456	417184416	36	442		unspecified	ftp://ftp-private.ncbi.nlm.nih.gov/sra/sra-instant/reads/ByRun/sra/SRR/SRR038/SRR038539/SRR038539.sra	SRX018095	Th17-WT [RNA-seq]	RNA-Seq	cDNA	TRANSCRIPTOMIC	SINGLE	0	ILLUMINA	Illumina Genome Analyzer II	SRP002148	GEO Series accession: GSE20898	0	124395	SRS025510		10090	Mus musculus	Mus musculus	SRA012281	public	YES
SRR038540	2011-08-30 13:04:31	10967420	383859700	35	407		unspecified	ftp://ftp-private.ncbi.nlm.nih.gov/sra/sra-instant/reads/ByRun/sra/SRR/SRR038/SRR038540/SRR038540.sra	SRX018096	Th17-Gata3-KO [RNA-seq]	RNA-Seq	cDNA	TRANSCRIPTOMIC	SINGLE	0	ILLUMINA	Illumina Genome Analyzer II	SRP002148	GEO Series accession: GSE20898	0	124395	SRS025511		10090	Mus musculus	Mus musculus	SRA012281	public	YES
SRR038541	2011-08-30 13:04:31	9121814	319263490	35	339		unspecified	ftp://ftp-private.ncbi.nlm.nih.gov/sra/sra-instant/reads/ByRun/sra/SRR/SRR038/SRR038541/SRR038541.sra	SRX018097	iTreg-WT [RNA-seq]	RNA-Seq	cDNA	TRANSCRIPTOMIC	SINGLE	0	ILLUMINA	Illumina Genome Analyzer II	SRP002148	GEO Series accession: GSE20898	0	124395	SRS025512		10090	Mus musculus	Mus musculus	SRA012281	public	NO
SRR038542	2011-08-30 13:04:31	8356590	292480650	35	310		unspecified	ftp://ftp-private.ncbi.nlm.nih.gov/sra/sra-instant/reads/ByRun/sra/SRR/SRR038/SRR038542/SRR038542.sra	SRX018098	iTreg-Gata3-KO [RNA-seq]	RNA-Seq	cDNA	TRANSCRIPTOMIC	SINGLE	0	ILLUMINA	Illumina Genome Analyzer II	SRP002148	GEO Series accession: GSE20898	0	124395	SRS025513		10090	Mus musculus	Mus musculus	SRA012281	public	NO
SRR354075	2011-11-01 12:28:14	16823708	639300904	38	339		unspecified	ftp://ftp-private.ncbi.nlm.nih.gov/sra/sra-instant/reads/ByRun/sra/SRR/SRR354/SRR354075/SRR354075.sra	SRX101764	GSM818951: RNA-Seq PSA NCAM+ neurons, biol repl 1	RNA-Seq	cDNA	TRANSCRIPTOMIC	SINGLE	0	ILLUMINA	Illumina Genome Analyzer IIx	SRP009041	GEO Series accession: GSE33060	22085726	154421	SRS267516		10090		Mus musculus	SRA047260	public	YES
SRR354076	2011-11-01 12:28:14	13315799	506000362	38	270		unspecified	ftp://ftp-private.ncbi.nlm.nih.gov/sra/sra-instant/reads/ByRun/sra/SRR/SRR354/SRR354076/SRR354076.sra	SRX101765	GSM818952: RNA-Seq PSA NCAM+ neurons, biol repl 2	RNA-Seq	cDNA	TRANSCRIPTOMIC	SINGLE	0	ILLUMINA	Illumina Genome Analyzer IIx	SRP009041	GEO Series accession: GSE33060	22085726	154421	SRS267517		10090		Mus musculus	SRA047260	public	YES
SRR354077	2011-11-01 12:28:14	138439291	13982368391	101	9412		unspecified	ftp://ftp-private.ncbi.nlm.nih.gov/sra/sra-instant/reads/ByRun/sra/SRR/SRR354/SRR354077/SRR354077.sra	SRX101766	GSM818953: RNA-Seq Sox2/Sox3 siRNA in neural progenitor cells, after 24h	RNA-Seq	cDNA	TRANSCRIPTOMIC	SINGLE	0	ILLUMINA	Illumina Genome Analyzer IIx	SRP009041	GEO Series accession: GSE33060	22085726	154421	SRS267518		10090		Mus musculus	SRA047260	public	YES
SRR354078	2011-11-01 12:28:14	144166093	14560775393	101	9794		unspecified	ftp://ftp-private.ncbi.nlm.nih.gov/sra/sra-instant/reads/ByRun/sra/SRR/SRR354/SRR354078/SRR354078.sra	SRX101767	GSM818954: RNA-Seq Sox2/Sox3 siRNA in neural progenitor cells, after 48h	RNA-Seq	cDNA	TRANSCRIPTOMIC	SINGLE	0	ILLUMINA	Illumina Genome Analyzer IIx	SRP009041	GEO Series accession: GSE33060	22085726	154421	SRS267519		10090		Mus musculus	SRA047260	public	YES
SRR354079	2011-11-01 12:28:14	58475710	5906046710	101	3882		unspecified	ftp://ftp-private.ncbi.nlm.nih.gov/sra/sra-instant/reads/ByRun/sra/SRR/SRR354/SRR354079/SRR354079.sra	SRX101768	GSM818955: RNA-Seq Universal siRNA control in neural progenitor cells, after 48h	RNA-Seq	cDNA	TRANSCRIPTOMIC	SINGLE	0	ILLUMINA	Illumina Genome Analyzer IIx	SRP009041	GEO Series accession: GSE33060	22085726	154421	SRS267520		10090		Mus musculus	SRA047260	public	YES
SRR354080	2011-11-01 12:28:14	73400151	7413415251	101	5007		unspecified	ftp://ftp-private.ncbi.nlm.nih.gov/sra/sra-instant/reads/ByRun/sra/SRR/SRR354/SRR354080/SRR354080.sra	SRX101769	GSM818956: RNA-Seq Neural progenitor cells, after 24h	RNA-Seq	cDNA	TRANSCRIPTOMIC	SINGLE	0	ILLUMINA	Illumina Genome Analyzer IIx	SRP009041	GEO Series accession: GSE33060	22085726	154421	SRS267521		10090		Mus musculus	SRA047260	public	YES
SRR392624	2011-12-27 13:46:53	33386460	1335458400	40	704		unspecified	ftp://ftp-private.ncbi.nlm.nih.gov/sra/sra-instant/reads/ByRun/sra/SRR/SRR392/SRR392624/SRR392624.sra	SRX113080	GSM851693: mES ELL RNAi RNA-Seq	RNA-Seq	cDNA	TRANSCRIPTOMIC	SINGLE	0	ILLUMINA	Illumina Genome Analyzer IIx	SRP008264	GEO Series accession: GSE32120-2	22195968	147449	SRS283495		10090		Mus musculus	SRA045979	public	YES
SRR392625	2011-12-27 13:46:53	28526018	1141040720	40	778		unspecified	ftp://ftp-private.ncbi.nlm.nih.gov/sra/sra-instant/reads/ByRun/sra/SRR/SRR392/SRR392625/SRR392625.sra	SRX113081	GSM851694: mES control RNAi RNA-Seq rep1	RNA-Seq	cDNA	TRANSCRIPTOMIC	SINGLE	0	ILLUMINA	Illumina Genome Analyzer IIx	SRP008264	GEO Series accession: GSE32120-2	22195968	147449	SRS283496		10090		Mus musculus	SRA045979	public	YES
SRR392626	2011-12-27 13:46:53	41810710	1672428400	40	1027		unspecified	ftp://ftp-private.ncbi.nlm.nih.gov/sra/sra-instant/reads/ByRun/sra/SRR/SRR392/SRR392626/SRR392626.sra	SRX113082	GSM851695: mES control RNAi RNA-Seq rep2	RNA-Seq	cDNA	TRANSCRIPTOMIC	SINGLE	0	ILLUMINA	Illumina Genome Analyzer IIx	SRP008264	GEO Series accession: GSE32120-2	22195968	147449	SRS283497		10090		Mus musculus	SRA045979	public	YES
SRR408704	2012-03-20 17:24:01	14995490	539837640	36	265			ftp://ftp-private.ncbi.nlm.nih.gov/sra/sra-instant/reads/ByRun/sra/SRR/SRR408/SRR408704/SRR408704.sra	SRX120208	GSM876626: RNA-seq mature B [9761]	RNA-Seq	cDNA	TRANSCRIPTOMIC	SINGLE	0	ILLUMINA	Illumina Genome Analyzer	SRP010959	GEO Series accession: GSE35857	0	151881	SRS293671		10090		GSM876626: RNA-seq mature B [9761]	SRA050161	public	YES
SRR408705	2012-03-20 17:24:01	23196667	835080012	36	436			ftp://ftp-private.ncbi.nlm.nih.gov/sra/sra-instant/reads/ByRun/sra/SRR/SRR408/SRR408705/SRR408705.sra	SRX120209	GSM876627: RNA-seq mature B [9762]	RNA-Seq	cDNA	TRANSCRIPTOMIC	SINGLE	0	ILLUMINA	Illumina Genome Analyzer	SRP010959	GEO Series accession: GSE35857	0	151881	SRS293672		10090		GSM876627: RNA-seq mature B [9762]	SRA050161	public	YES
SRR408706	2012-03-20 17:24:01	36228133	2753338108	76	1581			ftp://ftp-private.ncbi.nlm.nih.gov/sra/sra-instant/reads/ByRun/sra/SRR/SRR408/SRR408706/SRR408706.sra	SRX120210	GSM876628: RNA-seq mature B [10423]	RNA-Seq	cDNA	TRANSCRIPTOMIC	SINGLE	0	ILLUMINA	Illumina Genome Analyzer	SRP010959	GEO Series accession: GSE35857	0	151881	SRS293673		10090		GSM876628: RNA-seq mature B [10423]	SRA050161	public	YES
SRR408707	2012-03-20 17:24:01	29271210	1053763560	36	577			ftp://ftp-private.ncbi.nlm.nih.gov/sra/sra-instant/reads/ByRun/sra/SRR/SRR408/SRR408707/SRR408707.sra	SRX120211	GSM876629: RNA-seq mature B [9765]	RNA-Seq	cDNA	TRANSCRIPTOMIC	SINGLE	0	ILLUMINA	Illumina Genome Analyzer	SRP010959	GEO Series accession: GSE35857	0	151881	SRS293674		10090		GSM876629: RNA-seq mature B [9765]	SRA050161	public	YES
SRR408708	2012-03-20 17:24:01	37644155	2860955780	76	1654			ftp://ftp-private.ncbi.nlm.nih.gov/sra/sra-instant/reads/ByRun/sra/SRR/SRR408/SRR408708/SRR408708.sra	SRX120212	GSM876630: RNA-seq mature B [10424]	RNA-Seq	cDNA	TRANSCRIPTOMIC	SINGLE	0	ILLUMINA	Illumina Genome Analyzer	SRP010959	GEO Series accession: GSE35857	0	151881	SRS293675		10090		GSM876630: RNA-seq mature B [10424]	SRA050161	public	YES
SRR408709	2012-03-20 17:24:01	22334932	804057552	36	415			ftp://ftp-private.ncbi.nlm.nih.gov/sra/sra-instant/reads/ByRun/sra/SRR/SRR408/SRR408709/SRR408709.sra	SRX120213	GSM876631: RNA-seq mature B [9764]	RNA-Seq	cDNA	TRANSCRIPTOMIC	SINGLE	0	ILLUMINA	Illumina Genome Analyzer	SRP010959	GEO Series accession: GSE35857	0	151881	SRS293676		10090		GSM876631: RNA-seq mature B [9764]	SRA050161	public	YES
SRR408710	2012-03-20 17:24:01	32673956	2483220656	76	1415			ftp://ftp-private.ncbi.nlm.nih.gov/sra/sra-instant/reads/ByRun/sra/SRR/SRR408/SRR408710/SRR408710.sra	SRX120214	GSM876632: RNA-seq mature B [10425]	RNA-Seq	cDNA	TRANSCRIPTOMIC	SINGLE	0	ILLUMINA	Illumina Genome Analyzer	SRP010959	GEO Series accession: GSE35857	0	151881	SRS293677		10090		GSM876632: RNA-seq mature B [10425]	SRA050161	public	YES
SRR408711	2012-03-20 17:24:01	18714626	673726536	36	336			ftp://ftp-private.ncbi.nlm.nih.gov/sra/sra-instant/reads/ByRun/sra/SRR/SRR408/SRR408711/SRR408711.sra	SRX120215	GSM876633: RNA-seq mature B [9763]	RNA-Seq	cDNA	TRANSCRIPTOMIC	SINGLE	0	ILLUMINA	Illumina Genome Analyzer	SRP010959	GEO Series accession: GSE35857	0	151881	SRS293678		10090		GSM876633: RNA-seq mature B [9763]	SRA050161	public	YES
SRR408712	2012-03-20 17:24:01	43367503	3295930228	76	1983			ftp://ftp-private.ncbi.nlm.nih.gov/sra/sra-instant/reads/ByRun/sra/SRR/SRR408/SRR408712/SRR408712.sra	SRX120216	GSM876634: RNA-seq mature B [10426]	RNA-Seq	cDNA	TRANSCRIPTOMIC	SINGLE	0	ILLUMINA	Illumina Genome Analyzer	SRP010959	GEO Series accession: GSE35857	0	151881	SRS293679		10090		GSM876634: RNA-seq mature B [10426]	SRA050161	public	YES
SRR107061	2011-03-03 09:07:53	18475128	1330209216	72	1339		unspecified	ftp://ftp-private.ncbi.nlm.nih.gov/sra/sra-instant/reads/ByRun/sra/SRR/SRR107/SRR107061/SRR107061.sra	SRX043744	GSM672528: brain_RNAseq_control-oligo_rep1.1	RNA-Seq	cDNA	TRANSCRIPTOMIC	SINGLE	0	ILLUMINA	Illumina Genome Analyzer II	SRP005860	GEO Series accession: GSE27218	21358643	141971	SRS173038		10090	Mus musculus	Mus musculus	SRA030347	public	NO
SRR107062	2011-03-03 09:07:53	20263592	1458978624	72	1469		unspecified	ftp://ftp-private.ncbi.nlm.nih.gov/sra/sra-instant/reads/ByRun/sra/SRR/SRR107/SRR107062/SRR107062.sra	SRX043745	GSM672529: brain_RNAseq_control-oligo_rep2.1	RNA-Seq	cDNA	TRANSCRIPTOMIC	SINGLE	0	ILLUMINA	Illumina Genome Analyzer II	SRP005860	GEO Series accession: GSE27218	21358643	141971	SRS173039		10090	Mus musculus	Mus musculus	SRA030347	public	NO
SRR107063	2011-03-03 09:07:53	17439358	1255633776	72	1264		unspecified	ftp://ftp-private.ncbi.nlm.nih.gov/sra/sra-instant/reads/ByRun/sra/SRR/SRR107/SRR107063/SRR107063.sra	SRX043746	GSM672530: brain_RNAseq_control-oligo_rep3.1	RNA-Seq	cDNA	TRANSCRIPTOMIC	SINGLE	0	ILLUMINA	Illumina Genome Analyzer II	SRP005860	GEO Series accession: GSE27218	21358643	141971	SRS173040		10090	Mus musculus	Mus musculus	SRA030347	public	NO
SRR107064	2011-03-03 09:07:53	19332451	1391936472	72	1401		unspecified	ftp://ftp-private.ncbi.nlm.nih.gov/sra/sra-instant/reads/ByRun/sra/SRR/SRR107/SRR107064/SRR107064.sra	SRX043747	GSM672531: brain_RNAseq_control-oligo_rep4.1	RNA-Seq	cDNA	TRANSCRIPTOMIC	SINGLE	0	ILLUMINA	Illumina Genome Analyzer II	SRP005860	GEO Series accession: GSE27218	21358643	141971	SRS173041		10090	Mus musculus	Mus musculus	SRA030347	public	NO
SRR107065	2011-03-03 09:07:53	19042665	1371071880	72	1380		unspecified	ftp://ftp-private.ncbi.nlm.nih.gov/sra/sra-instant/reads/ByRun/sra/SRR/SRR107/SRR107065/SRR107065.sra	SRX043748	GSM672532: brain_RNAseq_control-oligo_rep4.2	RNA-Seq	cDNA	TRANSCRIPTOMIC	SINGLE	0	ILLUMINA	Illumina Genome Analyzer II	SRP005860	GEO Series accession: GSE27218	21358643	141971	SRS173042		10090	Mus musculus	Mus musculus	SRA030347	public	NO
SRR107066	2011-03-03 09:07:53	24426406	1758701232	72	1771		unspecified	ftp://ftp-private.ncbi.nlm.nih.gov/sra/sra-instant/reads/ByRun/sra/SRR/SRR107/SRR107066/SRR107066.sra	SRX043749	GSM672533: brain_RNAseq_control-oligo_rep1.2	RNA-Seq	cDNA	TRANSCRIPTOMIC	SINGLE	0	ILLUMINA	Illumina Genome Analyzer II	SRP005860	GEO Series accession: GSE27218	21358643	141971	SRS173043		10090	Mus musculus	Mus musculus	SRA030347	public	NO
SRR107067	2011-03-03 09:07:53	26814519	1930645368	72	1944		unspecified	ftp://ftp-private.ncbi.nlm.nih.gov/sra/sra-instant/reads/ByRun/sra/SRR/SRR107/SRR107067/SRR107067.sra	SRX043750	GSM672534: brain_RNAseq_control-oligo_rep2.2	RNA-Seq	cDNA	TRANSCRIPTOMIC	SINGLE	0	ILLUMINA	Illumina Genome Analyzer II	SRP005860	GEO Series accession: GSE27218	21358643	141971	SRS173044		10090	Mus musculus	Mus musculus	SRA030347	public	NO
SRR107068	2011-03-03 09:07:53	27065143	1948690296	72	1962		unspecified	ftp://ftp-private.ncbi.nlm.nih.gov/sra/sra-instant/reads/ByRun/sra/SRR/SRR107/SRR107068/SRR107068.sra	SRX043751	GSM672535: brain_RNAseq_control-oligo_rep2.3	RNA-Seq	cDNA	TRANSCRIPTOMIC	SINGLE	0	ILLUMINA	Illumina Genome Analyzer II	SRP005860	GEO Series accession: GSE27218	21358643	141971	SRS173045		10090	Mus musculus	Mus musculus	SRA030347	public	NO
SRR107069	2011-03-03 09:07:53	23094614	1662812208	72	1674		unspecified	ftp://ftp-private.ncbi.nlm.nih.gov/sra/sra-instant/reads/ByRun/sra/SRR/SRR107/SRR107069/SRR107069.sra	SRX043752	GSM672536: brain_RNAseq_control-oligo_rep3.2	RNA-Seq	cDNA	TRANSCRIPTOMIC	SINGLE	0	ILLUMINA	Illumina Genome Analyzer II	SRP005860	GEO Series accession: GSE27218	21358643	141971	SRS173046		10090	Mus musculus	Mus musculus	SRA030347	public	NO
SRR107070	2011-03-03 09:07:53	22687715	1633515480	72	1645		unspecified	ftp://ftp-private.ncbi.nlm.nih.gov/sra/sra-instant/reads/ByRun/sra/SRR/SRR107/SRR107070/SRR107070.sra	SRX043753	GSM672537: brain_RNAseq_control-oligo_rep3.3	RNA-Seq	cDNA	TRANSCRIPTOMIC	SINGLE	0	ILLUMINA	Illumina Genome Analyzer II	SRP005860	GEO Series accession: GSE27218	21358643	141971	SRS173047		10090	Mus musculus	Mus musculus	SRA030347	public	NO
SRR107071	2011-03-03 09:07:53	26505415	1908389880	72	1922		unspecified	ftp://ftp-private.ncbi.nlm.nih.gov/sra/sra-instant/reads/ByRun/sra/SRR/SRR107/SRR107071/SRR107071.sra	SRX043754	GSM672538: brain_RNAseq_control-oligo_rep4.3	RNA-Seq	cDNA	TRANSCRIPTOMIC	SINGLE	0	ILLUMINA	Illumina Genome Analyzer II	SRP005860	GEO Series accession: GSE27218	21358643	141971	SRS173048		10090	Mus musculus	Mus musculus	SRA030347	public	NO
SRR107072	2011-03-03 09:07:53	15548708	1119506976	72	1127		unspecified	ftp://ftp-private.ncbi.nlm.nih.gov/sra/sra-instant/reads/ByRun/sra/SRR/SRR107/SRR107072/SRR107072.sra	SRX043755	GSM672539: brain_RNAseq_Tdp43-oligo_rep1.1	RNA-Seq	cDNA	TRANSCRIPTOMIC	SINGLE	0	ILLUMINA	Illumina Genome Analyzer II	SRP005860	GEO Series accession: GSE27218	21358643	141971	SRS173049		10090	Mus musculus	Mus musculus	SRA030347	public	NO
SRR107073	2011-03-03 09:07:53	14777990	1064015280	72	1071		unspecified	ftp://ftp-private.ncbi.nlm.nih.gov/sra/sra-instant/reads/ByRun/sra/SRR/SRR107/SRR107073/SRR107073.sra	SRX043756	GSM672540: brain_RNAseq_Tdp43-oligo_rep1.2	RNA-Seq	cDNA	TRANSCRIPTOMIC	SINGLE	0	ILLUMINA	Illumina Genome Analyzer II	SRP005860	GEO Series accession: GSE27218	21358643	141971	SRS173050		10090	Mus musculus	Mus musculus	SRA030347	public	NO
SRR107074	2011-03-03 09:07:53	19756522	1422469584	72	1432		unspecified	ftp://ftp-private.ncbi.nlm.nih.gov/sra/sra-instant/reads/ByRun/sra/SRR/SRR107/SRR107074/SRR107074.sra	SRX043757	GSM672541: brain_RNAseq_Tdp43-oligo_rep2.1	RNA-Seq	cDNA	TRANSCRIPTOMIC	SINGLE	0	ILLUMINA	Illumina Genome Analyzer II	SRP005860	GEO Series accession: GSE27218	21358643	141971	SRS173051		10090	Mus musculus	Mus musculus	SRA030347	public	NO
SRR107075	2011-03-03 09:07:53	17781481	1280266632	72	1289			ftp://ftp-private.ncbi.nlm.nih.gov/sra/sra-instant/reads/ByRun/sra/SRR/SRR107/SRR107075/SRR107075.sra	SRX043758	GSM672542: brain_RNAseq_Tdp43-oligo_rep2.2	RNA-Seq	cDNA	TRANSCRIPTOMIC	SINGLE	0	ILLUMINA	Illumina Genome Analyzer II	SRP005860	GEO Series accession: GSE27218	21358643	141971	SRS173052		10090	Mus musculus	Mus musculus	SRA030347	public	NO
SRR107076	2011-03-03 09:07:53	22306244	1606049568	72	1617		unspecified	ftp://ftp-private.ncbi.nlm.nih.gov/sra/sra-instant/reads/ByRun/sra/SRR/SRR107/SRR107076/SRR107076.sra	SRX043759	GSM672543: brain_RNAseq_Tdp43-oligo_rep1.3	RNA-Seq	cDNA	TRANSCRIPTOMIC	SINGLE	0	ILLUMINA	Illumina Genome Analyzer II	SRP005860	GEO Series accession: GSE27218	21358643	141971	SRS173053		10090	Mus musculus	Mus musculus	SRA030347	public	NO
SRR107077	2011-03-03 09:07:53	21930973	1579030056	72	1590		unspecified	ftp://ftp-private.ncbi.nlm.nih.gov/sra/sra-instant/reads/ByRun/sra/SRR/SRR107/SRR107077/SRR107077.sra	SRX043760	GSM672544: brain_RNAseq_Tdp43-oligo_rep2.3	RNA-Seq	cDNA	TRANSCRIPTOMIC	SINGLE	0	ILLUMINA	Illumina Genome Analyzer II	SRP005860	GEO Series accession: GSE27218	21358643	141971	SRS173054		10090	Mus musculus	Mus musculus	SRA030347	public	NO
SRR107078	2011-03-03 09:07:53	18836553	1356231816	72	1365		unspecified	ftp://ftp-private.ncbi.nlm.nih.gov/sra/sra-instant/reads/ByRun/sra/SRR/SRR107/SRR107078/SRR107078.sra	SRX043761	GSM672545: brain_RNAseq_Tdp43-oligo_rep3.1	RNA-Seq	cDNA	TRANSCRIPTOMIC	SINGLE	0	ILLUMINA	Illumina Genome Analyzer II	SRP005860	GEO Series accession: GSE27218	21358643	141971	SRS173055		10090	Mus musculus	Mus musculus	SRA030347	public	NO
SRR107079	2011-03-03 09:07:53	19714030	1419410160	72	1429		unspecified	ftp://ftp-private.ncbi.nlm.nih.gov/sra/sra-instant/reads/ByRun/sra/SRR/SRR107/SRR107079/SRR107079.sra	SRX043762	GSM672546: brain_RNAseq_Tdp43-oligo_rep4.1	RNA-Seq	cDNA	TRANSCRIPTOMIC	SINGLE	0	ILLUMINA	Illumina Genome Analyzer II	SRP005860	GEO Series accession: GSE27218	21358643	141971	SRS173056		10090	Mus musculus	Mus musculus	SRA030347	public	NO
SRR107080	2011-03-03 09:07:53	26676256	1920690432	72	1934		unspecified	ftp://ftp-private.ncbi.nlm.nih.gov/sra/sra-instant/reads/ByRun/sra/SRR/SRR107/SRR107080/SRR107080.sra	SRX043763	GSM672547: brain_RNAseq_Tdp43-oligo_rep3.2	RNA-Seq	cDNA	TRANSCRIPTOMIC	SINGLE	0	ILLUMINA	Illumina Genome Analyzer II	SRP005860	GEO Series accession: GSE27218	21358643	141971	SRS173057		10090	Mus musculus	Mus musculus	SRA030347	public	NO
SRR107081	2011-03-03 09:07:53	26567498	1912859856	72	1926		unspecified	ftp://ftp-private.ncbi.nlm.nih.gov/sra/sra-instant/reads/ByRun/sra/SRR/SRR107/SRR107081/SRR107081.sra	SRX043764	GSM672548: brain_RNAseq_Tdp43-oligo_rep4.2	RNA-Seq	cDNA	TRANSCRIPTOMIC	SINGLE	0	ILLUMINA	Illumina Genome Analyzer II	SRP005860	GEO Series accession: GSE27218	21358643	141971	SRS173058		10090	Mus musculus	Mus musculus	SRA030347	public	NO
SRR167700	2011-12-01 12:45:44	82123752	5912910144	72	3756		unspecified	ftp://ftp-private.ncbi.nlm.nih.gov/sra/sra-instant/reads/ByRun/sra/SRR/SRR167/SRR167700/SRR167700.sra	SRX054612	GSM665476: F1 E17.5 Brain RNA-seq Cross 1 (BxC)	RNA-Seq	cDNA	TRANSCRIPTOMIC	PAIRED	120	ILLUMINA	Illumina HiSeq 2000	SRP006212	GEO Series accession: GSE27016	0	137705	SRS183452		10090	Mus musculus	Mus musculus	SRA031276	public	YES
SRR167702	2011-12-01 12:45:44	70629658	5085335376	72	3225		unspecified	ftp://ftp-private.ncbi.nlm.nih.gov/sra/sra-instant/reads/ByRun/sra/SRR/SRR167/SRR167702/SRR167702.sra	SRX054613	GSM665477: F1 E17.5 Brain RNA-seq Cross 2 (CxB)	RNA-Seq	cDNA	TRANSCRIPTOMIC	PAIRED	120	ILLUMINA	Illumina HiSeq 2000	SRP006212	GEO Series accession: GSE27016	0	137705	SRS183453		10090	Mus musculus	Mus musculus	SRA031276	public	YES
SRR359852	2012-01-17 09:13:15	19791890	1029178280	52	664			ftp://ftp-private.ncbi.nlm.nih.gov/sra/sra-instant/reads/ByRun/sra/SRR/SRR359/SRR359852/SRR359852.sra	SRX103961	GSM824791: DRG1	RNA-Seq	cDNA	TRANSCRIPTOMIC	SINGLE	0	ILLUMINA	Illumina Genome Analyzer II	SRP009154	GEO Series accession: GSE33343	0	148973	SRS269366		10090		GSM824791: DRG1	SRA047597	public	YES
SRR359853	2012-01-17 09:13:15	20177648	1049237696	52	699			ftp://ftp-private.ncbi.nlm.nih.gov/sra/sra-instant/reads/ByRun/sra/SRR/SRR359/SRR359853/SRR359853.sra	SRX103961	GSM824791: DRG1	RNA-Seq	cDNA	TRANSCRIPTOMIC	SINGLE	0	ILLUMINA	Illumina Genome Analyzer II	SRP009154	GEO Series accession: GSE33343	0	148973	SRS269366		10090		GSM824791: DRG1	SRA047597	public	YES
SRR359854	2012-01-17 09:13:15	17678640	919289280	52	621			ftp://ftp-private.ncbi.nlm.nih.gov/sra/sra-instant/reads/ByRun/sra/SRR/SRR359/SRR359854/SRR359854.sra	SRX103962	GSM824792: DRG2	RNA-Seq	cDNA	TRANSCRIPTOMIC	SINGLE	0	ILLUMINA	Illumina Genome Analyzer II	SRP009154	GEO Series accession: GSE33343	0	148973	SRS269367		10090		GSM824792: DRG2	SRA047597	public	YES
SRR359855	2012-01-17 09:13:15	18536960	963921920	52	666			ftp://ftp-private.ncbi.nlm.nih.gov/sra/sra-instant/reads/ByRun/sra/SRR/SRR359/SRR359855/SRR359855.sra	SRX103962	GSM824792: DRG2	RNA-Seq	cDNA	TRANSCRIPTOMIC	SINGLE	0	ILLUMINA	Illumina Genome Analyzer II	SRP009154	GEO Series accession: GSE33343	0	148973	SRS269367		10090		GSM824792: DRG2	SRA047597	public	YES
SRR359856	2012-01-17 09:13:15	18648591	969726732	52	658			ftp://ftp-private.ncbi.nlm.nih.gov/sra/sra-instant/reads/ByRun/sra/SRR/SRR359/SRR359856/SRR359856.sra	SRX103963	GSM824793: DRG3	RNA-Seq	cDNA	TRANSCRIPTOMIC	SINGLE	0	ILLUMINA	Illumina Genome Analyzer II	SRP009154	GEO Series accession: GSE33343	0	148973	SRS269368		10090		GSM824793: DRG3	SRA047597	public	YES
SRR359857	2012-01-17 09:13:15	19332386	1005284072	52	678			ftp://ftp-private.ncbi.nlm.nih.gov/sra/sra-instant/reads/ByRun/sra/SRR/SRR359/SRR359857/SRR359857.sra	SRX103963	GSM824793: DRG3	RNA-Seq	cDNA	TRANSCRIPTOMIC	SINGLE	0	ILLUMINA	Illumina Genome Analyzer II	SRP009154	GEO Series accession: GSE33343	0	148973	SRS269368		10090		GSM824793: DRG3	SRA047597	public	YES
SRR359858	2012-01-17 09:13:15	19852267	1032317884	52	791			ftp://ftp-private.ncbi.nlm.nih.gov/sra/sra-instant/reads/ByRun/sra/SRR/SRR359/SRR359858/SRR359858.sra	SRX103964	GSM824794: CGN1	RNA-Seq	cDNA	TRANSCRIPTOMIC	SINGLE	0	ILLUMINA	Illumina Genome Analyzer II	SRP009154	GEO Series accession: GSE33343	0	148973	SRS269369		10090		GSM824794: CGN1	SRA047597	public	YES
SRR359859	2012-01-17 09:13:15	21505676	1118295152	52	850			ftp://ftp-private.ncbi.nlm.nih.gov/sra/sra-instant/reads/ByRun/sra/SRR/SRR359/SRR359859/SRR359859.sra	SRX103964	GSM824794: CGN1	RNA-Seq	cDNA	TRANSCRIPTOMIC	SINGLE	0	ILLUMINA	Illumina Genome Analyzer II	SRP009154	GEO Series accession: GSE33343	0	148973	SRS269369		10090		GSM824794: CGN1	SRA047597	public	YES
SRR359860	2012-01-17 09:13:15	22375948	1163549296	52	883			ftp://ftp-private.ncbi.nlm.nih.gov/sra/sra-instant/reads/ByRun/sra/SRR/SRR359/SRR359860/SRR359860.sra	SRX103965	GSM824795: CGN2	RNA-Seq	cDNA	TRANSCRIPTOMIC	SINGLE	0	ILLUMINA	Illumina Genome Analyzer II	SRP009154	GEO Series accession: GSE33343	0	148973	SRS269370		10090		GSM824795: CGN2	SRA047597	public	YES
SRR359861	2012-01-17 09:13:15	22376135	1163559020	52	875			ftp://ftp-private.ncbi.nlm.nih.gov/sra/sra-instant/reads/ByRun/sra/SRR/SRR359/SRR359861/SRR359861.sra	SRX103965	GSM824795: CGN2	RNA-Seq	cDNA	TRANSCRIPTOMIC	SINGLE	0	ILLUMINA	Illumina Genome Analyzer II	SRP009154	GEO Series accession: GSE33343	0	148973	SRS269370		10090		GSM824795: CGN2	SRA047597	public	YES
SRR388248	2011-12-12 09:54:36	32609815	3260981500	100	1859			ftp://ftp-private.ncbi.nlm.nih.gov/sra/sra-instant/reads/ByRun/sra/SRR/SRR388/SRR388248/SRR388248.sra	SRX110684	GSM846186: RV_Mu1 (Mutant sample 1)	RNA-Seq	cDNA	TRANSCRIPTOMIC	PAIRED	185	ILLUMINA	Illumina HiSeq 2000	SRP009662	GEO Series accession: GSE34274	22267199	149953	SRS281938		10090		GSM846186: RV_Mu1 (Mutant sample 1)	SRA048535	public	YES
SRR388249	2011-12-12 09:54:36	29707175	2970717500	100	1672			ftp://ftp-private.ncbi.nlm.nih.gov/sra/sra-instant/reads/ByRun/sra/SRR/SRR388/SRR388249/SRR388249.sra	SRX110685	GSM846187: RV_Mu3 (Mutant sample 3)	RNA-Seq	cDNA	TRANSCRIPTOMIC	PAIRED	185	ILLUMINA	Illumina HiSeq 2000	SRP009662	GEO Series accession: GSE34274	22267199	149953	SRS281939		10090		GSM846187: RV_Mu3 (Mutant sample 3)	SRA048535	public	YES
SRR388250	2011-12-12 09:54:36	27707491	2770749100	100	1570			ftp://ftp-private.ncbi.nlm.nih.gov/sra/sra-instant/reads/ByRun/sra/SRR/SRR388/SRR388250/SRR388250.sra	SRX110686	GSM846188: RV_Wt1 (Wildtype sample 1)	RNA-Seq	cDNA	TRANSCRIPTOMIC	PAIRED	185	ILLUMINA	Illumina HiSeq 2000	SRP009662	GEO Series accession: GSE34274	22267199	149953	SRS281940		10090		GSM846188: RV_Wt1 (Wildtype sample 1)	SRA048535	public	YES
SRR388251	2011-12-12 09:54:36	27090803	2709080300	100	1525			ftp://ftp-private.ncbi.nlm.nih.gov/sra/sra-instant/reads/ByRun/sra/SRR/SRR388/SRR388251/SRR388251.sra	SRX110687	GSM846189: RV_Wt2 (Wildtype sample 2)	RNA-Seq	cDNA	TRANSCRIPTOMIC	PAIRED	185	ILLUMINA	Illumina HiSeq 2000	SRP009662	GEO Series accession: GSE34274	22267199	149953	SRS281941		10090		GSM846189: RV_Wt2 (Wildtype sample 2)	SRA048535	public	YES
SRR394321	2012-02-17 05:08:10	46931703	5350214142	114	3207			ftp://ftp-private.ncbi.nlm.nih.gov/sra/sra-instant/reads/ByRun/sra/SRR/SRR394/SRR394321/SRR394321.sra	SRX113963	GSM856150: Lin28-RV GFP+ DP thymocytes	RNA-Seq	cDNA	TRANSCRIPTOMIC	PAIRED	165	ILLUMINA	Illumina Genome Analyzer IIx	SRP010106	GEO Series accession: GSE34854	0	150133	SRS284695		10090		GSM856150: Lin28-RV GFP+ DP thymocytes	SRA048994	public	YES
SRR394322	2012-02-17 05:08:10	47580928	5424225792	114	3315			ftp://ftp-private.ncbi.nlm.nih.gov/sra/sra-instant/reads/ByRun/sra/SRR/SRR394/SRR394322/SRR394322.sra	SRX113964	GSM856151: Lin28-RV GFP- DP thymocytes	RNA-Seq	cDNA	TRANSCRIPTOMIC	PAIRED	169	ILLUMINA	Illumina Genome Analyzer IIx	SRP010106	GEO Series accession: GSE34854	0	150133	SRS284696		10090		GSM856151: Lin28-RV GFP- DP thymocytes	SRA048994	public	YES
SRR037950	2010-04-14 10:17:04	19115416	2905543232	152	1475		unspecified	ftp://ftp-private.ncbi.nlm.nih.gov/sra/sra-instant/reads/ByRun/sra/SRR/SRR037/SRR037950/SRR037950.sra	SRX017796	120 hours	RNA-Seq	cDNA	TRANSCRIPTOMIC	PAIRED	200	ILLUMINA	Illumina Genome Analyzer	SRP002119	GEO Series accession: GSE20846	20436464	124751	SRS025248		10090	Mus musculus	Mus musculus	SRA012229	public	YES
SRR037951	2010-04-14 10:17:04	21953690	3336960880	152	2201		unspecified	ftp://ftp-private.ncbi.nlm.nih.gov/sra/sra-instant/reads/ByRun/sra/SRR/SRR037/SRR037951/SRR037951.sra	SRX017796	120 hours	RNA-Seq	cDNA	TRANSCRIPTOMIC	PAIRED	200	ILLUMINA	Illumina Genome Analyzer	SRP002119	GEO Series accession: GSE20846	20436464	124751	SRS025248		10090	Mus musculus	Mus musculus	SRA012229	public	YES
SRR037952	2010-04-14 10:17:04	18567994	2822335088	152	1667		unspecified	ftp://ftp-private.ncbi.nlm.nih.gov/sra/sra-instant/reads/ByRun/sra/SRR/SRR037/SRR037952/SRR037952.sra	SRX017797	168 hours	RNA-Seq	cDNA	TRANSCRIPTOMIC	PAIRED	200	ILLUMINA	Illumina Genome Analyzer	SRP002119	GEO Series accession: GSE20846	20436464	124751	SRS025249		10090	Mus musculus	Mus musculus	SRA012229	public	YES
SRR037953	2010-04-14 10:17:04	20159779	3064286408	152	2037		unspecified	ftp://ftp-private.ncbi.nlm.nih.gov/sra/sra-instant/reads/ByRun/sra/SRR/SRR037/SRR037953/SRR037953.sra	SRX017797	168 hours	RNA-Seq	cDNA	TRANSCRIPTOMIC	PAIRED	200	ILLUMINA	Illumina Genome Analyzer	SRP002119	GEO Series accession: GSE20846	20436464	124751	SRS025249		10090	Mus musculus	Mus musculus	SRA012229	public	YES
SRR037954	2010-04-14 10:17:04	23060060	3505129120	152	2330		unspecified	ftp://ftp-private.ncbi.nlm.nih.gov/sra/sra-instant/reads/ByRun/sra/SRR/SRR037/SRR037954/SRR037954.sra	SRX017797	168 hours	RNA-Seq	cDNA	TRANSCRIPTOMIC	PAIRED	200	ILLUMINA	Illumina Genome Analyzer	SRP002119	GEO Series accession: GSE20846	20436464	124751	SRS025249		10090	Mus musculus	Mus musculus	SRA012229	public	YES
SRR309216	2012-03-20 09:00:52	24365692	877164912	36	1173		unspecified	ftp://ftp-private.ncbi.nlm.nih.gov/sra/sra-instant/reads/ByRun/sra/SRR/SRR309/SRR309216/SRR309216.sra	SRX083243	GSM758717: CD4 WT RNA-Seq	RNA-Seq	cDNA	TRANSCRIPTOMIC	SINGLE	0	ILLUMINA	Illumina Genome Analyzer II	SRP007488	GEO Series accession: GSE30578	0	154771	SRS227946		10090		Mus musculus	SRA040078	public	YES
SRR309217	2012-03-20 09:00:52	26668039	960049404	36	1295		unspecified	ftp://ftp-private.ncbi.nlm.nih.gov/sra/sra-instant/reads/ByRun/sra/SRR/SRR309/SRR309217/SRR309217.sra	SRX083244	GSM758718: CD4 KO RNA-Seq	RNA-Seq	cDNA	TRANSCRIPTOMIC	SINGLE	0	ILLUMINA	Illumina Genome Analyzer II	SRP007488	GEO Series accession: GSE30578	0	154771	SRS227947		10090		Mus musculus	SRA040078	public	YES
SRR309218	2012-03-20 09:00:52	21969594	790905384	36	1055		unspecified	ftp://ftp-private.ncbi.nlm.nih.gov/sra/sra-instant/reads/ByRun/sra/SRR/SRR309/SRR309218/SRR309218.sra	SRX083245	GSM758719: CD8 WT RNA-Seq	RNA-Seq	cDNA	TRANSCRIPTOMIC	SINGLE	0	ILLUMINA	Illumina Genome Analyzer II	SRP007488	GEO Series accession: GSE30578	0	154771	SRS227948		10090		Mus musculus	SRA040078	public	YES
SRR309219	2012-03-20 09:00:52	24723444	890043984	36	1195		unspecified	ftp://ftp-private.ncbi.nlm.nih.gov/sra/sra-instant/reads/ByRun/sra/SRR/SRR309/SRR309219/SRR309219.sra	SRX083246	GSM758720: CD8 KO RNA-Seq	RNA-Seq	cDNA	TRANSCRIPTOMIC	SINGLE	0	ILLUMINA	Illumina Genome Analyzer II	SRP007488	GEO Series accession: GSE30578	0	154771	SRS227949		10090		Mus musculus	SRA040078	public	YES
SRR315127	2011-07-21 11:27:03	49655742	1787606712	36	1221		unspecified	ftp://ftp-private.ncbi.nlm.nih.gov/sra/sra-instant/reads/ByRun/sra/SRR/SRR315/SRR315127/SRR315127.sra	SRX084587	GSM761213: PGK12.1ES_RNASeq	RNA-Seq	cDNA	TRANSCRIPTOMIC	SINGLE	0	ILLUMINA	Illumina Genome Analyzer	SRP007530	GEO Series accession: GSE30690	22019781	154695	SRS241922		10090		Mus musculus	SRA040235	public	YES
SRR315128	2011-07-21 11:31:04	51990497	1871657892	36	1646		unspecified	ftp://ftp-private.ncbi.nlm.nih.gov/sra/sra-instant/reads/ByRun/sra/SRR/SRR315/SRR315128/SRR315128.sra	SRX084587	GSM761213: PGK12.1ES_RNASeq	RNA-Seq	cDNA	TRANSCRIPTOMIC	SINGLE	0	ILLUMINA	Illumina Genome Analyzer	SRP007530	GEO Series accession: GSE30690	22019781	154695	SRS241922		10090		Mus musculus	SRA040235	public	YES
SRR315129	2011-07-21 11:33:03	52973494	1907045784	36	1646		unspecified	ftp://ftp-private.ncbi.nlm.nih.gov/sra/sra-instant/reads/ByRun/sra/SRR/SRR315/SRR315129/SRR315129.sra	SRX084587	GSM761213: PGK12.1ES_RNASeq	RNA-Seq	cDNA	TRANSCRIPTOMIC	SINGLE	0	ILLUMINA	Illumina Genome Analyzer	SRP007530	GEO Series accession: GSE30690	22019781	154695	SRS241922		10090		Mus musculus	SRA040235	public	YES
SRR315130	2011-07-21 11:34:04	52510641	1890383076	36	1605		unspecified	ftp://ftp-private.ncbi.nlm.nih.gov/sra/sra-instant/reads/ByRun/sra/SRR/SRR315/SRR315130/SRR315130.sra	SRX084587	GSM761213: PGK12.1ES_RNASeq	RNA-Seq	cDNA	TRANSCRIPTOMIC	SINGLE	0	ILLUMINA	Illumina Genome Analyzer	SRP007530	GEO Series accession: GSE30690	22019781	154695	SRS241922		10090		Mus musculus	SRA040235	public	YES
SRR332189	2012-02-13 10:27:49	13333334	2400000120	180	1641		unspecified	ftp://ftp-private.ncbi.nlm.nih.gov/sra/sra-instant/reads/ByRun/sra/SRR/SRR332/SRR332189/SRR332189.sra	SRX092400	GSM782668: RNA-seq of IL-10 treated macrophages	RNA-Seq	cDNA	TRANSCRIPTOMIC	PAIRED	188	ILLUMINA	Illumina HiSeq 2000	SRP007864	GEO Series accession: GSE31530	0	154983	SRS258088		10090		Mus musculus	SRA045444	public	YES
SRR332190	2012-02-13 10:27:49	13333334	2400000120	180	1505		unspecified	ftp://ftp-private.ncbi.nlm.nih.gov/sra/sra-instant/reads/ByRun/sra/SRR/SRR332/SRR332190/SRR332190.sra	SRX092401	GSM782669: RNA-seq of Untreated macrophages	RNA-Seq	cDNA	TRANSCRIPTOMIC	PAIRED	197	ILLUMINA	Illumina HiSeq 2000	SRP007864	GEO Series accession: GSE31530	0	154983	SRS258089		10090		Mus musculus	SRA045444	public	YES
SRR414942	2012-03-01 13:10:00	42201326	4220132600	100	2963			ftp://ftp-private.ncbi.nlm.nih.gov/sra/sra-instant/reads/ByRun/sra/SRR/SRR414/SRR414942/SRR414942.sra	SRX122634	GSM881355: E14_d0_RNA-seq	RNA-Seq	cDNA	TRANSCRIPTOMIC	SINGLE	0	ILLUMINA	Illumina Genome Analyzer II	SRP011077	GEO Series accession: GSE36114	0	152995	SRS295503		10090		GSM881355: E14_d0_RNA-seq	SRA050313	public	YES
SRR414943	2012-03-01 13:10:00	27771151	2777115100	100	1854			ftp://ftp-private.ncbi.nlm.nih.gov/sra/sra-instant/reads/ByRun/sra/SRR/SRR414/SRR414943/SRR414943.sra	SRX122634	GSM881355: E14_d0_RNA-seq	RNA-Seq	cDNA	TRANSCRIPTOMIC	SINGLE	0	ILLUMINA	Illumina Genome Analyzer II	SRP011077	GEO Series accession: GSE36114	0	152995	SRS295503		10090		GSM881355: E14_d0_RNA-seq	SRA050313	public	YES
SRR414952	2012-03-01 13:10:00	37213304	3721330400	100	2618			ftp://ftp-private.ncbi.nlm.nih.gov/sra/sra-instant/reads/ByRun/sra/SRR/SRR414/SRR414952/SRR414952.sra	SRX122643	GSM881364: E14_d4_RNA-seq	RNA-Seq	cDNA	TRANSCRIPTOMIC	SINGLE	0	ILLUMINA	Illumina Genome Analyzer II	SRP011077	GEO Series accession: GSE36114	0	152995	SRS295512		10090		GSM881364: E14_d4_RNA-seq	SRA050313	public	YES
SRR414953	2012-03-01 13:10:00	24320719	2432071900	100	1621			ftp://ftp-private.ncbi.nlm.nih.gov/sra/sra-instant/reads/ByRun/sra/SRR/SRR414/SRR414953/SRR414953.sra	SRX122643	GSM881364: E14_d4_RNA-seq	RNA-Seq	cDNA	TRANSCRIPTOMIC	SINGLE	0	ILLUMINA	Illumina Genome Analyzer II	SRP011077	GEO Series accession: GSE36114	0	152995	SRS295512		10090		GSM881364: E14_d4_RNA-seq	SRA050313	public	YES
SRR414962	2012-03-01 13:10:00	29706100	2970610000	100	2100			ftp://ftp-private.ncbi.nlm.nih.gov/sra/sra-instant/reads/ByRun/sra/SRR/SRR414/SRR414962/SRR414962.sra	SRX122652	GSM881373: E14_d6_RNA-seq	RNA-Seq	cDNA	TRANSCRIPTOMIC	SINGLE	0	ILLUMINA	Illumina Genome Analyzer II	SRP011077	GEO Series accession: GSE36114	0	152995	SRS295521		10090		GSM881373: E14_d6_RNA-seq	SRA050313	public	YES
SRR414963	2012-03-01 13:10:00	20545852	2054585200	100	1371			ftp://ftp-private.ncbi.nlm.nih.gov/sra/sra-instant/reads/ByRun/sra/SRR/SRR414/SRR414963/SRR414963.sra	SRX122652	GSM881373: E14_d6_RNA-seq	RNA-Seq	cDNA	TRANSCRIPTOMIC	SINGLE	0	ILLUMINA	Illumina Genome Analyzer II	SRP011077	GEO Series accession: GSE36114	0	152995	SRS295521		10090		GSM881373: E14_d6_RNA-seq	SRA050313	public	YES
SRR037945	2010-04-14 10:17:04	22205089	3375173528	152	1900		unspecified	ftp://ftp-private.ncbi.nlm.nih.gov/sra/sra-instant/reads/ByRun/sra/SRR/SRR037/SRR037945/SRR037945.sra	SRX017794	-24 hours	RNA-Seq	cDNA	TRANSCRIPTOMIC	PAIRED	200	ILLUMINA	Illumina Genome Analyzer	SRP002119	GEO Series accession: GSE20846	20436464	124751	SRS025246		10090	Mus musculus	Mus musculus	SRA012229	public	YES
SRR037946	2010-04-14 10:17:04	19979450	3036876400	152	1743		unspecified	ftp://ftp-private.ncbi.nlm.nih.gov/sra/sra-instant/reads/ByRun/sra/SRR/SRR037/SRR037946/SRR037946.sra	SRX017794	-24 hours	RNA-Seq	cDNA	TRANSCRIPTOMIC	PAIRED	200	ILLUMINA	Illumina Genome Analyzer	SRP002119	GEO Series accession: GSE20846	20436464	124751	SRS025246		10090	Mus musculus	Mus musculus	SRA012229	public	YES
SRR037947	2010-04-14 10:17:04	24336126	3699091152	152	2065		unspecified	ftp://ftp-private.ncbi.nlm.nih.gov/sra/sra-instant/reads/ByRun/sra/SRR/SRR037/SRR037947/SRR037947.sra	SRX017795	60 hours	RNA-Seq	cDNA	TRANSCRIPTOMIC	PAIRED	200	ILLUMINA	Illumina Genome Analyzer	SRP002119	GEO Series accession: GSE20846	20436464	124751	SRS025247		10090	Mus musculus	Mus musculus	SRA012229	public	YES
SRR037948	2010-04-14 10:17:04	22868507	3476013064	152	1952		unspecified	ftp://ftp-private.ncbi.nlm.nih.gov/sra/sra-instant/reads/ByRun/sra/SRR/SRR037/SRR037948/SRR037948.sra	SRX017795	60 hours	RNA-Seq	cDNA	TRANSCRIPTOMIC	PAIRED	200	ILLUMINA	Illumina Genome Analyzer	SRP002119	GEO Series accession: GSE20846	20436464	124751	SRS025247		10090	Mus musculus	Mus musculus	SRA012229	public	YES
SRR037949	2010-04-14 10:17:04	22987398	3494084496	152	1962		unspecified	ftp://ftp-private.ncbi.nlm.nih.gov/sra/sra-instant/reads/ByRun/sra/SRR/SRR037/SRR037949/SRR037949.sra	SRX017795	60 hours	RNA-Seq	cDNA	TRANSCRIPTOMIC	PAIRED	200	ILLUMINA	Illumina Genome Analyzer	SRP002119	GEO Series accession: GSE20846	20436464	124751	SRS025247		10090	Mus musculus	Mus musculus	SRA012229	public	YES
SRR065234	2011-01-03 10:25:41	3441542	123895512	36	131		unspecified	ftp://ftp-private.ncbi.nlm.nih.gov/sra/sra-instant/reads/ByRun/sra/SRR/SRR065/SRR065234/SRR065234.sra	SRX026513	GSM579127: ThioMac-totalRNA-RNA-Seq	RNA-Seq	cDNA	TRANSCRIPTOMIC	SINGLE	0	ILLUMINA	Illumina Genome Analyzer II	SRP003475	GEO Series accession: GSE23619	0	133349	SRS114582		10090	Mus musculus	Mus musculus	SRA023820	public	YES
SRR065235	2011-01-03 10:25:41	946363	34069068	36	36		unspecified	ftp://ftp-private.ncbi.nlm.nih.gov/sra/sra-instant/reads/ByRun/sra/SRR/SRR065/SRR065235/SRR065235.sra	SRX026513	GSM579127: ThioMac-totalRNA-RNA-Seq	RNA-Seq	cDNA	TRANSCRIPTOMIC	SINGLE	0	ILLUMINA	Illumina Genome Analyzer II	SRP003475	GEO Series accession: GSE23619	0	133349	SRS114582		10090	Mus musculus	Mus musculus	SRA023820	public	YES
SRR065236	2011-01-03 10:25:41	4068099	146451564	36	155			ftp://ftp-private.ncbi.nlm.nih.gov/sra/sra-instant/reads/ByRun/sra/SRR/SRR065/SRR065236/SRR065236.sra	SRX026513	GSM579127: ThioMac-totalRNA-RNA-Seq	RNA-Seq	cDNA	TRANSCRIPTOMIC	SINGLE	0	ILLUMINA	Illumina Genome Analyzer II	SRP003475	GEO Series accession: GSE23619	0	133349	SRS114582		10090	Mus musculus	Mus musculus	SRA023820	public	YES
SRR065237	2011-01-03 10:25:41	18704224	673352064	36	713		unspecified	ftp://ftp-private.ncbi.nlm.nih.gov/sra/sra-instant/reads/ByRun/sra/SRR/SRR065/SRR065237/SRR065237.sra	SRX026513	GSM579127: ThioMac-totalRNA-RNA-Seq	RNA-Seq	cDNA	TRANSCRIPTOMIC	SINGLE	0	ILLUMINA	Illumina Genome Analyzer II	SRP003475	GEO Series accession: GSE23619	0	133349	SRS114582		10090	Mus musculus	Mus musculus	SRA023820	public	YES
SRR065238	2011-01-03 10:25:41	7943894	285980184	36	303		unspecified	ftp://ftp-private.ncbi.nlm.nih.gov/sra/sra-instant/reads/ByRun/sra/SRR/SRR065/SRR065238/SRR065238.sra	SRX026514	GSM579128: ThioMac-totalRNA-Kdo2-1h-RNA-Seq	RNA-Seq	cDNA	TRANSCRIPTOMIC	SINGLE	0	ILLUMINA	Illumina Genome Analyzer II	SRP003475	GEO Series accession: GSE23619	0	133349	SRS114583		10090	Mus musculus	Mus musculus	SRA023820	public	YES
SRR065239	2011-01-03 10:25:41	21262315	765443340	36	811			ftp://ftp-private.ncbi.nlm.nih.gov/sra/sra-instant/reads/ByRun/sra/SRR/SRR065/SRR065239/SRR065239.sra	SRX026514	GSM579128: ThioMac-totalRNA-Kdo2-1h-RNA-Seq	RNA-Seq	cDNA	TRANSCRIPTOMIC	SINGLE	0	ILLUMINA	Illumina Genome Analyzer II	SRP003475	GEO Series accession: GSE23619	0	133349	SRS114583		10090	Mus musculus	Mus musculus	SRA023820	public	YES
SRR402760	2012-03-01 13:11:12	28014973	1064568974	38	609			ftp://ftp-private.ncbi.nlm.nih.gov/sra/sra-instant/reads/ByRun/sra/SRR/SRR402/SRR402760/SRR402760.sra	SRX117943	GSM866982: ES_XY_Solexa_Illu	RNA-Seq	cDNA	TRANSCRIPTOMIC	SINGLE	0	ILLUMINA	Illumina Genome Analyzer IIx	SRP010603	GEO Series accession: GSE35368	0	152595	SRS290412		10090		GSM866982: ES_XY_Solexa_Illu	SRA049663	public	NO
SRR402766	2012-03-01 13:11:12	10262556	513127800	50	288			ftp://ftp-private.ncbi.nlm.nih.gov/sra/sra-instant/reads/ByRun/sra/SRR/SRR402/SRR402766/SRR402766.sra	SRX117949	GSM866988: ES_XX_Solexa_i_IDT	RNA-Seq	cDNA	TRANSCRIPTOMIC	SINGLE	0	ILLUMINA	Illumina HiSeq 2000	SRP010603	GEO Series accession: GSE35368	0	152595	SRS290418		10090		GSM866988: ES_XX_Solexa_i_IDT	SRA049663	public	NO
SRR407172	2012-02-09 09:39:35	38293686	7658737200	200	4487			ftp://ftp-private.ncbi.nlm.nih.gov/sra/sra-instant/reads/ByRun/sra/SRR/SRR407/SRR407172/SRR407172.sra	SRX119105	GSM871914: TCRa-1	RNA-Seq	cDNA	TRANSCRIPTOMIC	PAIRED	0	ILLUMINA	Illumina HiSeq 2000	SRP010815	GEO Series accession: GSE35626	0	152469	SRS291410		10090		GSM871914: TCRa-1	SRA049969	public	NO
SRR407173	2012-02-09 09:39:35	37190887	7438177400	200	4308			ftp://ftp-private.ncbi.nlm.nih.gov/sra/sra-instant/reads/ByRun/sra/SRR/SRR407/SRR407173/SRR407173.sra	SRX119106	GSM871915: TCRa-2	RNA-Seq	cDNA	TRANSCRIPTOMIC	PAIRED	0	ILLUMINA	Illumina HiSeq 2000	SRP010815	GEO Series accession: GSE35626	0	152469	SRS291411		10090		GSM871915: TCRa-2	SRA049969	public	NO
SRR384980	2012-04-02 14:38:45	25153995	1911703620	76	1325			ftp://ftp-private.ncbi.nlm.nih.gov/sra/sra-instant/reads/ByRun/sra/SRR/SRR384/SRR384980/SRR384980.sra	SRX109326	GSM839873: KO library 1	RNA-Seq	cDNA	TRANSCRIPTOMIC	SINGLE	0	ILLUMINA	Illumina Genome Analyzer IIx	SRP009464	GEO Series accession: GSE33979	0	150517	SRS281044		10090		GSM839873: KO library 1	SRA048255	public	YES
SRR384981	2012-04-02 14:38:45	26269828	1996506928	76	1317			ftp://ftp-private.ncbi.nlm.nih.gov/sra/sra-instant/reads/ByRun/sra/SRR/SRR384/SRR384981/SRR384981.sra	SRX109327	GSM839874: KO library 2	RNA-Seq	cDNA	TRANSCRIPTOMIC	SINGLE	0	ILLUMINA	Illumina Genome Analyzer IIx	SRP009464	GEO Series accession: GSE33979	0	150517	SRS281045		10090		GSM839874: KO library 2	SRA048255	public	YES
SRR384982	2012-04-02 14:38:45	25988788	1975147888	76	1280			ftp://ftp-private.ncbi.nlm.nih.gov/sra/sra-instant/reads/ByRun/sra/SRR/SRR384/SRR384982/SRR384982.sra	SRX109328	GSM839875: KO library 3	RNA-Seq	cDNA	TRANSCRIPTOMIC	SINGLE	0	ILLUMINA	Illumina Genome Analyzer IIx	SRP009464	GEO Series accession: GSE33979	0	150517	SRS281046		10090		GSM839875: KO library 3	SRA048255	public	YES
SRR404350	2012-04-06 09:03:34	12572435	1257243500	100	852			ftp://ftp-private.ncbi.nlm.nih.gov/sra/sra-instant/reads/ByRun/sra/SRR/SRR404/SRR404350/SRR404350.sra	SRX118642	GSM871338: Smarcal1+/+ liver at 20oC- lane 1	RNA-Seq	cDNA	TRANSCRIPTOMIC	PAIRED	219	ILLUMINA	Illumina Genome Analyzer II	SRP010780	GEO Series accession: GSE35553	0	156083	SRS291318		10090		GSM871338: Smarcal1+/+ liver at 20oC- lane 1	SRA049921	public	YES
SRR404351	2012-04-06 09:03:34	13801365	1380136500	100	972			ftp://ftp-private.ncbi.nlm.nih.gov/sra/sra-instant/reads/ByRun/sra/SRR/SRR404/SRR404351/SRR404351.sra	SRX118643	GSM871339: Smarcal1+/+ liver at 20oC- lane 2	RNA-Seq	cDNA	TRANSCRIPTOMIC	PAIRED	214	ILLUMINA	Illumina Genome Analyzer II	SRP010780	GEO Series accession: GSE35553	0	156083	SRS291319		10090		GSM871339: Smarcal1+/+ liver at 20oC- lane 2	SRA049921	public	YES
SRR404352	2012-04-06 09:03:34	9218083	921808300	100	658			ftp://ftp-private.ncbi.nlm.nih.gov/sra/sra-instant/reads/ByRun/sra/SRR/SRR404/SRR404352/SRR404352.sra	SRX118644	GSM871343: Smarcal1del/del liver at 20oC- lane 1	RNA-Seq	cDNA	TRANSCRIPTOMIC	PAIRED	477	ILLUMINA	Illumina Genome Analyzer II	SRP010780	GEO Series accession: GSE35553	0	156083	SRS291320		10090		GSM871343: Smarcal1del/del liver at 20oC- lane 1	SRA049921	public	NO
SRR404353	2012-04-06 09:03:34	12132806	1213280600	100	786			ftp://ftp-private.ncbi.nlm.nih.gov/sra/sra-instant/reads/ByRun/sra/SRR/SRR404/SRR404353/SRR404353.sra	SRX118645	GSM871344: Smarcal1del/del liver at 20oC- lane 2	RNA-Seq	cDNA	TRANSCRIPTOMIC	PAIRED	538	ILLUMINA	Illumina Genome Analyzer II	SRP010780	GEO Series accession: GSE35553	0	156083	SRS291321		10090		GSM871344: Smarcal1del/del liver at 20oC- lane 2	SRA049921	public	YES
SRR404354	2012-04-06 09:03:34	10353791	1035379100	100	705			ftp://ftp-private.ncbi.nlm.nih.gov/sra/sra-instant/reads/ByRun/sra/SRR/SRR404/SRR404354/SRR404354.sra	SRX118646	GSM871345: Smarcal1+/+ liver at 39.5oC- lane 1	RNA-Seq	cDNA	TRANSCRIPTOMIC	PAIRED	244	ILLUMINA	Illumina Genome Analyzer II	SRP010780	GEO Series accession: GSE35553	0	156083	SRS291322		10090		GSM871345: Smarcal1+/+ liver at 39.5oC- lane 1	SRA049921	public	YES
SRR404355	2012-04-06 09:03:34	13407653	1340765300	100	888			ftp://ftp-private.ncbi.nlm.nih.gov/sra/sra-instant/reads/ByRun/sra/SRR/SRR404/SRR404355/SRR404355.sra	SRX118647	GSM871346: Smarcal1+/+ liver at 39.5oC- lane 2	RNA-Seq	cDNA	TRANSCRIPTOMIC	PAIRED	362	ILLUMINA	Illumina Genome Analyzer II	SRP010780	GEO Series accession: GSE35553	0	156083	SRS291323		10090		GSM871346: Smarcal1+/+ liver at 39.5oC- lane 2	SRA049921	public	YES
SRR404356	2012-04-06 09:03:34	8544908	854490800	100	592			ftp://ftp-private.ncbi.nlm.nih.gov/sra/sra-instant/reads/ByRun/sra/SRR/SRR404/SRR404356/SRR404356.sra	SRX118648	GSM871347: Smarcal1del/del liver at 39.5oC- lane 1	RNA-Seq	cDNA	TRANSCRIPTOMIC	PAIRED	240	ILLUMINA	Illumina Genome Analyzer II	SRP010780	GEO Series accession: GSE35553	0	156083	SRS291324		10090		GSM871347: Smarcal1del/del liver at 39.5oC- lane 1	SRA049921	public	NO
SRR404357	2012-04-06 09:03:34	12598076	1259807600	100	847			ftp://ftp-private.ncbi.nlm.nih.gov/sra/sra-instant/reads/ByRun/sra/SRR/SRR404/SRR404357/SRR404357.sra	SRX118649	GSM871348: Smarcal1del/del liver at 39.5oC- lane 2	RNA-Seq	cDNA	TRANSCRIPTOMIC	PAIRED	535	ILLUMINA	Illumina Genome Analyzer II	SRP010780	GEO Series accession: GSE35553	0	156083	SRS291325		10090		GSM871348: Smarcal1del/del liver at 39.5oC- lane 2	SRA049921	public	YES
SRR452392	2012-04-03 10:24:49	27326414	1448299942	53	739			ftp://ftp-private.ncbi.nlm.nih.gov/sra/sra-instant/reads/ByRun/sra/SRR/SRR452/SRR452392/SRR452392.sra	SRX134916	GSM907686: small RNA from lung tissue in Mouse Strain 129 infected with Flu, rep1	RNA-Seq	cDNA	TRANSCRIPTOMIC	SINGLE	0	ILLUMINA	Illumina Genome Analyzer IIx	SRP012018	GEO Series accession: GSE36971	0	157353	SRS306753		10090		GSM907686: small RNA from lung tissue in Mouse Strain 129 infected with Flu, rep1	SRA051373	public	NO
SRR452393	2012-04-03 10:24:49	26024328	1379289384	53	713			ftp://ftp-private.ncbi.nlm.nih.gov/sra/sra-instant/reads/ByRun/sra/SRR/SRR452/SRR452393/SRR452393.sra	SRX134917	GSM907687: small RNA from lung tissue in Mouse Strain 129 infected with Flu, rep2	RNA-Seq	cDNA	TRANSCRIPTOMIC	SINGLE	0	ILLUMINA	Illumina Genome Analyzer IIx	SRP012018	GEO Series accession: GSE36971	0	157353	SRS306754		10090		GSM907687: small RNA from lung tissue in Mouse Strain 129 infected with Flu, rep2	SRA051373	public	NO
SRR452394	2012-04-03 10:24:49	29394413	1557903889	53	793			ftp://ftp-private.ncbi.nlm.nih.gov/sra/sra-instant/reads/ByRun/sra/SRR/SRR452/SRR452394/SRR452394.sra	SRX134918	GSM907688: small RNA from lung tissue in Mouse Strain 129 Mock, rep1	RNA-Seq	cDNA	TRANSCRIPTOMIC	SINGLE	0	ILLUMINA	Illumina Genome Analyzer IIx	SRP012018	GEO Series accession: GSE36971	0	157353	SRS306755		10090		GSM907688: small RNA from lung tissue in Mouse Strain 129 Mock, rep1	SRA051373	public	NO
SRR452395	2012-04-03 10:24:49	19572430	1037338790	53	510			ftp://ftp-private.ncbi.nlm.nih.gov/sra/sra-instant/reads/ByRun/sra/SRR/SRR452/SRR452395/SRR452395.sra	SRX134919	GSM907689: small RNA from lung tissue in Mouse Strain Cast infected with Flu, rep1	RNA-Seq	cDNA	TRANSCRIPTOMIC	SINGLE	0	ILLUMINA	Illumina Genome Analyzer IIx	SRP012018	GEO Series accession: GSE36971	0	157353	SRS306756		10090		GSM907689: small RNA from lung tissue in Mouse Strain Cast infected with Flu, rep1	SRA051373	public	NO
SRR452396	2012-04-03 10:24:49	19532429	1035218737	53	505			ftp://ftp-private.ncbi.nlm.nih.gov/sra/sra-instant/reads/ByRun/sra/SRR/SRR452/SRR452396/SRR452396.sra	SRX134920	GSM907690: small RNA from lung tissue in Mouse Strain Cast infected with Flu, rep2	RNA-Seq	cDNA	TRANSCRIPTOMIC	SINGLE	0	ILLUMINA	Illumina Genome Analyzer IIx	SRP012018	GEO Series accession: GSE36971	0	157353	SRS306757		10090		GSM907690: small RNA from lung tissue in Mouse Strain Cast infected with Flu, rep2	SRA051373	public	NO
SRR452397	2012-04-03 10:24:49	18222982	965818046	53	477			ftp://ftp-private.ncbi.nlm.nih.gov/sra/sra-instant/reads/ByRun/sra/SRR/SRR452/SRR452397/SRR452397.sra	SRX134921	GSM907691: small RNA from lung tissue in Mouse Strain Cast Mock, rep1	RNA-Seq	cDNA	TRANSCRIPTOMIC	SINGLE	0	ILLUMINA	Illumina Genome Analyzer IIx	SRP012018	GEO Series accession: GSE36971	0	157353	SRS306758		10090		GSM907691: small RNA from lung tissue in Mouse Strain Cast Mock, rep1	SRA051373	public	NO
SRR452398	2012-04-03 10:24:49	27042618	1433258754	53	725			ftp://ftp-private.ncbi.nlm.nih.gov/sra/sra-instant/reads/ByRun/sra/SRR/SRR452/SRR452398/SRR452398.sra	SRX134922	GSM907692: small RNA from lung tissue in Mouse Strain PWK infected with Flu, rep1	RNA-Seq	cDNA	TRANSCRIPTOMIC	SINGLE	0	ILLUMINA	Illumina Genome Analyzer IIx	SRP012018	GEO Series accession: GSE36971	0	157353	SRS306759		10090		GSM907692: small RNA from lung tissue in Mouse Strain PWK infected with Flu, rep1	SRA051373	public	NO
SRR452399	2012-04-03 10:24:49	25723631	1363352443	53	677			ftp://ftp-private.ncbi.nlm.nih.gov/sra/sra-instant/reads/ByRun/sra/SRR/SRR452/SRR452399/SRR452399.sra	SRX134923	GSM907693: small RNA from lung tissue in Mouse Strain PWK infected with Flu, rep2	RNA-Seq	cDNA	TRANSCRIPTOMIC	SINGLE	0	ILLUMINA	Illumina Genome Analyzer IIx	SRP012018	GEO Series accession: GSE36971	0	157353	SRS306760		10090		GSM907693: small RNA from lung tissue in Mouse Strain PWK infected with Flu, rep2	SRA051373	public	NO
SRR452400	2012-04-03 10:24:49	23941886	1268919958	53	620			ftp://ftp-private.ncbi.nlm.nih.gov/sra/sra-instant/reads/ByRun/sra/SRR/SRR452/SRR452400/SRR452400.sra	SRX134924	GSM907694: small RNA from lung tissue in Mouse Strain PWK Mock, rep1	RNA-Seq	cDNA	TRANSCRIPTOMIC	SINGLE	0	ILLUMINA	Illumina Genome Analyzer IIx	SRP012018	GEO Series accession: GSE36971	0	157353	SRS306761		10090		GSM907694: small RNA from lung tissue in Mouse Strain PWK Mock, rep1	SRA051373	public	NO
SRR452401	2012-04-03 10:24:49	27765825	1471588725	53	747			ftp://ftp-private.ncbi.nlm.nih.gov/sra/sra-instant/reads/ByRun/sra/SRR/SRR452/SRR452401/SRR452401.sra	SRX134925	GSM907695: small RNA from lung tissue in Mouse Strain WSB infected with Flu, rep1	RNA-Seq	cDNA	TRANSCRIPTOMIC	SINGLE	0	ILLUMINA	Illumina Genome Analyzer IIx	SRP012018	GEO Series accession: GSE36971	0	157353	SRS306762		10090		GSM907695: small RNA from lung tissue in Mouse Strain WSB infected with Flu, rep1	SRA051373	public	NO
SRR452402	2012-04-03 10:24:49	33437679	1772196987	53	970			ftp://ftp-private.ncbi.nlm.nih.gov/sra/sra-instant/reads/ByRun/sra/SRR/SRR452/SRR452402/SRR452402.sra	SRX134926	GSM907696: small RNA from lung tissue in Mouse Strain WSB infected with Flu, rep2	RNA-Seq	cDNA	TRANSCRIPTOMIC	SINGLE	0	ILLUMINA	Illumina Genome Analyzer IIx	SRP012018	GEO Series accession: GSE36971	0	157353	SRS306763		10090		GSM907696: small RNA from lung tissue in Mouse Strain WSB infected with Flu, rep2	SRA051373	public	NO
SRR452403	2012-04-03 10:24:49	29067316	1540567748	53	802			ftp://ftp-private.ncbi.nlm.nih.gov/sra/sra-instant/reads/ByRun/sra/SRR/SRR452/SRR452403/SRR452403.sra	SRX134927	GSM907697: small RNA from lung tissue in Mouse Strain WSB Mock, rep1	RNA-Seq	cDNA	TRANSCRIPTOMIC	SINGLE	0	ILLUMINA	Illumina Genome Analyzer IIx	SRP012018	GEO Series accession: GSE36971	0	157353	SRS306764		10090		GSM907697: small RNA from lung tissue in Mouse Strain WSB Mock, rep1	SRA051373	public	NO
SRR452404	2012-04-03 10:24:49	22277732	1091608868	49	494			ftp://ftp-private.ncbi.nlm.nih.gov/sra/sra-instant/reads/ByRun/sra/SRR/SRR452/SRR452404/SRR452404.sra	SRX134928	GSM907698: small RNA from lung tissue in Mouse Strain 129 infected with Flu	RNA-Seq	cDNA	TRANSCRIPTOMIC	SINGLE	0	ILLUMINA	Illumina Genome Analyzer IIx	SRP012018	GEO Series accession: GSE36971	0	157353	SRS306765		10090		GSM907698: small RNA from lung tissue in Mouse Strain 129 infected with Flu	SRA051373	public	NO
SRR452405	2012-04-03 10:24:49	18541794	908547906	49	422			ftp://ftp-private.ncbi.nlm.nih.gov/sra/sra-instant/reads/ByRun/sra/SRR/SRR452/SRR452405/SRR452405.sra	SRX134929	GSM907699: small RNA from lung tissue in Mouse Strain 129 Mock	RNA-Seq	cDNA	TRANSCRIPTOMIC	SINGLE	0	ILLUMINA	Illumina Genome Analyzer IIx	SRP012018	GEO Series accession: GSE36971	0	157353	SRS306766		10090		GSM907699: small RNA from lung tissue in Mouse Strain 129 Mock	SRA051373	public	NO
SRR452406	2012-04-03 10:24:49	17976476	880847324	49	393			ftp://ftp-private.ncbi.nlm.nih.gov/sra/sra-instant/reads/ByRun/sra/SRR/SRR452/SRR452406/SRR452406.sra	SRX134930	GSM907700: small RNA from lung tissue in Mouse Strain WSB infected with Flu	RNA-Seq	cDNA	TRANSCRIPTOMIC	SINGLE	0	ILLUMINA	Illumina Genome Analyzer IIx	SRP012018	GEO Series accession: GSE36971	0	157353	SRS306767		10090		GSM907700: small RNA from lung tissue in Mouse Strain WSB infected with Flu	SRA051373	public	NO
SRR452407	2012-04-03 10:24:49	20338876	996604924	49	486			ftp://ftp-private.ncbi.nlm.nih.gov/sra/sra-instant/reads/ByRun/sra/SRR/SRR452/SRR452407/SRR452407.sra	SRX134931	GSM907701: small RNA from lung tissue in Mouse Strain WSB Mock	RNA-Seq	cDNA	TRANSCRIPTOMIC	SINGLE	0	ILLUMINA	Illumina Genome Analyzer IIx	SRP012018	GEO Series accession: GSE36971	0	157353	SRS306768		10090		GSM907701: small RNA from lung tissue in Mouse Strain WSB Mock	SRA051373	public	NO
SRR452408	2012-04-03 10:24:49	22665163	1110592987	49	483			ftp://ftp-private.ncbi.nlm.nih.gov/sra/sra-instant/reads/ByRun/sra/SRR/SRR452/SRR452408/SRR452408.sra	SRX134932	GSM907702: small RNA from lung tissue in Mouse Strain PWK infected with Flu	RNA-Seq	cDNA	TRANSCRIPTOMIC	SINGLE	0	ILLUMINA	Illumina Genome Analyzer IIx	SRP012018	GEO Series accession: GSE36971	0	157353	SRS306769		10090		GSM907702: small RNA from lung tissue in Mouse Strain PWK infected with Flu	SRA051373	public	NO
SRR452409	2012-04-03 10:24:49	24311834	1191279866	49	551			ftp://ftp-private.ncbi.nlm.nih.gov/sra/sra-instant/reads/ByRun/sra/SRR/SRR452/SRR452409/SRR452409.sra	SRX134933	GSM907703: small RNA from lung tissue in Mouse Strain PWK Mock	RNA-Seq	cDNA	TRANSCRIPTOMIC	SINGLE	0	ILLUMINA	Illumina Genome Analyzer IIx	SRP012018	GEO Series accession: GSE36971	0	157353	SRS306770		10090		GSM907703: small RNA from lung tissue in Mouse Strain PWK Mock	SRA051373	public	NO
SRR452410	2012-04-03 10:24:49	24131781	1182457269	49	519			ftp://ftp-private.ncbi.nlm.nih.gov/sra/sra-instant/reads/ByRun/sra/SRR/SRR452/SRR452410/SRR452410.sra	SRX134934	GSM907704: small RNA from lung tissue in Mouse Strain Cast infected with Flu	RNA-Seq	cDNA	TRANSCRIPTOMIC	SINGLE	0	ILLUMINA	Illumina Genome Analyzer IIx	SRP012018	GEO Series accession: GSE36971	0	157353	SRS306771		10090		GSM907704: small RNA from lung tissue in Mouse Strain Cast infected with Flu	SRA051373	public	NO
SRR452411	2012-04-03 10:24:49	22829355	1118638395	49	523			ftp://ftp-private.ncbi.nlm.nih.gov/sra/sra-instant/reads/ByRun/sra/SRR/SRR452/SRR452411/SRR452411.sra	SRX134935	GSM907705: small RNA from lung tissue in Mouse Strain Cast Mock	RNA-Seq	cDNA	TRANSCRIPTOMIC	SINGLE	0	ILLUMINA	Illumina Genome Analyzer IIx	SRP012018	GEO Series accession: GSE36971	0	157353	SRS306772		10090		GSM907705: small RNA from lung tissue in Mouse Strain Cast Mock	SRA051373	public	NO
SRR125389	2011-06-23 08:33:16	15394361	554196996	36	5463		unspecified	ftp://ftp-private.ncbi.nlm.nih.gov/sra/sra-instant/reads/ByRun/sra/SRR/SRR125/SRR125389/SRR125389.sra	SRX047695	GSM687304: ES_RNA_a	RNA-Seq	cDNA	TRANSCRIPTOMIC	SINGLE	0	ILLUMINA	Illumina Genome Analyzer II	SRP006003	GEO Series accession: GSE27843	21655081	141893	SRS174590		10090	Mus musculus	Mus musculus	SRA030616	public	YES
SRR125390	2011-06-23 08:33:16	34357532	1305586216	38	8818		unspecified	ftp://ftp-private.ncbi.nlm.nih.gov/sra/sra-instant/reads/ByRun/sra/SRR/SRR125/SRR125390/SRR125390.sra	SRX047696	GSM687305: ES_RNA_b	RNA-Seq	cDNA	TRANSCRIPTOMIC	SINGLE	0	ILLUMINA	Illumina Genome Analyzer II	SRP006003	GEO Series accession: GSE27843	21655081	141893	SRS174591		10090	Mus musculus	Mus musculus	SRA030616	public	YES
SRR125391	2011-06-23 08:33:16	18174104	654267744	36	6643		unspecified	ftp://ftp-private.ncbi.nlm.nih.gov/sra/sra-instant/reads/ByRun/sra/SRR/SRR125/SRR125391/SRR125391.sra	SRX047697	GSM687306: TN_RNA_a	RNA-Seq	cDNA	TRANSCRIPTOMIC	SINGLE	0	ILLUMINA	Illumina Genome Analyzer II	SRP006003	GEO Series accession: GSE27843	21655081	141893	SRS174592		10090	Mus musculus	Mus musculus	SRA030616	public	YES
SRR125392	2011-06-23 08:33:16	37134325	1411104350	38	9554		unspecified	ftp://ftp-private.ncbi.nlm.nih.gov/sra/sra-instant/reads/ByRun/sra/SRR/SRR125/SRR125392/SRR125392.sra	SRX047698	GSM687307: TN_RNA_b	RNA-Seq	cDNA	TRANSCRIPTOMIC	SINGLE	0	ILLUMINA	Illumina Genome Analyzer II	SRP006003	GEO Series accession: GSE27843	21655081	141893	SRS174593		10090	Mus musculus	Mus musculus	SRA030616	public	YES
SRR125393	2011-06-23 08:33:16	37622793	1354420548	36	8873		unspecified	ftp://ftp-private.ncbi.nlm.nih.gov/sra/sra-instant/reads/ByRun/sra/SRR/SRR125/SRR125393/SRR125393.sra	SRX047699	GSM687308: MEF_RNA_a	RNA-Seq	cDNA	TRANSCRIPTOMIC	SINGLE	0	ILLUMINA	Illumina Genome Analyzer II	SRP006003	GEO Series accession: GSE27843	21655081	141893	SRS174594		10090	Mus musculus	Mus musculus	SRA030616	public	YES
SRR125394	2011-06-23 08:33:16	38948873	1402159428	36	9182		unspecified	ftp://ftp-private.ncbi.nlm.nih.gov/sra/sra-instant/reads/ByRun/sra/SRR/SRR125/SRR125394/SRR125394.sra	SRX047700	GSM687309: MEF_RNA_b	RNA-Seq	cDNA	TRANSCRIPTOMIC	SINGLE	0	ILLUMINA	Illumina Genome Analyzer II	SRP006003	GEO Series accession: GSE27843	21655081	141893	SRS174595		10090	Mus musculus	Mus musculus	SRA030616	public	YES
SRR248528	2011-06-08 13:34:06	45431330	3082731878	67	2181		unspecified	ftp://ftp-private.ncbi.nlm.nih.gov/sra/sra-instant/reads/ByRun/sra/SRR/SRR248/SRR248528/SRR248528.sra	SRX072649	GSM737548: debarshi_B6_eye	RNA-Seq	cDNA	TRANSCRIPTOMIC	SINGLE	0	ILLUMINA	Illumina Genome Analyzer IIx	SRP007000	GEO Series accession: GSE29752	21659555	140961	SRS211671		10090		Mus musculus	SRA037735	public	YES
SRR248529	2011-06-08 13:34:07	66643381	3265525669	49	1793		unspecified	ftp://ftp-private.ncbi.nlm.nih.gov/sra/sra-instant/reads/ByRun/sra/SRR/SRR248/SRR248529/SRR248529.sra	SRX072650	GSM737549: debarshi_0525_3-5_eye	RNA-Seq	cDNA	TRANSCRIPTOMIC	SINGLE	0	ILLUMINA	Illumina Genome Analyzer IIx	SRP007000	GEO Series accession: GSE29752	21659555	140961	SRS211672		10090		Mus musculus	SRA037735	public	YES
SRR248530	2011-06-08 13:34:07	85159191	6472098516	76	4470		unspecified	ftp://ftp-private.ncbi.nlm.nih.gov/sra/sra-instant/reads/ByRun/sra/SRR/SRR248/SRR248530/SRR248530.sra	SRX072651	GSM737550: debarshi_111210_retina	RNA-Seq	cDNA	TRANSCRIPTOMIC	SINGLE	0	ILLUMINA	Illumina Genome Analyzer IIx	SRP007000	GEO Series accession: GSE29752	21659555	140961	SRS211673		10090		Mus musculus	SRA037735	public	YES
SRR248531	2011-06-08 13:34:07	104081398	7910186248	76	5445		unspecified	ftp://ftp-private.ncbi.nlm.nih.gov/sra/sra-instant/reads/ByRun/sra/SRR/SRR248/SRR248531/SRR248531.sra	SRX072652	GSM737551: debarshi_1110_retina	RNA-Seq	cDNA	TRANSCRIPTOMIC	SINGLE	0	ILLUMINA	Illumina Genome Analyzer IIx	SRP007000	GEO Series accession: GSE29752	21659555	140961	SRS211674		10090		Mus musculus	SRA037735	public	YES
SRR384977	2012-04-02 14:38:45	20034326	1522608776	76	972			ftp://ftp-private.ncbi.nlm.nih.gov/sra/sra-instant/reads/ByRun/sra/SRR/SRR384/SRR384977/SRR384977.sra	SRX109323	GSM839870: WT library 1	RNA-Seq	cDNA	TRANSCRIPTOMIC	SINGLE	0	ILLUMINA	Illumina Genome Analyzer IIx	SRP009464	GEO Series accession: GSE33979	0	150517	SRS281041		10090		GSM839870: WT library 1	SRA048255	public	YES
SRR384978	2012-04-02 14:38:45	22221706	1688849656	76	1112			ftp://ftp-private.ncbi.nlm.nih.gov/sra/sra-instant/reads/ByRun/sra/SRR/SRR384/SRR384978/SRR384978.sra	SRX109324	GSM839871: WT library 2	RNA-Seq	cDNA	TRANSCRIPTOMIC	SINGLE	0	ILLUMINA	Illumina Genome Analyzer IIx	SRP009464	GEO Series accession: GSE33979	0	150517	SRS281042		10090		GSM839871: WT library 2	SRA048255	public	YES
SRR384979	2012-04-02 14:38:45	45034903	3422652628	76	2119			ftp://ftp-private.ncbi.nlm.nih.gov/sra/sra-instant/reads/ByRun/sra/SRR/SRR384/SRR384979/SRR384979.sra	SRX109325	GSM839872: WT library 3	RNA-Seq	cDNA	TRANSCRIPTOMIC	SINGLE	0	ILLUMINA	Illumina Genome Analyzer IIx	SRP009464	GEO Series accession: GSE33979	0	150517	SRS281043		10090		GSM839872: WT library 3	SRA048255	public	YES
SRR065240	2011-01-03 10:25:41	8726639	296705726	34	316		unspecified	ftp://ftp-private.ncbi.nlm.nih.gov/sra/sra-instant/reads/ByRun/sra/SRR/SRR065/SRR065240/SRR065240.sra	SRX026515	GSM579129: ThioMac-GroSeq-RNA-Seq	RNA-Seq	cDNA	TRANSCRIPTOMIC	SINGLE	0	ILLUMINA	Illumina Genome Analyzer II	SRP003475	GEO Series accession: GSE23619	0	133349	SRS114584		10090	Mus musculus	Mus musculus	SRA023820	public	NO
SRR065241	2011-01-03 10:25:41	8695946	295662164	34	315		unspecified	ftp://ftp-private.ncbi.nlm.nih.gov/sra/sra-instant/reads/ByRun/sra/SRR/SRR065/SRR065241/SRR065241.sra	SRX026516	GSM579130: ThioMac-GroSeq-Kdo2-1h-RNA-Seq	RNA-Seq	cDNA	TRANSCRIPTOMIC	SINGLE	0	ILLUMINA	Illumina Genome Analyzer II	SRP003475	GEO Series accession: GSE23619	0	133349	SRS114585		10090	Mus musculus	Mus musculus	SRA023820	public	NO
SRR315591	2011-11-07 08:23:46	8171580	326863200	40	229		unspecified	ftp://ftp-private.ncbi.nlm.nih.gov/sra/sra-instant/reads/ByRun/sra/SRR/SRR315/SRR315591/SRR315591.sra	SRX084808	GSM765285: embryoid body 8d in low-adhesion dishes w/o LIF 60 s CYH (100 ug/ml) mrna_eb Illumina GAII	RNA-Seq	other	TRANSCRIPTOMIC	SINGLE	0	ILLUMINA	Illumina Genome Analyzer II	SRP007567	GEO Series accession: GSE30839	0	144149	SRS242012		10090		Mus musculus	SRA043500	public	NO
SRR315592	2011-11-07 08:23:46	81314467	3821779949	47	2550		unspecified	ftp://ftp-private.ncbi.nlm.nih.gov/sra/sra-instant/reads/ByRun/sra/SRR/SRR315/SRR315592/SRR315592.sra	SRX084809	GSM765286: embryoid body 8d in low-adhesion dishes w/o LIF 60 s CYH (100 ug/ml) mrna_eb Illumina HiSeq	RNA-Seq	other	TRANSCRIPTOMIC	SINGLE	0	ILLUMINA	Illumina HiSeq 2000	SRP007567	GEO Series accession: GSE30839	0	144149	SRS242013		10090		Mus musculus	SRA043500	public	YES
SRR315593	2011-11-07 08:23:46	10758627	430345080	40	321		unspecified	ftp://ftp-private.ncbi.nlm.nih.gov/sra/sra-instant/reads/ByRun/sra/SRR/SRR315/SRR315593/SRR315593.sra	SRX084810	GSM765287: ES cell 36 hours in low-adhesion dishes w/o LIF 60 s CYH (100 ug/ml) mrna_mesc_nolif Illumina GAII	RNA-Seq	other	TRANSCRIPTOMIC	SINGLE	0	ILLUMINA	Illumina Genome Analyzer II	SRP007567	GEO Series accession: GSE30839	0	144149	SRS242014		10090		Mus musculus	SRA043500	public	YES
SRR315594	2011-11-07 08:23:46	83891817	4194590850	50	2927		unspecified	ftp://ftp-private.ncbi.nlm.nih.gov/sra/sra-instant/reads/ByRun/sra/SRR/SRR315/SRR315594/SRR315594.sra	SRX084811	GSM765288: ES cell 36 hours in low-adhesion dishes w/o LIF 60 s CYH (100 ug/ml) mrna_mesc_nolif Illumina HiSeq	RNA-Seq	other	TRANSCRIPTOMIC	SINGLE	0	ILLUMINA	Illumina HiSeq 2000	SRP007567	GEO Series accession: GSE30839	0	144149	SRS242015		10090		Mus musculus	SRA043500	public	YES
SRR315595	2011-11-07 08:23:46	11763136	470525440	40	349		unspecified	ftp://ftp-private.ncbi.nlm.nih.gov/sra/sra-instant/reads/ByRun/sra/SRR/SRR315/SRR315595/SRR315595.sra	SRX084812	GSM765289: ES cell feeder-free, w/ LIF 60 s CYH (100 ug/ml) mrna_mesc_yeslif Illumina GAII	RNA-Seq	other	TRANSCRIPTOMIC	SINGLE	0	ILLUMINA	Illumina Genome Analyzer II	SRP007567	GEO Series accession: GSE30839	0	144149	SRS242016		10090		Mus musculus	SRA043500	public	YES
SRR315596	2011-11-07 08:23:46	20410585	877655155	43	387		unspecified	ftp://ftp-private.ncbi.nlm.nih.gov/sra/sra-instant/reads/ByRun/sra/SRR/SRR315/SRR315596/SRR315596.sra	SRX084812	GSM765289: ES cell feeder-free, w/ LIF 60 s CYH (100 ug/ml) mrna_mesc_yeslif Illumina GAII	RNA-Seq	other	TRANSCRIPTOMIC	SINGLE	0	ILLUMINA	Illumina Genome Analyzer II	SRP007567	GEO Series accession: GSE30839	0	144149	SRS242016		10090		Mus musculus	SRA043500	public	YES
SRR315597	2011-11-07 08:23:46	10809020	432360800	40	317		unspecified	ftp://ftp-private.ncbi.nlm.nih.gov/sra/sra-instant/reads/ByRun/sra/SRR/SRR315/SRR315597/SRR315597.sra	SRX084813	GSM765290: embryoid body 8d in low-adhesion dishes w/o LIF 60 s CYH (100 ug/ml) ribo_eb Illumina GAII	RNA-Seq	other	TRANSCRIPTOMIC	SINGLE	0	ILLUMINA	Illumina Genome Analyzer II	SRP007567	GEO Series accession: GSE30839	0	144149	SRS242017		10090		Mus musculus	SRA043500	public	NO
SRR315598	2011-11-07 08:23:46	17805861	623205135	35	303		unspecified	ftp://ftp-private.ncbi.nlm.nih.gov/sra/sra-instant/reads/ByRun/sra/SRR/SRR315/SRR315598/SRR315598.sra	SRX084813	GSM765290: embryoid body 8d in low-adhesion dishes w/o LIF 60 s CYH (100 ug/ml) ribo_eb Illumina GAII	RNA-Seq	other	TRANSCRIPTOMIC	SINGLE	0	ILLUMINA	Illumina Genome Analyzer II	SRP007567	GEO Series accession: GSE30839	0	144149	SRS242017		10090		Mus musculus	SRA043500	public	NO
SRR315599	2011-11-07 08:23:46	14087578	563503120	40	266		unspecified	ftp://ftp-private.ncbi.nlm.nih.gov/sra/sra-instant/reads/ByRun/sra/SRR/SRR315/SRR315599/SRR315599.sra	SRX084813	GSM765290: embryoid body 8d in low-adhesion dishes w/o LIF 60 s CYH (100 ug/ml) ribo_eb Illumina GAII	RNA-Seq	other	TRANSCRIPTOMIC	SINGLE	0	ILLUMINA	Illumina Genome Analyzer II	SRP007567	GEO Series accession: GSE30839	0	144149	SRS242017		10090		Mus musculus	SRA043500	public	NO
SRR315600	2011-11-07 08:23:46	75080024	3528761128	47	2431		unspecified	ftp://ftp-private.ncbi.nlm.nih.gov/sra/sra-instant/reads/ByRun/sra/SRR/SRR315/SRR315600/SRR315600.sra	SRX084814	GSM765291: embryoid body 8d in low-adhesion dishes w/o LIF 60 s CYH (100 ug/ml) ribo_eb Illumina HiSeq	RNA-Seq	other	TRANSCRIPTOMIC	SINGLE	0	ILLUMINA	Illumina HiSeq 2000	SRP007567	GEO Series accession: GSE30839	0	144149	SRS242018		10090		Mus musculus	SRA043500	public	NO
SRR315601	2011-11-07 08:23:46	17915072	716602880	40	391		unspecified	ftp://ftp-private.ncbi.nlm.nih.gov/sra/sra-instant/reads/ByRun/sra/SRR/SRR315/SRR315601/SRR315601.sra	SRX084815	GSM765292: ES cell feeder-free, w/ LIF 60 s CYH (100 ug/ml) ribo_mesc_chx Illumina GAII	RNA-Seq	other	TRANSCRIPTOMIC	SINGLE	0	ILLUMINA	Illumina Genome Analyzer II	SRP007567	GEO Series accession: GSE30839	0	144149	SRS242019		10090		Mus musculus	SRA043500	public	NO
SRR315602	2011-11-07 08:23:46	24497475	979899000	40	668		unspecified	ftp://ftp-private.ncbi.nlm.nih.gov/sra/sra-instant/reads/ByRun/sra/SRR/SRR315/SRR315602/SRR315602.sra	SRX084815	GSM765292: ES cell feeder-free, w/ LIF 60 s CYH (100 ug/ml) ribo_mesc_chx Illumina GAII	RNA-Seq	other	TRANSCRIPTOMIC	SINGLE	0	ILLUMINA	Illumina Genome Analyzer II	SRP007567	GEO Series accession: GSE30839	0	144149	SRS242019		10090		Mus musculus	SRA043500	public	NO
SRR315603	2011-11-07 08:23:46	19226418	769056720	40	408		unspecified	ftp://ftp-private.ncbi.nlm.nih.gov/sra/sra-instant/reads/ByRun/sra/SRR/SRR315/SRR315603/SRR315603.sra	SRX084816	GSM765293: ES cell feeder-free, w/ LIF 60 s emetine ribo_mesc_emet Illumina GAII	RNA-Seq	other	TRANSCRIPTOMIC	SINGLE	0	ILLUMINA	Illumina Genome Analyzer II	SRP007567	GEO Series accession: GSE30839	0	144149	SRS242020		10090		Mus musculus	SRA043500	public	NO
SRR315604	2011-11-07 08:23:46	16889537	675581480	40	436		unspecified	ftp://ftp-private.ncbi.nlm.nih.gov/sra/sra-instant/reads/ByRun/sra/SRR/SRR315/SRR315604/SRR315604.sra	SRX084817	GSM765294: ES cell feeder-free, w/ LIF 120 s HRT (1 ug/ml) then 60 s CYH (100 ug/ml) ribo_mesc_harr120s Illumina GAII	RNA-Seq	other	TRANSCRIPTOMIC	SINGLE	0	ILLUMINA	Illumina Genome Analyzer II	SRP007567	GEO Series accession: GSE30839	0	144149	SRS242021		10090		Mus musculus	SRA043500	public	NO
SRR315605	2011-11-07 08:23:46	16714382	668575280	40	506		unspecified	ftp://ftp-private.ncbi.nlm.nih.gov/sra/sra-instant/reads/ByRun/sra/SRR/SRR315/SRR315605/SRR315605.sra	SRX084817	GSM765294: ES cell feeder-free, w/ LIF 120 s HRT (1 ug/ml) then 60 s CYH (100 ug/ml) ribo_mesc_harr120s Illumina GAII	RNA-Seq	other	TRANSCRIPTOMIC	SINGLE	0	ILLUMINA	Illumina Genome Analyzer II	SRP007567	GEO Series accession: GSE30839	0	144149	SRS242021		10090		Mus musculus	SRA043500	public	NO
SRR315606	2011-11-07 08:23:46	16775797	671031880	40	507		unspecified	ftp://ftp-private.ncbi.nlm.nih.gov/sra/sra-instant/reads/ByRun/sra/SRR/SRR315/SRR315606/SRR315606.sra	SRX084817	GSM765294: ES cell feeder-free, w/ LIF 120 s HRT (1 ug/ml) then 60 s CYH (100 ug/ml) ribo_mesc_harr120s Illumina GAII	RNA-Seq	other	TRANSCRIPTOMIC	SINGLE	0	ILLUMINA	Illumina Genome Analyzer II	SRP007567	GEO Series accession: GSE30839	0	144149	SRS242021		10090		Mus musculus	SRA043500	public	NO
SRR315607	2011-11-07 08:23:46	17086206	683448240	40	429		unspecified	ftp://ftp-private.ncbi.nlm.nih.gov/sra/sra-instant/reads/ByRun/sra/SRR/SRR315/SRR315607/SRR315607.sra	SRX084818	GSM765295: ES cell feeder-free, w/ LIF 150 s HRT (1 ug/ml) then 60 s CYH (100 ug/ml) ribo_mesc_harr150s Illumina GAII	RNA-Seq	other	TRANSCRIPTOMIC	SINGLE	0	ILLUMINA	Illumina Genome Analyzer II	SRP007567	GEO Series accession: GSE30839	0	144149	SRS242022		10090		Mus musculus	SRA043500	public	NO
SRR315608	2011-11-07 08:23:46	20544504	821780160	40	526		unspecified	ftp://ftp-private.ncbi.nlm.nih.gov/sra/sra-instant/reads/ByRun/sra/SRR/SRR315/SRR315608/SRR315608.sra	SRX084818	GSM765295: ES cell feeder-free, w/ LIF 150 s HRT (1 ug/ml) then 60 s CYH (100 ug/ml) ribo_mesc_harr150s Illumina GAII	RNA-Seq	other	TRANSCRIPTOMIC	SINGLE	0	ILLUMINA	Illumina Genome Analyzer II	SRP007567	GEO Series accession: GSE30839	0	144149	SRS242022		10090		Mus musculus	SRA043500	public	NO
SRR315609	2011-11-07 08:23:46	17103202	684128080	40	504		unspecified	ftp://ftp-private.ncbi.nlm.nih.gov/sra/sra-instant/reads/ByRun/sra/SRR/SRR315/SRR315609/SRR315609.sra	SRX084818	GSM765295: ES cell feeder-free, w/ LIF 150 s HRT (1 ug/ml) then 60 s CYH (100 ug/ml) ribo_mesc_harr150s Illumina GAII	RNA-Seq	other	TRANSCRIPTOMIC	SINGLE	0	ILLUMINA	Illumina Genome Analyzer II	SRP007567	GEO Series accession: GSE30839	0	144149	SRS242022		10090		Mus musculus	SRA043500	public	NO
SRR315610	2011-11-07 08:23:46	14364423	574576920	40	440		unspecified	ftp://ftp-private.ncbi.nlm.nih.gov/sra/sra-instant/reads/ByRun/sra/SRR/SRR315/SRR315610/SRR315610.sra	SRX084819	GSM765296: ES cell feeder-free, w/ LIF 180 s HRT (0.5 ug/ml) then 60 s CYH (100 ug/ml) ribo_mesc_harr180s Illumina GAII	RNA-Seq	other	TRANSCRIPTOMIC	SINGLE	0	ILLUMINA	Illumina Genome Analyzer II	SRP007567	GEO Series accession: GSE30839	0	144149	SRS242023		10090		Mus musculus	SRA043500	public	NO
SRR315611	2011-11-07 08:23:46	14423793	576951720	40	440		unspecified	ftp://ftp-private.ncbi.nlm.nih.gov/sra/sra-instant/reads/ByRun/sra/SRR/SRR315/SRR315611/SRR315611.sra	SRX084819	GSM765296: ES cell feeder-free, w/ LIF 180 s HRT (0.5 ug/ml) then 60 s CYH (100 ug/ml) ribo_mesc_harr180s Illumina GAII	RNA-Seq	other	TRANSCRIPTOMIC	SINGLE	0	ILLUMINA	Illumina Genome Analyzer II	SRP007567	GEO Series accession: GSE30839	0	144149	SRS242023		10090		Mus musculus	SRA043500	public	NO
SRR315612	2011-11-07 08:23:46	15697206	627888240	40	399		unspecified	ftp://ftp-private.ncbi.nlm.nih.gov/sra/sra-instant/reads/ByRun/sra/SRR/SRR315/SRR315612/SRR315612.sra	SRX084820	GSM765297: ES cell feeder-free, w/ LIF 90 s HRT (1 ug/ml) then 60 s CYH (100 ug/ul) ribo_mesc_harr90s Illumina GAII	RNA-Seq	other	TRANSCRIPTOMIC	SINGLE	0	ILLUMINA	Illumina Genome Analyzer II	SRP007567	GEO Series accession: GSE30839	0	144149	SRS242024		10090		Mus musculus	SRA043500	public	NO
SRR315613	2011-11-07 08:23:46	19877909	795116360	40	498		unspecified	ftp://ftp-private.ncbi.nlm.nih.gov/sra/sra-instant/reads/ByRun/sra/SRR/SRR315/SRR315613/SRR315613.sra	SRX084820	GSM765297: ES cell feeder-free, w/ LIF 90 s HRT (1 ug/ml) then 60 s CYH (100 ug/ul) ribo_mesc_harr90s Illumina GAII	RNA-Seq	other	TRANSCRIPTOMIC	SINGLE	0	ILLUMINA	Illumina Genome Analyzer II	SRP007567	GEO Series accession: GSE30839	0	144149	SRS242024		10090		Mus musculus	SRA043500	public	NO
SRR315614	2011-11-07 08:23:46	22292861	891714440	40	590		unspecified	ftp://ftp-private.ncbi.nlm.nih.gov/sra/sra-instant/reads/ByRun/sra/SRR/SRR315/SRR315614/SRR315614.sra	SRX084820	GSM765297: ES cell feeder-free, w/ LIF 90 s HRT (1 ug/ml) then 60 s CYH (100 ug/ul) ribo_mesc_harr90s Illumina GAII	RNA-Seq	other	TRANSCRIPTOMIC	SINGLE	0	ILLUMINA	Illumina Genome Analyzer II	SRP007567	GEO Series accession: GSE30839	0	144149	SRS242024		10090		Mus musculus	SRA043500	public	NO
SRR315615	2011-11-07 08:23:46	16391233	655649320	40	488		unspecified	ftp://ftp-private.ncbi.nlm.nih.gov/sra/sra-instant/reads/ByRun/sra/SRR/SRR315/SRR315615/SRR315615.sra	SRX084820	GSM765297: ES cell feeder-free, w/ LIF 90 s HRT (1 ug/ml) then 60 s CYH (100 ug/ul) ribo_mesc_harr90s Illumina GAII	RNA-Seq	other	TRANSCRIPTOMIC	SINGLE	0	ILLUMINA	Illumina Genome Analyzer II	SRP007567	GEO Series accession: GSE30839	0	144149	SRS242024		10090		Mus musculus	SRA043500	public	NO
SRR315616	2011-11-07 08:23:46	19449857	777994280	40	406		unspecified	ftp://ftp-private.ncbi.nlm.nih.gov/sra/sra-instant/reads/ByRun/sra/SRR/SRR315/SRR315616/SRR315616.sra	SRX084821	GSM765298: ES cell feeder-free, w/ LIF none ribo_mesc_nochx Illumina GAII	RNA-Seq	other	TRANSCRIPTOMIC	SINGLE	0	ILLUMINA	Illumina Genome Analyzer II	SRP007567	GEO Series accession: GSE30839	0	144149	SRS242025		10090		Mus musculus	SRA043500	public	NO
SRR315617	2011-11-07 08:23:46	24822364	992894560	40	694		unspecified	ftp://ftp-private.ncbi.nlm.nih.gov/sra/sra-instant/reads/ByRun/sra/SRR/SRR315/SRR315617/SRR315617.sra	SRX084821	GSM765298: ES cell feeder-free, w/ LIF none ribo_mesc_nochx Illumina GAII	RNA-Seq	other	TRANSCRIPTOMIC	SINGLE	0	ILLUMINA	Illumina Genome Analyzer II	SRP007567	GEO Series accession: GSE30839	0	144149	SRS242025		10090		Mus musculus	SRA043500	public	NO
SRR315618	2011-11-07 08:23:46	25726565	1029062600	40	726		unspecified	ftp://ftp-private.ncbi.nlm.nih.gov/sra/sra-instant/reads/ByRun/sra/SRR/SRR315/SRR315618/SRR315618.sra	SRX084821	GSM765298: ES cell feeder-free, w/ LIF none ribo_mesc_nochx Illumina GAII	RNA-Seq	other	TRANSCRIPTOMIC	SINGLE	0	ILLUMINA	Illumina Genome Analyzer II	SRP007567	GEO Series accession: GSE30839	0	144149	SRS242025		10090		Mus musculus	SRA043500	public	NO
SRR315619	2011-11-07 08:23:46	25600179	1024007160	40	728		unspecified	ftp://ftp-private.ncbi.nlm.nih.gov/sra/sra-instant/reads/ByRun/sra/SRR/SRR315/SRR315619/SRR315619.sra	SRX084821	GSM765298: ES cell feeder-free, w/ LIF none ribo_mesc_nochx Illumina GAII	RNA-Seq	other	TRANSCRIPTOMIC	SINGLE	0	ILLUMINA	Illumina Genome Analyzer II	SRP007567	GEO Series accession: GSE30839	0	144149	SRS242025		10090		Mus musculus	SRA043500	public	NO
SRR315620	2011-11-07 08:23:46	11418377	456735080	40	347		unspecified	ftp://ftp-private.ncbi.nlm.nih.gov/sra/sra-instant/reads/ByRun/sra/SRR/SRR315/SRR315620/SRR315620.sra	SRX084822	GSM765299: ES cell 36 hours in low-adhesion dishes w/o LIF 60 s CYH (100 ug/ml) ribo_mesc_nolif Illumina GAII	RNA-Seq	other	TRANSCRIPTOMIC	SINGLE	0	ILLUMINA	Illumina Genome Analyzer II	SRP007567	GEO Series accession: GSE30839	0	144149	SRS242026		10090		Mus musculus	SRA043500	public	NO
SRR315621	2011-11-07 08:23:46	19727446	789097840	40	387		unspecified	ftp://ftp-private.ncbi.nlm.nih.gov/sra/sra-instant/reads/ByRun/sra/SRR/SRR315/SRR315621/SRR315621.sra	SRX084822	GSM765299: ES cell 36 hours in low-adhesion dishes w/o LIF 60 s CYH (100 ug/ml) ribo_mesc_nolif Illumina GAII	RNA-Seq	other	TRANSCRIPTOMIC	SINGLE	0	ILLUMINA	Illumina Genome Analyzer II	SRP007567	GEO Series accession: GSE30839	0	144149	SRS242026		10090		Mus musculus	SRA043500	public	NO
SRR315622	2011-11-07 08:23:46	19029625	761185000	40	380		unspecified	ftp://ftp-private.ncbi.nlm.nih.gov/sra/sra-instant/reads/ByRun/sra/SRR/SRR315/SRR315622/SRR315622.sra	SRX084822	GSM765299: ES cell 36 hours in low-adhesion dishes w/o LIF 60 s CYH (100 ug/ml) ribo_mesc_nolif Illumina GAII	RNA-Seq	other	TRANSCRIPTOMIC	SINGLE	0	ILLUMINA	Illumina Genome Analyzer II	SRP007567	GEO Series accession: GSE30839	0	144149	SRS242026		10090		Mus musculus	SRA043500	public	NO
SRR315623	2011-11-07 08:23:46	77904761	3895238050	50	2726		unspecified	ftp://ftp-private.ncbi.nlm.nih.gov/sra/sra-instant/reads/ByRun/sra/SRR/SRR315/SRR315623/SRR315623.sra	SRX084823	GSM765300: ES cell 36 hours in low-adhesion dishes w/o LIF 60 s CYH (100 ug/ml) ribo_mesc_nolif Illumina HiSeq	RNA-Seq	other	TRANSCRIPTOMIC	SINGLE	0	ILLUMINA	Illumina HiSeq 2000	SRP007567	GEO Series accession: GSE30839	0	144149	SRS242027		10090		Mus musculus	SRA043500	public	NO
SRR315624	2011-11-07 08:23:46	11036184	441447360	40	335		unspecified	ftp://ftp-private.ncbi.nlm.nih.gov/sra/sra-instant/reads/ByRun/sra/SRR/SRR315/SRR315624/SRR315624.sra	SRX084824	GSM765301: ES cell feeder-free, w/ LIF 60 s CYH (100 ug/ml) ribo_mesc_yeslif Illumina GAII	RNA-Seq	other	TRANSCRIPTOMIC	SINGLE	0	ILLUMINA	Illumina Genome Analyzer II	SRP007567	GEO Series accession: GSE30839	0	144149	SRS242028		10090		Mus musculus	SRA043500	public	NO
SRR315625	2011-11-07 08:23:46	17257062	603997170	35	303		unspecified	ftp://ftp-private.ncbi.nlm.nih.gov/sra/sra-instant/reads/ByRun/sra/SRR/SRR315/SRR315625/SRR315625.sra	SRX084824	GSM765301: ES cell feeder-free, w/ LIF 60 s CYH (100 ug/ml) ribo_mesc_yeslif Illumina GAII	RNA-Seq	other	TRANSCRIPTOMIC	SINGLE	0	ILLUMINA	Illumina Genome Analyzer II	SRP007567	GEO Series accession: GSE30839	0	144149	SRS242028		10090		Mus musculus	SRA043500	public	NO
SRR315626	2011-11-07 08:23:46	17326228	693049120	40	340		unspecified	ftp://ftp-private.ncbi.nlm.nih.gov/sra/sra-instant/reads/ByRun/sra/SRR/SRR315/SRR315626/SRR315626.sra	SRX084824	GSM765301: ES cell feeder-free, w/ LIF 60 s CYH (100 ug/ml) ribo_mesc_yeslif Illumina GAII	RNA-Seq	other	TRANSCRIPTOMIC	SINGLE	0	ILLUMINA	Illumina Genome Analyzer II	SRP007567	GEO Series accession: GSE30839	0	144149	SRS242028		10090		Mus musculus	SRA043500	public	NO
SRR315627	2011-11-07 08:23:46	76656433	3602852351	47	2533		unspecified	ftp://ftp-private.ncbi.nlm.nih.gov/sra/sra-instant/reads/ByRun/sra/SRR/SRR315/SRR315627/SRR315627.sra	SRX084825	GSM765302: ES cell feeder-free, w/ LIF 60 s CYH (100 ug/ml) ribo_mesc_yeslif Illumina HiSeq	RNA-Seq	other	TRANSCRIPTOMIC	SINGLE	0	ILLUMINA	Illumina HiSeq 2000	SRP007567	GEO Series accession: GSE30839	0	144149	SRS242029		10090		Mus musculus	SRA043500	public	NO
SRR363972	2012-02-16 08:35:49	86014617	17374952634	202	10125		unspecified	ftp://ftp-private.ncbi.nlm.nih.gov/sra/sra-instant/reads/ByRun/sra/SRR/SRR363/SRR363972/SRR363972.sra	SRX105287	GSM828675: mouse siCtr	RNA-Seq	other	TRANSCRIPTOMIC	PAIRED	250	ILLUMINA	Illumina HiSeq 2000	SRP009272	GEO Series accession: GSE33497	0	148851	SRS270130		10090		Mus musculus	SRA047993	public	YES
SRR363973	2012-02-16 08:35:49	90625898	18306431396	202	10539		unspecified	ftp://ftp-private.ncbi.nlm.nih.gov/sra/sra-instant/reads/ByRun/sra/SRR/SRR363/SRR363973/SRR363973.sra	SRX105289	GSM828676: mouse siSupt4h	RNA-Seq	other	TRANSCRIPTOMIC	PAIRED	250	ILLUMINA	Illumina HiSeq 2000	SRP009272	GEO Series accession: GSE33497	0	148851	SRS270131		10090		Mus musculus	SRA047993	public	YES
SRR397565	2012-04-02 14:39:12	57623122	5762312200	100	3671			ftp://ftp-private.ncbi.nlm.nih.gov/sra/sra-instant/reads/ByRun/sra/SRR/SRR397/SRR397565/SRR397565.sra	SRX115010	GSM857324: MRC1+TAMs_001	RNA-Seq	cDNA	TRANSCRIPTOMIC	PAIRED	300	ILLUMINA	Illumina HiSeq 2000	SRP010190	GEO Series accession: GSE34903	0	150173	SRS285367		10090		GSM857324: MRC1+TAMs_001	SRA049107	public	YES
SRR397566	2012-04-02 14:39:12	48722329	4872232900	100	2970			ftp://ftp-private.ncbi.nlm.nih.gov/sra/sra-instant/reads/ByRun/sra/SRR/SRR397/SRR397566/SRR397566.sra	SRX115011	GSM857325: MRC1+TAMs_002	RNA-Seq	cDNA	TRANSCRIPTOMIC	PAIRED	300	ILLUMINA	Illumina HiSeq 2000	SRP010190	GEO Series accession: GSE34903	0	150173	SRS285368		10090		GSM857325: MRC1+TAMs_002	SRA049107	public	YES
SRR397567	2012-04-02 14:39:12	44401995	4440199500	100	2620			ftp://ftp-private.ncbi.nlm.nih.gov/sra/sra-instant/reads/ByRun/sra/SRR/SRR397/SRR397567/SRR397567.sra	SRX115012	GSM857326: MRC1+TAMs_003	RNA-Seq	cDNA	TRANSCRIPTOMIC	PAIRED	300	ILLUMINA	Illumina HiSeq 2000	SRP010190	GEO Series accession: GSE34903	0	150173	SRS285369		10090		GSM857326: MRC1+TAMs_003	SRA049107	public	YES
SRR397568	2012-04-02 14:39:12	44685579	4468557900	100	2819			ftp://ftp-private.ncbi.nlm.nih.gov/sra/sra-instant/reads/ByRun/sra/SRR/SRR397/SRR397568/SRR397568.sra	SRX115013	GSM857327: CD11c+TAMs_001	RNA-Seq	cDNA	TRANSCRIPTOMIC	PAIRED	300	ILLUMINA	Illumina HiSeq 2000	SRP010190	GEO Series accession: GSE34903	0	150173	SRS285370		10090		GSM857327: CD11c+TAMs_001	SRA049107	public	YES
SRR397569	2012-04-02 14:39:12	49894967	4989496700	100	3030			ftp://ftp-private.ncbi.nlm.nih.gov/sra/sra-instant/reads/ByRun/sra/SRR/SRR397/SRR397569/SRR397569.sra	SRX115014	GSM857328: CD11c+TAMs_002	RNA-Seq	cDNA	TRANSCRIPTOMIC	PAIRED	300	ILLUMINA	Illumina HiSeq 2000	SRP010190	GEO Series accession: GSE34903	0	150173	SRS285371		10090		GSM857328: CD11c+TAMs_002	SRA049107	public	YES
SRR397570	2012-04-02 14:39:12	44969839	4496983900	100	2663			ftp://ftp-private.ncbi.nlm.nih.gov/sra/sra-instant/reads/ByRun/sra/SRR/SRR397/SRR397570/SRR397570.sra	SRX115015	GSM857329: CD11c+TAMs_003	RNA-Seq	cDNA	TRANSCRIPTOMIC	PAIRED	300	ILLUMINA	Illumina HiSeq 2000	SRP010190	GEO Series accession: GSE34903	0	150173	SRS285372		10090		GSM857329: CD11c+TAMs_003	SRA049107	public	YES
SRR397571	2012-04-02 14:39:12	34303996	6860799200	200	3830			ftp://ftp-private.ncbi.nlm.nih.gov/sra/sra-instant/reads/ByRun/sra/SRR/SRR397/SRR397571/SRR397571.sra	SRX115016	GSM857330: SFFV.miR-511-3p_TAMs_001	RNA-Seq	cDNA	TRANSCRIPTOMIC	PAIRED	215	ILLUMINA	Illumina HiSeq 2000	SRP010190	GEO Series accession: GSE34903	0	150173	SRS285373		10090		GSM857330: SFFV.miR-511-3p_TAMs_001	SRA049107	public	YES
SRR397572	2012-04-02 14:39:12	40339732	8067946400	200	4529			ftp://ftp-private.ncbi.nlm.nih.gov/sra/sra-instant/reads/ByRun/sra/SRR/SRR397/SRR397572/SRR397572.sra	SRX115017	GSM857331: SFFV.miR-511-3p_TAMs_002	RNA-Seq	cDNA	TRANSCRIPTOMIC	PAIRED	215	ILLUMINA	Illumina HiSeq 2000	SRP010190	GEO Series accession: GSE34903	0	150173	SRS285374		10090		GSM857331: SFFV.miR-511-3p_TAMs_002	SRA049107	public	YES
SRR397573	2012-04-02 14:39:12	38841822	7768364400	200	4334			ftp://ftp-private.ncbi.nlm.nih.gov/sra/sra-instant/reads/ByRun/sra/SRR/SRR397/SRR397573/SRR397573.sra	SRX115018	GSM857332: SFFV.miR-511-3p_TAMs_003	RNA-Seq	cDNA	TRANSCRIPTOMIC	PAIRED	215	ILLUMINA	Illumina HiSeq 2000	SRP010190	GEO Series accession: GSE34903	0	150173	SRS285375		10090		GSM857332: SFFV.miR-511-3p_TAMs_003	SRA049107	public	YES
SRR397574	2012-04-02 14:39:12	42120067	8424013400	200	4690			ftp://ftp-private.ncbi.nlm.nih.gov/sra/sra-instant/reads/ByRun/sra/SRR/SRR397/SRR397574/SRR397574.sra	SRX115019	GSM857333: SFFV.miR-511-3p-mut_TAMs_001	RNA-Seq	cDNA	TRANSCRIPTOMIC	PAIRED	215	ILLUMINA	Illumina HiSeq 2000	SRP010190	GEO Series accession: GSE34903	0	150173	SRS285376		10090		GSM857333: SFFV.miR-511-3p-mut_TAMs_001	SRA049107	public	YES
SRR397575	2012-04-02 14:39:12	35370107	7074021400	200	3959			ftp://ftp-private.ncbi.nlm.nih.gov/sra/sra-instant/reads/ByRun/sra/SRR/SRR397/SRR397575/SRR397575.sra	SRX115020	GSM857334: SFFV.miR-511-3p-mut_TAMs_002	RNA-Seq	cDNA	TRANSCRIPTOMIC	PAIRED	215	ILLUMINA	Illumina HiSeq 2000	SRP010190	GEO Series accession: GSE34903	0	150173	SRS285377		10090		GSM857334: SFFV.miR-511-3p-mut_TAMs_002	SRA049107	public	YES
SRR397576	2012-04-02 14:39:12	35161813	7032362600	200	3908			ftp://ftp-private.ncbi.nlm.nih.gov/sra/sra-instant/reads/ByRun/sra/SRR/SRR397/SRR397576/SRR397576.sra	SRX115021	GSM857335: SFFV.miR-511-3p-mut_TAMs_003	RNA-Seq	cDNA	TRANSCRIPTOMIC	PAIRED	215	ILLUMINA	Illumina HiSeq 2000	SRP010190	GEO Series accession: GSE34903	0	150173	SRS285378		10090		GSM857335: SFFV.miR-511-3p-mut_TAMs_003	SRA049107	public	YES
SRR402761	2012-03-01 13:11:12	8375905	418795250	50	235			ftp://ftp-private.ncbi.nlm.nih.gov/sra/sra-instant/reads/ByRun/sra/SRR/SRR402/SRR402761/SRR402761.sra	SRX117944	GSM866983: ES_XY_Solexa_i_IDT	RNA-Seq	cDNA	TRANSCRIPTOMIC	SINGLE	0	ILLUMINA	Illumina HiSeq 2000	SRP010603	GEO Series accession: GSE35368	0	152595	SRS290413		10090		GSM866983: ES_XY_Solexa_i_IDT	SRA049663	public	NO
SRR402762	2012-03-01 13:11:12	31316082	1691068428	54	1144			ftp://ftp-private.ncbi.nlm.nih.gov/sra/sra-instant/reads/ByRun/sra/SRR/SRR402/SRR402762/SRR402762.sra	SRX117945	GSM866984: ES_XY_Solexa_IDT	RNA-Seq	cDNA	TRANSCRIPTOMIC	SINGLE	0	ILLUMINA	Illumina Genome Analyzer IIx	SRP010603	GEO Series accession: GSE35368	0	152595	SRS290414		10090		GSM866984: ES_XY_Solexa_IDT	SRA049663	public	NO
SRR404089	2012-02-09 09:32:38	35104272	3545531472	101	2215			ftp://ftp-private.ncbi.nlm.nih.gov/sra/sra-instant/reads/ByRun/sra/SRR/SRR404/SRR404089/SRR404089.sra	SRX118412	GSM869994: iMN-ESCs without Dox treatment, rep1	RNA-Seq	cDNA	TRANSCRIPTOMIC	SINGLE	0	ILLUMINA	Illumina HiSeq 2000	SRP010724	GEO Series accession: GSE35510	0	152319	SRS291120		10090		GSM869994: iMN-ESCs without Dox treatment, rep1	SRA049831	public	YES
SRR404090	2012-02-09 09:32:38	46866561	4733522661	101	2961			ftp://ftp-private.ncbi.nlm.nih.gov/sra/sra-instant/reads/ByRun/sra/SRR/SRR404/SRR404090/SRR404090.sra	SRX118413	GSM869995: iMN-ESCs with Dox treatment, rep1	RNA-Seq	cDNA	TRANSCRIPTOMIC	SINGLE	0	ILLUMINA	Illumina HiSeq 2000	SRP010724	GEO Series accession: GSE35510	0	152319	SRS291121		10090		GSM869995: iMN-ESCs with Dox treatment, rep1	SRA049831	public	YES
SRR404091	2012-02-09 09:32:38	32043436	3236387036	101	2038			ftp://ftp-private.ncbi.nlm.nih.gov/sra/sra-instant/reads/ByRun/sra/SRR/SRR404/SRR404091/SRR404091.sra	SRX118414	GSM869996: iMN-ESCs without Dox treatment, rep2	RNA-Seq	cDNA	TRANSCRIPTOMIC	SINGLE	0	ILLUMINA	Illumina HiSeq 2000	SRP010724	GEO Series accession: GSE35510	0	152319	SRS291122		10090		GSM869996: iMN-ESCs without Dox treatment, rep2	SRA049831	public	YES
SRR404092	2012-02-09 09:32:38	71068068	7177874868	101	4447			ftp://ftp-private.ncbi.nlm.nih.gov/sra/sra-instant/reads/ByRun/sra/SRR/SRR404/SRR404092/SRR404092.sra	SRX118415	GSM869997: iMN-ESCs with Dox treatment, rep2	RNA-Seq	cDNA	TRANSCRIPTOMIC	SINGLE	0	ILLUMINA	Illumina HiSeq 2000	SRP010724	GEO Series accession: GSE35510	0	152319	SRS291123		10090		GSM869997: iMN-ESCs with Dox treatment, rep2	SRA049831	public	YES
SRR413520	2012-02-27 09:48:49	21605570	1642023320	76	1054			ftp://ftp-private.ncbi.nlm.nih.gov/sra/sra-instant/reads/ByRun/sra/SRR/SRR413/SRR413520/SRR413520.sra	SRX121897	GSM879798: Endogenous mRNA from MEF wildtype cells 1	RNA-Seq	cDNA	TRANSCRIPTOMIC	SINGLE	0	ILLUMINA	Illumina Genome Analyzer IIx	SRP011038	GEO Series accession: GSE36041	0	151765	SRS295116		10090		GSM879798: Endogenous mRNA from MEF wildtype cells 1	SRA050265	public	YES
SRR413521	2012-02-27 09:48:49	20399817	1550386092	76	1035			ftp://ftp-private.ncbi.nlm.nih.gov/sra/sra-instant/reads/ByRun/sra/SRR/SRR413/SRR413521/SRR413521.sra	SRX121897	GSM879798: Endogenous mRNA from MEF wildtype cells 1	RNA-Seq	cDNA	TRANSCRIPTOMIC	SINGLE	0	ILLUMINA	Illumina Genome Analyzer IIx	SRP011038	GEO Series accession: GSE36041	0	151765	SRS295116		10090		GSM879798: Endogenous mRNA from MEF wildtype cells 1	SRA050265	public	YES
SRR413522	2012-02-27 09:48:49	21229840	1613467840	76	1020			ftp://ftp-private.ncbi.nlm.nih.gov/sra/sra-instant/reads/ByRun/sra/SRR/SRR413/SRR413522/SRR413522.sra	SRX121898	GSM879799: Endogenous mRNA from MEF irs1-/- knockout cells 1	RNA-Seq	cDNA	TRANSCRIPTOMIC	SINGLE	0	ILLUMINA	Illumina Genome Analyzer IIx	SRP011038	GEO Series accession: GSE36041	0	151765	SRS295117		10090		GSM879799: Endogenous mRNA from MEF irs1-/- knockout cells 1	SRA050265	public	YES
SRR413523	2012-02-27 09:48:49	23793774	1808326824	76	1179			ftp://ftp-private.ncbi.nlm.nih.gov/sra/sra-instant/reads/ByRun/sra/SRR/SRR413/SRR413523/SRR413523.sra	SRX121898	GSM879799: Endogenous mRNA from MEF irs1-/- knockout cells 1	RNA-Seq	cDNA	TRANSCRIPTOMIC	SINGLE	0	ILLUMINA	Illumina Genome Analyzer IIx	SRP011038	GEO Series accession: GSE36041	0	151765	SRS295117		10090		GSM879799: Endogenous mRNA from MEF irs1-/- knockout cells 1	SRA050265	public	YES
SRR413524	2012-02-27 09:48:49	20703289	1573449964	76	1000			ftp://ftp-private.ncbi.nlm.nih.gov/sra/sra-instant/reads/ByRun/sra/SRR/SRR413/SRR413524/SRR413524.sra	SRX121899	GSM879800: Endogenous mRNA from MEF wildtype cells 2	RNA-Seq	cDNA	TRANSCRIPTOMIC	SINGLE	0	ILLUMINA	Illumina Genome Analyzer IIx	SRP011038	GEO Series accession: GSE36041	0	151765	SRS295118		10090		GSM879800: Endogenous mRNA from MEF wildtype cells 2	SRA050265	public	YES
SRR413525	2012-02-27 09:48:49	21826568	1658819168	76	1106			ftp://ftp-private.ncbi.nlm.nih.gov/sra/sra-instant/reads/ByRun/sra/SRR/SRR413/SRR413525/SRR413525.sra	SRX121899	GSM879800: Endogenous mRNA from MEF wildtype cells 2	RNA-Seq	cDNA	TRANSCRIPTOMIC	SINGLE	0	ILLUMINA	Illumina Genome Analyzer IIx	SRP011038	GEO Series accession: GSE36041	0	151765	SRS295118		10090		GSM879800: Endogenous mRNA from MEF wildtype cells 2	SRA050265	public	YES
SRR413526	2012-02-27 09:48:49	18026935	1370047060	76	862			ftp://ftp-private.ncbi.nlm.nih.gov/sra/sra-instant/reads/ByRun/sra/SRR/SRR413/SRR413526/SRR413526.sra	SRX121900	GSM879801: Endogenous mRNA from MEF irs1-/- knockout cells 2	RNA-Seq	cDNA	TRANSCRIPTOMIC	SINGLE	0	ILLUMINA	Illumina Genome Analyzer IIx	SRP011038	GEO Series accession: GSE36041	0	151765	SRS295119		10090		GSM879801: Endogenous mRNA from MEF irs1-/- knockout cells 2	SRA050265	public	YES
SRR413527	2012-02-27 09:48:49	18087659	1374662084	76	912			ftp://ftp-private.ncbi.nlm.nih.gov/sra/sra-instant/reads/ByRun/sra/SRR/SRR413/SRR413527/SRR413527.sra	SRX121900	GSM879801: Endogenous mRNA from MEF irs1-/- knockout cells 2	RNA-Seq	cDNA	TRANSCRIPTOMIC	SINGLE	0	ILLUMINA	Illumina Genome Analyzer IIx	SRP011038	GEO Series accession: GSE36041	0	151765	SRS295119		10090		GSM879801: Endogenous mRNA from MEF irs1-/- knockout cells 2	SRA050265	public	YES
SRR413528	2012-02-27 09:48:49	36522360	2775699360	76	1820			ftp://ftp-private.ncbi.nlm.nih.gov/sra/sra-instant/reads/ByRun/sra/SRR/SRR413/SRR413528/SRR413528.sra	SRX121901	GSM879802: Endogenous mRNA from MEF insr+/- -lox cells 1	RNA-Seq	cDNA	TRANSCRIPTOMIC	SINGLE	0	ILLUMINA	Illumina Genome Analyzer IIx	SRP011038	GEO Series accession: GSE36041	0	151765	SRS295120		10090		GSM879802: Endogenous mRNA from MEF insr+/- -lox cells 1	SRA050265	public	YES
SRR413529	2012-02-27 09:48:49	43674945	3319295820	76	1963			ftp://ftp-private.ncbi.nlm.nih.gov/sra/sra-instant/reads/ByRun/sra/SRR/SRR413/SRR413529/SRR413529.sra	SRX121902	GSM879803: Endogenous mRNA from MEF insr+/- knockout cells 1	RNA-Seq	cDNA	TRANSCRIPTOMIC	SINGLE	0	ILLUMINA	Illumina Genome Analyzer IIx	SRP011038	GEO Series accession: GSE36041	0	151765	SRS295121		10090		GSM879803: Endogenous mRNA from MEF insr+/- knockout cells 1	SRA050265	public	YES
SRR413530	2012-02-27 09:48:49	39048778	2967707128	76	1880			ftp://ftp-private.ncbi.nlm.nih.gov/sra/sra-instant/reads/ByRun/sra/SRR/SRR413/SRR413530/SRR413530.sra	SRX121903	GSM879804: Endogenous mRNA from MEF insr+/- -lox cells 2	RNA-Seq	cDNA	TRANSCRIPTOMIC	SINGLE	0	ILLUMINA	Illumina Genome Analyzer IIx	SRP011038	GEO Series accession: GSE36041	0	151765	SRS295122		10090		GSM879804: Endogenous mRNA from MEF insr+/- -lox cells 2	SRA050265	public	YES
SRR413531	2012-02-27 09:48:49	36478109	2772336284	76	1800			ftp://ftp-private.ncbi.nlm.nih.gov/sra/sra-instant/reads/ByRun/sra/SRR/SRR413/SRR413531/SRR413531.sra	SRX121904	GSM879805: Endogenous mRNA from MEF insr+/- knockout cells 2	RNA-Seq	cDNA	TRANSCRIPTOMIC	SINGLE	0	ILLUMINA	Illumina Genome Analyzer IIx	SRP011038	GEO Series accession: GSE36041	0	151765	SRS295123		10090		GSM879805: Endogenous mRNA from MEF insr+/- knockout cells 2	SRA050265	public	YES
SRR453186	2012-04-05 09:05:43	21694949	781018164	36	431			ftp://ftp-private.ncbi.nlm.nih.gov/sra/sra-instant/reads/ByRun/sra/SRR/SRR453/SRR453186/SRR453186.sra	SRX135180	GSM908626: control 32Dclone3 Rep 1	RNA-Seq	cDNA	TRANSCRIPTOMIC	SINGLE	0	ILLUMINA	Illumina Genome Analyzer	SRP012041	GEO Series accession: GSE37018	0	157981	SRS307277		10090		GSM908626: control 32Dclone3 Rep 1	SRA051402	public	YES
SRR453187	2012-04-05 09:05:43	22663574	815888664	36	468			ftp://ftp-private.ncbi.nlm.nih.gov/sra/sra-instant/reads/ByRun/sra/SRR/SRR453/SRR453187/SRR453187.sra	SRX135181	GSM908627: control 32Dclone3 Rep 2	RNA-Seq	cDNA	TRANSCRIPTOMIC	SINGLE	0	ILLUMINA	Illumina Genome Analyzer	SRP012041	GEO Series accession: GSE37018	0	157981	SRS307278		10090		GSM908627: control 32Dclone3 Rep 2	SRA051402	public	YES
SRR453188	2012-04-05 09:05:43	24925476	897317136	36	517			ftp://ftp-private.ncbi.nlm.nih.gov/sra/sra-instant/reads/ByRun/sra/SRR/SRR453/SRR453188/SRR453188.sra	SRX135182	GSM908628: miR-125b 32Dclone3 Rep 1	RNA-Seq	cDNA	TRANSCRIPTOMIC	SINGLE	0	ILLUMINA	Illumina Genome Analyzer	SRP012041	GEO Series accession: GSE37018	0	157981	SRS307279		10090		GSM908628: miR-125b 32Dclone3 Rep 1	SRA051402	public	YES
SRR453189	2012-04-05 09:05:43	25049721	901789956	36	531			ftp://ftp-private.ncbi.nlm.nih.gov/sra/sra-instant/reads/ByRun/sra/SRR/SRR453/SRR453189/SRR453189.sra	SRX135183	GSM908629: miR-125b 32Dclone3 Rep 2	RNA-Seq	cDNA	TRANSCRIPTOMIC	SINGLE	0	ILLUMINA	Illumina Genome Analyzer	SRP012041	GEO Series accession: GSE37018	0	157981	SRS307280		10090		GSM908629: miR-125b 32Dclone3 Rep 2	SRA051402	public	YES
SRR398041	2012-03-12 08:19:54	17167578	1716757800	100	1042			ftp://ftp-private.ncbi.nlm.nih.gov/sra/sra-instant/reads/ByRun/sra/SRR/SRR398/SRR398041/SRR398041.sra	SRX115378	GSM860183: SG-B_RNAseq	RNA-Seq	cDNA	TRANSCRIPTOMIC	SINGLE	0	ILLUMINA	Illumina Genome Analyzer II	SRP010262	GEO Series accession: GSE35005	0	151173	SRS285578		10090		GSM860183: SG-B_RNAseq	SRA049206	public	YES
SRR398042	2012-03-12 08:19:54	13688910	1368891000	100	832			ftp://ftp-private.ncbi.nlm.nih.gov/sra/sra-instant/reads/ByRun/sra/SRR/SRR398/SRR398042/SRR398042.sra	SRX115378	GSM860183: SG-B_RNAseq	RNA-Seq	cDNA	TRANSCRIPTOMIC	SINGLE	0	ILLUMINA	Illumina Genome Analyzer II	SRP010262	GEO Series accession: GSE35005	0	151173	SRS285578		10090		GSM860183: SG-B_RNAseq	SRA049206	public	YES
SRR398043	2012-03-12 08:19:54	25672486	2567248600	100	1642			ftp://ftp-private.ncbi.nlm.nih.gov/sra/sra-instant/reads/ByRun/sra/SRR/SRR398/SRR398043/SRR398043.sra	SRX115379	GSM860184: lepSC_RNAseq	RNA-Seq	cDNA	TRANSCRIPTOMIC	SINGLE	0	ILLUMINA	Illumina Genome Analyzer II	SRP010262	GEO Series accession: GSE35005	0	151173	SRS285579		10090		GSM860184: lepSC_RNAseq	SRA049206	public	YES
SRR398044	2012-03-12 08:19:54	14197110	1419711000	100	863			ftp://ftp-private.ncbi.nlm.nih.gov/sra/sra-instant/reads/ByRun/sra/SRR/SRR398/SRR398044/SRR398044.sra	SRX115379	GSM860184: lepSC_RNAseq	RNA-Seq	cDNA	TRANSCRIPTOMIC	SINGLE	0	ILLUMINA	Illumina Genome Analyzer II	SRP010262	GEO Series accession: GSE35005	0	151173	SRS285579		10090		GSM860184: lepSC_RNAseq	SRA049206	public	YES
SRR398045	2012-03-12 08:19:54	23691841	2369184100	100	1524			ftp://ftp-private.ncbi.nlm.nih.gov/sra/sra-instant/reads/ByRun/sra/SRR/SRR398/SRR398045/SRR398045.sra	SRX115380	GSM860185: pacSC_RNAseq	RNA-Seq	cDNA	TRANSCRIPTOMIC	SINGLE	0	ILLUMINA	Illumina Genome Analyzer II	SRP010262	GEO Series accession: GSE35005	0	151173	SRS285580		10090		GSM860185: pacSC_RNAseq	SRA049206	public	YES
SRR398046	2012-03-12 08:19:54	8744710	874471000	100	503			ftp://ftp-private.ncbi.nlm.nih.gov/sra/sra-instant/reads/ByRun/sra/SRR/SRR398/SRR398046/SRR398046.sra	SRX115380	GSM860185: pacSC_RNAseq	RNA-Seq	cDNA	TRANSCRIPTOMIC	SINGLE	0	ILLUMINA	Illumina Genome Analyzer II	SRP010262	GEO Series accession: GSE35005	0	151173	SRS285580		10090		GSM860185: pacSC_RNAseq	SRA049206	public	YES
SRR398047	2012-03-12 08:19:54	18885534	1888553400	100	1124			ftp://ftp-private.ncbi.nlm.nih.gov/sra/sra-instant/reads/ByRun/sra/SRR/SRR398/SRR398047/SRR398047.sra	SRX115381	GSM860186: rST_RNAseq	RNA-Seq	cDNA	TRANSCRIPTOMIC	SINGLE	0	ILLUMINA	Illumina Genome Analyzer II	SRP010262	GEO Series accession: GSE35005	0	151173	SRS285581		10090		GSM860186: rST_RNAseq	SRA049206	public	YES
SRR398048	2012-03-12 08:19:54	19216202	1921620200	100	1213			ftp://ftp-private.ncbi.nlm.nih.gov/sra/sra-instant/reads/ByRun/sra/SRR/SRR398/SRR398048/SRR398048.sra	SRX115381	GSM860186: rST_RNAseq	RNA-Seq	cDNA	TRANSCRIPTOMIC	SINGLE	0	ILLUMINA	Illumina Genome Analyzer II	SRP010262	GEO Series accession: GSE35005	0	151173	SRS285581		10090		GSM860186: rST_RNAseq	SRA049206	public	YES
SRR398049	2012-03-12 08:19:54	15795012	1579501200	100	959			ftp://ftp-private.ncbi.nlm.nih.gov/sra/sra-instant/reads/ByRun/sra/SRR/SRR398/SRR398049/SRR398049.sra	SRX115382	GSM860187: eST_RNAseq	RNA-Seq	cDNA	TRANSCRIPTOMIC	SINGLE	0	ILLUMINA	Illumina Genome Analyzer II	SRP010262	GEO Series accession: GSE35005	0	151173	SRS285582		10090		GSM860187: eST_RNAseq	SRA049206	public	YES
SRR398050	2012-03-12 08:19:54	14568706	1456870600	100	887			ftp://ftp-private.ncbi.nlm.nih.gov/sra/sra-instant/reads/ByRun/sra/SRR/SRR398/SRR398050/SRR398050.sra	SRX115382	GSM860187: eST_RNAseq	RNA-Seq	cDNA	TRANSCRIPTOMIC	SINGLE	0	ILLUMINA	Illumina Genome Analyzer II	SRP010262	GEO Series accession: GSE35005	0	151173	SRS285582		10090		GSM860187: eST_RNAseq	SRA049206	public	YES
SRR398051	2012-03-12 08:19:54	19942773	1994277300	100	1212			ftp://ftp-private.ncbi.nlm.nih.gov/sra/sra-instant/reads/ByRun/sra/SRR/SRR398/SRR398051/SRR398051.sra	SRX115383	GSM860188: SE_RNAseq	RNA-Seq	cDNA	TRANSCRIPTOMIC	SINGLE	0	ILLUMINA	Illumina Genome Analyzer II	SRP010262	GEO Series accession: GSE35005	0	151173	SRS285583		10090		GSM860188: SE_RNAseq	SRA049206	public	YES
SRR398052	2012-03-12 08:19:54	17048262	1704826200	100	1036			ftp://ftp-private.ncbi.nlm.nih.gov/sra/sra-instant/reads/ByRun/sra/SRR/SRR398/SRR398052/SRR398052.sra	SRX115383	GSM860188: SE_RNAseq	RNA-Seq	cDNA	TRANSCRIPTOMIC	SINGLE	0	ILLUMINA	Illumina Genome Analyzer II	SRP010262	GEO Series accession: GSE35005	0	151173	SRS285583		10090		GSM860188: SE_RNAseq	SRA049206	public	YES
SRR445810	2012-03-21 09:53:21	62571093	2252559348	36	1221			ftp://ftp-private.ncbi.nlm.nih.gov/sra/sra-instant/reads/ByRun/sra/SRR/SRR445/SRR445810/SRR445810.sra	SRX130056	GSM896964: Mll1+/+	RNA-Seq	cDNA	TRANSCRIPTOMIC	SINGLE	0	ILLUMINA	Illumina Genome Analyzer II	SRP011556	GEO Series accession: GSE36567	0	153723	SRS300767		10090		GSM896964: Mll1+/+	SRA050922	public	YES
SRR445811	2012-03-21 09:53:21	62359689	2244948804	36	1222			ftp://ftp-private.ncbi.nlm.nih.gov/sra/sra-instant/reads/ByRun/sra/SRR/SRR445/SRR445811/SRR445811.sra	SRX130057	GSM896965: Mll1+/+ TNF	RNA-Seq	cDNA	TRANSCRIPTOMIC	SINGLE	0	ILLUMINA	Illumina Genome Analyzer II	SRP011556	GEO Series accession: GSE36567	0	153723	SRS300768		10090		GSM896965: Mll1+/+ TNF	SRA050922	public	YES
SRR445812	2012-03-21 09:53:21	63255695	2277205020	36	1132			ftp://ftp-private.ncbi.nlm.nih.gov/sra/sra-instant/reads/ByRun/sra/SRR/SRR445/SRR445812/SRR445812.sra	SRX130058	GSM896966: Mll1 -/-	RNA-Seq	cDNA	TRANSCRIPTOMIC	SINGLE	0	ILLUMINA	Illumina Genome Analyzer II	SRP011556	GEO Series accession: GSE36567	0	153723	SRS300769		10090		GSM896966: Mll1 -/-	SRA050922	public	YES
SRR445813	2012-03-21 09:53:21	63988382	2303581752	36	1122			ftp://ftp-private.ncbi.nlm.nih.gov/sra/sra-instant/reads/ByRun/sra/SRR/SRR445/SRR445813/SRR445813.sra	SRX130059	GSM896967: Mll1 -/- TNF	RNA-Seq	cDNA	TRANSCRIPTOMIC	SINGLE	0	ILLUMINA	Illumina Genome Analyzer II	SRP011556	GEO Series accession: GSE36567	0	153723	SRS300770		10090		GSM896967: Mll1 -/- TNF	SRA050922	public	YES
SRR072988	2010-12-28 15:59:57	13506926	486249336	36	515		unspecified	ftp://ftp-private.ncbi.nlm.nih.gov/sra/sra-instant/reads/ByRun/sra/SRR/SRR072/SRR072988/SRR072988.sra	SRX031219	GSM623994: Prdm14 Knockdown_RNAseq	RNA-Seq	cDNA	TRANSCRIPTOMIC	SINGLE	0	ILLUMINA	Illumina Genome Analyzer II	SRP004451	GEO Series accession: GSE25409	21183938	134151	SRS121298		10090	Mus musculus	Mus musculus	SRA026478	public	YES
SRR072989	2010-12-28 15:59:57	13181658	474539688	36	502		unspecified	ftp://ftp-private.ncbi.nlm.nih.gov/sra/sra-instant/reads/ByRun/sra/SRR/SRR072/SRR072989/SRR072989.sra	SRX031220	GSM623995: control Knockdown_RNAseq	RNA-Seq	cDNA	TRANSCRIPTOMIC	SINGLE	0	ILLUMINA	Illumina Genome Analyzer II	SRP004451	GEO Series accession: GSE25409	21183938	134151	SRS121299		10090	Mus musculus	Mus musculus	SRA026478	public	YES
SRR073954	2011-06-10 10:08:46	23382526	841770936	36	892			ftp://ftp-private.ncbi.nlm.nih.gov/sra/sra-instant/reads/ByRun/sra/SRR/SRR073/SRR073954/SRR073954.sra	SRX032128	GSM629280: microRNA expression in CFU-E late erythroid progenitors	RNA-Seq	size fractionation	TRANSCRIPTOMIC	SINGLE	0	ILLUMINA	Illumina Genome Analyzer II	SRP004639	GEO Series accession: GSE25602	21196494	134245	SRS139618		10090	Mus musculus	Mus musculus	SRA026689	public	NO
SRR073955	2011-06-10 10:08:46	19418005	699048180	36	740			ftp://ftp-private.ncbi.nlm.nih.gov/sra/sra-instant/reads/ByRun/sra/SRR/SRR073/SRR073955/SRR073955.sra	SRX032129	GSM629281: microRNA expression in Ter119+ mature erythroblasts	RNA-Seq	size fractionation	TRANSCRIPTOMIC	SINGLE	0	ILLUMINA	Illumina Genome Analyzer II	SRP004639	GEO Series accession: GSE25602	21196494	134245	SRS139619		10090	Mus musculus	Mus musculus	SRA026689	public	NO
SRR074359	2011-11-15 14:03:41	2785131	114190371	41	119			ftp://ftp-private.ncbi.nlm.nih.gov/sra/sra-instant/reads/ByRun/sra/SRR/SRR074/SRR074359/SRR074359.sra	SRX032430	GSM629701: TSC2WT_Small_Replicate1	RNA-Seq	other	TRANSCRIPTOMIC	SINGLE	0	ILLUMINA	Illumina Genome Analyzer	SRP004708	GEO Series accession: GSE25626	0	142427	SRS140046		10090	Mus musculus	Mus musculus	SRA026761	public	NO
SRR074360	2011-11-15 14:03:41	5086078	208529198	41	218		unspecified	ftp://ftp-private.ncbi.nlm.nih.gov/sra/sra-instant/reads/ByRun/sra/SRR/SRR074/SRR074360/SRR074360.sra	SRX032431	GSM629702: TSC2WT_Medium_Replicate1	RNA-Seq	other	TRANSCRIPTOMIC	SINGLE	0	ILLUMINA	Illumina Genome Analyzer	SRP004708	GEO Series accession: GSE25626	0	142427	SRS140047		10090	Mus musculus	Mus musculus	SRA026761	public	NO
SRR074361	2011-11-15 14:03:41	6548774	268499734	41	281		unspecified	ftp://ftp-private.ncbi.nlm.nih.gov/sra/sra-instant/reads/ByRun/sra/SRR/SRR074/SRR074361/SRR074361.sra	SRX032432	GSM629703: TSC2WT_Large_Replicate1	RNA-Seq	other	TRANSCRIPTOMIC	SINGLE	0	ILLUMINA	Illumina Genome Analyzer	SRP004708	GEO Series accession: GSE25626	0	142427	SRS140048		10090	Mus musculus	Mus musculus	SRA026761	public	NO
SRR074362	2011-11-15 14:03:41	1343046	55064886	41	57			ftp://ftp-private.ncbi.nlm.nih.gov/sra/sra-instant/reads/ByRun/sra/SRR/SRR074/SRR074362/SRR074362.sra	SRX032433	GSM629704: TSC2KO_Small_Replicate1	RNA-Seq	other	TRANSCRIPTOMIC	SINGLE	0	ILLUMINA	Illumina Genome Analyzer	SRP004708	GEO Series accession: GSE25626	0	142427	SRS140049		10090	Mus musculus	Mus musculus	SRA026761	public	NO
SRR074363	2011-11-15 14:03:41	3252925	133369925	41	139		unspecified	ftp://ftp-private.ncbi.nlm.nih.gov/sra/sra-instant/reads/ByRun/sra/SRR/SRR074/SRR074363/SRR074363.sra	SRX032434	GSM629705: TSC2KO_Medium_Replicate1	RNA-Seq	other	TRANSCRIPTOMIC	SINGLE	0	ILLUMINA	Illumina Genome Analyzer	SRP004708	GEO Series accession: GSE25626	0	142427	SRS140050		10090	Mus musculus	Mus musculus	SRA026761	public	NO
SRR074364	2011-11-15 14:03:41	6408570	262751370	41	275			ftp://ftp-private.ncbi.nlm.nih.gov/sra/sra-instant/reads/ByRun/sra/SRR/SRR074/SRR074364/SRR074364.sra	SRX032435	GSM629706: TSC2KO_Large_Replicate1	RNA-Seq	other	TRANSCRIPTOMIC	SINGLE	0	ILLUMINA	Illumina Genome Analyzer	SRP004708	GEO Series accession: GSE25626	0	142427	SRS140051		10090	Mus musculus	Mus musculus	SRA026761	public	NO
SRR074365	2011-11-15 14:03:41	2585299	105997259	41	110		unspecified	ftp://ftp-private.ncbi.nlm.nih.gov/sra/sra-instant/reads/ByRun/sra/SRR/SRR074/SRR074365/SRR074365.sra	SRX032436	GSM629707: TSC2WT_RAP_Small_Replicate1	RNA-Seq	other	TRANSCRIPTOMIC	SINGLE	0	ILLUMINA	Illumina Genome Analyzer	SRP004708	GEO Series accession: GSE25626	0	142427	SRS140052		10090	Mus musculus	Mus musculus	SRA026761	public	NO
SRR074366	2011-11-15 14:03:41	1531516	62792156	41	65		unspecified	ftp://ftp-private.ncbi.nlm.nih.gov/sra/sra-instant/reads/ByRun/sra/SRR/SRR074/SRR074366/SRR074366.sra	SRX032437	GSM629708: TSC2WT_RAP_Medium_Replicate1	RNA-Seq	other	TRANSCRIPTOMIC	SINGLE	0	ILLUMINA	Illumina Genome Analyzer	SRP004708	GEO Series accession: GSE25626	0	142427	SRS140053		10090	Mus musculus	Mus musculus	SRA026761	public	NO
SRR074367	2011-11-15 14:03:41	2056997	84336877	41	88		unspecified	ftp://ftp-private.ncbi.nlm.nih.gov/sra/sra-instant/reads/ByRun/sra/SRR/SRR074/SRR074367/SRR074367.sra	SRX032438	GSM629709: TSC2WT_RAP_Large_Replicate1	RNA-Seq	other	TRANSCRIPTOMIC	SINGLE	0	ILLUMINA	Illumina Genome Analyzer	SRP004708	GEO Series accession: GSE25626	0	142427	SRS140054		10090	Mus musculus	Mus musculus	SRA026761	public	NO
SRR074368	2011-11-15 14:03:41	6490822	266123702	41	278		unspecified	ftp://ftp-private.ncbi.nlm.nih.gov/sra/sra-instant/reads/ByRun/sra/SRR/SRR074/SRR074368/SRR074368.sra	SRX032439	GSM629710: TSC2WT_Small_Replicate2	RNA-Seq	other	TRANSCRIPTOMIC	SINGLE	0	ILLUMINA	Illumina Genome Analyzer	SRP004708	GEO Series accession: GSE25626	0	142427	SRS140055		10090	Mus musculus	Mus musculus	SRA026761	public	NO
SRR074369	2011-11-15 14:03:41	8036740	329506340	41	344		unspecified	ftp://ftp-private.ncbi.nlm.nih.gov/sra/sra-instant/reads/ByRun/sra/SRR/SRR074/SRR074369/SRR074369.sra	SRX032440	GSM629711: TSC2WT_Medium_Replicate2	RNA-Seq	other	TRANSCRIPTOMIC	SINGLE	0	ILLUMINA	Illumina Genome Analyzer	SRP004708	GEO Series accession: GSE25626	0	142427	SRS140056		10090	Mus musculus	Mus musculus	SRA026761	public	NO
SRR074370	2011-11-15 14:03:41	9191720	376860520	41	394		unspecified	ftp://ftp-private.ncbi.nlm.nih.gov/sra/sra-instant/reads/ByRun/sra/SRR/SRR074/SRR074370/SRR074370.sra	SRX032441	GSM629712: TSC2WT_Large_Replicate2	RNA-Seq	other	TRANSCRIPTOMIC	SINGLE	0	ILLUMINA	Illumina Genome Analyzer	SRP004708	GEO Series accession: GSE25626	0	142427	SRS140057		10090	Mus musculus	Mus musculus	SRA026761	public	NO
SRR074371	2011-11-15 14:03:41	7369991	302169631	41	316		unspecified	ftp://ftp-private.ncbi.nlm.nih.gov/sra/sra-instant/reads/ByRun/sra/SRR/SRR074/SRR074371/SRR074371.sra	SRX032442	GSM629713: TSC2KO_Small_Replicate2	RNA-Seq	other	TRANSCRIPTOMIC	SINGLE	0	ILLUMINA	Illumina Genome Analyzer	SRP004708	GEO Series accession: GSE25626	0	142427	SRS140058		10090	Mus musculus	Mus musculus	SRA026761	public	NO
SRR074372	2011-11-15 14:03:41	8983577	368326657	41	385		unspecified	ftp://ftp-private.ncbi.nlm.nih.gov/sra/sra-instant/reads/ByRun/sra/SRR/SRR074/SRR074372/SRR074372.sra	SRX032443	GSM629714: TSC2KO_Medium_Replicate2	RNA-Seq	other	TRANSCRIPTOMIC	SINGLE	0	ILLUMINA	Illumina Genome Analyzer	SRP004708	GEO Series accession: GSE25626	0	142427	SRS140059		10090	Mus musculus	Mus musculus	SRA026761	public	NO
SRR074373	2011-11-15 14:03:41	8924915	365921515	41	383		unspecified	ftp://ftp-private.ncbi.nlm.nih.gov/sra/sra-instant/reads/ByRun/sra/SRR/SRR074/SRR074373/SRR074373.sra	SRX032444	GSM629715: TSC2KO_Large_Replicate2	RNA-Seq	other	TRANSCRIPTOMIC	SINGLE	0	ILLUMINA	Illumina Genome Analyzer	SRP004708	GEO Series accession: GSE25626	0	142427	SRS140060		10090	Mus musculus	Mus musculus	SRA026761	public	NO
SRR074374	2011-11-15 14:03:41	10814176	443381216	41	464		unspecified	ftp://ftp-private.ncbi.nlm.nih.gov/sra/sra-instant/reads/ByRun/sra/SRR/SRR074/SRR074374/SRR074374.sra	SRX032445	GSM629716: TSC2WT_RAP_Small_Replicate2	RNA-Seq	other	TRANSCRIPTOMIC	SINGLE	0	ILLUMINA	Illumina Genome Analyzer	SRP004708	GEO Series accession: GSE25626	0	142427	SRS140061		10090	Mus musculus	Mus musculus	SRA026761	public	NO
SRR074375	2011-11-15 14:03:41	7583662	310930142	41	325		unspecified	ftp://ftp-private.ncbi.nlm.nih.gov/sra/sra-instant/reads/ByRun/sra/SRR/SRR074/SRR074375/SRR074375.sra	SRX032446	GSM629717: TSC2WT_RAP_Medium_Replicate2	RNA-Seq	other	TRANSCRIPTOMIC	SINGLE	0	ILLUMINA	Illumina Genome Analyzer	SRP004708	GEO Series accession: GSE25626	0	142427	SRS140062		10090	Mus musculus	Mus musculus	SRA026761	public	NO
SRR074376	2011-11-15 14:03:41	8419537	345201017	41	361		unspecified	ftp://ftp-private.ncbi.nlm.nih.gov/sra/sra-instant/reads/ByRun/sra/SRR/SRR074/SRR074376/SRR074376.sra	SRX032447	GSM629718: TSC2WT_RAP_Large_Replicate2	RNA-Seq	other	TRANSCRIPTOMIC	SINGLE	0	ILLUMINA	Illumina Genome Analyzer	SRP004708	GEO Series accession: GSE25626	0	142427	SRS140063		10090	Mus musculus	Mus musculus	SRA026761	public	NO
SRR334179	2011-08-26 19:15:22	49599202	5356713816	108	3210		unspecified	ftp://ftp-private.ncbi.nlm.nih.gov/sra/sra-instant/reads/ByRun/sra/SRR/SRR334/SRR334179/SRR334179.sra	SRX093377	GSM774011: MOLF backcross animal 3273	RNA-Seq	cDNA	TRANSCRIPTOMIC	SINGLE	0	ILLUMINA	Illumina Genome Analyzer IIx	SRP007956	GEO Series accession: GSE31223	0	154115	SRS258942		10090		Mus musculus	SRA045611	public	YES
SRR334180	2011-08-26 19:16:22	50814450	5487960600	108	3266		unspecified	ftp://ftp-private.ncbi.nlm.nih.gov/sra/sra-instant/reads/ByRun/sra/SRR/SRR334/SRR334180/SRR334180.sra	SRX093378	GSM774012: MOLF backcross animal 3427	RNA-Seq	cDNA	TRANSCRIPTOMIC	SINGLE	0	ILLUMINA	Illumina Genome Analyzer IIx	SRP007956	GEO Series accession: GSE31223	0	154115	SRS258943		10090		Mus musculus	SRA045611	public	YES
SRR334181	2011-08-26 19:09:23	51680392	5581482336	108	3324		unspecified	ftp://ftp-private.ncbi.nlm.nih.gov/sra/sra-instant/reads/ByRun/sra/SRR/SRR334/SRR334181/SRR334181.sra	SRX093379	GSM774013: MOLF backcross animal 3540	RNA-Seq	cDNA	TRANSCRIPTOMIC	SINGLE	0	ILLUMINA	Illumina Genome Analyzer IIx	SRP007956	GEO Series accession: GSE31223	0	154115	SRS258944		10090		Mus musculus	SRA045611	public	YES
SRR334182	2011-08-26 19:45:23	132260884	13358349284	101	8157		unspecified	ftp://ftp-private.ncbi.nlm.nih.gov/sra/sra-instant/reads/ByRun/sra/SRR/SRR334/SRR334182/SRR334182.sra	SRX093380	GSM774014: MOLF backcross animal 3654	RNA-Seq	cDNA	TRANSCRIPTOMIC	SINGLE	0	ILLUMINA	Illumina HiSeq 2000	SRP007956	GEO Series accession: GSE31223	0	154115	SRS258945		10090		Mus musculus	SRA045611	public	YES
SRR334183	2011-08-26 20:14:22	131810452	13312855652	101	8151		unspecified	ftp://ftp-private.ncbi.nlm.nih.gov/sra/sra-instant/reads/ByRun/sra/SRR/SRR334/SRR334183/SRR334183.sra	SRX093381	GSM774015: MOLF backcross animal 3871	RNA-Seq	cDNA	TRANSCRIPTOMIC	SINGLE	0	ILLUMINA	Illumina HiSeq 2000	SRP007956	GEO Series accession: GSE31223	0	154115	SRS258946		10090		Mus musculus	SRA045611	public	YES
SRR334184	2011-08-26 19:17:22	54489472	5884862976	108	3516		unspecified	ftp://ftp-private.ncbi.nlm.nih.gov/sra/sra-instant/reads/ByRun/sra/SRR/SRR334/SRR334184/SRR334184.sra	SRX093382	GSM774016: MOLF backcross animal 3939	RNA-Seq	cDNA	TRANSCRIPTOMIC	SINGLE	0	ILLUMINA	Illumina Genome Analyzer IIx	SRP007956	GEO Series accession: GSE31223	0	154115	SRS258947		10090		Mus musculus	SRA045611	public	YES
SRR334185	2011-08-26 20:38:22	170880624	17088062400	100	11103		unspecified	ftp://ftp-private.ncbi.nlm.nih.gov/sra/sra-instant/reads/ByRun/sra/SRR/SRR334/SRR334185/SRR334185.sra	SRX093383	GSM774017: MOLF backcross animal 4016	RNA-Seq	cDNA	TRANSCRIPTOMIC	SINGLE	0	ILLUMINA	Illumina HiSeq 2000	SRP007956	GEO Series accession: GSE31223	0	154115	SRS258948		10090		Mus musculus	SRA045611	public	YES
SRR334186	2011-08-26 20:33:21	156357726	15635772600	100	10128		unspecified	ftp://ftp-private.ncbi.nlm.nih.gov/sra/sra-instant/reads/ByRun/sra/SRR/SRR334/SRR334186/SRR334186.sra	SRX093384	GSM774018: MOLF backcross animal 4020	RNA-Seq	cDNA	TRANSCRIPTOMIC	SINGLE	0	ILLUMINA	Illumina HiSeq 2000	SRP007956	GEO Series accession: GSE31223	0	154115	SRS258949		10090		Mus musculus	SRA045611	public	YES
SRR334187	2011-08-26 19:55:22	149850260	14985026000	100	9683		unspecified	ftp://ftp-private.ncbi.nlm.nih.gov/sra/sra-instant/reads/ByRun/sra/SRR/SRR334/SRR334187/SRR334187.sra	SRX093385	GSM774019: MOLF backcross animal 4030	RNA-Seq	cDNA	TRANSCRIPTOMIC	SINGLE	0	ILLUMINA	Illumina HiSeq 2000	SRP007956	GEO Series accession: GSE31223	0	154115	SRS258950		10090		Mus musculus	SRA045611	public	YES
SRR334188	2011-08-26 20:04:30	161737942	16173794200	100	10568		unspecified	ftp://ftp-private.ncbi.nlm.nih.gov/sra/sra-instant/reads/ByRun/sra/SRR/SRR334/SRR334188/SRR334188.sra	SRX093386	GSM774020: MOLF backcross animal 4036	RNA-Seq	cDNA	TRANSCRIPTOMIC	SINGLE	0	ILLUMINA	Illumina HiSeq 2000	SRP007956	GEO Series accession: GSE31223	0	154115	SRS258951		10090		Mus musculus	SRA045611	public	YES
SRR334189	2011-08-26 20:39:22	186907672	18690767200	100	12376		unspecified	ftp://ftp-private.ncbi.nlm.nih.gov/sra/sra-instant/reads/ByRun/sra/SRR/SRR334/SRR334189/SRR334189.sra	SRX093387	GSM774021: MOLF backcross animal 4038	RNA-Seq	cDNA	TRANSCRIPTOMIC	SINGLE	0	ILLUMINA	Illumina HiSeq 2000	SRP007956	GEO Series accession: GSE31223	0	154115	SRS258952		10090		Mus musculus	SRA045611	public	YES
SRR334190	2011-08-26 20:06:21	165015080	16501508000	100	10778		unspecified	ftp://ftp-private.ncbi.nlm.nih.gov/sra/sra-instant/reads/ByRun/sra/SRR/SRR334/SRR334190/SRR334190.sra	SRX093388	GSM774022: MOLF backcross animal 4042	RNA-Seq	cDNA	TRANSCRIPTOMIC	SINGLE	0	ILLUMINA	Illumina HiSeq 2000	SRP007956	GEO Series accession: GSE31223	0	154115	SRS258953		10090		Mus musculus	SRA045611	public	YES
SRR334191	2011-08-26 20:28:23	156132350	15613235000	100	10112		unspecified	ftp://ftp-private.ncbi.nlm.nih.gov/sra/sra-instant/reads/ByRun/sra/SRR/SRR334/SRR334191/SRR334191.sra	SRX093389	GSM774023: MOLF backcross animal 4139	RNA-Seq	cDNA	TRANSCRIPTOMIC	SINGLE	0	ILLUMINA	Illumina HiSeq 2000	SRP007956	GEO Series accession: GSE31223	0	154115	SRS258954		10090		Mus musculus	SRA045611	public	YES
SRR334192	2011-08-26 19:30:22	56492270	6044672890	107	3922		unspecified	ftp://ftp-private.ncbi.nlm.nih.gov/sra/sra-instant/reads/ByRun/sra/SRR/SRR334/SRR334192/SRR334192.sra	SRX093390	GSM774024: MOLF backcross animal 4142	RNA-Seq	cDNA	TRANSCRIPTOMIC	SINGLE	0	ILLUMINA	Illumina Genome Analyzer IIx	SRP007956	GEO Series accession: GSE31223	0	154115	SRS258955		10090		Mus musculus	SRA045611	public	YES
SRR334193	2011-08-26 19:27:23	48988796	5290789968	108	3182		unspecified	ftp://ftp-private.ncbi.nlm.nih.gov/sra/sra-instant/reads/ByRun/sra/SRR/SRR334/SRR334193/SRR334193.sra	SRX093391	GSM774025: MOLF backcross animal 4144	RNA-Seq	cDNA	TRANSCRIPTOMIC	SINGLE	0	ILLUMINA	Illumina Genome Analyzer IIx	SRP007956	GEO Series accession: GSE31223	0	154115	SRS258956		10090		Mus musculus	SRA045611	public	YES
SRR334194	2011-08-26 19:26:22	44562546	4812754968	108	3260		unspecified	ftp://ftp-private.ncbi.nlm.nih.gov/sra/sra-instant/reads/ByRun/sra/SRR/SRR334/SRR334194/SRR334194.sra	SRX093392	GSM774026: MOLF backcross animal 4150	RNA-Seq	cDNA	TRANSCRIPTOMIC	SINGLE	0	ILLUMINA	Illumina Genome Analyzer IIx	SRP007956	GEO Series accession: GSE31223	0	154115	SRS258957		10090		Mus musculus	SRA045611	public	YES
SRR334195	2011-08-26 19:32:23	55681930	5957966510	107	3835		unspecified	ftp://ftp-private.ncbi.nlm.nih.gov/sra/sra-instant/reads/ByRun/sra/SRR/SRR334/SRR334195/SRR334195.sra	SRX093393	GSM774027: MOLF backcross animal 4164	RNA-Seq	cDNA	TRANSCRIPTOMIC	SINGLE	0	ILLUMINA	Illumina Genome Analyzer IIx	SRP007956	GEO Series accession: GSE31223	0	154115	SRS258958		10090		Mus musculus	SRA045611	public	YES
SRR334196	2011-08-26 19:40:23	50486932	5402101724	107	3468		unspecified	ftp://ftp-private.ncbi.nlm.nih.gov/sra/sra-instant/reads/ByRun/sra/SRR/SRR334/SRR334196/SRR334196.sra	SRX093394	GSM774028: MOLF backcross animal 4262	RNA-Seq	cDNA	TRANSCRIPTOMIC	SINGLE	0	ILLUMINA	Illumina Genome Analyzer IIx	SRP007956	GEO Series accession: GSE31223	0	154115	SRS258959		10090		Mus musculus	SRA045611	public	YES
SRR334197	2011-08-26 19:50:24	50057774	5356181818	107	3434		unspecified	ftp://ftp-private.ncbi.nlm.nih.gov/sra/sra-instant/reads/ByRun/sra/SRR/SRR334/SRR334197/SRR334197.sra	SRX093395	GSM774029: MOLF backcross animal 4315	RNA-Seq	cDNA	TRANSCRIPTOMIC	SINGLE	0	ILLUMINA	Illumina Genome Analyzer IIx	SRP007956	GEO Series accession: GSE31223	0	154115	SRS258960		10090		Mus musculus	SRA045611	public	YES
SRR334198	2011-08-26 19:37:22	47630686	5096483402	107	3282		unspecified	ftp://ftp-private.ncbi.nlm.nih.gov/sra/sra-instant/reads/ByRun/sra/SRR/SRR334/SRR334198/SRR334198.sra	SRX093396	GSM774030: MOLF backcross animal 4357	RNA-Seq	cDNA	TRANSCRIPTOMIC	SINGLE	0	ILLUMINA	Illumina Genome Analyzer IIx	SRP007956	GEO Series accession: GSE31223	0	154115	SRS258961		10090		Mus musculus	SRA045611	public	YES
SRR334199	2011-08-26 19:51:23	48201678	5157579546	107	3335		unspecified	ftp://ftp-private.ncbi.nlm.nih.gov/sra/sra-instant/reads/ByRun/sra/SRR/SRR334/SRR334199/SRR334199.sra	SRX093397	GSM774031: MOLF backcross animal 4378	RNA-Seq	cDNA	TRANSCRIPTOMIC	SINGLE	0	ILLUMINA	Illumina Genome Analyzer IIx	SRP007956	GEO Series accession: GSE31223	0	154115	SRS258962		10090		Mus musculus	SRA045611	public	YES
SRR334200	2011-08-26 19:47:33	49260346	5320117368	108	3422		unspecified	ftp://ftp-private.ncbi.nlm.nih.gov/sra/sra-instant/reads/ByRun/sra/SRR/SRR334/SRR334200/SRR334200.sra	SRX093398	GSM774032: MOLF backcross animal 4438	RNA-Seq	cDNA	TRANSCRIPTOMIC	SINGLE	0	ILLUMINA	Illumina Genome Analyzer IIx	SRP007956	GEO Series accession: GSE31223	0	154115	SRS258963		10090		Mus musculus	SRA045611	public	YES
SRR334201	2011-08-26 20:19:23	149082550	15057337550	101	9198		unspecified	ftp://ftp-private.ncbi.nlm.nih.gov/sra/sra-instant/reads/ByRun/sra/SRR/SRR334/SRR334201/SRR334201.sra	SRX093399	GSM774033: MOLF backcross animal 4459	RNA-Seq	cDNA	TRANSCRIPTOMIC	SINGLE	0	ILLUMINA	Illumina HiSeq 2000	SRP007956	GEO Series accession: GSE31223	0	154115	SRS258964		10090		Mus musculus	SRA045611	public	YES
SRR334202	2011-08-26 20:11:22	112858756	11398734356	101	6890		unspecified	ftp://ftp-private.ncbi.nlm.nih.gov/sra/sra-instant/reads/ByRun/sra/SRR/SRR334/SRR334202/SRR334202.sra	SRX093400	GSM774034: MOLF backcross animal 4461	RNA-Seq	cDNA	TRANSCRIPTOMIC	SINGLE	0	ILLUMINA	Illumina HiSeq 2000	SRP007956	GEO Series accession: GSE31223	0	154115	SRS258965		10090		Mus musculus	SRA045611	public	YES
SRR334203	2011-08-26 20:37:22	179888702	18168758902	101	11452		unspecified	ftp://ftp-private.ncbi.nlm.nih.gov/sra/sra-instant/reads/ByRun/sra/SRR/SRR334/SRR334203/SRR334203.sra	SRX093401	GSM774035: MOLF backcross animal 4488	RNA-Seq	cDNA	TRANSCRIPTOMIC	SINGLE	0	ILLUMINA	Illumina HiSeq 2000	SRP007956	GEO Series accession: GSE31223	0	154115	SRS258966		10090		Mus musculus	SRA045611	public	YES
SRR334204	2011-08-26 20:40:23	177099366	17887035966	101	11197		unspecified	ftp://ftp-private.ncbi.nlm.nih.gov/sra/sra-instant/reads/ByRun/sra/SRR/SRR334/SRR334204/SRR334204.sra	SRX093402	GSM774036: MOLF backcross animal 4492	RNA-Seq	cDNA	TRANSCRIPTOMIC	SINGLE	0	ILLUMINA	Illumina HiSeq 2000	SRP007956	GEO Series accession: GSE31223	0	154115	SRS258967		10090		Mus musculus	SRA045611	public	YES
SRR334205	2011-08-26 20:45:22	175630328	17738663128	101	11196		unspecified	ftp://ftp-private.ncbi.nlm.nih.gov/sra/sra-instant/reads/ByRun/sra/SRR/SRR334/SRR334205/SRR334205.sra	SRX093403	GSM774037: MOLF backcross animal 4511	RNA-Seq	cDNA	TRANSCRIPTOMIC	SINGLE	0	ILLUMINA	Illumina HiSeq 2000	SRP007956	GEO Series accession: GSE31223	0	154115	SRS258968		10090		Mus musculus	SRA045611	public	YES
SRR334206	2011-08-26 20:02:23	54062894	5838792552	108	3812		unspecified	ftp://ftp-private.ncbi.nlm.nih.gov/sra/sra-instant/reads/ByRun/sra/SRR/SRR334/SRR334206/SRR334206.sra	SRX093404	GSM774038: MOLF backcross animal 4516	RNA-Seq	cDNA	TRANSCRIPTOMIC	SINGLE	0	ILLUMINA	Illumina Genome Analyzer IIx	SRP007956	GEO Series accession: GSE31223	0	154115	SRS258969		10090		Mus musculus	SRA045611	public	YES
SRR334207	2011-08-26 20:14:22	54402368	5875455744	108	3836		unspecified	ftp://ftp-private.ncbi.nlm.nih.gov/sra/sra-instant/reads/ByRun/sra/SRR/SRR334/SRR334207/SRR334207.sra	SRX093405	GSM774039: MOLF backcross animal 4547	RNA-Seq	cDNA	TRANSCRIPTOMIC	SINGLE	0	ILLUMINA	Illumina Genome Analyzer IIx	SRP007956	GEO Series accession: GSE31223	0	154115	SRS258970		10090		Mus musculus	SRA045611	public	YES
SRR334208	2011-08-26 20:07:23	53659080	5795180640	108	3755		unspecified	ftp://ftp-private.ncbi.nlm.nih.gov/sra/sra-instant/reads/ByRun/sra/SRR/SRR334/SRR334208/SRR334208.sra	SRX093406	GSM774040: MOLF backcross animal 4638	RNA-Seq	cDNA	TRANSCRIPTOMIC	SINGLE	0	ILLUMINA	Illumina Genome Analyzer IIx	SRP007956	GEO Series accession: GSE31223	0	154115	SRS258971		10090		Mus musculus	SRA045611	public	YES
SRR390297	2012-03-01 13:11:00	16537853	595362708	36	427			ftp://ftp-private.ncbi.nlm.nih.gov/sra/sra-instant/reads/ByRun/sra/SRR/SRR390/SRR390297/SRR390297.sra	SRX111823	GSM849855: Total RNA extracted from mock infected NIH-3T3 cells	RNA-Seq	size fractionation	TRANSCRIPTOMIC	SINGLE	0	ILLUMINA	Illumina Genome Analyzer IIx	SRP009848	GEO Series accession: GSE34475	0	151355	SRS282578		10090		GSM849855: Total RNA extracted from mock infected NIH-3T3 cells	SRA048669	public	NO
SRR390298	2012-03-01 13:11:00	32933501	1185606036	36	733			ftp://ftp-private.ncbi.nlm.nih.gov/sra/sra-instant/reads/ByRun/sra/SRR/SRR390/SRR390298/SRR390298.sra	SRX111824	GSM849856: Total RNA extracted from MCMV infected NIH-3T3 cells	RNA-Seq	size fractionation	TRANSCRIPTOMIC	SINGLE	0	ILLUMINA	Illumina Genome Analyzer IIx	SRP009848	GEO Series accession: GSE34475	0	151355	SRS282579		10090		GSM849856: Total RNA extracted from MCMV infected NIH-3T3 cells	SRA048669	public	NO
SRR390299	2012-03-01 13:11:00	16292275	586521900	36	415			ftp://ftp-private.ncbi.nlm.nih.gov/sra/sra-instant/reads/ByRun/sra/SRR/SRR390/SRR390299/SRR390299.sra	SRX111825	GSM849857: Ago 2 immunoprecipitated RNA extracted from mock infected NIH-3T3 cells	RNA-Seq	size fractionation	TRANSCRIPTOMIC	SINGLE	0	ILLUMINA	Illumina Genome Analyzer IIx	SRP009848	GEO Series accession: GSE34475	0	151355	SRS282580		10090		GSM849857: Ago 2 immunoprecipitated RNA extracted from mock infected NIH-3T3 cells	SRA048669	public	NO
SRR390300	2012-03-01 13:11:00	25278719	910033884	36	469			ftp://ftp-private.ncbi.nlm.nih.gov/sra/sra-instant/reads/ByRun/sra/SRR/SRR390/SRR390300/SRR390300.sra	SRX111826	GSM849858: Ago 2 immunoprecipitated RNA extracted from MCMV infected NIH-3T3 cells	RNA-Seq	size fractionation	TRANSCRIPTOMIC	SINGLE	0	ILLUMINA	Illumina Genome Analyzer IIx	SRP009848	GEO Series accession: GSE34475	0	151355	SRS282581		10090		GSM849858: Ago 2 immunoprecipitated RNA extracted from MCMV infected NIH-3T3 cells	SRA048669	public	NO
SRR391028	2012-02-01 09:14:03	27185780	1033059640	38	431			ftp://ftp-private.ncbi.nlm.nih.gov/sra/sra-instant/reads/ByRun/sra/SRR/SRR391/SRR391028/SRR391028.sra	SRX112175	GSM850476: OS25 cells mRNA-Seq	RNA-Seq	cDNA	TRANSCRIPTOMIC	SINGLE	0	ILLUMINA	Illumina Genome Analyzer IIx	SRP009882	GEO Series accession: GSE34519	0	156323	SRS282892		10090		GSM850476: OS25 cells mRNA-Seq	SRA048719	public	YES
SRR391029	2012-02-01 09:14:03	26880152	2016011400	75	973			ftp://ftp-private.ncbi.nlm.nih.gov/sra/sra-instant/reads/ByRun/sra/SRR/SRR391/SRR391029/SRR391029.sra	SRX112175	GSM850476: OS25 cells mRNA-Seq	RNA-Seq	cDNA	TRANSCRIPTOMIC	SINGLE	0	ILLUMINA	Illumina Genome Analyzer IIx	SRP009882	GEO Series accession: GSE34519	0	156323	SRS282892		10090		GSM850476: OS25 cells mRNA-Seq	SRA048719	public	YES
SRR391030	2012-02-01 09:14:03	26685714	2001428550	75	961			ftp://ftp-private.ncbi.nlm.nih.gov/sra/sra-instant/reads/ByRun/sra/SRR/SRR391/SRR391030/SRR391030.sra	SRX112175	GSM850476: OS25 cells mRNA-Seq	RNA-Seq	cDNA	TRANSCRIPTOMIC	SINGLE	0	ILLUMINA	Illumina Genome Analyzer IIx	SRP009882	GEO Series accession: GSE34519	0	156323	SRS282892		10090		GSM850476: OS25 cells mRNA-Seq	SRA048719	public	YES
SRR391031	2012-02-01 09:14:03	26418877	1981415775	75	950			ftp://ftp-private.ncbi.nlm.nih.gov/sra/sra-instant/reads/ByRun/sra/SRR/SRR391/SRR391031/SRR391031.sra	SRX112175	GSM850476: OS25 cells mRNA-Seq	RNA-Seq	cDNA	TRANSCRIPTOMIC	SINGLE	0	ILLUMINA	Illumina Genome Analyzer IIx	SRP009882	GEO Series accession: GSE34519	0	156323	SRS282892		10090		GSM850476: OS25 cells mRNA-Seq	SRA048719	public	YES
SRR391845	2012-02-02 09:01:25	24488395	881582220	36	605			ftp://ftp-private.ncbi.nlm.nih.gov/sra/sra-instant/reads/ByRun/sra/SRR/SRR391/SRR391845/SRR391845.sra	SRX112710	GSM852140: wild type replicate 1	RNA-Seq	cDNA	OTHER	SINGLE	0	ILLUMINA	Illumina Genome Analyzer II	SRP009919	GEO Series accession: GSE34626	0	151273	SRS283223		10090		GSM852140: wild type replicate 1	SRA048763	public	NO
SRR391846	2012-02-02 09:01:25	22749419	818979084	36	583			ftp://ftp-private.ncbi.nlm.nih.gov/sra/sra-instant/reads/ByRun/sra/SRR/SRR391/SRR391846/SRR391846.sra	SRX112711	GSM852141: ADAR2-/- replicate 1	RNA-Seq	cDNA	OTHER	SINGLE	0	ILLUMINA	Illumina Genome Analyzer II	SRP009919	GEO Series accession: GSE34626	0	151273	SRS283224		10090		GSM852141: ADAR2-/- replicate 1	SRA048763	public	NO
SRR391847	2012-02-02 09:01:25	24813687	893292732	36	645			ftp://ftp-private.ncbi.nlm.nih.gov/sra/sra-instant/reads/ByRun/sra/SRR/SRR391/SRR391847/SRR391847.sra	SRX112712	GSM852142: ADAR2-/-/ADAR1-/- replicate 1	RNA-Seq	cDNA	OTHER	SINGLE	0	ILLUMINA	Illumina Genome Analyzer II	SRP009919	GEO Series accession: GSE34626	0	151273	SRS283225		10090		GSM852142: ADAR2-/-/ADAR1-/- replicate 1	SRA048763	public	NO
SRR391848	2012-02-02 09:01:25	23375407	841514652	36	473			ftp://ftp-private.ncbi.nlm.nih.gov/sra/sra-instant/reads/ByRun/sra/SRR/SRR391/SRR391848/SRR391848.sra	SRX112713	GSM852143: wild type replicate 2	RNA-Seq	cDNA	OTHER	SINGLE	0	ILLUMINA	Illumina Genome Analyzer II	SRP009919	GEO Series accession: GSE34626	0	151273	SRS283226		10090		GSM852143: wild type replicate 2	SRA048763	public	NO
SRR391849	2012-02-02 09:01:25	19578410	704822760	36	395			ftp://ftp-private.ncbi.nlm.nih.gov/sra/sra-instant/reads/ByRun/sra/SRR/SRR391/SRR391849/SRR391849.sra	SRX112714	GSM852144: ADAR2-/- replicate 2	RNA-Seq	cDNA	OTHER	SINGLE	0	ILLUMINA	Illumina Genome Analyzer II	SRP009919	GEO Series accession: GSE34626	0	151273	SRS283227		10090		GSM852144: ADAR2-/- replicate 2	SRA048763	public	NO
SRR391850	2012-02-02 09:01:25	18400282	662410152	36	361			ftp://ftp-private.ncbi.nlm.nih.gov/sra/sra-instant/reads/ByRun/sra/SRR/SRR391/SRR391850/SRR391850.sra	SRX112715	GSM852145: ADAR2-/-/ADAR1-/- replicate 2	RNA-Seq	cDNA	OTHER	SINGLE	0	ILLUMINA	Illumina Genome Analyzer II	SRP009919	GEO Series accession: GSE34626	0	151273	SRS283228		10090		GSM852145: ADAR2-/-/ADAR1-/- replicate 2	SRA048763	public	NO
SRR391851	2012-02-02 09:01:25	29289053	1054405908	36	690			ftp://ftp-private.ncbi.nlm.nih.gov/sra/sra-instant/reads/ByRun/sra/SRR/SRR391/SRR391851/SRR391851.sra	SRX112716	GSM852146: wild type replicate 3	RNA-Seq	cDNA	OTHER	SINGLE	0	ILLUMINA	Illumina Genome Analyzer II	SRP009919	GEO Series accession: GSE34626	0	151273	SRS283229		10090		GSM852146: wild type replicate 3	SRA048763	public	NO
SRR391852	2012-02-02 09:01:25	30692700	1104937200	36	709			ftp://ftp-private.ncbi.nlm.nih.gov/sra/sra-instant/reads/ByRun/sra/SRR/SRR391/SRR391852/SRR391852.sra	SRX112717	GSM852147: ADAR2-/- replicate 3	RNA-Seq	cDNA	OTHER	SINGLE	0	ILLUMINA	Illumina Genome Analyzer II	SRP009919	GEO Series accession: GSE34626	0	151273	SRS283230		10090		GSM852147: ADAR2-/- replicate 3	SRA048763	public	NO
SRR391853	2012-02-02 09:01:25	28347425	1020507300	36	676			ftp://ftp-private.ncbi.nlm.nih.gov/sra/sra-instant/reads/ByRun/sra/SRR/SRR391/SRR391853/SRR391853.sra	SRX112718	GSM852148: ADAR2-/-/ADAR1-/- replicate 3	RNA-Seq	cDNA	OTHER	SINGLE	0	ILLUMINA	Illumina Genome Analyzer II	SRP009919	GEO Series accession: GSE34626	0	151273	SRS283231		10090		GSM852148: ADAR2-/-/ADAR1-/- replicate 3	SRA048763	public	NO
SRR398037	2012-03-12 08:19:54	21089575	2108957500	100	1314			ftp://ftp-private.ncbi.nlm.nih.gov/sra/sra-instant/reads/ByRun/sra/SRR/SRR398/SRR398037/SRR398037.sra	SRX115376	GSM860181: priSG-A_RNAseq	RNA-Seq	cDNA	TRANSCRIPTOMIC	SINGLE	0	ILLUMINA	Illumina Genome Analyzer II	SRP010262	GEO Series accession: GSE35005	0	151173	SRS285576		10090		GSM860181: priSG-A_RNAseq	SRA049206	public	YES
SRR398038	2012-03-12 08:19:54	25442092	2544209200	100	1621			ftp://ftp-private.ncbi.nlm.nih.gov/sra/sra-instant/reads/ByRun/sra/SRR/SRR398/SRR398038/SRR398038.sra	SRX115376	GSM860181: priSG-A_RNAseq	RNA-Seq	cDNA	TRANSCRIPTOMIC	SINGLE	0	ILLUMINA	Illumina Genome Analyzer II	SRP010262	GEO Series accession: GSE35005	0	151173	SRS285576		10090		GSM860181: priSG-A_RNAseq	SRA049206	public	YES
SRR398039	2012-03-12 08:19:54	18764778	1876477800	100	1139			ftp://ftp-private.ncbi.nlm.nih.gov/sra/sra-instant/reads/ByRun/sra/SRR/SRR398/SRR398039/SRR398039.sra	SRX115377	GSM860182: SG-A_RNAseq	RNA-Seq	cDNA	TRANSCRIPTOMIC	SINGLE	0	ILLUMINA	Illumina Genome Analyzer II	SRP010262	GEO Series accession: GSE35005	0	151173	SRS285577		10090		GSM860182: SG-A_RNAseq	SRA049206	public	YES
SRR398040	2012-03-12 08:19:54	21852045	2185204500	100	1385			ftp://ftp-private.ncbi.nlm.nih.gov/sra/sra-instant/reads/ByRun/sra/SRR/SRR398/SRR398040/SRR398040.sra	SRX115377	GSM860182: SG-A_RNAseq	RNA-Seq	cDNA	TRANSCRIPTOMIC	SINGLE	0	ILLUMINA	Illumina Genome Analyzer II	SRP010262	GEO Series accession: GSE35005	0	151173	SRS285577		10090		GSM860182: SG-A_RNAseq	SRA049206	public	YES
SRR327029	2011-11-07 10:09:52	26327568	974120016	37	436		unspecified	ftp://ftp-private.ncbi.nlm.nih.gov/sra/sra-instant/reads/ByRun/sra/SRR/SRR327/SRR327029/SRR327029.sra	SRX088966	GSM773068: WT mRNA-seq	RNA-Seq	cDNA	TRANSCRIPTOMIC	SINGLE	0	ILLUMINA	Illumina Genome Analyzer II	SRP007650	GEO Series accession: GSE31182	22055183	154075	SRS255416		10090		Mus musculus	SRA043815	public	YES
SRR327030	2011-11-07 10:09:52	25609852	947564524	37	421		unspecified	ftp://ftp-private.ncbi.nlm.nih.gov/sra/sra-instant/reads/ByRun/sra/SRR/SRR327/SRR327030/SRR327030.sra	SRX088967	GSM773069: ZFP57 KO mRNA-seq	RNA-Seq	cDNA	TRANSCRIPTOMIC	SINGLE	0	ILLUMINA	Illumina Genome Analyzer II	SRP007650	GEO Series accession: GSE31182	22055183	154075	SRS255417		10090		Mus musculus	SRA043815	public	YES
SRR330846	2012-04-16 09:06:44	27890656	1059844928	38	790		unspecified	ftp://ftp-private.ncbi.nlm.nih.gov/sra/sra-instant/reads/ByRun/sra/SRR/SRR330/SRR330846/SRR330846.sra	SRX091684	GSM774303: FLDN1_RNA-seq_sample1	RNA-Seq	cDNA	TRANSCRIPTOMIC	SINGLE	0	ILLUMINA	Illumina Genome Analyzer II	SRP007823	GEO Series accession: GSE31234	0	154109	SRS257265		10090		Mus musculus	SRA044988	public	YES
SRR330847	2012-04-16 09:06:44	19259022	731842836	38	541		unspecified	ftp://ftp-private.ncbi.nlm.nih.gov/sra/sra-instant/reads/ByRun/sra/SRR/SRR330/SRR330847/SRR330847.sra	SRX091685	GSM774304: FLDN1_RNA-seq_sample2	RNA-Seq	cDNA	TRANSCRIPTOMIC	SINGLE	0	ILLUMINA	Illumina Genome Analyzer II	SRP007823	GEO Series accession: GSE31234	0	154109	SRS257266		10090		Mus musculus	SRA044988	public	YES
SRR330848	2012-04-16 09:06:44	23958216	910412208	38	525		unspecified	ftp://ftp-private.ncbi.nlm.nih.gov/sra/sra-instant/reads/ByRun/sra/SRR/SRR330/SRR330848/SRR330848.sra	SRX091686	GSM774305: FLDN2a_RNA-seq_sample1	RNA-Seq	cDNA	TRANSCRIPTOMIC	SINGLE	0	ILLUMINA	Illumina Genome Analyzer II	SRP007823	GEO Series accession: GSE31234	0	154109	SRS257267		10090		Mus musculus	SRA044988	public	YES
SRR330849	2012-04-16 09:06:44	33816742	1285036196	38	798		unspecified	ftp://ftp-private.ncbi.nlm.nih.gov/sra/sra-instant/reads/ByRun/sra/SRR/SRR330/SRR330849/SRR330849.sra	SRX091687	GSM774306: FLDN2a_RNA-seq_sample2	RNA-Seq	cDNA	TRANSCRIPTOMIC	SINGLE	0	ILLUMINA	Illumina Genome Analyzer II	SRP007823	GEO Series accession: GSE31234	0	154109	SRS257268		10090		Mus musculus	SRA044988	public	YES
SRR330850	2012-04-16 09:06:44	18538216	704452208	38	525		unspecified	ftp://ftp-private.ncbi.nlm.nih.gov/sra/sra-instant/reads/ByRun/sra/SRR/SRR330/SRR330850/SRR330850.sra	SRX091688	GSM774307: FLDN2b_RNA-seq_sample1	RNA-Seq	cDNA	TRANSCRIPTOMIC	SINGLE	0	ILLUMINA	Illumina Genome Analyzer II	SRP007823	GEO Series accession: GSE31234	0	154109	SRS257269		10090		Mus musculus	SRA044988	public	YES
SRR330851	2012-04-16 09:06:44	18496961	702884518	38	519		unspecified	ftp://ftp-private.ncbi.nlm.nih.gov/sra/sra-instant/reads/ByRun/sra/SRR/SRR330/SRR330851/SRR330851.sra	SRX091689	GSM774308: FLDN2b_RNA-seq_sample2	RNA-Seq	cDNA	TRANSCRIPTOMIC	SINGLE	0	ILLUMINA	Illumina Genome Analyzer II	SRP007823	GEO Series accession: GSE31234	0	154109	SRS257270		10090		Mus musculus	SRA044988	public	YES
SRR330852	2012-04-16 09:06:44	18575391	705864858	38	373		unspecified	ftp://ftp-private.ncbi.nlm.nih.gov/sra/sra-instant/reads/ByRun/sra/SRR/SRR330/SRR330852/SRR330852.sra	SRX091690	GSM774309: FLDN2b_RNA-seq_sample3	RNA-Seq	cDNA	TRANSCRIPTOMIC	SINGLE	0	ILLUMINA	Illumina Genome Analyzer II	SRP007823	GEO Series accession: GSE31234	0	154109	SRS257271		10090		Mus musculus	SRA044988	public	YES
SRR330853	2012-04-16 09:06:44	18689345	710195110	38	520		unspecified	ftp://ftp-private.ncbi.nlm.nih.gov/sra/sra-instant/reads/ByRun/sra/SRR/SRR330/SRR330853/SRR330853.sra	SRX091691	GSM774310: ThyDN3_RNA-seq_sample1	RNA-Seq	cDNA	TRANSCRIPTOMIC	SINGLE	0	ILLUMINA	Illumina Genome Analyzer II	SRP007823	GEO Series accession: GSE31234	0	154109	SRS257272		10090		Mus musculus	SRA044988	public	YES
SRR330854	2012-04-16 09:06:44	23376516	888307608	38	514		unspecified	ftp://ftp-private.ncbi.nlm.nih.gov/sra/sra-instant/reads/ByRun/sra/SRR/SRR330/SRR330854/SRR330854.sra	SRX091692	GSM774311: ThyDN3_RNA-seq_sample2	RNA-Seq	cDNA	TRANSCRIPTOMIC	SINGLE	0	ILLUMINA	Illumina Genome Analyzer II	SRP007823	GEO Series accession: GSE31234	0	154109	SRS257273		10090		Mus musculus	SRA044988	public	YES
SRR330855	2012-04-16 09:06:44	18894429	717988302	38	500		unspecified	ftp://ftp-private.ncbi.nlm.nih.gov/sra/sra-instant/reads/ByRun/sra/SRR/SRR330/SRR330855/SRR330855.sra	SRX091693	GSM774312: ThyDP_RNA-seq_sample1	RNA-Seq	cDNA	TRANSCRIPTOMIC	SINGLE	0	ILLUMINA	Illumina Genome Analyzer II	SRP007823	GEO Series accession: GSE31234	0	154109	SRS257274		10090		Mus musculus	SRA044988	public	YES
SRR330856	2012-04-16 09:06:44	17638690	670270220	38	492		unspecified	ftp://ftp-private.ncbi.nlm.nih.gov/sra/sra-instant/reads/ByRun/sra/SRR/SRR330/SRR330856/SRR330856.sra	SRX091694	GSM774313: ThyDP_RNA-seq_sample2	RNA-Seq	cDNA	TRANSCRIPTOMIC	SINGLE	0	ILLUMINA	Illumina Genome Analyzer II	SRP007823	GEO Series accession: GSE31234	0	154109	SRS257275		10090		Mus musculus	SRA044988	public	YES
SRR331038	2011-09-06 11:15:01	15305209	612208360	40	436		unspecified	ftp://ftp-private.ncbi.nlm.nih.gov/sra/sra-instant/reads/ByRun/sra/SRR/SRR331/SRR331038/SRR331038.sra	SRX091876	GSM774955: ES Timepoint, TAF3 KO, replicate 1	RNA-Seq	cDNA	TRANSCRIPTOMIC	SINGLE	0	ILLUMINA	Illumina Genome Analyzer IIx	SRP007832	GEO Series accession: GSE31271	21884934	154139	SRS257457		10090		Mus musculus	SRA044996	public	YES
SRR331039	2011-09-06 11:15:01	18432861	737314440	40	550		unspecified	ftp://ftp-private.ncbi.nlm.nih.gov/sra/sra-instant/reads/ByRun/sra/SRR/SRR331/SRR331039/SRR331039.sra	SRX091877	GSM774956: ES Timepoint, TAF3 Control, replicate 1	RNA-Seq	cDNA	TRANSCRIPTOMIC	SINGLE	0	ILLUMINA	Illumina Genome Analyzer IIx	SRP007832	GEO Series accession: GSE31271	21884934	154139	SRS257458		10090		Mus musculus	SRA044996	public	YES
SRR331040	2011-09-06 11:15:01	10050075	402003000	40	287		unspecified	ftp://ftp-private.ncbi.nlm.nih.gov/sra/sra-instant/reads/ByRun/sra/SRR/SRR331/SRR331040/SRR331040.sra	SRX091878	GSM774957: ES Timepoint, TAF3 KO, replicate 2	RNA-Seq	cDNA	TRANSCRIPTOMIC	SINGLE	0	ILLUMINA	Illumina Genome Analyzer IIx	SRP007832	GEO Series accession: GSE31271	21884934	154139	SRS257459		10090		Mus musculus	SRA044996	public	YES
SRR331041	2011-09-06 11:15:01	15812032	632481280	40	470		unspecified	ftp://ftp-private.ncbi.nlm.nih.gov/sra/sra-instant/reads/ByRun/sra/SRR/SRR331/SRR331041/SRR331041.sra	SRX091879	GSM774958: ES Timepoint, TAF3 Control, replicate 2	RNA-Seq	cDNA	TRANSCRIPTOMIC	SINGLE	0	ILLUMINA	Illumina Genome Analyzer IIx	SRP007832	GEO Series accession: GSE31271	21884934	154139	SRS257460		10090		Mus musculus	SRA044996	public	YES
SRR331042	2011-09-06 11:15:01	15432125	617285000	40	441		unspecified	ftp://ftp-private.ncbi.nlm.nih.gov/sra/sra-instant/reads/ByRun/sra/SRR/SRR331/SRR331042/SRR331042.sra	SRX091880	GSM774959: EB Day3 Timepoint, TAF3 KO, replicate 1	RNA-Seq	cDNA	TRANSCRIPTOMIC	SINGLE	0	ILLUMINA	Illumina Genome Analyzer IIx	SRP007832	GEO Series accession: GSE31271	21884934	154139	SRS257461		10090		Mus musculus	SRA044996	public	YES
SRR331043	2011-09-06 11:15:01	15897898	635915920	40	492		unspecified	ftp://ftp-private.ncbi.nlm.nih.gov/sra/sra-instant/reads/ByRun/sra/SRR/SRR331/SRR331043/SRR331043.sra	SRX091881	GSM774960: EB Day3 Timepoint, TAF3 Control, replicate 1	RNA-Seq	cDNA	TRANSCRIPTOMIC	SINGLE	0	ILLUMINA	Illumina Genome Analyzer IIx	SRP007832	GEO Series accession: GSE31271	21884934	154139	SRS257462		10090		Mus musculus	SRA044996	public	YES
SRR331044	2011-09-06 11:15:01	17718510	708740400	40	538		unspecified	ftp://ftp-private.ncbi.nlm.nih.gov/sra/sra-instant/reads/ByRun/sra/SRR/SRR331/SRR331044/SRR331044.sra	SRX091882	GSM774961: EB Day3 Timepoint, TAF3 KO, replicate 2	RNA-Seq	cDNA	TRANSCRIPTOMIC	SINGLE	0	ILLUMINA	Illumina Genome Analyzer IIx	SRP007832	GEO Series accession: GSE31271	21884934	154139	SRS257463		10090		Mus musculus	SRA044996	public	YES
SRR331045	2011-09-06 11:15:01	18647872	745914880	40	564		unspecified	ftp://ftp-private.ncbi.nlm.nih.gov/sra/sra-instant/reads/ByRun/sra/SRR/SRR331/SRR331045/SRR331045.sra	SRX091883	GSM774962: EB Day3 Timepoint, TAF3 Control, replicate 2	RNA-Seq	cDNA	TRANSCRIPTOMIC	SINGLE	0	ILLUMINA	Illumina Genome Analyzer IIx	SRP007832	GEO Series accession: GSE31271	21884934	154139	SRS257464		10090		Mus musculus	SRA044996	public	YES
SRR331046	2011-09-06 11:15:01	18542128	741685120	40	551		unspecified	ftp://ftp-private.ncbi.nlm.nih.gov/sra/sra-instant/reads/ByRun/sra/SRR/SRR331/SRR331046/SRR331046.sra	SRX091884	GSM774963: EB Day6 Timepoint, TAF3 KO, replicate 1	RNA-Seq	cDNA	TRANSCRIPTOMIC	SINGLE	0	ILLUMINA	Illumina Genome Analyzer IIx	SRP007832	GEO Series accession: GSE31271	21884934	154139	SRS257465		10090		Mus musculus	SRA044996	public	YES
SRR331047	2011-09-06 11:15:01	18796850	751874000	40	552		unspecified	ftp://ftp-private.ncbi.nlm.nih.gov/sra/sra-instant/reads/ByRun/sra/SRR/SRR331/SRR331047/SRR331047.sra	SRX091885	GSM774964: EB Day6 Timepoint, TAF3 Control, replicate 1	RNA-Seq	cDNA	TRANSCRIPTOMIC	SINGLE	0	ILLUMINA	Illumina Genome Analyzer IIx	SRP007832	GEO Series accession: GSE31271	21884934	154139	SRS257466		10090		Mus musculus	SRA044996	public	YES
SRR331048	2011-09-06 11:15:01	12965429	518617160	40	376		unspecified	ftp://ftp-private.ncbi.nlm.nih.gov/sra/sra-instant/reads/ByRun/sra/SRR/SRR331/SRR331048/SRR331048.sra	SRX091886	GSM774965: EB Day6 Timepoint, TAF3 KO, replicate 2	RNA-Seq	cDNA	TRANSCRIPTOMIC	SINGLE	0	ILLUMINA	Illumina Genome Analyzer IIx	SRP007832	GEO Series accession: GSE31271	21884934	154139	SRS257467		10090		Mus musculus	SRA044996	public	YES
SRR331049	2011-09-06 11:15:01	14281292	571251680	40	418		unspecified	ftp://ftp-private.ncbi.nlm.nih.gov/sra/sra-instant/reads/ByRun/sra/SRR/SRR331/SRR331049/SRR331049.sra	SRX091887	GSM774966: EB Day6 Timepoint, TAF3 Control, replicate 2	RNA-Seq	cDNA	TRANSCRIPTOMIC	SINGLE	0	ILLUMINA	Illumina Genome Analyzer IIx	SRP007832	GEO Series accession: GSE31271	21884934	154139	SRS257468		10090		Mus musculus	SRA044996	public	YES
SRR331050	2011-09-06 11:15:01	31006380	4712969760	152	2848		unspecified	ftp://ftp-private.ncbi.nlm.nih.gov/sra/sra-instant/reads/ByRun/sra/SRR/SRR331/SRR331050/SRR331050.sra	SRX091888	GSM774967: ES Timepoint, TAF3 KO, PE, replicate 1	RNA-Seq	cDNA	TRANSCRIPTOMIC	PAIRED	240	ILLUMINA	Illumina Genome Analyzer IIx	SRP007832	GEO Series accession: GSE31271	21884934	154139	SRS257469		10090		Mus musculus	SRA044996	public	YES
SRR331051	2011-09-06 11:15:01	30192850	4589313200	152	2770		unspecified	ftp://ftp-private.ncbi.nlm.nih.gov/sra/sra-instant/reads/ByRun/sra/SRR/SRR331/SRR331051/SRR331051.sra	SRX091889	GSM774968: ES Timepoint, TAF3 Control, PE, replicate 1	RNA-Seq	cDNA	TRANSCRIPTOMIC	PAIRED	240	ILLUMINA	Illumina Genome Analyzer IIx	SRP007832	GEO Series accession: GSE31271	21884934	154139	SRS257470		10090		Mus musculus	SRA044996	public	YES
SRR331052	2011-09-06 11:15:01	31519764	4791004128	152	2868		unspecified	ftp://ftp-private.ncbi.nlm.nih.gov/sra/sra-instant/reads/ByRun/sra/SRR/SRR331/SRR331052/SRR331052.sra	SRX091890	GSM774969: ES Timepoint, TAF3 KO, PE, replicate 2	RNA-Seq	cDNA	TRANSCRIPTOMIC	PAIRED	240	ILLUMINA	Illumina Genome Analyzer IIx	SRP007832	GEO Series accession: GSE31271	21884934	154139	SRS257471		10090		Mus musculus	SRA044996	public	YES
SRR331053	2011-09-06 11:15:01	32153052	4887263904	152	3065		unspecified	ftp://ftp-private.ncbi.nlm.nih.gov/sra/sra-instant/reads/ByRun/sra/SRR/SRR331/SRR331053/SRR331053.sra	SRX091891	GSM774970: ES Timepoint, TAF3 Control, PE, replicate 2	RNA-Seq	cDNA	TRANSCRIPTOMIC	PAIRED	240	ILLUMINA	Illumina Genome Analyzer IIx	SRP007832	GEO Series accession: GSE31271	21884934	154139	SRS257472		10090		Mus musculus	SRA044996	public	YES
SRR453077	2012-04-03 13:45:11	16193075	2461347400	152	1300		unspecified	ftp://ftp-private.ncbi.nlm.nih.gov/sra/sra-instant/reads/ByRun/sra/SRR/SRR453/SRR453077/SRR453077.sra	SRX135150	GSM900183: CSHL_RnaSeq_Ovary_adult-8wks	RNA-Seq	cDNA	OTHER	PAIRED	0	ILLUMINA	Illumina Genome Analyzer II	SRP012040	GEO Series accession: GSE36025	0	66167	SRS307248		10090		Mus musculus	SRA051399	public	YES
SRR453078	2012-04-03 13:35:12	11964530	1818608560	152	1015		unspecified	ftp://ftp-private.ncbi.nlm.nih.gov/sra/sra-instant/reads/ByRun/sra/SRR/SRR453/SRR453078/SRR453078.sra	SRX135150	GSM900183: CSHL_RnaSeq_Ovary_adult-8wks	RNA-Seq	cDNA	OTHER	PAIRED	0	ILLUMINA	Illumina Genome Analyzer II	SRP012040	GEO Series accession: GSE36025	0	66167	SRS307248		10090		Mus musculus	SRA051399	public	YES
SRR453079	2012-04-03 13:20:11	5093422	774200144	152	440		unspecified	ftp://ftp-private.ncbi.nlm.nih.gov/sra/sra-instant/reads/ByRun/sra/SRR/SRR453/SRR453079/SRR453079.sra	SRX135150	GSM900183: CSHL_RnaSeq_Ovary_adult-8wks	RNA-Seq	cDNA	OTHER	PAIRED	0	ILLUMINA	Illumina Genome Analyzer II	SRP012040	GEO Series accession: GSE36025	0	66167	SRS307248		10090		Mus musculus	SRA051399	public	YES
SRR453080	2012-04-03 13:33:11	11144283	1693931016	152	929		unspecified	ftp://ftp-private.ncbi.nlm.nih.gov/sra/sra-instant/reads/ByRun/sra/SRR/SRR453/SRR453080/SRR453080.sra	SRX135150	GSM900183: CSHL_RnaSeq_Ovary_adult-8wks	RNA-Seq	cDNA	OTHER	PAIRED	0	ILLUMINA	Illumina Genome Analyzer II	SRP012040	GEO Series accession: GSE36025	0	66167	SRS307248		10090		Mus musculus	SRA051399	public	YES
SRR453081	2012-04-03 13:33:11	11103625	1687751000	152	948		unspecified	ftp://ftp-private.ncbi.nlm.nih.gov/sra/sra-instant/reads/ByRun/sra/SRR/SRR453/SRR453081/SRR453081.sra	SRX135150	GSM900183: CSHL_RnaSeq_Ovary_adult-8wks	RNA-Seq	cDNA	OTHER	PAIRED	0	ILLUMINA	Illumina Genome Analyzer II	SRP012040	GEO Series accession: GSE36025	0	66167	SRS307248		10090		Mus musculus	SRA051399	public	YES
SRR453082	2012-04-03 13:23:15	10339874	1571660848	152	874		unspecified	ftp://ftp-private.ncbi.nlm.nih.gov/sra/sra-instant/reads/ByRun/sra/SRR/SRR453/SRR453082/SRR453082.sra	SRX135150	GSM900183: CSHL_RnaSeq_Ovary_adult-8wks	RNA-Seq	cDNA	OTHER	PAIRED	0	ILLUMINA	Illumina Genome Analyzer II	SRP012040	GEO Series accession: GSE36025	0	66167	SRS307248		10090		Mus musculus	SRA051399	public	YES
SRR453083	2012-04-03 13:28:11	10721464	1629662528	152	957		unspecified	ftp://ftp-private.ncbi.nlm.nih.gov/sra/sra-instant/reads/ByRun/sra/SRR/SRR453/SRR453083/SRR453083.sra	SRX135150	GSM900183: CSHL_RnaSeq_Ovary_adult-8wks	RNA-Seq	cDNA	OTHER	PAIRED	0	ILLUMINA	Illumina Genome Analyzer II	SRP012040	GEO Series accession: GSE36025	0	66167	SRS307248		10090		Mus musculus	SRA051399	public	YES
SRR453084	2012-04-03 13:22:10	7576027	1151556104	152	653		unspecified	ftp://ftp-private.ncbi.nlm.nih.gov/sra/sra-instant/reads/ByRun/sra/SRR/SRR453/SRR453084/SRR453084.sra	SRX135150	GSM900183: CSHL_RnaSeq_Ovary_adult-8wks	RNA-Seq	cDNA	OTHER	PAIRED	0	ILLUMINA	Illumina Genome Analyzer II	SRP012040	GEO Series accession: GSE36025	0	66167	SRS307248		10090		Mus musculus	SRA051399	public	YES
SRR453085	2012-04-03 13:30:11	10566187	1606060424	152	951		unspecified	ftp://ftp-private.ncbi.nlm.nih.gov/sra/sra-instant/reads/ByRun/sra/SRR/SRR453/SRR453085/SRR453085.sra	SRX135150	GSM900183: CSHL_RnaSeq_Ovary_adult-8wks	RNA-Seq	cDNA	OTHER	PAIRED	0	ILLUMINA	Illumina Genome Analyzer II	SRP012040	GEO Series accession: GSE36025	0	66167	SRS307248		10090		Mus musculus	SRA051399	public	YES
SRR453086	2012-04-03 13:33:11	10974570	1668134640	152	977		unspecified	ftp://ftp-private.ncbi.nlm.nih.gov/sra/sra-instant/reads/ByRun/sra/SRR/SRR453/SRR453086/SRR453086.sra	SRX135150	GSM900183: CSHL_RnaSeq_Ovary_adult-8wks	RNA-Seq	cDNA	OTHER	PAIRED	0	ILLUMINA	Illumina Genome Analyzer II	SRP012040	GEO Series accession: GSE36025	0	66167	SRS307248		10090		Mus musculus	SRA051399	public	YES
SRR453087	2012-04-03 14:19:13	17863092	2715189984	152	1897		unspecified	ftp://ftp-private.ncbi.nlm.nih.gov/sra/sra-instant/reads/ByRun/sra/SRR/SRR453/SRR453087/SRR453087.sra	SRX135151	GSM900184: CSHL_RnaSeq_MammaryGland_adult-8wks	RNA-Seq	cDNA	OTHER	PAIRED	0	ILLUMINA	Illumina Genome Analyzer II	SRP012040	GEO Series accession: GSE36025	0	66167	SRS307249		10090		Mus musculus	SRA051399	public	YES
SRR453088	2012-04-03 17:27:19	29457531	4477544712	152	3121		unspecified	ftp://ftp-private.ncbi.nlm.nih.gov/sra/sra-instant/reads/ByRun/sra/SRR/SRR453/SRR453088/SRR453088.sra	SRX135151	GSM900184: CSHL_RnaSeq_MammaryGland_adult-8wks	RNA-Seq	cDNA	OTHER	PAIRED	0	ILLUMINA	Illumina Genome Analyzer II	SRP012040	GEO Series accession: GSE36025	0	66167	SRS307249		10090		Mus musculus	SRA051399	public	YES
SRR453089	2012-04-03 20:07:23	38365471	5831551592	152	3831		unspecified	ftp://ftp-private.ncbi.nlm.nih.gov/sra/sra-instant/reads/ByRun/sra/SRR/SRR453/SRR453089/SRR453089.sra	SRX135151	GSM900184: CSHL_RnaSeq_MammaryGland_adult-8wks	RNA-Seq	cDNA	OTHER	PAIRED	0	ILLUMINA	Illumina Genome Analyzer II	SRP012040	GEO Series accession: GSE36025	0	66167	SRS307249		10090		Mus musculus	SRA051399	public	YES
SRR453090	2012-04-03 14:05:10	17706560	2691397120	152	1600		unspecified	ftp://ftp-private.ncbi.nlm.nih.gov/sra/sra-instant/reads/ByRun/sra/SRR/SRR453/SRR453090/SRR453090.sra	SRX135151	GSM900184: CSHL_RnaSeq_MammaryGland_adult-8wks	RNA-Seq	cDNA	OTHER	PAIRED	0	ILLUMINA	Illumina Genome Analyzer II	SRP012040	GEO Series accession: GSE36025	0	66167	SRS307249		10090		Mus musculus	SRA051399	public	YES
SRR453091	2012-04-03 13:48:11	15091909	2293970168	152	1312		unspecified	ftp://ftp-private.ncbi.nlm.nih.gov/sra/sra-instant/reads/ByRun/sra/SRR/SRR453/SRR453091/SRR453091.sra	SRX135151	GSM900184: CSHL_RnaSeq_MammaryGland_adult-8wks	RNA-Seq	cDNA	OTHER	PAIRED	0	ILLUMINA	Illumina Genome Analyzer II	SRP012040	GEO Series accession: GSE36025	0	66167	SRS307249		10090		Mus musculus	SRA051399	public	YES
SRR453092	2012-04-03 16:14:11	28518055	4334744360	152	2527		unspecified	ftp://ftp-private.ncbi.nlm.nih.gov/sra/sra-instant/reads/ByRun/sra/SRR/SRR453/SRR453092/SRR453092.sra	SRX135151	GSM900184: CSHL_RnaSeq_MammaryGland_adult-8wks	RNA-Seq	cDNA	OTHER	PAIRED	0	ILLUMINA	Illumina Genome Analyzer II	SRP012040	GEO Series accession: GSE36025	0	66167	SRS307249		10090		Mus musculus	SRA051399	public	YES
SRR453093	2012-04-03 15:27:12	26247173	3989570296	152	2247		unspecified	ftp://ftp-private.ncbi.nlm.nih.gov/sra/sra-instant/reads/ByRun/sra/SRR/SRR453/SRR453093/SRR453093.sra	SRX135152	GSM900185: CSHL_RnaSeq_Stomach_adult-8wks	RNA-Seq	cDNA	OTHER	PAIRED	0	ILLUMINA	Illumina Genome Analyzer II	SRP012040	GEO Series accession: GSE36025	0	66167	SRS307250		10090		Mus musculus	SRA051399	public	YES
SRR453094	2012-04-03 15:51:14	27117124	4121802848	152	2463		unspecified	ftp://ftp-private.ncbi.nlm.nih.gov/sra/sra-instant/reads/ByRun/sra/SRR/SRR453/SRR453094/SRR453094.sra	SRX135152	GSM900185: CSHL_RnaSeq_Stomach_adult-8wks	RNA-Seq	cDNA	OTHER	PAIRED	0	ILLUMINA	Illumina Genome Analyzer II	SRP012040	GEO Series accession: GSE36025	0	66167	SRS307250		10090		Mus musculus	SRA051399	public	YES
SRR453095	2012-04-03 14:36:15	24350661	3701300472	152	2063		unspecified	ftp://ftp-private.ncbi.nlm.nih.gov/sra/sra-instant/reads/ByRun/sra/SRR/SRR453/SRR453095/SRR453095.sra	SRX135152	GSM900185: CSHL_RnaSeq_Stomach_adult-8wks	RNA-Seq	cDNA	OTHER	PAIRED	0	ILLUMINA	Illumina Genome Analyzer II	SRP012040	GEO Series accession: GSE36025	0	66167	SRS307250		10090		Mus musculus	SRA051399	public	YES
SRR453096	2012-04-03 16:03:12	29667455	4509453160	152	2561		unspecified	ftp://ftp-private.ncbi.nlm.nih.gov/sra/sra-instant/reads/ByRun/sra/SRR/SRR453/SRR453096/SRR453096.sra	SRX135152	GSM900185: CSHL_RnaSeq_Stomach_adult-8wks	RNA-Seq	cDNA	OTHER	PAIRED	0	ILLUMINA	Illumina Genome Analyzer II	SRP012040	GEO Series accession: GSE36025	0	66167	SRS307250		10090		Mus musculus	SRA051399	public	YES
SRR453097	2012-04-03 17:18:22	33861022	5146875344	152	3122		unspecified	ftp://ftp-private.ncbi.nlm.nih.gov/sra/sra-instant/reads/ByRun/sra/SRR/SRR453/SRR453097/SRR453097.sra	SRX135152	GSM900185: CSHL_RnaSeq_Stomach_adult-8wks	RNA-Seq	cDNA	OTHER	PAIRED	0	ILLUMINA	Illumina Genome Analyzer II	SRP012040	GEO Series accession: GSE36025	0	66167	SRS307250		10090		Mus musculus	SRA051399	public	YES
SRR453098	2012-04-03 15:25:14	27307130	4150683760	152	2335		unspecified	ftp://ftp-private.ncbi.nlm.nih.gov/sra/sra-instant/reads/ByRun/sra/SRR/SRR453/SRR453098/SRR453098.sra	SRX135152	GSM900185: CSHL_RnaSeq_Stomach_adult-8wks	RNA-Seq	cDNA	OTHER	PAIRED	0	ILLUMINA	Illumina Genome Analyzer II	SRP012040	GEO Series accession: GSE36025	0	66167	SRS307250		10090		Mus musculus	SRA051399	public	YES
SRR453099	2012-04-03 14:08:11	19631252	2983950304	152	1758		unspecified	ftp://ftp-private.ncbi.nlm.nih.gov/sra/sra-instant/reads/ByRun/sra/SRR/SRR453/SRR453099/SRR453099.sra	SRX135153	GSM900186: CSHL_RnaSeq_SmIntestine_adult-8wks	RNA-Seq	cDNA	OTHER	PAIRED	0	ILLUMINA	Illumina Genome Analyzer II	SRP012040	GEO Series accession: GSE36025	0	66167	SRS307251		10090		Mus musculus	SRA051399	public	YES
SRR453100	2012-04-03 13:56:10	17959351	2729821352	152	1618		unspecified	ftp://ftp-private.ncbi.nlm.nih.gov/sra/sra-instant/reads/ByRun/sra/SRR/SRR453/SRR453100/SRR453100.sra	SRX135153	GSM900186: CSHL_RnaSeq_SmIntestine_adult-8wks	RNA-Seq	cDNA	OTHER	PAIRED	0	ILLUMINA	Illumina Genome Analyzer II	SRP012040	GEO Series accession: GSE36025	0	66167	SRS307251		10090		Mus musculus	SRA051399	public	YES
SRR453101	2012-04-03 13:17:11	6919337	1051739224	152	584		unspecified	ftp://ftp-private.ncbi.nlm.nih.gov/sra/sra-instant/reads/ByRun/sra/SRR/SRR453/SRR453101/SRR453101.sra	SRX135153	GSM900186: CSHL_RnaSeq_SmIntestine_adult-8wks	RNA-Seq	cDNA	OTHER	PAIRED	0	ILLUMINA	Illumina Genome Analyzer II	SRP012040	GEO Series accession: GSE36025	0	66167	SRS307251		10090		Mus musculus	SRA051399	public	YES
SRR453102	2012-04-03 13:37:11	12967048	1970991296	152	1122		unspecified	ftp://ftp-private.ncbi.nlm.nih.gov/sra/sra-instant/reads/ByRun/sra/SRR/SRR453/SRR453102/SRR453102.sra	SRX135153	GSM900186: CSHL_RnaSeq_SmIntestine_adult-8wks	RNA-Seq	cDNA	OTHER	PAIRED	0	ILLUMINA	Illumina Genome Analyzer II	SRP012040	GEO Series accession: GSE36025	0	66167	SRS307251		10090		Mus musculus	SRA051399	public	YES
SRR453103	2012-04-03 13:37:11	12809643	1947065736	152	1094		unspecified	ftp://ftp-private.ncbi.nlm.nih.gov/sra/sra-instant/reads/ByRun/sra/SRR/SRR453/SRR453103/SRR453103.sra	SRX135153	GSM900186: CSHL_RnaSeq_SmIntestine_adult-8wks	RNA-Seq	cDNA	OTHER	PAIRED	0	ILLUMINA	Illumina Genome Analyzer II	SRP012040	GEO Series accession: GSE36025	0	66167	SRS307251		10090		Mus musculus	SRA051399	public	YES
SRR453104	2012-04-03 14:02:10	18211911	2768210472	152	1606		unspecified	ftp://ftp-private.ncbi.nlm.nih.gov/sra/sra-instant/reads/ByRun/sra/SRR/SRR453/SRR453104/SRR453104.sra	SRX135153	GSM900186: CSHL_RnaSeq_SmIntestine_adult-8wks	RNA-Seq	cDNA	OTHER	PAIRED	0	ILLUMINA	Illumina Genome Analyzer II	SRP012040	GEO Series accession: GSE36025	0	66167	SRS307251		10090		Mus musculus	SRA051399	public	YES
SRR453105	2012-04-03 13:53:11	16967223	2579017896	152	1500		unspecified	ftp://ftp-private.ncbi.nlm.nih.gov/sra/sra-instant/reads/ByRun/sra/SRR/SRR453/SRR453105/SRR453105.sra	SRX135153	GSM900186: CSHL_RnaSeq_SmIntestine_adult-8wks	RNA-Seq	cDNA	OTHER	PAIRED	0	ILLUMINA	Illumina Genome Analyzer II	SRP012040	GEO Series accession: GSE36025	0	66167	SRS307251		10090		Mus musculus	SRA051399	public	YES
SRR453106	2012-04-03 13:18:12	5741962	872778224	152	472		unspecified	ftp://ftp-private.ncbi.nlm.nih.gov/sra/sra-instant/reads/ByRun/sra/SRR/SRR453/SRR453106/SRR453106.sra	SRX135153	GSM900186: CSHL_RnaSeq_SmIntestine_adult-8wks	RNA-Seq	cDNA	OTHER	PAIRED	0	ILLUMINA	Illumina Genome Analyzer II	SRP012040	GEO Series accession: GSE36025	0	66167	SRS307251		10090		Mus musculus	SRA051399	public	YES
SRR453107	2012-04-03 13:39:11	13074061	1987257272	152	1118		unspecified	ftp://ftp-private.ncbi.nlm.nih.gov/sra/sra-instant/reads/ByRun/sra/SRR/SRR453/SRR453107/SRR453107.sra	SRX135153	GSM900186: CSHL_RnaSeq_SmIntestine_adult-8wks	RNA-Seq	cDNA	OTHER	PAIRED	0	ILLUMINA	Illumina Genome Analyzer II	SRP012040	GEO Series accession: GSE36025	0	66167	SRS307251		10090		Mus musculus	SRA051399	public	YES
SRR453108	2012-04-03 13:43:12	13775140	2093821280	152	1148		unspecified	ftp://ftp-private.ncbi.nlm.nih.gov/sra/sra-instant/reads/ByRun/sra/SRR/SRR453/SRR453108/SRR453108.sra	SRX135153	GSM900186: CSHL_RnaSeq_SmIntestine_adult-8wks	RNA-Seq	cDNA	OTHER	PAIRED	0	ILLUMINA	Illumina Genome Analyzer II	SRP012040	GEO Series accession: GSE36025	0	66167	SRS307251		10090		Mus musculus	SRA051399	public	YES
SRR453109	2012-04-03 15:33:19	26175550	3978683600	152	2296		unspecified	ftp://ftp-private.ncbi.nlm.nih.gov/sra/sra-instant/reads/ByRun/sra/SRR/SRR453/SRR453109/SRR453109.sra	SRX135154	GSM900187: CSHL_RnaSeq_Duodenum_adult-8wks	RNA-Seq	cDNA	OTHER	PAIRED	0	ILLUMINA	Illumina Genome Analyzer II	SRP012040	GEO Series accession: GSE36025	0	66167	SRS307252		10090		Mus musculus	SRA051399	public	YES
SRR453110	2012-04-03 16:05:12	27587328	4193273856	152	2545		unspecified	ftp://ftp-private.ncbi.nlm.nih.gov/sra/sra-instant/reads/ByRun/sra/SRR/SRR453/SRR453110/SRR453110.sra	SRX135154	GSM900187: CSHL_RnaSeq_Duodenum_adult-8wks	RNA-Seq	cDNA	OTHER	PAIRED	0	ILLUMINA	Illumina Genome Analyzer II	SRP012040	GEO Series accession: GSE36025	0	66167	SRS307252		10090		Mus musculus	SRA051399	public	YES
SRR453111	2012-04-03 14:24:11	23122310	3514591120	152	1972		unspecified	ftp://ftp-private.ncbi.nlm.nih.gov/sra/sra-instant/reads/ByRun/sra/SRR/SRR453/SRR453111/SRR453111.sra	SRX135154	GSM900187: CSHL_RnaSeq_Duodenum_adult-8wks	RNA-Seq	cDNA	OTHER	PAIRED	0	ILLUMINA	Illumina Genome Analyzer II	SRP012040	GEO Series accession: GSE36025	0	66167	SRS307252		10090		Mus musculus	SRA051399	public	YES
SRR453112	2012-04-03 13:15:10	15183301	2307861752	152	1273		unspecified	ftp://ftp-private.ncbi.nlm.nih.gov/sra/sra-instant/reads/ByRun/sra/SRR/SRR453/SRR453112/SRR453112.sra	SRX135154	GSM900187: CSHL_RnaSeq_Duodenum_adult-8wks	RNA-Seq	cDNA	OTHER	PAIRED	0	ILLUMINA	Illumina Genome Analyzer II	SRP012040	GEO Series accession: GSE36025	0	66167	SRS307252		10090		Mus musculus	SRA051399	public	YES
SRR453113	2012-04-03 15:09:14	23888198	3631006096	152	2180		unspecified	ftp://ftp-private.ncbi.nlm.nih.gov/sra/sra-instant/reads/ByRun/sra/SRR/SRR453/SRR453113/SRR453113.sra	SRX135154	GSM900187: CSHL_RnaSeq_Duodenum_adult-8wks	RNA-Seq	cDNA	OTHER	PAIRED	0	ILLUMINA	Illumina Genome Analyzer II	SRP012040	GEO Series accession: GSE36025	0	66167	SRS307252		10090		Mus musculus	SRA051399	public	YES
SRR453114	2012-04-03 13:20:11	17258686	2623320272	152	1438		unspecified	ftp://ftp-private.ncbi.nlm.nih.gov/sra/sra-instant/reads/ByRun/sra/SRR/SRR453/SRR453114/SRR453114.sra	SRX135154	GSM900187: CSHL_RnaSeq_Duodenum_adult-8wks	RNA-Seq	cDNA	OTHER	PAIRED	0	ILLUMINA	Illumina Genome Analyzer II	SRP012040	GEO Series accession: GSE36025	0	66167	SRS307252		10090		Mus musculus	SRA051399	public	YES
SRR453115	2012-04-03 14:46:59	22692382	3449242064	152	2042		unspecified	ftp://ftp-private.ncbi.nlm.nih.gov/sra/sra-instant/reads/ByRun/sra/SRR/SRR453/SRR453115/SRR453115.sra	SRX135154	GSM900187: CSHL_RnaSeq_Duodenum_adult-8wks	RNA-Seq	cDNA	OTHER	PAIRED	0	ILLUMINA	Illumina Genome Analyzer II	SRP012040	GEO Series accession: GSE36025	0	66167	SRS307252		10090		Mus musculus	SRA051399	public	YES
SRR453116	2012-04-03 15:15:18	24290092	3692093984	152	2135		unspecified	ftp://ftp-private.ncbi.nlm.nih.gov/sra/sra-instant/reads/ByRun/sra/SRR/SRR453/SRR453116/SRR453116.sra	SRX135155	GSM900188: CSHL_RnaSeq_Adrenal_adult-8wks	RNA-Seq	cDNA	OTHER	PAIRED	0	ILLUMINA	Illumina Genome Analyzer II	SRP012040	GEO Series accession: GSE36025	0	66167	SRS307253		10090		Mus musculus	SRA051399	public	YES
SRR453117	2012-04-03 14:55:22	24312747	3695537544	152	2070		unspecified	ftp://ftp-private.ncbi.nlm.nih.gov/sra/sra-instant/reads/ByRun/sra/SRR/SRR453/SRR453117/SRR453117.sra	SRX135155	GSM900188: CSHL_RnaSeq_Adrenal_adult-8wks	RNA-Seq	cDNA	OTHER	PAIRED	0	ILLUMINA	Illumina Genome Analyzer II	SRP012040	GEO Series accession: GSE36025	0	66167	SRS307253		10090		Mus musculus	SRA051399	public	YES
SRR453118	2012-04-03 14:51:54	24008508	3649293216	152	2067		unspecified	ftp://ftp-private.ncbi.nlm.nih.gov/sra/sra-instant/reads/ByRun/sra/SRR/SRR453/SRR453118/SRR453118.sra	SRX135155	GSM900188: CSHL_RnaSeq_Adrenal_adult-8wks	RNA-Seq	cDNA	OTHER	PAIRED	0	ILLUMINA	Illumina Genome Analyzer II	SRP012040	GEO Series accession: GSE36025	0	66167	SRS307253		10090		Mus musculus	SRA051399	public	YES
SRR453119	2012-04-03 15:39:11	25918689	3939640728	152	2266		unspecified	ftp://ftp-private.ncbi.nlm.nih.gov/sra/sra-instant/reads/ByRun/sra/SRR/SRR453/SRR453119/SRR453119.sra	SRX135155	GSM900188: CSHL_RnaSeq_Adrenal_adult-8wks	RNA-Seq	cDNA	OTHER	PAIRED	0	ILLUMINA	Illumina Genome Analyzer II	SRP012040	GEO Series accession: GSE36025	0	66167	SRS307253		10090		Mus musculus	SRA051399	public	YES
SRR453120	2012-04-03 16:01:13	26737304	4064070208	152	2465		unspecified	ftp://ftp-private.ncbi.nlm.nih.gov/sra/sra-instant/reads/ByRun/sra/SRR/SRR453/SRR453120/SRR453120.sra	SRX135155	GSM900188: CSHL_RnaSeq_Adrenal_adult-8wks	RNA-Seq	cDNA	OTHER	PAIRED	0	ILLUMINA	Illumina Genome Analyzer II	SRP012040	GEO Series accession: GSE36025	0	66167	SRS307253		10090		Mus musculus	SRA051399	public	YES
SRR453121	2012-04-03 14:30:16	23024785	3499767320	152	1988		unspecified	ftp://ftp-private.ncbi.nlm.nih.gov/sra/sra-instant/reads/ByRun/sra/SRR/SRR453/SRR453121/SRR453121.sra	SRX135155	GSM900188: CSHL_RnaSeq_Adrenal_adult-8wks	RNA-Seq	cDNA	OTHER	PAIRED	0	ILLUMINA	Illumina Genome Analyzer II	SRP012040	GEO Series accession: GSE36025	0	66167	SRS307253		10090		Mus musculus	SRA051399	public	YES
SRR453122	2012-04-03 19:05:30	36981419	5621175688	152	3465		unspecified	ftp://ftp-private.ncbi.nlm.nih.gov/sra/sra-instant/reads/ByRun/sra/SRR/SRR453/SRR453122/SRR453122.sra	SRX135156	GSM900189: CSHL_RnaSeq_LgIntestine_adult-8wks	RNA-Seq	cDNA	OTHER	PAIRED	0	ILLUMINA	Illumina Genome Analyzer II	SRP012040	GEO Series accession: GSE36025	0	66167	SRS307254		10090		Mus musculus	SRA051399	public	YES
SRR453123	2012-04-03 18:33:20	35017114	5322601328	152	3374		unspecified	ftp://ftp-private.ncbi.nlm.nih.gov/sra/sra-instant/reads/ByRun/sra/SRR/SRR453/SRR453123/SRR453123.sra	SRX135156	GSM900189: CSHL_RnaSeq_LgIntestine_adult-8wks	RNA-Seq	cDNA	OTHER	PAIRED	0	ILLUMINA	Illumina Genome Analyzer II	SRP012040	GEO Series accession: GSE36025	0	66167	SRS307254		10090		Mus musculus	SRA051399	public	YES
SRR453124	2012-04-03 20:55:36	39076854	5939681808	152	3881		unspecified	ftp://ftp-private.ncbi.nlm.nih.gov/sra/sra-instant/reads/ByRun/sra/SRR/SRR453/SRR453124/SRR453124.sra	SRX135156	GSM900189: CSHL_RnaSeq_LgIntestine_adult-8wks	RNA-Seq	cDNA	OTHER	PAIRED	0	ILLUMINA	Illumina Genome Analyzer II	SRP012040	GEO Series accession: GSE36025	0	66167	SRS307254		10090		Mus musculus	SRA051399	public	YES
SRR453125	2012-04-03 19:36:47	37540760	5706195520	152	3580		unspecified	ftp://ftp-private.ncbi.nlm.nih.gov/sra/sra-instant/reads/ByRun/sra/SRR/SRR453/SRR453125/SRR453125.sra	SRX135156	GSM900189: CSHL_RnaSeq_LgIntestine_adult-8wks	RNA-Seq	cDNA	OTHER	PAIRED	0	ILLUMINA	Illumina Genome Analyzer II	SRP012040	GEO Series accession: GSE36025	0	66167	SRS307254		10090		Mus musculus	SRA051399	public	YES
SRR453126	2012-04-03 20:48:33	38631103	5871927656	152	3704		unspecified	ftp://ftp-private.ncbi.nlm.nih.gov/sra/sra-instant/reads/ByRun/sra/SRR/SRR453/SRR453126/SRR453126.sra	SRX135157	GSM900190: CSHL_RnaSeq_GenitalFatPad_adult-8wks	RNA-Seq	cDNA	OTHER	PAIRED	0	ILLUMINA	Illumina Genome Analyzer II	SRP012040	GEO Series accession: GSE36025	0	66167	SRS307255		10090		Mus musculus	SRA051399	public	YES
SRR453127	2012-04-03 16:52:21	30743993	4673086936	152	2708		unspecified	ftp://ftp-private.ncbi.nlm.nih.gov/sra/sra-instant/reads/ByRun/sra/SRR/SRR453/SRR453127/SRR453127.sra	SRX135157	GSM900190: CSHL_RnaSeq_GenitalFatPad_adult-8wks	RNA-Seq	cDNA	OTHER	PAIRED	0	ILLUMINA	Illumina Genome Analyzer II	SRP012040	GEO Series accession: GSE36025	0	66167	SRS307255		10090		Mus musculus	SRA051399	public	YES
SRR453128	2012-04-03 21:12:29	39388225	5987010200	152	4051		unspecified	ftp://ftp-private.ncbi.nlm.nih.gov/sra/sra-instant/reads/ByRun/sra/SRR/SRR453/SRR453128/SRR453128.sra	SRX135157	GSM900190: CSHL_RnaSeq_GenitalFatPad_adult-8wks	RNA-Seq	cDNA	OTHER	PAIRED	0	ILLUMINA	Illumina Genome Analyzer II	SRP012040	GEO Series accession: GSE36025	0	66167	SRS307255		10090		Mus musculus	SRA051399	public	YES
SRR453129	2012-04-03 20:08:30	39203401	5958916952	152	3680		unspecified	ftp://ftp-private.ncbi.nlm.nih.gov/sra/sra-instant/reads/ByRun/sra/SRR/SRR453/SRR453129/SRR453129.sra	SRX135157	GSM900190: CSHL_RnaSeq_GenitalFatPad_adult-8wks	RNA-Seq	cDNA	OTHER	PAIRED	0	ILLUMINA	Illumina Genome Analyzer II	SRP012040	GEO Series accession: GSE36025	0	66167	SRS307255		10090		Mus musculus	SRA051399	public	YES
SRR453130	2012-04-03 21:08:56	40067281	6090226712	152	3887		unspecified	ftp://ftp-private.ncbi.nlm.nih.gov/sra/sra-instant/reads/ByRun/sra/SRR/SRR453/SRR453130/SRR453130.sra	SRX135158	GSM900191: CSHL_RnaSeq_SubcFatPad_adult-8wks	RNA-Seq	cDNA	OTHER	PAIRED	0	ILLUMINA	Illumina Genome Analyzer II	SRP012040	GEO Series accession: GSE36025	0	66167	SRS307256		10090		Mus musculus	SRA051399	public	YES
SRR453131	2012-04-03 20:30:28	38254999	5814759848	152	3788		unspecified	ftp://ftp-private.ncbi.nlm.nih.gov/sra/sra-instant/reads/ByRun/sra/SRR/SRR453/SRR453131/SRR453131.sra	SRX135158	GSM900191: CSHL_RnaSeq_SubcFatPad_adult-8wks	RNA-Seq	cDNA	OTHER	PAIRED	0	ILLUMINA	Illumina Genome Analyzer II	SRP012040	GEO Series accession: GSE36025	0	66167	SRS307256		10090		Mus musculus	SRA051399	public	YES
SRR453132	2012-04-03 21:01:36	38677923	5879044296	152	3933		unspecified	ftp://ftp-private.ncbi.nlm.nih.gov/sra/sra-instant/reads/ByRun/sra/SRR/SRR453/SRR453132/SRR453132.sra	SRX135158	GSM900191: CSHL_RnaSeq_SubcFatPad_adult-8wks	RNA-Seq	cDNA	OTHER	PAIRED	0	ILLUMINA	Illumina Genome Analyzer II	SRP012040	GEO Series accession: GSE36025	0	66167	SRS307256		10090		Mus musculus	SRA051399	public	YES
SRR453133	2012-04-03 20:21:35	40166941	6105375032	152	3737		unspecified	ftp://ftp-private.ncbi.nlm.nih.gov/sra/sra-instant/reads/ByRun/sra/SRR/SRR453/SRR453133/SRR453133.sra	SRX135158	GSM900191: CSHL_RnaSeq_SubcFatPad_adult-8wks	RNA-Seq	cDNA	OTHER	PAIRED	0	ILLUMINA	Illumina Genome Analyzer II	SRP012040	GEO Series accession: GSE36025	0	66167	SRS307256		10090		Mus musculus	SRA051399	public	YES
SRR453134	2012-04-03 13:40:11	13474342	2048099984	152	998		unspecified	ftp://ftp-private.ncbi.nlm.nih.gov/sra/sra-instant/reads/ByRun/sra/SRR/SRR453/SRR453134/SRR453134.sra	SRX135159	GSM900192: CSHL_RnaSeq_Thymus_adult-8wks	RNA-Seq	cDNA	OTHER	PAIRED	0	ILLUMINA	Illumina Genome Analyzer II	SRP012040	GEO Series accession: GSE36025	0	66167	SRS307257		10090		Mus musculus	SRA051399	public	YES
SRR453135	2012-04-03 17:48:24	33085301	5028965752	152	3241		unspecified	ftp://ftp-private.ncbi.nlm.nih.gov/sra/sra-instant/reads/ByRun/sra/SRR/SRR453/SRR453135/SRR453135.sra	SRX135159	GSM900192: CSHL_RnaSeq_Thymus_adult-8wks	RNA-Seq	cDNA	OTHER	PAIRED	0	ILLUMINA	Illumina Genome Analyzer II	SRP012040	GEO Series accession: GSE36025	0	66167	SRS307257		10090		Mus musculus	SRA051399	public	YES
SRR453136	2012-04-03 17:13:20	33472366	5087799632	152	2989		unspecified	ftp://ftp-private.ncbi.nlm.nih.gov/sra/sra-instant/reads/ByRun/sra/SRR/SRR453/SRR453136/SRR453136.sra	SRX135159	GSM900192: CSHL_RnaSeq_Thymus_adult-8wks	RNA-Seq	cDNA	OTHER	PAIRED	0	ILLUMINA	Illumina Genome Analyzer II	SRP012040	GEO Series accession: GSE36025	0	66167	SRS307257		10090		Mus musculus	SRA051399	public	YES
SRR453137	2012-04-03 18:39:23	37355918	5678099536	152	3311		unspecified	ftp://ftp-private.ncbi.nlm.nih.gov/sra/sra-instant/reads/ByRun/sra/SRR/SRR453/SRR453137/SRR453137.sra	SRX135159	GSM900192: CSHL_RnaSeq_Thymus_adult-8wks	RNA-Seq	cDNA	OTHER	PAIRED	0	ILLUMINA	Illumina Genome Analyzer II	SRP012040	GEO Series accession: GSE36025	0	66167	SRS307257		10090		Mus musculus	SRA051399	public	YES
SRR453138	2012-04-03 17:32:19	31197022	4741947344	152	3073		unspecified	ftp://ftp-private.ncbi.nlm.nih.gov/sra/sra-instant/reads/ByRun/sra/SRR/SRR453/SRR453138/SRR453138.sra	SRX135159	GSM900192: CSHL_RnaSeq_Thymus_adult-8wks	RNA-Seq	cDNA	OTHER	PAIRED	0	ILLUMINA	Illumina Genome Analyzer II	SRP012040	GEO Series accession: GSE36025	0	66167	SRS307257		10090		Mus musculus	SRA051399	public	YES
SRR453139	2012-04-03 17:08:21	32992022	5014787344	152	2928		unspecified	ftp://ftp-private.ncbi.nlm.nih.gov/sra/sra-instant/reads/ByRun/sra/SRR/SRR453/SRR453139/SRR453139.sra	SRX135159	GSM900192: CSHL_RnaSeq_Thymus_adult-8wks	RNA-Seq	cDNA	OTHER	PAIRED	0	ILLUMINA	Illumina Genome Analyzer II	SRP012040	GEO Series accession: GSE36025	0	66167	SRS307257		10090		Mus musculus	SRA051399	public	YES
SRR453140	2012-04-03 18:20:21	37696007	5729793064	152	3297		unspecified	ftp://ftp-private.ncbi.nlm.nih.gov/sra/sra-instant/reads/ByRun/sra/SRR/SRR453/SRR453140/SRR453140.sra	SRX135160	GSM900193: CSHL_RnaSeq_Testis_adult-8wks	RNA-Seq	cDNA	OTHER	PAIRED	0	ILLUMINA	Illumina Genome Analyzer II	SRP012040	GEO Series accession: GSE36025	0	66167	SRS307258		10090		Mus musculus	SRA051399	public	YES
SRR453141	2012-04-03 18:29:19	35861103	5450887656	152	3300		unspecified	ftp://ftp-private.ncbi.nlm.nih.gov/sra/sra-instant/reads/ByRun/sra/SRR/SRR453/SRR453141/SRR453141.sra	SRX135160	GSM900193: CSHL_RnaSeq_Testis_adult-8wks	RNA-Seq	cDNA	OTHER	PAIRED	0	ILLUMINA	Illumina Genome Analyzer II	SRP012040	GEO Series accession: GSE36025	0	66167	SRS307258		10090		Mus musculus	SRA051399	public	YES
SRR453142	2012-04-03 20:58:35	41120376	6250297152	152	3916		unspecified	ftp://ftp-private.ncbi.nlm.nih.gov/sra/sra-instant/reads/ByRun/sra/SRR/SRR453/SRR453142/SRR453142.sra	SRX135160	GSM900193: CSHL_RnaSeq_Testis_adult-8wks	RNA-Seq	cDNA	OTHER	PAIRED	0	ILLUMINA	Illumina Genome Analyzer II	SRP012040	GEO Series accession: GSE36025	0	66167	SRS307258		10090		Mus musculus	SRA051399	public	YES
SRR453143	2012-04-03 18:47:21	36086152	5485095104	152	3404		unspecified	ftp://ftp-private.ncbi.nlm.nih.gov/sra/sra-instant/reads/ByRun/sra/SRR/SRR453/SRR453143/SRR453143.sra	SRX135160	GSM900193: CSHL_RnaSeq_Testis_adult-8wks	RNA-Seq	cDNA	OTHER	PAIRED	0	ILLUMINA	Illumina Genome Analyzer II	SRP012040	GEO Series accession: GSE36025	0	66167	SRS307258		10090		Mus musculus	SRA051399	public	YES
SRR453144	2012-04-03 20:17:38	38866777	5907750104	152	3806		unspecified	ftp://ftp-private.ncbi.nlm.nih.gov/sra/sra-instant/reads/ByRun/sra/SRR/SRR453/SRR453144/SRR453144.sra	SRX135161	GSM900194: CSHL_RnaSeq_Kidney_adult-8wks	RNA-Seq	cDNA	OTHER	PAIRED	0	ILLUMINA	Illumina Genome Analyzer II	SRP012040	GEO Series accession: GSE36025	0	66167	SRS307259		10090		Mus musculus	SRA051399	public	YES
SRR453145	2012-04-03 18:42:22	35536674	5401574448	152	3484		unspecified	ftp://ftp-private.ncbi.nlm.nih.gov/sra/sra-instant/reads/ByRun/sra/SRR/SRR453/SRR453145/SRR453145.sra	SRX135161	GSM900194: CSHL_RnaSeq_Kidney_adult-8wks	RNA-Seq	cDNA	OTHER	PAIRED	0	ILLUMINA	Illumina Genome Analyzer II	SRP012040	GEO Series accession: GSE36025	0	66167	SRS307259		10090		Mus musculus	SRA051399	public	YES
SRR453146	2012-04-03 14:03:11	18788286	2855819472	152	1534		unspecified	ftp://ftp-private.ncbi.nlm.nih.gov/sra/sra-instant/reads/ByRun/sra/SRR/SRR453/SRR453146/SRR453146.sra	SRX135161	GSM900194: CSHL_RnaSeq_Kidney_adult-8wks	RNA-Seq	cDNA	OTHER	PAIRED	0	ILLUMINA	Illumina Genome Analyzer II	SRP012040	GEO Series accession: GSE36025	0	66167	SRS307259		10090		Mus musculus	SRA051399	public	YES
SRR453147	2012-04-03 20:40:30	40542680	6162487360	152	3824		unspecified	ftp://ftp-private.ncbi.nlm.nih.gov/sra/sra-instant/reads/ByRun/sra/SRR/SRR453/SRR453147/SRR453147.sra	SRX135161	GSM900194: CSHL_RnaSeq_Kidney_adult-8wks	RNA-Seq	cDNA	OTHER	PAIRED	0	ILLUMINA	Illumina Genome Analyzer II	SRP012040	GEO Series accession: GSE36025	0	66167	SRS307259		10090		Mus musculus	SRA051399	public	YES
SRR453148	2012-04-03 18:54:20	37408520	5686095040	152	3593		unspecified	ftp://ftp-private.ncbi.nlm.nih.gov/sra/sra-instant/reads/ByRun/sra/SRR/SRR453/SRR453148/SRR453148.sra	SRX135161	GSM900194: CSHL_RnaSeq_Kidney_adult-8wks	RNA-Seq	cDNA	OTHER	PAIRED	0	ILLUMINA	Illumina Genome Analyzer II	SRP012040	GEO Series accession: GSE36025	0	66167	SRS307259		10090		Mus musculus	SRA051399	public	YES
SRR453149	2012-04-03 19:16:35	39936163	6070296776	152	3512		unspecified	ftp://ftp-private.ncbi.nlm.nih.gov/sra/sra-instant/reads/ByRun/sra/SRR/SRR453/SRR453149/SRR453149.sra	SRX135161	GSM900194: CSHL_RnaSeq_Kidney_adult-8wks	RNA-Seq	cDNA	OTHER	PAIRED	0	ILLUMINA	Illumina Genome Analyzer II	SRP012040	GEO Series accession: GSE36025	0	66167	SRS307259		10090		Mus musculus	SRA051399	public	YES
SRR453150	2012-04-03 16:45:20	30461949	4630216248	152	2851		unspecified	ftp://ftp-private.ncbi.nlm.nih.gov/sra/sra-instant/reads/ByRun/sra/SRR/SRR453/SRR453150/SRR453150.sra	SRX135162	GSM900195: CSHL_RnaSeq_Liver_adult-8wks	RNA-Seq	cDNA	OTHER	PAIRED	0	ILLUMINA	Illumina Genome Analyzer II	SRP012040	GEO Series accession: GSE36025	0	66167	SRS307260		10090		Mus musculus	SRA051399	public	YES
SRR453151	2012-04-03 13:56:10	17894796	2720008992	152	1373		unspecified	ftp://ftp-private.ncbi.nlm.nih.gov/sra/sra-instant/reads/ByRun/sra/SRR/SRR453/SRR453151/SRR453151.sra	SRX135162	GSM900195: CSHL_RnaSeq_Liver_adult-8wks	RNA-Seq	cDNA	OTHER	PAIRED	0	ILLUMINA	Illumina Genome Analyzer II	SRP012040	GEO Series accession: GSE36025	0	66167	SRS307260		10090		Mus musculus	SRA051399	public	YES
SRR453152	2012-04-03 17:23:23	31913472	4850847744	152	3046		unspecified	ftp://ftp-private.ncbi.nlm.nih.gov/sra/sra-instant/reads/ByRun/sra/SRR/SRR453/SRR453152/SRR453152.sra	SRX135162	GSM900195: CSHL_RnaSeq_Liver_adult-8wks	RNA-Seq	cDNA	OTHER	PAIRED	0	ILLUMINA	Illumina Genome Analyzer II	SRP012040	GEO Series accession: GSE36025	0	66167	SRS307260		10090		Mus musculus	SRA051399	public	YES
SRR453153	2012-04-03 16:11:13	27549415	4187511080	152	2547		unspecified	ftp://ftp-private.ncbi.nlm.nih.gov/sra/sra-instant/reads/ByRun/sra/SRR/SRR453/SRR453153/SRR453153.sra	SRX135162	GSM900195: CSHL_RnaSeq_Liver_adult-8wks	RNA-Seq	cDNA	OTHER	PAIRED	0	ILLUMINA	Illumina Genome Analyzer II	SRP012040	GEO Series accession: GSE36025	0	66167	SRS307260		10090		Mus musculus	SRA051399	public	YES
SRR453154	2012-04-03 14:59:17	24234923	3683708296	152	1939		unspecified	ftp://ftp-private.ncbi.nlm.nih.gov/sra/sra-instant/reads/ByRun/sra/SRR/SRR453/SRR453154/SRR453154.sra	SRX135162	GSM900195: CSHL_RnaSeq_Liver_adult-8wks	RNA-Seq	cDNA	OTHER	PAIRED	0	ILLUMINA	Illumina Genome Analyzer II	SRP012040	GEO Series accession: GSE36025	0	66167	SRS307260		10090		Mus musculus	SRA051399	public	YES
SRR453155	2012-04-03 17:03:26	30633616	4656309632	152	2920		unspecified	ftp://ftp-private.ncbi.nlm.nih.gov/sra/sra-instant/reads/ByRun/sra/SRR/SRR453/SRR453155/SRR453155.sra	SRX135162	GSM900195: CSHL_RnaSeq_Liver_adult-8wks	RNA-Seq	cDNA	OTHER	PAIRED	0	ILLUMINA	Illumina Genome Analyzer II	SRP012040	GEO Series accession: GSE36025	0	66167	SRS307260		10090		Mus musculus	SRA051399	public	YES
SRR453156	2012-04-03 17:47:15	35609119	5412586088	152	3165		unspecified	ftp://ftp-private.ncbi.nlm.nih.gov/sra/sra-instant/reads/ByRun/sra/SRR/SRR453/SRR453156/SRR453156.sra	SRX135163	GSM900196: CSHL_RnaSeq_Lung_adult-8wks	RNA-Seq	cDNA	OTHER	PAIRED	0	ILLUMINA	Illumina Genome Analyzer II	SRP012040	GEO Series accession: GSE36025	0	66167	SRS307261		10090		Mus musculus	SRA051399	public	YES
SRR453157	2012-04-03 18:01:19	34958253	5313654456	152	3302		unspecified	ftp://ftp-private.ncbi.nlm.nih.gov/sra/sra-instant/reads/ByRun/sra/SRR/SRR453/SRR453157/SRR453157.sra	SRX135163	GSM900196: CSHL_RnaSeq_Lung_adult-8wks	RNA-Seq	cDNA	OTHER	PAIRED	0	ILLUMINA	Illumina Genome Analyzer II	SRP012040	GEO Series accession: GSE36025	0	66167	SRS307261		10090		Mus musculus	SRA051399	public	YES
SRR453158	2012-04-03 16:39:19	31324910	4761386320	152	2683		unspecified	ftp://ftp-private.ncbi.nlm.nih.gov/sra/sra-instant/reads/ByRun/sra/SRR/SRR453/SRR453158/SRR453158.sra	SRX135163	GSM900196: CSHL_RnaSeq_Lung_adult-8wks	RNA-Seq	cDNA	OTHER	PAIRED	0	ILLUMINA	Illumina Genome Analyzer II	SRP012040	GEO Series accession: GSE36025	0	66167	SRS307261		10090		Mus musculus	SRA051399	public	YES
SRR453159	2012-04-03 16:58:22	31173877	4738429304	152	2871		unspecified	ftp://ftp-private.ncbi.nlm.nih.gov/sra/sra-instant/reads/ByRun/sra/SRR/SRR453/SRR453159/SRR453159.sra	SRX135163	GSM900196: CSHL_RnaSeq_Lung_adult-8wks	RNA-Seq	cDNA	OTHER	PAIRED	0	ILLUMINA	Illumina Genome Analyzer II	SRP012040	GEO Series accession: GSE36025	0	66167	SRS307261		10090		Mus musculus	SRA051399	public	YES
SRR453160	2012-04-03 16:21:25	29914055	4546936360	152	2542		unspecified	ftp://ftp-private.ncbi.nlm.nih.gov/sra/sra-instant/reads/ByRun/sra/SRR/SRR453/SRR453160/SRR453160.sra	SRX135164	GSM900197: CSHL_RnaSeq_Spleen_adult-8wks	RNA-Seq	cDNA	OTHER	PAIRED	0	ILLUMINA	Illumina Genome Analyzer II	SRP012040	GEO Series accession: GSE36025	0	66167	SRS307262		10090		Mus musculus	SRA051399	public	YES
SRR453161	2012-04-03 14:53:44	22731814	3455235728	152	2078		unspecified	ftp://ftp-private.ncbi.nlm.nih.gov/sra/sra-instant/reads/ByRun/sra/SRR/SRR453/SRR453161/SRR453161.sra	SRX135164	GSM900197: CSHL_RnaSeq_Spleen_adult-8wks	RNA-Seq	cDNA	OTHER	PAIRED	0	ILLUMINA	Illumina Genome Analyzer II	SRP012040	GEO Series accession: GSE36025	0	66167	SRS307262		10090		Mus musculus	SRA051399	public	YES
SRR453162	2012-04-03 14:16:11	21459054	3261776208	152	1848		unspecified	ftp://ftp-private.ncbi.nlm.nih.gov/sra/sra-instant/reads/ByRun/sra/SRR/SRR453/SRR453162/SRR453162.sra	SRX135164	GSM900197: CSHL_RnaSeq_Spleen_adult-8wks	RNA-Seq	cDNA	OTHER	PAIRED	0	ILLUMINA	Illumina Genome Analyzer II	SRP012040	GEO Series accession: GSE36025	0	66167	SRS307262		10090		Mus musculus	SRA051399	public	YES
SRR453163	2012-04-03 15:57:19	29306735	4454623720	152	2433		unspecified	ftp://ftp-private.ncbi.nlm.nih.gov/sra/sra-instant/reads/ByRun/sra/SRR/SRR453/SRR453163/SRR453163.sra	SRX135164	GSM900197: CSHL_RnaSeq_Spleen_adult-8wks	RNA-Seq	cDNA	OTHER	PAIRED	0	ILLUMINA	Illumina Genome Analyzer II	SRP012040	GEO Series accession: GSE36025	0	66167	SRS307262		10090		Mus musculus	SRA051399	public	YES
SRR453164	2012-04-03 15:13:16	23661606	3596564112	152	2188		unspecified	ftp://ftp-private.ncbi.nlm.nih.gov/sra/sra-instant/reads/ByRun/sra/SRR/SRR453/SRR453164/SRR453164.sra	SRX135164	GSM900197: CSHL_RnaSeq_Spleen_adult-8wks	RNA-Seq	cDNA	OTHER	PAIRED	0	ILLUMINA	Illumina Genome Analyzer II	SRP012040	GEO Series accession: GSE36025	0	66167	SRS307262		10090		Mus musculus	SRA051399	public	YES
SRR453165	2012-04-03 15:23:13	25521032	3879196864	152	2197		unspecified	ftp://ftp-private.ncbi.nlm.nih.gov/sra/sra-instant/reads/ByRun/sra/SRR/SRR453/SRR453165/SRR453165.sra	SRX135164	GSM900197: CSHL_RnaSeq_Spleen_adult-8wks	RNA-Seq	cDNA	OTHER	PAIRED	0	ILLUMINA	Illumina Genome Analyzer II	SRP012040	GEO Series accession: GSE36025	0	66167	SRS307262		10090		Mus musculus	SRA051399	public	YES
SRR453166	2012-04-03 15:52:12	27991390	4254691280	152	2354		unspecified	ftp://ftp-private.ncbi.nlm.nih.gov/sra/sra-instant/reads/ByRun/sra/SRR/SRR453/SRR453166/SRR453166.sra	SRX135165	GSM900198: CSHL_RnaSeq_Colon_adult-8wks	RNA-Seq	cDNA	OTHER	PAIRED	0	ILLUMINA	Illumina Genome Analyzer II	SRP012040	GEO Series accession: GSE36025	0	66167	SRS307263		10090		Mus musculus	SRA051399	public	YES
SRR453167	2012-04-03 15:30:17	24235072	3683730944	152	2252		unspecified	ftp://ftp-private.ncbi.nlm.nih.gov/sra/sra-instant/reads/ByRun/sra/SRR/SRR453/SRR453167/SRR453167.sra	SRX135165	GSM900198: CSHL_RnaSeq_Colon_adult-8wks	RNA-Seq	cDNA	OTHER	PAIRED	0	ILLUMINA	Illumina Genome Analyzer II	SRP012040	GEO Series accession: GSE36025	0	66167	SRS307263		10090		Mus musculus	SRA051399	public	YES
SRR453168	2012-04-03 13:49:13	12613067	1917186184	152	1019		unspecified	ftp://ftp-private.ncbi.nlm.nih.gov/sra/sra-instant/reads/ByRun/sra/SRR/SRR453/SRR453168/SRR453168.sra	SRX135165	GSM900198: CSHL_RnaSeq_Colon_adult-8wks	RNA-Seq	cDNA	OTHER	PAIRED	0	ILLUMINA	Illumina Genome Analyzer II	SRP012040	GEO Series accession: GSE36025	0	66167	SRS307263		10090		Mus musculus	SRA051399	public	YES
SRR453169	2012-04-03 14:51:54	22147682	3366447664	152	2035		unspecified	ftp://ftp-private.ncbi.nlm.nih.gov/sra/sra-instant/reads/ByRun/sra/SRR/SRR453/SRR453169/SRR453169.sra	SRX135165	GSM900198: CSHL_RnaSeq_Colon_adult-8wks	RNA-Seq	cDNA	OTHER	PAIRED	0	ILLUMINA	Illumina Genome Analyzer II	SRP012040	GEO Series accession: GSE36025	0	66167	SRS307263		10090		Mus musculus	SRA051399	public	YES
SRR453170	2012-04-03 14:29:13	22341444	3395899488	152	1880		unspecified	ftp://ftp-private.ncbi.nlm.nih.gov/sra/sra-instant/reads/ByRun/sra/SRR/SRR453/SRR453170/SRR453170.sra	SRX135165	GSM900198: CSHL_RnaSeq_Colon_adult-8wks	RNA-Seq	cDNA	OTHER	PAIRED	0	ILLUMINA	Illumina Genome Analyzer II	SRP012040	GEO Series accession: GSE36025	0	66167	SRS307263		10090		Mus musculus	SRA051399	public	YES
SRR453171	2012-04-03 14:34:45	21677098	3294918896	152	1914		unspecified	ftp://ftp-private.ncbi.nlm.nih.gov/sra/sra-instant/reads/ByRun/sra/SRR/SRR453/SRR453171/SRR453171.sra	SRX135165	GSM900198: CSHL_RnaSeq_Colon_adult-8wks	RNA-Seq	cDNA	OTHER	PAIRED	0	ILLUMINA	Illumina Genome Analyzer II	SRP012040	GEO Series accession: GSE36025	0	66167	SRS307263		10090		Mus musculus	SRA051399	public	YES
SRR453172	2012-04-03 19:22:35	39038956	5933921312	152	3814		unspecified	ftp://ftp-private.ncbi.nlm.nih.gov/sra/sra-instant/reads/ByRun/sra/SRR/SRR453/SRR453172/SRR453172.sra	SRX135166	GSM900199: CSHL_RnaSeq_Heart_adult-8wks	RNA-Seq	cDNA	OTHER	PAIRED	0	ILLUMINA	Illumina Genome Analyzer II	SRP012040	GEO Series accession: GSE36025	0	66167	SRS307264		10090		Mus musculus	SRA051399	public	YES
SRR453173	2012-04-03 18:33:20	35570309	5406686968	152	3646		unspecified	ftp://ftp-private.ncbi.nlm.nih.gov/sra/sra-instant/reads/ByRun/sra/SRR/SRR453/SRR453173/SRR453173.sra	SRX135166	GSM900199: CSHL_RnaSeq_Heart_adult-8wks	RNA-Seq	cDNA	OTHER	PAIRED	0	ILLUMINA	Illumina Genome Analyzer II	SRP012040	GEO Series accession: GSE36025	0	66167	SRS307264		10090		Mus musculus	SRA051399	public	YES
SRR453174	2012-04-03 20:24:43	41443334	6299386768	152	3777		unspecified	ftp://ftp-private.ncbi.nlm.nih.gov/sra/sra-instant/reads/ByRun/sra/SRR/SRR453/SRR453174/SRR453174.sra	SRX135166	GSM900199: CSHL_RnaSeq_Heart_adult-8wks	RNA-Seq	cDNA	OTHER	PAIRED	0	ILLUMINA	Illumina Genome Analyzer II	SRP012040	GEO Series accession: GSE36025	0	66167	SRS307264		10090		Mus musculus	SRA051399	public	YES
SRR453175	2012-04-03 19:45:30	39528591	6008345832	152	3861		unspecified	ftp://ftp-private.ncbi.nlm.nih.gov/sra/sra-instant/reads/ByRun/sra/SRR/SRR453/SRR453175/SRR453175.sra	SRX135166	GSM900199: CSHL_RnaSeq_Heart_adult-8wks	RNA-Seq	cDNA	OTHER	PAIRED	0	ILLUMINA	Illumina Genome Analyzer II	SRP012040	GEO Series accession: GSE36025	0	66167	SRS307264		10090		Mus musculus	SRA051399	public	YES
SRR037877	2010-05-26 15:30:16	15230510	1157518760	76	1167		unspecified	ftp://ftp-private.ncbi.nlm.nih.gov/sra/sra-instant/reads/ByRun/sra/SRR/SRR037/SRR037877/SRR037877.sra	SRX017737	Primary bone marrow-derived macrophages (BMDM) from Fvb mice UT	RNA-Seq	size fractionation	TRANSCRIPTOMIC	SINGLE	0	ILLUMINA	Illumina Genome Analyzer II	SRP002116	GEO Series accession: GSE20370	20485488	125471	SRS024952		10090	Mus musculus	Mus musculus	SRA012226	public	YES
SRR037878	2010-05-26 15:30:16	15045633	1143468108	76	1153		unspecified	ftp://ftp-private.ncbi.nlm.nih.gov/sra/sra-instant/reads/ByRun/sra/SRR/SRR037/SRR037878/SRR037878.sra	SRX017737	Primary bone marrow-derived macrophages (BMDM) from Fvb mice UT	RNA-Seq	size fractionation	TRANSCRIPTOMIC	SINGLE	0	ILLUMINA	Illumina Genome Analyzer II	SRP002116	GEO Series accession: GSE20370	20485488	125471	SRS024952		10090	Mus musculus	Mus musculus	SRA012226	public	YES
SRR038971	2010-05-26 15:30:16	16413820	902760100	55	931			ftp://ftp-private.ncbi.nlm.nih.gov/sra/sra-instant/reads/ByRun/sra/SRR/SRR038/SRR038971/SRR038971.sra	SRX017737	Primary bone marrow-derived macrophages (BMDM) from Fvb mice UT	RNA-Seq	size fractionation	TRANSCRIPTOMIC	SINGLE	0	ILLUMINA	Illumina Genome Analyzer II	SRP002116	GEO Series accession: GSE20370	20485488	125471	SRS024952		10090	Mus musculus	Mus musculus	SRA012226	public	YES
SRR038972	2010-05-26 15:30:16	15953478	877441290	55	905			ftp://ftp-private.ncbi.nlm.nih.gov/sra/sra-instant/reads/ByRun/sra/SRR/SRR038/SRR038972/SRR038972.sra	SRX017737	Primary bone marrow-derived macrophages (BMDM) from Fvb mice UT	RNA-Seq	size fractionation	TRANSCRIPTOMIC	SINGLE	0	ILLUMINA	Illumina Genome Analyzer II	SRP002116	GEO Series accession: GSE20370	20485488	125471	SRS024952		10090	Mus musculus	Mus musculus	SRA012226	public	YES
ERR031629	2011-04-06 19:27:30	16303478	652139120	40	757			ftp://ftp-private.ncbi.nlm.nih.gov/sra/sra-instant/reads/ByRun/sra/ERR/ERR031/ERR031629/ERR031629.sra	ERX011831	J1 ES 1 RNA-Seq	RNA-Seq	RANDOM	TRANSCRIPTOMIC	SINGLE	0	ILLUMINA	Illumina Genome Analyzer IIx	ERP000570	mc_hmC_development	21460836	0	ERS025975		10090	Mus musculus	Mouse	ERA023807	public	YES
ERR031646	2011-04-06 19:27:32	17454693	698187720	40	805			ftp://ftp-private.ncbi.nlm.nih.gov/sra/sra-instant/reads/ByRun/sra/ERR/ERR031/ERR031646/ERR031646.sra	ERX011848	ES Tet1-Tet2 KD RNA-Seq	RNA-Seq	RANDOM	TRANSCRIPTOMIC	SINGLE	0	ILLUMINA	Illumina Genome Analyzer IIx	ERP000570	mc_hmC_development	21460836	0	ERS025983		10090	Mus musculus	Mouse	ERA023807	public	YES
ERR031649	2011-04-06 19:27:32	19708914	788356560	40	607			ftp://ftp-private.ncbi.nlm.nih.gov/sra/sra-instant/reads/ByRun/sra/ERR/ERR031/ERR031649/ERR031649.sra	ERX011851	ES Tet1-Tet2 KD 2 RNA-Seq	RNA-Seq	RANDOM	TRANSCRIPTOMIC	SINGLE	0	ILLUMINA	Illumina Genome Analyzer IIx	ERP000570	mc_hmC_development	21460836	0	ERS025984		10090	Mus musculus	Mouse	ERA023807	public	YES
ERR031650	2011-04-06 19:27:32	19465826	778633040	40	593			ftp://ftp-private.ncbi.nlm.nih.gov/sra/sra-instant/reads/ByRun/sra/ERR/ERR031/ERR031650/ERR031650.sra	ERX011852	ES Tet1-Tet2 KD 3 RNA-Seq	RNA-Seq	RANDOM	TRANSCRIPTOMIC	SINGLE	0	ILLUMINA	Illumina Genome Analyzer IIx	ERP000570	mc_hmC_development	21460836	0	ERS025985		10090	Mus musculus	Mouse	ERA023807	public	YES
ERR031655	2011-04-06 19:27:32	17769431	710777240	40	825			ftp://ftp-private.ncbi.nlm.nih.gov/sra/sra-instant/reads/ByRun/sra/ERR/ERR031/ERR031655/ERR031655.sra	ERX011857	Mock KD ES 1 RNA-Seq	RNA-Seq	RANDOM	TRANSCRIPTOMIC	SINGLE	0	ILLUMINA	Illumina Genome Analyzer IIx	ERP000570	mc_hmC_development	21460836	0	ERS025988		10090	Mus musculus	Mouse	ERA023807	public	YES
ERR031657	2011-04-06 19:27:32	22175911	887036440	40	680			ftp://ftp-private.ncbi.nlm.nih.gov/sra/sra-instant/reads/ByRun/sra/ERR/ERR031/ERR031657/ERR031657.sra	ERX011859	Mock KD ES 3 RNA-Seq	RNA-Seq	RANDOM	TRANSCRIPTOMIC	SINGLE	0	ILLUMINA	Illumina Genome Analyzer IIx	ERP000570	mc_hmC_development	21460836	0	ERS025988		10090	Mus musculus	Mouse	ERA023807	public	YES
ERR031656	2011-04-06 19:27:32	20831956	833278240	40	674			ftp://ftp-private.ncbi.nlm.nih.gov/sra/sra-instant/reads/ByRun/sra/ERR/ERR031/ERR031656/ERR031656.sra	ERX011858	Mock KD ES 2 RNA-Seq	RNA-Seq	RANDOM	TRANSCRIPTOMIC	SINGLE	0	ILLUMINA	Illumina Genome Analyzer IIx	ERP000570	mc_hmC_development	21460836	0	ERS025989		10090	Mus musculus	Mouse	ERA023807	public	YES
ERR034795	2011-06-10 19:20:14	19706072	788242880	40	622		BI-UK	ftp://ftp-private.ncbi.nlm.nih.gov/sra/sra-instant/reads/ByRun/sra/ERR/ERR034/ERR034795/ERR034795.sra	ERX013135	RNA-Seq d10-SR experiment	RNA-Seq	RANDOM	TRANSCRIPTOMIC	SINGLE	0	ILLUMINA	Illumina Genome Analyzer IIx	ERP000689	study_0:0	0	0	ERS033856		10090		house mouse	ERA031548	public	YES
ERR034796	2011-06-10 19:20:14	24421407	1953712560	80	1321		BI-UK	ftp://ftp-private.ncbi.nlm.nih.gov/sra/sra-instant/reads/ByRun/sra/ERR/ERR034/ERR034796/ERR034796.sra	ERX013136	RNA-Seq d10-PE experiment	RNA-Seq	RANDOM	TRANSCRIPTOMIC	PAIRED	150	ILLUMINA	Illumina Genome Analyzer IIx	ERP000689	study_0:0	0	0	ERS033857		10090		house mouse	ERA031548	public	YES
ERR034797	2011-06-10 19:20:14	19398792	775951680	40	657		BI-UK	ftp://ftp-private.ncbi.nlm.nih.gov/sra/sra-instant/reads/ByRun/sra/ERR/ERR034/ERR034797/ERR034797.sra	ERX013137	RNA-Seq FG-GV experiment	RNA-Seq	RANDOM	TRANSCRIPTOMIC	SINGLE	0	ILLUMINA	Illumina Genome Analyzer IIx	ERP000689	study_0:0	0	0	ERS033858		10090		house mouse	ERA031548	public	YES
SRR059521	2010-07-09 16:39:32	3471911	124988796	36	132		unspecified	ftp://ftp-private.ncbi.nlm.nih.gov/sra/sra-instant/reads/ByRun/sra/SRR/SRR059/SRR059521/SRR059521.sra	SRX023086	GSM563763: E15_CastEiJ_RNASeq_techrep1	RNA-Seq	cDNA	TRANSCRIPTOMIC	SINGLE	0	ILLUMINA	Illumina Genome Analyzer II	SRP002811	GEO Series accession: GSE22131	20616232	127583	SRS084841		10090	Mus musculus	Mus musculus	SRA020843	public	YES
SRR059522	2010-07-09 16:39:32	5034861	181254996	36	192		unspecified	ftp://ftp-private.ncbi.nlm.nih.gov/sra/sra-instant/reads/ByRun/sra/SRR/SRR059/SRR059522/SRR059522.sra	SRX023086	GSM563763: E15_CastEiJ_RNASeq_techrep1	RNA-Seq	cDNA	TRANSCRIPTOMIC	SINGLE	0	ILLUMINA	Illumina Genome Analyzer II	SRP002811	GEO Series accession: GSE22131	20616232	127583	SRS084841		10090	Mus musculus	Mus musculus	SRA020843	public	YES
SRR059523	2010-07-09 16:39:32	5398284	194338224	36	205		unspecified	ftp://ftp-private.ncbi.nlm.nih.gov/sra/sra-instant/reads/ByRun/sra/SRR/SRR059/SRR059523/SRR059523.sra	SRX023086	GSM563763: E15_CastEiJ_RNASeq_techrep1	RNA-Seq	cDNA	TRANSCRIPTOMIC	SINGLE	0	ILLUMINA	Illumina Genome Analyzer II	SRP002811	GEO Series accession: GSE22131	20616232	127583	SRS084841		10090	Mus musculus	Mus musculus	SRA020843	public	YES
SRR059524	2010-07-09 16:39:32	5706534	205435224	36	217		unspecified	ftp://ftp-private.ncbi.nlm.nih.gov/sra/sra-instant/reads/ByRun/sra/SRR/SRR059/SRR059524/SRR059524.sra	SRX023086	GSM563763: E15_CastEiJ_RNASeq_techrep1	RNA-Seq	cDNA	TRANSCRIPTOMIC	SINGLE	0	ILLUMINA	Illumina Genome Analyzer II	SRP002811	GEO Series accession: GSE22131	20616232	127583	SRS084841		10090	Mus musculus	Mus musculus	SRA020843	public	YES
SRR059525	2010-07-09 16:39:32	6123874	220459464	36	233		unspecified	ftp://ftp-private.ncbi.nlm.nih.gov/sra/sra-instant/reads/ByRun/sra/SRR/SRR059/SRR059525/SRR059525.sra	SRX023086	GSM563763: E15_CastEiJ_RNASeq_techrep1	RNA-Seq	cDNA	TRANSCRIPTOMIC	SINGLE	0	ILLUMINA	Illumina Genome Analyzer II	SRP002811	GEO Series accession: GSE22131	20616232	127583	SRS084841		10090	Mus musculus	Mus musculus	SRA020843	public	YES
SRR059526	2010-07-09 16:39:32	6165656	221963616	36	235		unspecified	ftp://ftp-private.ncbi.nlm.nih.gov/sra/sra-instant/reads/ByRun/sra/SRR/SRR059/SRR059526/SRR059526.sra	SRX023086	GSM563763: E15_CastEiJ_RNASeq_techrep1	RNA-Seq	cDNA	TRANSCRIPTOMIC	SINGLE	0	ILLUMINA	Illumina Genome Analyzer II	SRP002811	GEO Series accession: GSE22131	20616232	127583	SRS084841		10090	Mus musculus	Mus musculus	SRA020843	public	YES
SRR059527	2010-07-09 16:39:32	6361451	229012236	36	242		unspecified	ftp://ftp-private.ncbi.nlm.nih.gov/sra/sra-instant/reads/ByRun/sra/SRR/SRR059/SRR059527/SRR059527.sra	SRX023086	GSM563763: E15_CastEiJ_RNASeq_techrep1	RNA-Seq	cDNA	TRANSCRIPTOMIC	SINGLE	0	ILLUMINA	Illumina Genome Analyzer II	SRP002811	GEO Series accession: GSE22131	20616232	127583	SRS084841		10090	Mus musculus	Mus musculus	SRA020843	public	YES
SRR059528	2010-07-09 16:39:32	6556502	236034072	36	250		unspecified	ftp://ftp-private.ncbi.nlm.nih.gov/sra/sra-instant/reads/ByRun/sra/SRR/SRR059/SRR059528/SRR059528.sra	SRX023086	GSM563763: E15_CastEiJ_RNASeq_techrep1	RNA-Seq	cDNA	TRANSCRIPTOMIC	SINGLE	0	ILLUMINA	Illumina Genome Analyzer II	SRP002811	GEO Series accession: GSE22131	20616232	127583	SRS084841		10090	Mus musculus	Mus musculus	SRA020843	public	YES
SRR059529	2010-07-09 16:39:32	5507866	198283176	36	210		unspecified	ftp://ftp-private.ncbi.nlm.nih.gov/sra/sra-instant/reads/ByRun/sra/SRR/SRR059/SRR059529/SRR059529.sra	SRX023087	GSM563764: E15_C57BL/6J_RNASeq_techrep1	RNA-Seq	cDNA	TRANSCRIPTOMIC	SINGLE	0	ILLUMINA	Illumina Genome Analyzer II	SRP002811	GEO Series accession: GSE22131	20616232	127583	SRS084842		10090	Mus musculus	Mus musculus	SRA020843	public	YES
SRR059530	2010-07-09 16:39:32	5553616	199930176	36	211		unspecified	ftp://ftp-private.ncbi.nlm.nih.gov/sra/sra-instant/reads/ByRun/sra/SRR/SRR059/SRR059530/SRR059530.sra	SRX023087	GSM563764: E15_C57BL/6J_RNASeq_techrep1	RNA-Seq	cDNA	TRANSCRIPTOMIC	SINGLE	0	ILLUMINA	Illumina Genome Analyzer II	SRP002811	GEO Series accession: GSE22131	20616232	127583	SRS084842		10090	Mus musculus	Mus musculus	SRA020843	public	YES
SRR059531	2010-07-09 16:39:32	5602679	201696444	36	213		unspecified	ftp://ftp-private.ncbi.nlm.nih.gov/sra/sra-instant/reads/ByRun/sra/SRR/SRR059/SRR059531/SRR059531.sra	SRX023087	GSM563764: E15_C57BL/6J_RNASeq_techrep1	RNA-Seq	cDNA	TRANSCRIPTOMIC	SINGLE	0	ILLUMINA	Illumina Genome Analyzer II	SRP002811	GEO Series accession: GSE22131	20616232	127583	SRS084842		10090	Mus musculus	Mus musculus	SRA020843	public	YES
SRR059532	2010-07-09 16:39:32	6554233	235952388	36	250		unspecified	ftp://ftp-private.ncbi.nlm.nih.gov/sra/sra-instant/reads/ByRun/sra/SRR/SRR059/SRR059532/SRR059532.sra	SRX023087	GSM563764: E15_C57BL/6J_RNASeq_techrep1	RNA-Seq	cDNA	TRANSCRIPTOMIC	SINGLE	0	ILLUMINA	Illumina Genome Analyzer II	SRP002811	GEO Series accession: GSE22131	20616232	127583	SRS084842		10090	Mus musculus	Mus musculus	SRA020843	public	YES
SRR059533	2010-07-09 16:39:32	6536313	235307268	36	249		unspecified	ftp://ftp-private.ncbi.nlm.nih.gov/sra/sra-instant/reads/ByRun/sra/SRR/SRR059/SRR059533/SRR059533.sra	SRX023087	GSM563764: E15_C57BL/6J_RNASeq_techrep1	RNA-Seq	cDNA	TRANSCRIPTOMIC	SINGLE	0	ILLUMINA	Illumina Genome Analyzer II	SRP002811	GEO Series accession: GSE22131	20616232	127583	SRS084842		10090	Mus musculus	Mus musculus	SRA020843	public	YES
SRR059534	2010-07-09 16:39:32	6331046	227917656	36	241		unspecified	ftp://ftp-private.ncbi.nlm.nih.gov/sra/sra-instant/reads/ByRun/sra/SRR/SRR059/SRR059534/SRR059534.sra	SRX023087	GSM563764: E15_C57BL/6J_RNASeq_techrep1	RNA-Seq	cDNA	TRANSCRIPTOMIC	SINGLE	0	ILLUMINA	Illumina Genome Analyzer II	SRP002811	GEO Series accession: GSE22131	20616232	127583	SRS084842		10090	Mus musculus	Mus musculus	SRA020843	public	YES
SRR059535	2010-07-09 16:39:32	6572189	236598804	36	250		unspecified	ftp://ftp-private.ncbi.nlm.nih.gov/sra/sra-instant/reads/ByRun/sra/SRR/SRR059/SRR059535/SRR059535.sra	SRX023087	GSM563764: E15_C57BL/6J_RNASeq_techrep1	RNA-Seq	cDNA	TRANSCRIPTOMIC	SINGLE	0	ILLUMINA	Illumina Genome Analyzer II	SRP002811	GEO Series accession: GSE22131	20616232	127583	SRS084842		10090	Mus musculus	Mus musculus	SRA020843	public	YES
SRR059536	2010-07-09 16:39:32	6122343	220404348	36	233		unspecified	ftp://ftp-private.ncbi.nlm.nih.gov/sra/sra-instant/reads/ByRun/sra/SRR/SRR059/SRR059536/SRR059536.sra	SRX023087	GSM563764: E15_C57BL/6J_RNASeq_techrep1	RNA-Seq	cDNA	TRANSCRIPTOMIC	SINGLE	0	ILLUMINA	Illumina Genome Analyzer II	SRP002811	GEO Series accession: GSE22131	20616232	127583	SRS084842		10090	Mus musculus	Mus musculus	SRA020843	public	YES
SRR059537	2010-07-09 16:39:32	7079355	254856780	36	270		unspecified	ftp://ftp-private.ncbi.nlm.nih.gov/sra/sra-instant/reads/ByRun/sra/SRR/SRR059/SRR059537/SRR059537.sra	SRX023088	GSM563765: E15_CastEiJ_RNASeq_techrep2	RNA-Seq	cDNA	TRANSCRIPTOMIC	SINGLE	0	ILLUMINA	Illumina Genome Analyzer II	SRP002811	GEO Series accession: GSE22131	20616232	127583	SRS084843		10090	Mus musculus	Mus musculus	SRA020843	public	YES
SRR059538	2010-07-09 16:39:32	7304446	262960056	36	278		unspecified	ftp://ftp-private.ncbi.nlm.nih.gov/sra/sra-instant/reads/ByRun/sra/SRR/SRR059/SRR059538/SRR059538.sra	SRX023088	GSM563765: E15_CastEiJ_RNASeq_techrep2	RNA-Seq	cDNA	TRANSCRIPTOMIC	SINGLE	0	ILLUMINA	Illumina Genome Analyzer II	SRP002811	GEO Series accession: GSE22131	20616232	127583	SRS084843		10090	Mus musculus	Mus musculus	SRA020843	public	YES
SRR059539	2010-07-09 16:39:32	6582767	236979612	36	251		unspecified	ftp://ftp-private.ncbi.nlm.nih.gov/sra/sra-instant/reads/ByRun/sra/SRR/SRR059/SRR059539/SRR059539.sra	SRX023088	GSM563765: E15_CastEiJ_RNASeq_techrep2	RNA-Seq	cDNA	TRANSCRIPTOMIC	SINGLE	0	ILLUMINA	Illumina Genome Analyzer II	SRP002811	GEO Series accession: GSE22131	20616232	127583	SRS084843		10090	Mus musculus	Mus musculus	SRA020843	public	YES
SRR059540	2010-07-09 16:39:32	7684657	276647652	36	293		unspecified	ftp://ftp-private.ncbi.nlm.nih.gov/sra/sra-instant/reads/ByRun/sra/SRR/SRR059/SRR059540/SRR059540.sra	SRX023089	GSM563766: E15_C57BL/6J_RNASeq_techrep2	RNA-Seq	cDNA	TRANSCRIPTOMIC	SINGLE	0	ILLUMINA	Illumina Genome Analyzer II	SRP002811	GEO Series accession: GSE22131	20616232	127583	SRS084844		10090	Mus musculus	Mus musculus	SRA020843	public	YES
SRR059541	2010-07-09 16:39:32	7746277	278865972	36	295		unspecified	ftp://ftp-private.ncbi.nlm.nih.gov/sra/sra-instant/reads/ByRun/sra/SRR/SRR059/SRR059541/SRR059541.sra	SRX023089	GSM563766: E15_C57BL/6J_RNASeq_techrep2	RNA-Seq	cDNA	TRANSCRIPTOMIC	SINGLE	0	ILLUMINA	Illumina Genome Analyzer II	SRP002811	GEO Series accession: GSE22131	20616232	127583	SRS084844		10090	Mus musculus	Mus musculus	SRA020843	public	YES
SRR059542	2010-07-09 16:39:32	7617153	274217508	36	290		unspecified	ftp://ftp-private.ncbi.nlm.nih.gov/sra/sra-instant/reads/ByRun/sra/SRR/SRR059/SRR059542/SRR059542.sra	SRX023089	GSM563766: E15_C57BL/6J_RNASeq_techrep2	RNA-Seq	cDNA	TRANSCRIPTOMIC	SINGLE	0	ILLUMINA	Illumina Genome Analyzer II	SRP002811	GEO Series accession: GSE22131	20616232	127583	SRS084844		10090	Mus musculus	Mus musculus	SRA020843	public	YES
SRR059543	2010-07-09 16:39:32	7293526	233392832	32	250		unspecified	ftp://ftp-private.ncbi.nlm.nih.gov/sra/sra-instant/reads/ByRun/sra/SRR/SRR059/SRR059543/SRR059543.sra	SRX023090	GSM563767: POA_CastEiJ_RNASeq_techrep1	RNA-Seq	cDNA	TRANSCRIPTOMIC	SINGLE	0	ILLUMINA	Illumina Genome Analyzer II	SRP002811	GEO Series accession: GSE22131	20616232	127583	SRS084845		10090	Mus musculus	Mus musculus	SRA020843	public	YES
SRR059544	2010-07-09 16:39:32	5071957	162302624	32	174		unspecified	ftp://ftp-private.ncbi.nlm.nih.gov/sra/sra-instant/reads/ByRun/sra/SRR/SRR059/SRR059544/SRR059544.sra	SRX023090	GSM563767: POA_CastEiJ_RNASeq_techrep1	RNA-Seq	cDNA	TRANSCRIPTOMIC	SINGLE	0	ILLUMINA	Illumina Genome Analyzer II	SRP002811	GEO Series accession: GSE22131	20616232	127583	SRS084845		10090	Mus musculus	Mus musculus	SRA020843	public	YES
SRR059545	2010-07-09 16:39:32	7529848	240955136	32	258		unspecified	ftp://ftp-private.ncbi.nlm.nih.gov/sra/sra-instant/reads/ByRun/sra/SRR/SRR059/SRR059545/SRR059545.sra	SRX023090	GSM563767: POA_CastEiJ_RNASeq_techrep1	RNA-Seq	cDNA	TRANSCRIPTOMIC	SINGLE	0	ILLUMINA	Illumina Genome Analyzer II	SRP002811	GEO Series accession: GSE22131	20616232	127583	SRS084845		10090	Mus musculus	Mus musculus	SRA020843	public	YES
SRR059546	2010-07-09 16:39:32	7326898	234460736	32	251		unspecified	ftp://ftp-private.ncbi.nlm.nih.gov/sra/sra-instant/reads/ByRun/sra/SRR/SRR059/SRR059546/SRR059546.sra	SRX023090	GSM563767: POA_CastEiJ_RNASeq_techrep1	RNA-Seq	cDNA	TRANSCRIPTOMIC	SINGLE	0	ILLUMINA	Illumina Genome Analyzer II	SRP002811	GEO Series accession: GSE22131	20616232	127583	SRS084845		10090	Mus musculus	Mus musculus	SRA020843	public	YES
SRR059547	2010-07-09 16:39:32	7058843	225882976	32	242		unspecified	ftp://ftp-private.ncbi.nlm.nih.gov/sra/sra-instant/reads/ByRun/sra/SRR/SRR059/SRR059547/SRR059547.sra	SRX023090	GSM563767: POA_CastEiJ_RNASeq_techrep1	RNA-Seq	cDNA	TRANSCRIPTOMIC	SINGLE	0	ILLUMINA	Illumina Genome Analyzer II	SRP002811	GEO Series accession: GSE22131	20616232	127583	SRS084845		10090	Mus musculus	Mus musculus	SRA020843	public	YES
SRR059548	2010-07-09 16:39:32	4844439	155022048	32	166		unspecified	ftp://ftp-private.ncbi.nlm.nih.gov/sra/sra-instant/reads/ByRun/sra/SRR/SRR059/SRR059548/SRR059548.sra	SRX023091	GSM563768: POA_C57BL/6J_RNASeq_techrep1	RNA-Seq	cDNA	TRANSCRIPTOMIC	SINGLE	0	ILLUMINA	Illumina Genome Analyzer II	SRP002811	GEO Series accession: GSE22131	20616232	127583	SRS084846		10090	Mus musculus	Mus musculus	SRA020843	public	YES
SRR059549	2010-07-09 16:39:32	8098795	259161440	32	278		unspecified	ftp://ftp-private.ncbi.nlm.nih.gov/sra/sra-instant/reads/ByRun/sra/SRR/SRR059/SRR059549/SRR059549.sra	SRX023091	GSM563768: POA_C57BL/6J_RNASeq_techrep1	RNA-Seq	cDNA	TRANSCRIPTOMIC	SINGLE	0	ILLUMINA	Illumina Genome Analyzer II	SRP002811	GEO Series accession: GSE22131	20616232	127583	SRS084846		10090	Mus musculus	Mus musculus	SRA020843	public	YES
SRR059550	2010-07-09 16:39:32	8199904	262396928	32	281		unspecified	ftp://ftp-private.ncbi.nlm.nih.gov/sra/sra-instant/reads/ByRun/sra/SRR/SRR059/SRR059550/SRR059550.sra	SRX023091	GSM563768: POA_C57BL/6J_RNASeq_techrep1	RNA-Seq	cDNA	TRANSCRIPTOMIC	SINGLE	0	ILLUMINA	Illumina Genome Analyzer II	SRP002811	GEO Series accession: GSE22131	20616232	127583	SRS084846		10090	Mus musculus	Mus musculus	SRA020843	public	YES
SRR059551	2010-07-09 16:39:32	7982811	255449952	32	274		unspecified	ftp://ftp-private.ncbi.nlm.nih.gov/sra/sra-instant/reads/ByRun/sra/SRR/SRR059/SRR059551/SRR059551.sra	SRX023091	GSM563768: POA_C57BL/6J_RNASeq_techrep1	RNA-Seq	cDNA	TRANSCRIPTOMIC	SINGLE	0	ILLUMINA	Illumina Genome Analyzer II	SRP002811	GEO Series accession: GSE22131	20616232	127583	SRS084846		10090	Mus musculus	Mus musculus	SRA020843	public	YES
SRR059552	2010-07-09 16:39:32	5376527	172048864	32	184		unspecified	ftp://ftp-private.ncbi.nlm.nih.gov/sra/sra-instant/reads/ByRun/sra/SRR/SRR059/SRR059552/SRR059552.sra	SRX023091	GSM563768: POA_C57BL/6J_RNASeq_techrep1	RNA-Seq	cDNA	TRANSCRIPTOMIC	SINGLE	0	ILLUMINA	Illumina Genome Analyzer II	SRP002811	GEO Series accession: GSE22131	20616232	127583	SRS084846		10090	Mus musculus	Mus musculus	SRA020843	public	YES
SRR059553	2010-07-09 16:39:32	6345186	228426696	36	242		unspecified	ftp://ftp-private.ncbi.nlm.nih.gov/sra/sra-instant/reads/ByRun/sra/SRR/SRR059/SRR059553/SRR059553.sra	SRX023092	GSM563769: PFC_CastEiJ_RNASeq_techrep1	RNA-Seq	cDNA	TRANSCRIPTOMIC	SINGLE	0	ILLUMINA	Illumina Genome Analyzer II	SRP002811	GEO Series accession: GSE22131	20616232	127583	SRS084847		10090	Mus musculus	Mus musculus	SRA020843	public	YES
SRR059554	2010-07-09 16:39:32	6589650	237227400	36	251		unspecified	ftp://ftp-private.ncbi.nlm.nih.gov/sra/sra-instant/reads/ByRun/sra/SRR/SRR059/SRR059554/SRR059554.sra	SRX023092	GSM563769: PFC_CastEiJ_RNASeq_techrep1	RNA-Seq	cDNA	TRANSCRIPTOMIC	SINGLE	0	ILLUMINA	Illumina Genome Analyzer II	SRP002811	GEO Series accession: GSE22131	20616232	127583	SRS084847		10090	Mus musculus	Mus musculus	SRA020843	public	YES
SRR059555	2010-07-09 16:39:32	6552961	235906596	36	250		unspecified	ftp://ftp-private.ncbi.nlm.nih.gov/sra/sra-instant/reads/ByRun/sra/SRR/SRR059/SRR059555/SRR059555.sra	SRX023092	GSM563769: PFC_CastEiJ_RNASeq_techrep1	RNA-Seq	cDNA	TRANSCRIPTOMIC	SINGLE	0	ILLUMINA	Illumina Genome Analyzer II	SRP002811	GEO Series accession: GSE22131	20616232	127583	SRS084847		10090	Mus musculus	Mus musculus	SRA020843	public	YES
SRR059556	2010-07-09 16:39:32	6536273	235305828	36	249		unspecified	ftp://ftp-private.ncbi.nlm.nih.gov/sra/sra-instant/reads/ByRun/sra/SRR/SRR059/SRR059556/SRR059556.sra	SRX023092	GSM563769: PFC_CastEiJ_RNASeq_techrep1	RNA-Seq	cDNA	TRANSCRIPTOMIC	SINGLE	0	ILLUMINA	Illumina Genome Analyzer II	SRP002811	GEO Series accession: GSE22131	20616232	127583	SRS084847		10090	Mus musculus	Mus musculus	SRA020843	public	YES
SRR059557	2010-07-09 16:39:32	6477175	233178300	36	247		unspecified	ftp://ftp-private.ncbi.nlm.nih.gov/sra/sra-instant/reads/ByRun/sra/SRR/SRR059/SRR059557/SRR059557.sra	SRX023092	GSM563769: PFC_CastEiJ_RNASeq_techrep1	RNA-Seq	cDNA	TRANSCRIPTOMIC	SINGLE	0	ILLUMINA	Illumina Genome Analyzer II	SRP002811	GEO Series accession: GSE22131	20616232	127583	SRS084847		10090	Mus musculus	Mus musculus	SRA020843	public	YES
SRR059558	2010-07-09 16:39:32	6438252	231777072	36	245		unspecified	ftp://ftp-private.ncbi.nlm.nih.gov/sra/sra-instant/reads/ByRun/sra/SRR/SRR059/SRR059558/SRR059558.sra	SRX023092	GSM563769: PFC_CastEiJ_RNASeq_techrep1	RNA-Seq	cDNA	TRANSCRIPTOMIC	SINGLE	0	ILLUMINA	Illumina Genome Analyzer II	SRP002811	GEO Series accession: GSE22131	20616232	127583	SRS084847		10090	Mus musculus	Mus musculus	SRA020843	public	YES
SRR059559	2010-07-09 16:39:32	6358849	228918564	36	242		unspecified	ftp://ftp-private.ncbi.nlm.nih.gov/sra/sra-instant/reads/ByRun/sra/SRR/SRR059/SRR059559/SRR059559.sra	SRX023092	GSM563769: PFC_CastEiJ_RNASeq_techrep1	RNA-Seq	cDNA	TRANSCRIPTOMIC	SINGLE	0	ILLUMINA	Illumina Genome Analyzer II	SRP002811	GEO Series accession: GSE22131	20616232	127583	SRS084847		10090	Mus musculus	Mus musculus	SRA020843	public	YES
SRR059560	2010-07-09 16:39:32	5845929	210453444	36	223		unspecified	ftp://ftp-private.ncbi.nlm.nih.gov/sra/sra-instant/reads/ByRun/sra/SRR/SRR059/SRR059560/SRR059560.sra	SRX023093	GSM563770: PFC_C57BL/6J_RNASeq_techrep1	RNA-Seq	cDNA	TRANSCRIPTOMIC	SINGLE	0	ILLUMINA	Illumina Genome Analyzer II	SRP002811	GEO Series accession: GSE22131	20616232	127583	SRS084848		10090	Mus musculus	Mus musculus	SRA020843	public	YES
SRR059561	2010-07-09 16:39:32	5962957	214666452	36	227		unspecified	ftp://ftp-private.ncbi.nlm.nih.gov/sra/sra-instant/reads/ByRun/sra/SRR/SRR059/SRR059561/SRR059561.sra	SRX023093	GSM563770: PFC_C57BL/6J_RNASeq_techrep1	RNA-Seq	cDNA	TRANSCRIPTOMIC	SINGLE	0	ILLUMINA	Illumina Genome Analyzer II	SRP002811	GEO Series accession: GSE22131	20616232	127583	SRS084848		10090	Mus musculus	Mus musculus	SRA020843	public	YES
SRR059562	2010-07-09 16:39:32	5951101	214239636	36	227		unspecified	ftp://ftp-private.ncbi.nlm.nih.gov/sra/sra-instant/reads/ByRun/sra/SRR/SRR059/SRR059562/SRR059562.sra	SRX023093	GSM563770: PFC_C57BL/6J_RNASeq_techrep1	RNA-Seq	cDNA	TRANSCRIPTOMIC	SINGLE	0	ILLUMINA	Illumina Genome Analyzer II	SRP002811	GEO Series accession: GSE22131	20616232	127583	SRS084848		10090	Mus musculus	Mus musculus	SRA020843	public	YES
SRR059563	2010-07-09 16:39:32	5865453	211156308	36	223		unspecified	ftp://ftp-private.ncbi.nlm.nih.gov/sra/sra-instant/reads/ByRun/sra/SRR/SRR059/SRR059563/SRR059563.sra	SRX023093	GSM563770: PFC_C57BL/6J_RNASeq_techrep1	RNA-Seq	cDNA	TRANSCRIPTOMIC	SINGLE	0	ILLUMINA	Illumina Genome Analyzer II	SRP002811	GEO Series accession: GSE22131	20616232	127583	SRS084848		10090	Mus musculus	Mus musculus	SRA020843	public	YES
SRR059564	2010-07-09 16:39:32	5899876	212395536	36	225		unspecified	ftp://ftp-private.ncbi.nlm.nih.gov/sra/sra-instant/reads/ByRun/sra/SRR/SRR059/SRR059564/SRR059564.sra	SRX023093	GSM563770: PFC_C57BL/6J_RNASeq_techrep1	RNA-Seq	cDNA	TRANSCRIPTOMIC	SINGLE	0	ILLUMINA	Illumina Genome Analyzer II	SRP002811	GEO Series accession: GSE22131	20616232	127583	SRS084848		10090	Mus musculus	Mus musculus	SRA020843	public	YES
SRR059565	2010-07-09 16:39:32	5944989	214019604	36	226		unspecified	ftp://ftp-private.ncbi.nlm.nih.gov/sra/sra-instant/reads/ByRun/sra/SRR/SRR059/SRR059565/SRR059565.sra	SRX023093	GSM563770: PFC_C57BL/6J_RNASeq_techrep1	RNA-Seq	cDNA	TRANSCRIPTOMIC	SINGLE	0	ILLUMINA	Illumina Genome Analyzer II	SRP002811	GEO Series accession: GSE22131	20616232	127583	SRS084848		10090	Mus musculus	Mus musculus	SRA020843	public	YES
SRR059566	2010-07-09 16:39:32	5814378	209317608	36	221		unspecified	ftp://ftp-private.ncbi.nlm.nih.gov/sra/sra-instant/reads/ByRun/sra/SRR/SRR059/SRR059566/SRR059566.sra	SRX023093	GSM563770: PFC_C57BL/6J_RNASeq_techrep1	RNA-Seq	cDNA	TRANSCRIPTOMIC	SINGLE	0	ILLUMINA	Illumina Genome Analyzer II	SRP002811	GEO Series accession: GSE22131	20616232	127583	SRS084848		10090	Mus musculus	Mus musculus	SRA020843	public	YES
SRR059567	2010-07-09 16:39:32	4512699	162457164	36	172		unspecified	ftp://ftp-private.ncbi.nlm.nih.gov/sra/sra-instant/reads/ByRun/sra/SRR/SRR059/SRR059567/SRR059567.sra	SRX023094	GSM563771: E15_F1i_RNASeq_techrep1	RNA-Seq	cDNA	TRANSCRIPTOMIC	SINGLE	0	ILLUMINA	Illumina Genome Analyzer II	SRP002811	GEO Series accession: GSE22131	20616232	127583	SRS084849		10090	Mus musculus	Mus musculus	SRA020843	public	YES
SRR059568	2010-07-09 16:39:32	4502880	162103680	36	171		unspecified	ftp://ftp-private.ncbi.nlm.nih.gov/sra/sra-instant/reads/ByRun/sra/SRR/SRR059/SRR059568/SRR059568.sra	SRX023094	GSM563771: E15_F1i_RNASeq_techrep1	RNA-Seq	cDNA	TRANSCRIPTOMIC	SINGLE	0	ILLUMINA	Illumina Genome Analyzer II	SRP002811	GEO Series accession: GSE22131	20616232	127583	SRS084849		10090	Mus musculus	Mus musculus	SRA020843	public	YES
SRR059569	2010-07-09 16:39:32	4568136	164452896	36	174		unspecified	ftp://ftp-private.ncbi.nlm.nih.gov/sra/sra-instant/reads/ByRun/sra/SRR/SRR059/SRR059569/SRR059569.sra	SRX023094	GSM563771: E15_F1i_RNASeq_techrep1	RNA-Seq	cDNA	TRANSCRIPTOMIC	SINGLE	0	ILLUMINA	Illumina Genome Analyzer II	SRP002811	GEO Series accession: GSE22131	20616232	127583	SRS084849		10090	Mus musculus	Mus musculus	SRA020843	public	YES
SRR059570	2010-07-09 16:39:32	4696274	169065864	36	179		unspecified	ftp://ftp-private.ncbi.nlm.nih.gov/sra/sra-instant/reads/ByRun/sra/SRR/SRR059/SRR059570/SRR059570.sra	SRX023094	GSM563771: E15_F1i_RNASeq_techrep1	RNA-Seq	cDNA	TRANSCRIPTOMIC	SINGLE	0	ILLUMINA	Illumina Genome Analyzer II	SRP002811	GEO Series accession: GSE22131	20616232	127583	SRS084849		10090	Mus musculus	Mus musculus	SRA020843	public	YES
SRR059571	2010-07-09 16:39:32	4698698	169153128	36	179		unspecified	ftp://ftp-private.ncbi.nlm.nih.gov/sra/sra-instant/reads/ByRun/sra/SRR/SRR059/SRR059571/SRR059571.sra	SRX023094	GSM563771: E15_F1i_RNASeq_techrep1	RNA-Seq	cDNA	TRANSCRIPTOMIC	SINGLE	0	ILLUMINA	Illumina Genome Analyzer II	SRP002811	GEO Series accession: GSE22131	20616232	127583	SRS084849		10090	Mus musculus	Mus musculus	SRA020843	public	YES
SRR059572	2010-07-09 16:39:32	4660349	167772564	36	177		unspecified	ftp://ftp-private.ncbi.nlm.nih.gov/sra/sra-instant/reads/ByRun/sra/SRR/SRR059/SRR059572/SRR059572.sra	SRX023094	GSM563771: E15_F1i_RNASeq_techrep1	RNA-Seq	cDNA	TRANSCRIPTOMIC	SINGLE	0	ILLUMINA	Illumina Genome Analyzer II	SRP002811	GEO Series accession: GSE22131	20616232	127583	SRS084849		10090	Mus musculus	Mus musculus	SRA020843	public	YES
SRR059573	2010-07-09 16:39:32	4684861	168654996	36	178		unspecified	ftp://ftp-private.ncbi.nlm.nih.gov/sra/sra-instant/reads/ByRun/sra/SRR/SRR059/SRR059573/SRR059573.sra	SRX023094	GSM563771: E15_F1i_RNASeq_techrep1	RNA-Seq	cDNA	TRANSCRIPTOMIC	SINGLE	0	ILLUMINA	Illumina Genome Analyzer II	SRP002811	GEO Series accession: GSE22131	20616232	127583	SRS084849		10090	Mus musculus	Mus musculus	SRA020843	public	YES
SRR059574	2010-07-09 16:39:32	4672201	168199236	36	178		unspecified	ftp://ftp-private.ncbi.nlm.nih.gov/sra/sra-instant/reads/ByRun/sra/SRR/SRR059/SRR059574/SRR059574.sra	SRX023094	GSM563771: E15_F1i_RNASeq_techrep1	RNA-Seq	cDNA	TRANSCRIPTOMIC	SINGLE	0	ILLUMINA	Illumina Genome Analyzer II	SRP002811	GEO Series accession: GSE22131	20616232	127583	SRS084849		10090	Mus musculus	Mus musculus	SRA020843	public	YES
SRR059575	2010-07-09 16:39:32	4141460	149092560	36	157		unspecified	ftp://ftp-private.ncbi.nlm.nih.gov/sra/sra-instant/reads/ByRun/sra/SRR/SRR059/SRR059575/SRR059575.sra	SRX023095	GSM563772: E15_F1r_RNASeq_techrep1	RNA-Seq	cDNA	TRANSCRIPTOMIC	SINGLE	0	ILLUMINA	Illumina Genome Analyzer II	SRP002811	GEO Series accession: GSE22131	20616232	127583	SRS084850		10090	Mus musculus	Mus musculus	SRA020843	public	YES
SRR059576	2010-07-09 16:39:32	5021278	180766008	36	191		unspecified	ftp://ftp-private.ncbi.nlm.nih.gov/sra/sra-instant/reads/ByRun/sra/SRR/SRR059/SRR059576/SRR059576.sra	SRX023095	GSM563772: E15_F1r_RNASeq_techrep1	RNA-Seq	cDNA	TRANSCRIPTOMIC	SINGLE	0	ILLUMINA	Illumina Genome Analyzer II	SRP002811	GEO Series accession: GSE22131	20616232	127583	SRS084850		10090	Mus musculus	Mus musculus	SRA020843	public	YES
SRR059577	2010-07-09 16:39:32	5240357	188652852	36	199		unspecified	ftp://ftp-private.ncbi.nlm.nih.gov/sra/sra-instant/reads/ByRun/sra/SRR/SRR059/SRR059577/SRR059577.sra	SRX023095	GSM563772: E15_F1r_RNASeq_techrep1	RNA-Seq	cDNA	TRANSCRIPTOMIC	SINGLE	0	ILLUMINA	Illumina Genome Analyzer II	SRP002811	GEO Series accession: GSE22131	20616232	127583	SRS084850		10090	Mus musculus	Mus musculus	SRA020843	public	YES
SRR059578	2010-07-09 16:39:32	5500331	198011916	36	209		unspecified	ftp://ftp-private.ncbi.nlm.nih.gov/sra/sra-instant/reads/ByRun/sra/SRR/SRR059/SRR059578/SRR059578.sra	SRX023095	GSM563772: E15_F1r_RNASeq_techrep1	RNA-Seq	cDNA	TRANSCRIPTOMIC	SINGLE	0	ILLUMINA	Illumina Genome Analyzer II	SRP002811	GEO Series accession: GSE22131	20616232	127583	SRS084850		10090	Mus musculus	Mus musculus	SRA020843	public	YES
SRR059579	2010-07-09 16:39:32	5732956	206386416	36	218		unspecified	ftp://ftp-private.ncbi.nlm.nih.gov/sra/sra-instant/reads/ByRun/sra/SRR/SRR059/SRR059579/SRR059579.sra	SRX023095	GSM563772: E15_F1r_RNASeq_techrep1	RNA-Seq	cDNA	TRANSCRIPTOMIC	SINGLE	0	ILLUMINA	Illumina Genome Analyzer II	SRP002811	GEO Series accession: GSE22131	20616232	127583	SRS084850		10090	Mus musculus	Mus musculus	SRA020843	public	YES
SRR059580	2010-07-09 16:39:32	5526479	198953244	36	210		unspecified	ftp://ftp-private.ncbi.nlm.nih.gov/sra/sra-instant/reads/ByRun/sra/SRR/SRR059/SRR059580/SRR059580.sra	SRX023095	GSM563772: E15_F1r_RNASeq_techrep1	RNA-Seq	cDNA	TRANSCRIPTOMIC	SINGLE	0	ILLUMINA	Illumina Genome Analyzer II	SRP002811	GEO Series accession: GSE22131	20616232	127583	SRS084850		10090	Mus musculus	Mus musculus	SRA020843	public	YES
SRR059581	2010-07-09 16:39:32	5400273	194409828	36	206		unspecified	ftp://ftp-private.ncbi.nlm.nih.gov/sra/sra-instant/reads/ByRun/sra/SRR/SRR059/SRR059581/SRR059581.sra	SRX023095	GSM563772: E15_F1r_RNASeq_techrep1	RNA-Seq	cDNA	TRANSCRIPTOMIC	SINGLE	0	ILLUMINA	Illumina Genome Analyzer II	SRP002811	GEO Series accession: GSE22131	20616232	127583	SRS084850		10090	Mus musculus	Mus musculus	SRA020843	public	YES
SRR059582	2010-07-09 16:39:32	5284973	190259028	36	201		unspecified	ftp://ftp-private.ncbi.nlm.nih.gov/sra/sra-instant/reads/ByRun/sra/SRR/SRR059/SRR059582/SRR059582.sra	SRX023095	GSM563772: E15_F1r_RNASeq_techrep1	RNA-Seq	cDNA	TRANSCRIPTOMIC	SINGLE	0	ILLUMINA	Illumina Genome Analyzer II	SRP002811	GEO Series accession: GSE22131	20616232	127583	SRS084850		10090	Mus musculus	Mus musculus	SRA020843	public	YES
SRR059583	2010-07-09 16:39:32	4079035	130529120	32	140		unspecified	ftp://ftp-private.ncbi.nlm.nih.gov/sra/sra-instant/reads/ByRun/sra/SRR/SRR059/SRR059583/SRR059583.sra	SRX023096	GSM563773: POA_F1i_Male_RNASeq_techrep1	RNA-Seq	cDNA	TRANSCRIPTOMIC	SINGLE	0	ILLUMINA	Illumina Genome Analyzer II	SRP002811	GEO Series accession: GSE22131	20616232	127583	SRS084851		10090	Mus musculus	Mus musculus	SRA020843	public	YES
SRR059584	2010-07-09 16:39:32	1700286	54409152	32	58		unspecified	ftp://ftp-private.ncbi.nlm.nih.gov/sra/sra-instant/reads/ByRun/sra/SRR/SRR059/SRR059584/SRR059584.sra	SRX023096	GSM563773: POA_F1i_Male_RNASeq_techrep1	RNA-Seq	cDNA	TRANSCRIPTOMIC	SINGLE	0	ILLUMINA	Illumina Genome Analyzer II	SRP002811	GEO Series accession: GSE22131	20616232	127583	SRS084851		10090	Mus musculus	Mus musculus	SRA020843	public	YES
SRR059585	2010-07-09 16:39:32	4218704	134998528	32	144		unspecified	ftp://ftp-private.ncbi.nlm.nih.gov/sra/sra-instant/reads/ByRun/sra/SRR/SRR059/SRR059585/SRR059585.sra	SRX023096	GSM563773: POA_F1i_Male_RNASeq_techrep1	RNA-Seq	cDNA	TRANSCRIPTOMIC	SINGLE	0	ILLUMINA	Illumina Genome Analyzer II	SRP002811	GEO Series accession: GSE22131	20616232	127583	SRS084851		10090	Mus musculus	Mus musculus	SRA020843	public	YES
SRR059586	2010-07-09 16:39:32	4074502	130384064	32	139		unspecified	ftp://ftp-private.ncbi.nlm.nih.gov/sra/sra-instant/reads/ByRun/sra/SRR/SRR059/SRR059586/SRR059586.sra	SRX023096	GSM563773: POA_F1i_Male_RNASeq_techrep1	RNA-Seq	cDNA	TRANSCRIPTOMIC	SINGLE	0	ILLUMINA	Illumina Genome Analyzer II	SRP002811	GEO Series accession: GSE22131	20616232	127583	SRS084851		10090	Mus musculus	Mus musculus	SRA020843	public	YES
SRR059587	2010-07-09 16:39:32	3947372	126315904	32	135		unspecified	ftp://ftp-private.ncbi.nlm.nih.gov/sra/sra-instant/reads/ByRun/sra/SRR/SRR059/SRR059587/SRR059587.sra	SRX023096	GSM563773: POA_F1i_Male_RNASeq_techrep1	RNA-Seq	cDNA	TRANSCRIPTOMIC	SINGLE	0	ILLUMINA	Illumina Genome Analyzer II	SRP002811	GEO Series accession: GSE22131	20616232	127583	SRS084851		10090	Mus musculus	Mus musculus	SRA020843	public	YES
SRR059588	2010-07-09 16:39:32	3180446	101774272	32	109		unspecified	ftp://ftp-private.ncbi.nlm.nih.gov/sra/sra-instant/reads/ByRun/sra/SRR/SRR059/SRR059588/SRR059588.sra	SRX023097	GSM563774: POA_F1r_Male_RNASeq_techrep1	RNA-Seq	cDNA	TRANSCRIPTOMIC	SINGLE	0	ILLUMINA	Illumina Genome Analyzer II	SRP002811	GEO Series accession: GSE22131	20616232	127583	SRS084852		10090	Mus musculus	Mus musculus	SRA020843	public	YES
SRR059589	2010-07-09 16:39:32	3159182	101093824	32	108		unspecified	ftp://ftp-private.ncbi.nlm.nih.gov/sra/sra-instant/reads/ByRun/sra/SRR/SRR059/SRR059589/SRR059589.sra	SRX023097	GSM563774: POA_F1r_Male_RNASeq_techrep1	RNA-Seq	cDNA	TRANSCRIPTOMIC	SINGLE	0	ILLUMINA	Illumina Genome Analyzer II	SRP002811	GEO Series accession: GSE22131	20616232	127583	SRS084852		10090	Mus musculus	Mus musculus	SRA020843	public	YES
SRR059590	2010-07-09 16:39:32	3160135	101124320	32	108		unspecified	ftp://ftp-private.ncbi.nlm.nih.gov/sra/sra-instant/reads/ByRun/sra/SRR/SRR059/SRR059590/SRR059590.sra	SRX023097	GSM563774: POA_F1r_Male_RNASeq_techrep1	RNA-Seq	cDNA	TRANSCRIPTOMIC	SINGLE	0	ILLUMINA	Illumina Genome Analyzer II	SRP002811	GEO Series accession: GSE22131	20616232	127583	SRS084852		10090	Mus musculus	Mus musculus	SRA020843	public	YES
SRR059591	2010-07-09 16:39:32	3262739	104407648	32	112		unspecified	ftp://ftp-private.ncbi.nlm.nih.gov/sra/sra-instant/reads/ByRun/sra/SRR/SRR059/SRR059591/SRR059591.sra	SRX023097	GSM563774: POA_F1r_Male_RNASeq_techrep1	RNA-Seq	cDNA	TRANSCRIPTOMIC	SINGLE	0	ILLUMINA	Illumina Genome Analyzer II	SRP002811	GEO Series accession: GSE22131	20616232	127583	SRS084852		10090	Mus musculus	Mus musculus	SRA020843	public	YES
SRR059592	2010-07-09 16:39:32	2608031	83456992	32	89		unspecified	ftp://ftp-private.ncbi.nlm.nih.gov/sra/sra-instant/reads/ByRun/sra/SRR/SRR059/SRR059592/SRR059592.sra	SRX023097	GSM563774: POA_F1r_Male_RNASeq_techrep1	RNA-Seq	cDNA	TRANSCRIPTOMIC	SINGLE	0	ILLUMINA	Illumina Genome Analyzer II	SRP002811	GEO Series accession: GSE22131	20616232	127583	SRS084852		10090	Mus musculus	Mus musculus	SRA020843	public	YES
SRR059593	2010-07-09 16:39:32	4888367	175981212	36	186		unspecified	ftp://ftp-private.ncbi.nlm.nih.gov/sra/sra-instant/reads/ByRun/sra/SRR/SRR059/SRR059593/SRR059593.sra	SRX023098	GSM563775: PFC_F1i_Male_RNASeq_techrep1	RNA-Seq	cDNA	TRANSCRIPTOMIC	SINGLE	0	ILLUMINA	Illumina Genome Analyzer II	SRP002811	GEO Series accession: GSE22131	20616232	127583	SRS084853		10090	Mus musculus	Mus musculus	SRA020843	public	YES
SRR059594	2010-07-09 16:39:32	5153689	185532804	36	196		unspecified	ftp://ftp-private.ncbi.nlm.nih.gov/sra/sra-instant/reads/ByRun/sra/SRR/SRR059/SRR059594/SRR059594.sra	SRX023098	GSM563775: PFC_F1i_Male_RNASeq_techrep1	RNA-Seq	cDNA	TRANSCRIPTOMIC	SINGLE	0	ILLUMINA	Illumina Genome Analyzer II	SRP002811	GEO Series accession: GSE22131	20616232	127583	SRS084853		10090	Mus musculus	Mus musculus	SRA020843	public	YES
SRR059595	2010-07-09 16:39:32	5156870	185647320	36	196		unspecified	ftp://ftp-private.ncbi.nlm.nih.gov/sra/sra-instant/reads/ByRun/sra/SRR/SRR059/SRR059595/SRR059595.sra	SRX023098	GSM563775: PFC_F1i_Male_RNASeq_techrep1	RNA-Seq	cDNA	TRANSCRIPTOMIC	SINGLE	0	ILLUMINA	Illumina Genome Analyzer II	SRP002811	GEO Series accession: GSE22131	20616232	127583	SRS084853		10090	Mus musculus	Mus musculus	SRA020843	public	YES
SRR059596	2010-07-09 16:39:32	5105107	183783852	36	194		unspecified	ftp://ftp-private.ncbi.nlm.nih.gov/sra/sra-instant/reads/ByRun/sra/SRR/SRR059/SRR059596/SRR059596.sra	SRX023098	GSM563775: PFC_F1i_Male_RNASeq_techrep1	RNA-Seq	cDNA	TRANSCRIPTOMIC	SINGLE	0	ILLUMINA	Illumina Genome Analyzer II	SRP002811	GEO Series accession: GSE22131	20616232	127583	SRS084853		10090	Mus musculus	Mus musculus	SRA020843	public	YES
SRR059597	2010-07-09 16:39:32	5026848	180966528	36	191		unspecified	ftp://ftp-private.ncbi.nlm.nih.gov/sra/sra-instant/reads/ByRun/sra/SRR/SRR059/SRR059597/SRR059597.sra	SRX023098	GSM563775: PFC_F1i_Male_RNASeq_techrep1	RNA-Seq	cDNA	TRANSCRIPTOMIC	SINGLE	0	ILLUMINA	Illumina Genome Analyzer II	SRP002811	GEO Series accession: GSE22131	20616232	127583	SRS084853		10090	Mus musculus	Mus musculus	SRA020843	public	YES
SRR059598	2010-07-09 16:39:32	5080765	182907540	36	193		unspecified	ftp://ftp-private.ncbi.nlm.nih.gov/sra/sra-instant/reads/ByRun/sra/SRR/SRR059/SRR059598/SRR059598.sra	SRX023098	GSM563775: PFC_F1i_Male_RNASeq_techrep1	RNA-Seq	cDNA	TRANSCRIPTOMIC	SINGLE	0	ILLUMINA	Illumina Genome Analyzer II	SRP002811	GEO Series accession: GSE22131	20616232	127583	SRS084853		10090	Mus musculus	Mus musculus	SRA020843	public	YES
SRR059599	2010-07-09 16:39:32	5125509	184518324	36	195		unspecified	ftp://ftp-private.ncbi.nlm.nih.gov/sra/sra-instant/reads/ByRun/sra/SRR/SRR059/SRR059599/SRR059599.sra	SRX023098	GSM563775: PFC_F1i_Male_RNASeq_techrep1	RNA-Seq	cDNA	TRANSCRIPTOMIC	SINGLE	0	ILLUMINA	Illumina Genome Analyzer II	SRP002811	GEO Series accession: GSE22131	20616232	127583	SRS084853		10090	Mus musculus	Mus musculus	SRA020843	public	YES
SRR059600	2010-07-09 16:39:32	4965430	178755480	36	189		unspecified	ftp://ftp-private.ncbi.nlm.nih.gov/sra/sra-instant/reads/ByRun/sra/SRR/SRR059/SRR059600/SRR059600.sra	SRX023098	GSM563775: PFC_F1i_Male_RNASeq_techrep1	RNA-Seq	cDNA	TRANSCRIPTOMIC	SINGLE	0	ILLUMINA	Illumina Genome Analyzer II	SRP002811	GEO Series accession: GSE22131	20616232	127583	SRS084853		10090	Mus musculus	Mus musculus	SRA020843	public	YES
SRR059601	2010-07-09 16:39:32	6146937	221289732	36	234		unspecified	ftp://ftp-private.ncbi.nlm.nih.gov/sra/sra-instant/reads/ByRun/sra/SRR/SRR059/SRR059601/SRR059601.sra	SRX023099	GSM563776: PFC_F1r_Male_RNASeq_techrep1	RNA-Seq	cDNA	TRANSCRIPTOMIC	SINGLE	0	ILLUMINA	Illumina Genome Analyzer II	SRP002811	GEO Series accession: GSE22131	20616232	127583	SRS084854		10090	Mus musculus	Mus musculus	SRA020843	public	YES
SRR059602	2010-07-09 16:39:32	6223584	224049024	36	237		unspecified	ftp://ftp-private.ncbi.nlm.nih.gov/sra/sra-instant/reads/ByRun/sra/SRR/SRR059/SRR059602/SRR059602.sra	SRX023099	GSM563776: PFC_F1r_Male_RNASeq_techrep1	RNA-Seq	cDNA	TRANSCRIPTOMIC	SINGLE	0	ILLUMINA	Illumina Genome Analyzer II	SRP002811	GEO Series accession: GSE22131	20616232	127583	SRS084854		10090	Mus musculus	Mus musculus	SRA020843	public	YES
SRR059603	2010-07-09 16:39:32	6246107	224859852	36	238		unspecified	ftp://ftp-private.ncbi.nlm.nih.gov/sra/sra-instant/reads/ByRun/sra/SRR/SRR059/SRR059603/SRR059603.sra	SRX023099	GSM563776: PFC_F1r_Male_RNASeq_techrep1	RNA-Seq	cDNA	TRANSCRIPTOMIC	SINGLE	0	ILLUMINA	Illumina Genome Analyzer II	SRP002811	GEO Series accession: GSE22131	20616232	127583	SRS084854		10090	Mus musculus	Mus musculus	SRA020843	public	YES
SRR059604	2010-07-09 16:39:32	6300022	226800792	36	240		unspecified	ftp://ftp-private.ncbi.nlm.nih.gov/sra/sra-instant/reads/ByRun/sra/SRR/SRR059/SRR059604/SRR059604.sra	SRX023099	GSM563776: PFC_F1r_Male_RNASeq_techrep1	RNA-Seq	cDNA	TRANSCRIPTOMIC	SINGLE	0	ILLUMINA	Illumina Genome Analyzer II	SRP002811	GEO Series accession: GSE22131	20616232	127583	SRS084854		10090	Mus musculus	Mus musculus	SRA020843	public	YES
SRR059605	2010-07-09 16:39:32	6422864	231223104	36	245		unspecified	ftp://ftp-private.ncbi.nlm.nih.gov/sra/sra-instant/reads/ByRun/sra/SRR/SRR059/SRR059605/SRR059605.sra	SRX023099	GSM563776: PFC_F1r_Male_RNASeq_techrep1	RNA-Seq	cDNA	TRANSCRIPTOMIC	SINGLE	0	ILLUMINA	Illumina Genome Analyzer II	SRP002811	GEO Series accession: GSE22131	20616232	127583	SRS084854		10090	Mus musculus	Mus musculus	SRA020843	public	YES
SRR059606	2010-07-09 16:39:32	6451532	232255152	36	246		unspecified	ftp://ftp-private.ncbi.nlm.nih.gov/sra/sra-instant/reads/ByRun/sra/SRR/SRR059/SRR059606/SRR059606.sra	SRX023099	GSM563776: PFC_F1r_Male_RNASeq_techrep1	RNA-Seq	cDNA	TRANSCRIPTOMIC	SINGLE	0	ILLUMINA	Illumina Genome Analyzer II	SRP002811	GEO Series accession: GSE22131	20616232	127583	SRS084854		10090	Mus musculus	Mus musculus	SRA020843	public	YES
SRR059607	2010-07-09 16:39:32	6453404	232322544	36	246		unspecified	ftp://ftp-private.ncbi.nlm.nih.gov/sra/sra-instant/reads/ByRun/sra/SRR/SRR059/SRR059607/SRR059607.sra	SRX023099	GSM563776: PFC_F1r_Male_RNASeq_techrep1	RNA-Seq	cDNA	TRANSCRIPTOMIC	SINGLE	0	ILLUMINA	Illumina Genome Analyzer II	SRP002811	GEO Series accession: GSE22131	20616232	127583	SRS084854		10090	Mus musculus	Mus musculus	SRA020843	public	YES
SRR059608	2010-07-09 16:39:32	20798	748728	36	0		unspecified	ftp://ftp-private.ncbi.nlm.nih.gov/sra/sra-instant/reads/ByRun/sra/SRR/SRR059/SRR059608/SRR059608.sra	SRX023099	GSM563776: PFC_F1r_Male_RNASeq_techrep1	RNA-Seq	cDNA	TRANSCRIPTOMIC	SINGLE	0	ILLUMINA	Illumina Genome Analyzer II	SRP002811	GEO Series accession: GSE22131	20616232	127583	SRS084854		10090	Mus musculus	Mus musculus	SRA020843	public	YES
SRR059609	2010-07-09 16:39:32	3279168	104933376	32	112		unspecified	ftp://ftp-private.ncbi.nlm.nih.gov/sra/sra-instant/reads/ByRun/sra/SRR/SRR059/SRR059609/SRR059609.sra	SRX023100	GSM563777: POA_F1i_Female_RNASeq_techrep1	RNA-Seq	cDNA	TRANSCRIPTOMIC	SINGLE	0	ILLUMINA	Illumina Genome Analyzer II	SRP002811	GEO Series accession: GSE22131	20616232	127583	SRS084855		10090	Mus musculus	Mus musculus	SRA020843	public	YES
SRR059610	2010-07-09 16:39:32	3508154	112260928	32	120		unspecified	ftp://ftp-private.ncbi.nlm.nih.gov/sra/sra-instant/reads/ByRun/sra/SRR/SRR059/SRR059610/SRR059610.sra	SRX023100	GSM563777: POA_F1i_Female_RNASeq_techrep1	RNA-Seq	cDNA	TRANSCRIPTOMIC	SINGLE	0	ILLUMINA	Illumina Genome Analyzer II	SRP002811	GEO Series accession: GSE22131	20616232	127583	SRS084855		10090	Mus musculus	Mus musculus	SRA020843	public	YES
SRR059611	2010-07-09 16:39:32	1429595	45747040	32	49		unspecified	ftp://ftp-private.ncbi.nlm.nih.gov/sra/sra-instant/reads/ByRun/sra/SRR/SRR059/SRR059611/SRR059611.sra	SRX023100	GSM563777: POA_F1i_Female_RNASeq_techrep1	RNA-Seq	cDNA	TRANSCRIPTOMIC	SINGLE	0	ILLUMINA	Illumina Genome Analyzer II	SRP002811	GEO Series accession: GSE22131	20616232	127583	SRS084855		10090	Mus musculus	Mus musculus	SRA020843	public	YES
SRR059612	2010-07-09 16:39:32	3489622	111667904	32	119		unspecified	ftp://ftp-private.ncbi.nlm.nih.gov/sra/sra-instant/reads/ByRun/sra/SRR/SRR059/SRR059612/SRR059612.sra	SRX023100	GSM563777: POA_F1i_Female_RNASeq_techrep1	RNA-Seq	cDNA	TRANSCRIPTOMIC	SINGLE	0	ILLUMINA	Illumina Genome Analyzer II	SRP002811	GEO Series accession: GSE22131	20616232	127583	SRS084855		10090	Mus musculus	Mus musculus	SRA020843	public	YES
SRR059613	2010-07-09 16:39:32	3337191	106790112	32	114		unspecified	ftp://ftp-private.ncbi.nlm.nih.gov/sra/sra-instant/reads/ByRun/sra/SRR/SRR059/SRR059613/SRR059613.sra	SRX023100	GSM563777: POA_F1i_Female_RNASeq_techrep1	RNA-Seq	cDNA	TRANSCRIPTOMIC	SINGLE	0	ILLUMINA	Illumina Genome Analyzer II	SRP002811	GEO Series accession: GSE22131	20616232	127583	SRS084855		10090	Mus musculus	Mus musculus	SRA020843	public	YES
SRR059614	2010-07-09 16:39:32	6609084	211490688	32	226		unspecified	ftp://ftp-private.ncbi.nlm.nih.gov/sra/sra-instant/reads/ByRun/sra/SRR/SRR059/SRR059614/SRR059614.sra	SRX023100	GSM563777: POA_F1i_Female_RNASeq_techrep1	RNA-Seq	cDNA	TRANSCRIPTOMIC	SINGLE	0	ILLUMINA	Illumina Genome Analyzer II	SRP002811	GEO Series accession: GSE22131	20616232	127583	SRS084855		10090	Mus musculus	Mus musculus	SRA020843	public	YES
SRR059615	2010-07-09 16:39:32	6699591	214386912	32	230		unspecified	ftp://ftp-private.ncbi.nlm.nih.gov/sra/sra-instant/reads/ByRun/sra/SRR/SRR059/SRR059615/SRR059615.sra	SRX023100	GSM563777: POA_F1i_Female_RNASeq_techrep1	RNA-Seq	cDNA	TRANSCRIPTOMIC	SINGLE	0	ILLUMINA	Illumina Genome Analyzer II	SRP002811	GEO Series accession: GSE22131	20616232	127583	SRS084855		10090	Mus musculus	Mus musculus	SRA020843	public	YES
SRR059616	2010-07-09 16:39:32	6872062	219905984	32	235		unspecified	ftp://ftp-private.ncbi.nlm.nih.gov/sra/sra-instant/reads/ByRun/sra/SRR/SRR059/SRR059616/SRR059616.sra	SRX023100	GSM563777: POA_F1i_Female_RNASeq_techrep1	RNA-Seq	cDNA	TRANSCRIPTOMIC	SINGLE	0	ILLUMINA	Illumina Genome Analyzer II	SRP002811	GEO Series accession: GSE22131	20616232	127583	SRS084855		10090	Mus musculus	Mus musculus	SRA020843	public	YES
SRR059617	2010-07-09 16:39:32	3105934	99389888	32	106		unspecified	ftp://ftp-private.ncbi.nlm.nih.gov/sra/sra-instant/reads/ByRun/sra/SRR/SRR059/SRR059617/SRR059617.sra	SRX023101	GSM563778: POA_F1r_Female_RNASeq_techrep1	RNA-Seq	cDNA	TRANSCRIPTOMIC	SINGLE	0	ILLUMINA	Illumina Genome Analyzer II	SRP002811	GEO Series accession: GSE22131	20616232	127583	SRS084856		10090	Mus musculus	Mus musculus	SRA020843	public	YES
SRR059618	2010-07-09 16:39:32	3449398	110380736	32	118		unspecified	ftp://ftp-private.ncbi.nlm.nih.gov/sra/sra-instant/reads/ByRun/sra/SRR/SRR059/SRR059618/SRR059618.sra	SRX023101	GSM563778: POA_F1r_Female_RNASeq_techrep1	RNA-Seq	cDNA	TRANSCRIPTOMIC	SINGLE	0	ILLUMINA	Illumina Genome Analyzer II	SRP002811	GEO Series accession: GSE22131	20616232	127583	SRS084856		10090	Mus musculus	Mus musculus	SRA020843	public	YES
SRR059619	2010-07-09 16:39:32	3091839	98938848	32	106		unspecified	ftp://ftp-private.ncbi.nlm.nih.gov/sra/sra-instant/reads/ByRun/sra/SRR/SRR059/SRR059619/SRR059619.sra	SRX023101	GSM563778: POA_F1r_Female_RNASeq_techrep1	RNA-Seq	cDNA	TRANSCRIPTOMIC	SINGLE	0	ILLUMINA	Illumina Genome Analyzer II	SRP002811	GEO Series accession: GSE22131	20616232	127583	SRS084856		10090	Mus musculus	Mus musculus	SRA020843	public	YES
SRR059620	2010-07-09 16:39:32	1868687	59797984	32	64		unspecified	ftp://ftp-private.ncbi.nlm.nih.gov/sra/sra-instant/reads/ByRun/sra/SRR/SRR059/SRR059620/SRR059620.sra	SRX023101	GSM563778: POA_F1r_Female_RNASeq_techrep1	RNA-Seq	cDNA	TRANSCRIPTOMIC	SINGLE	0	ILLUMINA	Illumina Genome Analyzer II	SRP002811	GEO Series accession: GSE22131	20616232	127583	SRS084856		10090	Mus musculus	Mus musculus	SRA020843	public	YES
SRR059621	2010-07-09 16:39:32	3287777	105208864	32	112		unspecified	ftp://ftp-private.ncbi.nlm.nih.gov/sra/sra-instant/reads/ByRun/sra/SRR/SRR059/SRR059621/SRR059621.sra	SRX023101	GSM563778: POA_F1r_Female_RNASeq_techrep1	RNA-Seq	cDNA	TRANSCRIPTOMIC	SINGLE	0	ILLUMINA	Illumina Genome Analyzer II	SRP002811	GEO Series accession: GSE22131	20616232	127583	SRS084856		10090	Mus musculus	Mus musculus	SRA020843	public	YES
SRR059622	2010-07-09 16:39:32	6752063	216066016	32	231		unspecified	ftp://ftp-private.ncbi.nlm.nih.gov/sra/sra-instant/reads/ByRun/sra/SRR/SRR059/SRR059622/SRR059622.sra	SRX023101	GSM563778: POA_F1r_Female_RNASeq_techrep1	RNA-Seq	cDNA	TRANSCRIPTOMIC	SINGLE	0	ILLUMINA	Illumina Genome Analyzer II	SRP002811	GEO Series accession: GSE22131	20616232	127583	SRS084856		10090	Mus musculus	Mus musculus	SRA020843	public	YES
SRR059623	2010-07-09 16:39:32	6926731	221655392	32	237		unspecified	ftp://ftp-private.ncbi.nlm.nih.gov/sra/sra-instant/reads/ByRun/sra/SRR/SRR059/SRR059623/SRR059623.sra	SRX023101	GSM563778: POA_F1r_Female_RNASeq_techrep1	RNA-Seq	cDNA	TRANSCRIPTOMIC	SINGLE	0	ILLUMINA	Illumina Genome Analyzer II	SRP002811	GEO Series accession: GSE22131	20616232	127583	SRS084856		10090	Mus musculus	Mus musculus	SRA020843	public	YES
SRR059624	2010-07-09 16:39:32	6819708	218230656	32	234		unspecified	ftp://ftp-private.ncbi.nlm.nih.gov/sra/sra-instant/reads/ByRun/sra/SRR/SRR059/SRR059624/SRR059624.sra	SRX023101	GSM563778: POA_F1r_Female_RNASeq_techrep1	RNA-Seq	cDNA	TRANSCRIPTOMIC	SINGLE	0	ILLUMINA	Illumina Genome Analyzer II	SRP002811	GEO Series accession: GSE22131	20616232	127583	SRS084856		10090	Mus musculus	Mus musculus	SRA020843	public	YES
SRR059625	2010-07-09 16:39:32	7411586	237170752	32	254		unspecified	ftp://ftp-private.ncbi.nlm.nih.gov/sra/sra-instant/reads/ByRun/sra/SRR/SRR059/SRR059625/SRR059625.sra	SRX023101	GSM563778: POA_F1r_Female_RNASeq_techrep1	RNA-Seq	cDNA	TRANSCRIPTOMIC	SINGLE	0	ILLUMINA	Illumina Genome Analyzer II	SRP002811	GEO Series accession: GSE22131	20616232	127583	SRS084856		10090	Mus musculus	Mus musculus	SRA020843	public	YES
SRR059626	2010-07-09 16:39:32	4925868	177331248	36	187		unspecified	ftp://ftp-private.ncbi.nlm.nih.gov/sra/sra-instant/reads/ByRun/sra/SRR/SRR059/SRR059626/SRR059626.sra	SRX023102	GSM563779: PFC_F1i_Female_RNASeq_techrep1	RNA-Seq	cDNA	TRANSCRIPTOMIC	SINGLE	0	ILLUMINA	Illumina Genome Analyzer II	SRP002811	GEO Series accession: GSE22131	20616232	127583	SRS084857		10090	Mus musculus	Mus musculus	SRA020843	public	YES
SRR059627	2010-07-09 16:39:32	4852762	174699432	36	185		unspecified	ftp://ftp-private.ncbi.nlm.nih.gov/sra/sra-instant/reads/ByRun/sra/SRR/SRR059/SRR059627/SRR059627.sra	SRX023102	GSM563779: PFC_F1i_Female_RNASeq_techrep1	RNA-Seq	cDNA	TRANSCRIPTOMIC	SINGLE	0	ILLUMINA	Illumina Genome Analyzer II	SRP002811	GEO Series accession: GSE22131	20616232	127583	SRS084857		10090	Mus musculus	Mus musculus	SRA020843	public	YES
SRR059628	2010-07-09 16:39:32	4822215	173599740	36	183		unspecified	ftp://ftp-private.ncbi.nlm.nih.gov/sra/sra-instant/reads/ByRun/sra/SRR/SRR059/SRR059628/SRR059628.sra	SRX023102	GSM563779: PFC_F1i_Female_RNASeq_techrep1	RNA-Seq	cDNA	TRANSCRIPTOMIC	SINGLE	0	ILLUMINA	Illumina Genome Analyzer II	SRP002811	GEO Series accession: GSE22131	20616232	127583	SRS084857		10090	Mus musculus	Mus musculus	SRA020843	public	YES
SRR059629	2010-07-09 16:39:32	4824775	173691900	36	184		unspecified	ftp://ftp-private.ncbi.nlm.nih.gov/sra/sra-instant/reads/ByRun/sra/SRR/SRR059/SRR059629/SRR059629.sra	SRX023102	GSM563779: PFC_F1i_Female_RNASeq_techrep1	RNA-Seq	cDNA	TRANSCRIPTOMIC	SINGLE	0	ILLUMINA	Illumina Genome Analyzer II	SRP002811	GEO Series accession: GSE22131	20616232	127583	SRS084857		10090	Mus musculus	Mus musculus	SRA020843	public	YES
SRR059630	2010-07-09 16:39:32	4861654	175019544	36	185		unspecified	ftp://ftp-private.ncbi.nlm.nih.gov/sra/sra-instant/reads/ByRun/sra/SRR/SRR059/SRR059630/SRR059630.sra	SRX023102	GSM563779: PFC_F1i_Female_RNASeq_techrep1	RNA-Seq	cDNA	TRANSCRIPTOMIC	SINGLE	0	ILLUMINA	Illumina Genome Analyzer II	SRP002811	GEO Series accession: GSE22131	20616232	127583	SRS084857		10090	Mus musculus	Mus musculus	SRA020843	public	YES
SRR059631	2010-07-09 16:39:32	4798980	172763280	36	183		unspecified	ftp://ftp-private.ncbi.nlm.nih.gov/sra/sra-instant/reads/ByRun/sra/SRR/SRR059/SRR059631/SRR059631.sra	SRX023102	GSM563779: PFC_F1i_Female_RNASeq_techrep1	RNA-Seq	cDNA	TRANSCRIPTOMIC	SINGLE	0	ILLUMINA	Illumina Genome Analyzer II	SRP002811	GEO Series accession: GSE22131	20616232	127583	SRS084857		10090	Mus musculus	Mus musculus	SRA020843	public	YES
SRR059632	2010-07-09 16:39:32	4845320	174431520	36	184		unspecified	ftp://ftp-private.ncbi.nlm.nih.gov/sra/sra-instant/reads/ByRun/sra/SRR/SRR059/SRR059632/SRR059632.sra	SRX023102	GSM563779: PFC_F1i_Female_RNASeq_techrep1	RNA-Seq	cDNA	TRANSCRIPTOMIC	SINGLE	0	ILLUMINA	Illumina Genome Analyzer II	SRP002811	GEO Series accession: GSE22131	20616232	127583	SRS084857		10090	Mus musculus	Mus musculus	SRA020843	public	YES
SRR059633	2010-07-09 16:39:32	4859537	174943332	36	185		unspecified	ftp://ftp-private.ncbi.nlm.nih.gov/sra/sra-instant/reads/ByRun/sra/SRR/SRR059/SRR059633/SRR059633.sra	SRX023102	GSM563779: PFC_F1i_Female_RNASeq_techrep1	RNA-Seq	cDNA	TRANSCRIPTOMIC	SINGLE	0	ILLUMINA	Illumina Genome Analyzer II	SRP002811	GEO Series accession: GSE22131	20616232	127583	SRS084857		10090	Mus musculus	Mus musculus	SRA020843	public	YES
SRR059634	2010-07-09 16:39:32	4303809	154937124	36	164		unspecified	ftp://ftp-private.ncbi.nlm.nih.gov/sra/sra-instant/reads/ByRun/sra/SRR/SRR059/SRR059634/SRR059634.sra	SRX023103	GSM563780: PFC_F1r_Female_RNASeq_techrep1	RNA-Seq	cDNA	TRANSCRIPTOMIC	SINGLE	0	ILLUMINA	Illumina Genome Analyzer II	SRP002811	GEO Series accession: GSE22131	20616232	127583	SRS084858		10090	Mus musculus	Mus musculus	SRA020843	public	YES
SRR059635	2010-07-09 16:39:32	4146075	149258700	36	158		unspecified	ftp://ftp-private.ncbi.nlm.nih.gov/sra/sra-instant/reads/ByRun/sra/SRR/SRR059/SRR059635/SRR059635.sra	SRX023103	GSM563780: PFC_F1r_Female_RNASeq_techrep1	RNA-Seq	cDNA	TRANSCRIPTOMIC	SINGLE	0	ILLUMINA	Illumina Genome Analyzer II	SRP002811	GEO Series accession: GSE22131	20616232	127583	SRS084858		10090	Mus musculus	Mus musculus	SRA020843	public	YES
SRR059636	2010-07-09 16:39:32	4130196	148687056	36	157		unspecified	ftp://ftp-private.ncbi.nlm.nih.gov/sra/sra-instant/reads/ByRun/sra/SRR/SRR059/SRR059636/SRR059636.sra	SRX023103	GSM563780: PFC_F1r_Female_RNASeq_techrep1	RNA-Seq	cDNA	TRANSCRIPTOMIC	SINGLE	0	ILLUMINA	Illumina Genome Analyzer II	SRP002811	GEO Series accession: GSE22131	20616232	127583	SRS084858		10090	Mus musculus	Mus musculus	SRA020843	public	YES
SRR059637	2010-07-09 16:39:32	3978996	143243856	36	151		unspecified	ftp://ftp-private.ncbi.nlm.nih.gov/sra/sra-instant/reads/ByRun/sra/SRR/SRR059/SRR059637/SRR059637.sra	SRX023103	GSM563780: PFC_F1r_Female_RNASeq_techrep1	RNA-Seq	cDNA	TRANSCRIPTOMIC	SINGLE	0	ILLUMINA	Illumina Genome Analyzer II	SRP002811	GEO Series accession: GSE22131	20616232	127583	SRS084858		10090	Mus musculus	Mus musculus	SRA020843	public	YES
SRR059638	2010-07-09 16:39:32	4004239	144152604	36	152		unspecified	ftp://ftp-private.ncbi.nlm.nih.gov/sra/sra-instant/reads/ByRun/sra/SRR/SRR059/SRR059638/SRR059638.sra	SRX023103	GSM563780: PFC_F1r_Female_RNASeq_techrep1	RNA-Seq	cDNA	TRANSCRIPTOMIC	SINGLE	0	ILLUMINA	Illumina Genome Analyzer II	SRP002811	GEO Series accession: GSE22131	20616232	127583	SRS084858		10090	Mus musculus	Mus musculus	SRA020843	public	YES
SRR059639	2010-07-09 16:39:32	4080750	146907000	36	155		unspecified	ftp://ftp-private.ncbi.nlm.nih.gov/sra/sra-instant/reads/ByRun/sra/SRR/SRR059/SRR059639/SRR059639.sra	SRX023103	GSM563780: PFC_F1r_Female_RNASeq_techrep1	RNA-Seq	cDNA	TRANSCRIPTOMIC	SINGLE	0	ILLUMINA	Illumina Genome Analyzer II	SRP002811	GEO Series accession: GSE22131	20616232	127583	SRS084858		10090	Mus musculus	Mus musculus	SRA020843	public	YES
SRR059640	2010-07-09 16:39:32	4059853	146154708	36	154		unspecified	ftp://ftp-private.ncbi.nlm.nih.gov/sra/sra-instant/reads/ByRun/sra/SRR/SRR059/SRR059640/SRR059640.sra	SRX023103	GSM563780: PFC_F1r_Female_RNASeq_techrep1	RNA-Seq	cDNA	TRANSCRIPTOMIC	SINGLE	0	ILLUMINA	Illumina Genome Analyzer II	SRP002811	GEO Series accession: GSE22131	20616232	127583	SRS084858		10090	Mus musculus	Mus musculus	SRA020843	public	YES
SRR059641	2010-07-09 16:39:32	4202662	151295832	36	160		unspecified	ftp://ftp-private.ncbi.nlm.nih.gov/sra/sra-instant/reads/ByRun/sra/SRR/SRR059/SRR059641/SRR059641.sra	SRX023103	GSM563780: PFC_F1r_Female_RNASeq_techrep1	RNA-Seq	cDNA	TRANSCRIPTOMIC	SINGLE	0	ILLUMINA	Illumina Genome Analyzer II	SRP002811	GEO Series accession: GSE22131	20616232	127583	SRS084858		10090	Mus musculus	Mus musculus	SRA020843	public	YES
SRR059642	2010-07-09 16:39:32	5201233	208049320	40	218		unspecified	ftp://ftp-private.ncbi.nlm.nih.gov/sra/sra-instant/reads/ByRun/sra/SRR/SRR059/SRR059642/SRR059642.sra	SRX023104	GSM563781: E15_F1i_RNASeq_techrep2	RNA-Seq	cDNA	TRANSCRIPTOMIC	SINGLE	0	ILLUMINA	Illumina Genome Analyzer II	SRP002811	GEO Series accession: GSE22131	20616232	127583	SRS084859		10090	Mus musculus	Mus musculus	SRA020843	public	YES
SRR059643	2010-07-09 16:39:32	5360479	214419160	40	224		unspecified	ftp://ftp-private.ncbi.nlm.nih.gov/sra/sra-instant/reads/ByRun/sra/SRR/SRR059/SRR059643/SRR059643.sra	SRX023104	GSM563781: E15_F1i_RNASeq_techrep2	RNA-Seq	cDNA	TRANSCRIPTOMIC	SINGLE	0	ILLUMINA	Illumina Genome Analyzer II	SRP002811	GEO Series accession: GSE22131	20616232	127583	SRS084859		10090	Mus musculus	Mus musculus	SRA020843	public	YES
SRR059644	2010-07-09 16:39:32	5420496	216819840	40	227		unspecified	ftp://ftp-private.ncbi.nlm.nih.gov/sra/sra-instant/reads/ByRun/sra/SRR/SRR059/SRR059644/SRR059644.sra	SRX023104	GSM563781: E15_F1i_RNASeq_techrep2	RNA-Seq	cDNA	TRANSCRIPTOMIC	SINGLE	0	ILLUMINA	Illumina Genome Analyzer II	SRP002811	GEO Series accession: GSE22131	20616232	127583	SRS084859		10090	Mus musculus	Mus musculus	SRA020843	public	YES
SRR059645	2010-07-09 16:39:32	5320796	212831840	40	223		unspecified	ftp://ftp-private.ncbi.nlm.nih.gov/sra/sra-instant/reads/ByRun/sra/SRR/SRR059/SRR059645/SRR059645.sra	SRX023104	GSM563781: E15_F1i_RNASeq_techrep2	RNA-Seq	cDNA	TRANSCRIPTOMIC	SINGLE	0	ILLUMINA	Illumina Genome Analyzer II	SRP002811	GEO Series accession: GSE22131	20616232	127583	SRS084859		10090	Mus musculus	Mus musculus	SRA020843	public	YES
SRR059646	2010-07-09 16:39:32	5038156	201526240	40	211		unspecified	ftp://ftp-private.ncbi.nlm.nih.gov/sra/sra-instant/reads/ByRun/sra/SRR/SRR059/SRR059646/SRR059646.sra	SRX023104	GSM563781: E15_F1i_RNASeq_techrep2	RNA-Seq	cDNA	TRANSCRIPTOMIC	SINGLE	0	ILLUMINA	Illumina Genome Analyzer II	SRP002811	GEO Series accession: GSE22131	20616232	127583	SRS084859		10090	Mus musculus	Mus musculus	SRA020843	public	YES
SRR059647	2010-07-09 16:39:32	4732708	189308320	40	198		unspecified	ftp://ftp-private.ncbi.nlm.nih.gov/sra/sra-instant/reads/ByRun/sra/SRR/SRR059/SRR059647/SRR059647.sra	SRX023104	GSM563781: E15_F1i_RNASeq_techrep2	RNA-Seq	cDNA	TRANSCRIPTOMIC	SINGLE	0	ILLUMINA	Illumina Genome Analyzer II	SRP002811	GEO Series accession: GSE22131	20616232	127583	SRS084859		10090	Mus musculus	Mus musculus	SRA020843	public	YES
SRR059648	2010-07-09 16:39:32	4636273	185450920	40	194		unspecified	ftp://ftp-private.ncbi.nlm.nih.gov/sra/sra-instant/reads/ByRun/sra/SRR/SRR059/SRR059648/SRR059648.sra	SRX023104	GSM563781: E15_F1i_RNASeq_techrep2	RNA-Seq	cDNA	TRANSCRIPTOMIC	SINGLE	0	ILLUMINA	Illumina Genome Analyzer II	SRP002811	GEO Series accession: GSE22131	20616232	127583	SRS084859		10090	Mus musculus	Mus musculus	SRA020843	public	YES
SRR059649	2010-07-09 16:39:32	5377656	215106240	40	225		unspecified	ftp://ftp-private.ncbi.nlm.nih.gov/sra/sra-instant/reads/ByRun/sra/SRR/SRR059/SRR059649/SRR059649.sra	SRX023104	GSM563781: E15_F1i_RNASeq_techrep2	RNA-Seq	cDNA	TRANSCRIPTOMIC	SINGLE	0	ILLUMINA	Illumina Genome Analyzer II	SRP002811	GEO Series accession: GSE22131	20616232	127583	SRS084859		10090	Mus musculus	Mus musculus	SRA020843	public	YES
SRR059650	2010-07-09 16:39:32	3525723	126926028	36	134		unspecified	ftp://ftp-private.ncbi.nlm.nih.gov/sra/sra-instant/reads/ByRun/sra/SRR/SRR059/SRR059650/SRR059650.sra	SRX023105	GSM563782: E15_F1r_RNASeq_techrep2	RNA-Seq	cDNA	TRANSCRIPTOMIC	SINGLE	0	ILLUMINA	Illumina Genome Analyzer II	SRP002811	GEO Series accession: GSE22131	20616232	127583	SRS084860		10090	Mus musculus	Mus musculus	SRA020843	public	YES
SRR059651	2010-07-09 16:39:32	4189665	150827940	36	159		unspecified	ftp://ftp-private.ncbi.nlm.nih.gov/sra/sra-instant/reads/ByRun/sra/SRR/SRR059/SRR059651/SRR059651.sra	SRX023105	GSM563782: E15_F1r_RNASeq_techrep2	RNA-Seq	cDNA	TRANSCRIPTOMIC	SINGLE	0	ILLUMINA	Illumina Genome Analyzer II	SRP002811	GEO Series accession: GSE22131	20616232	127583	SRS084860		10090	Mus musculus	Mus musculus	SRA020843	public	YES
SRR059652	2010-07-09 16:39:32	5469189	196890804	36	208		unspecified	ftp://ftp-private.ncbi.nlm.nih.gov/sra/sra-instant/reads/ByRun/sra/SRR/SRR059/SRR059652/SRR059652.sra	SRX023105	GSM563782: E15_F1r_RNASeq_techrep2	RNA-Seq	cDNA	TRANSCRIPTOMIC	SINGLE	0	ILLUMINA	Illumina Genome Analyzer II	SRP002811	GEO Series accession: GSE22131	20616232	127583	SRS084860		10090	Mus musculus	Mus musculus	SRA020843	public	YES
SRR059653	2010-07-09 16:39:32	6211561	223616196	36	236		unspecified	ftp://ftp-private.ncbi.nlm.nih.gov/sra/sra-instant/reads/ByRun/sra/SRR/SRR059/SRR059653/SRR059653.sra	SRX023105	GSM563782: E15_F1r_RNASeq_techrep2	RNA-Seq	cDNA	TRANSCRIPTOMIC	SINGLE	0	ILLUMINA	Illumina Genome Analyzer II	SRP002811	GEO Series accession: GSE22131	20616232	127583	SRS084860		10090	Mus musculus	Mus musculus	SRA020843	public	YES
SRR059654	2010-07-09 16:39:32	6208015	223488540	36	236		unspecified	ftp://ftp-private.ncbi.nlm.nih.gov/sra/sra-instant/reads/ByRun/sra/SRR/SRR059/SRR059654/SRR059654.sra	SRX023105	GSM563782: E15_F1r_RNASeq_techrep2	RNA-Seq	cDNA	TRANSCRIPTOMIC	SINGLE	0	ILLUMINA	Illumina Genome Analyzer II	SRP002811	GEO Series accession: GSE22131	20616232	127583	SRS084860		10090	Mus musculus	Mus musculus	SRA020843	public	YES
SRR059655	2010-07-09 16:39:32	6126860	220566960	36	233		unspecified	ftp://ftp-private.ncbi.nlm.nih.gov/sra/sra-instant/reads/ByRun/sra/SRR/SRR059/SRR059655/SRR059655.sra	SRX023105	GSM563782: E15_F1r_RNASeq_techrep2	RNA-Seq	cDNA	TRANSCRIPTOMIC	SINGLE	0	ILLUMINA	Illumina Genome Analyzer II	SRP002811	GEO Series accession: GSE22131	20616232	127583	SRS084860		10090	Mus musculus	Mus musculus	SRA020843	public	YES
SRR059656	2010-07-09 16:39:32	5863396	211082256	36	223		unspecified	ftp://ftp-private.ncbi.nlm.nih.gov/sra/sra-instant/reads/ByRun/sra/SRR/SRR059/SRR059656/SRR059656.sra	SRX023105	GSM563782: E15_F1r_RNASeq_techrep2	RNA-Seq	cDNA	TRANSCRIPTOMIC	SINGLE	0	ILLUMINA	Illumina Genome Analyzer II	SRP002811	GEO Series accession: GSE22131	20616232	127583	SRS084860		10090	Mus musculus	Mus musculus	SRA020843	public	YES
SRR059657	2010-07-09 16:39:32	5642944	203145984	36	215		unspecified	ftp://ftp-private.ncbi.nlm.nih.gov/sra/sra-instant/reads/ByRun/sra/SRR/SRR059/SRR059657/SRR059657.sra	SRX023105	GSM563782: E15_F1r_RNASeq_techrep2	RNA-Seq	cDNA	TRANSCRIPTOMIC	SINGLE	0	ILLUMINA	Illumina Genome Analyzer II	SRP002811	GEO Series accession: GSE22131	20616232	127583	SRS084860		10090	Mus musculus	Mus musculus	SRA020843	public	YES
SRR059658	2010-07-09 16:39:32	7613221	243623072	32	261		unspecified	ftp://ftp-private.ncbi.nlm.nih.gov/sra/sra-instant/reads/ByRun/sra/SRR/SRR059/SRR059658/SRR059658.sra	SRX023106	GSM563783: POA_F1i_Male_RNASeq_techrep2	RNA-Seq	cDNA	TRANSCRIPTOMIC	SINGLE	0	ILLUMINA	Illumina Genome Analyzer II	SRP002811	GEO Series accession: GSE22131	20616232	127583	SRS084861		10090	Mus musculus	Mus musculus	SRA020843	public	YES
SRR059659	2010-07-09 16:39:32	6934284	221897088	32	238		unspecified	ftp://ftp-private.ncbi.nlm.nih.gov/sra/sra-instant/reads/ByRun/sra/SRR/SRR059/SRR059659/SRR059659.sra	SRX023106	GSM563783: POA_F1i_Male_RNASeq_techrep2	RNA-Seq	cDNA	TRANSCRIPTOMIC	SINGLE	0	ILLUMINA	Illumina Genome Analyzer II	SRP002811	GEO Series accession: GSE22131	20616232	127583	SRS084861		10090	Mus musculus	Mus musculus	SRA020843	public	YES
SRR059660	2010-07-09 16:39:32	7613685	243637920	32	261		unspecified	ftp://ftp-private.ncbi.nlm.nih.gov/sra/sra-instant/reads/ByRun/sra/SRR/SRR059/SRR059660/SRR059660.sra	SRX023106	GSM563783: POA_F1i_Male_RNASeq_techrep2	RNA-Seq	cDNA	TRANSCRIPTOMIC	SINGLE	0	ILLUMINA	Illumina Genome Analyzer II	SRP002811	GEO Series accession: GSE22131	20616232	127583	SRS084861		10090	Mus musculus	Mus musculus	SRA020843	public	YES
SRR059661	2010-07-09 16:39:32	6802647	217684704	32	233		unspecified	ftp://ftp-private.ncbi.nlm.nih.gov/sra/sra-instant/reads/ByRun/sra/SRR/SRR059/SRR059661/SRR059661.sra	SRX023107	GSM563784: POA_F1r_Male_RNASeq_techrep2	RNA-Seq	cDNA	TRANSCRIPTOMIC	SINGLE	0	ILLUMINA	Illumina Genome Analyzer II	SRP002811	GEO Series accession: GSE22131	20616232	127583	SRS084862		10090	Mus musculus	Mus musculus	SRA020843	public	YES
SRR059662	2010-07-09 16:39:32	7552459	241678688	32	259		unspecified	ftp://ftp-private.ncbi.nlm.nih.gov/sra/sra-instant/reads/ByRun/sra/SRR/SRR059/SRR059662/SRR059662.sra	SRX023107	GSM563784: POA_F1r_Male_RNASeq_techrep2	RNA-Seq	cDNA	TRANSCRIPTOMIC	SINGLE	0	ILLUMINA	Illumina Genome Analyzer II	SRP002811	GEO Series accession: GSE22131	20616232	127583	SRS084862		10090	Mus musculus	Mus musculus	SRA020843	public	YES
SRR059663	2010-07-09 16:39:32	7660162	245125184	32	263		unspecified	ftp://ftp-private.ncbi.nlm.nih.gov/sra/sra-instant/reads/ByRun/sra/SRR/SRR059/SRR059663/SRR059663.sra	SRX023107	GSM563784: POA_F1r_Male_RNASeq_techrep2	RNA-Seq	cDNA	TRANSCRIPTOMIC	SINGLE	0	ILLUMINA	Illumina Genome Analyzer II	SRP002811	GEO Series accession: GSE22131	20616232	127583	SRS084862		10090	Mus musculus	Mus musculus	SRA020843	public	YES
SRR059664	2010-07-09 16:39:32	7963817	254842144	32	273		unspecified	ftp://ftp-private.ncbi.nlm.nih.gov/sra/sra-instant/reads/ByRun/sra/SRR/SRR059/SRR059664/SRR059664.sra	SRX023107	GSM563784: POA_F1r_Male_RNASeq_techrep2	RNA-Seq	cDNA	TRANSCRIPTOMIC	SINGLE	0	ILLUMINA	Illumina Genome Analyzer II	SRP002811	GEO Series accession: GSE22131	20616232	127583	SRS084862		10090	Mus musculus	Mus musculus	SRA020843	public	YES
SRR059665	2010-07-09 16:39:32	4811706	173221416	36	183		unspecified	ftp://ftp-private.ncbi.nlm.nih.gov/sra/sra-instant/reads/ByRun/sra/SRR/SRR059/SRR059665/SRR059665.sra	SRX023108	GSM563785: PFC_F1i_Male_RNASeq_techrep2	RNA-Seq	cDNA	TRANSCRIPTOMIC	SINGLE	0	ILLUMINA	Illumina Genome Analyzer II	SRP002811	GEO Series accession: GSE22131	20616232	127583	SRS084863		10090	Mus musculus	Mus musculus	SRA020843	public	YES
SRR059666	2010-07-09 16:39:32	5072986	182627496	36	193		unspecified	ftp://ftp-private.ncbi.nlm.nih.gov/sra/sra-instant/reads/ByRun/sra/SRR/SRR059/SRR059666/SRR059666.sra	SRX023108	GSM563785: PFC_F1i_Male_RNASeq_techrep2	RNA-Seq	cDNA	TRANSCRIPTOMIC	SINGLE	0	ILLUMINA	Illumina Genome Analyzer II	SRP002811	GEO Series accession: GSE22131	20616232	127583	SRS084863		10090	Mus musculus	Mus musculus	SRA020843	public	YES
SRR059667	2010-07-09 16:39:32	5088132	183172752	36	194		unspecified	ftp://ftp-private.ncbi.nlm.nih.gov/sra/sra-instant/reads/ByRun/sra/SRR/SRR059/SRR059667/SRR059667.sra	SRX023108	GSM563785: PFC_F1i_Male_RNASeq_techrep2	RNA-Seq	cDNA	TRANSCRIPTOMIC	SINGLE	0	ILLUMINA	Illumina Genome Analyzer II	SRP002811	GEO Series accession: GSE22131	20616232	127583	SRS084863		10090	Mus musculus	Mus musculus	SRA020843	public	YES
SRR059668	2010-07-09 16:39:32	5233453	188404308	36	199		unspecified	ftp://ftp-private.ncbi.nlm.nih.gov/sra/sra-instant/reads/ByRun/sra/SRR/SRR059/SRR059668/SRR059668.sra	SRX023108	GSM563785: PFC_F1i_Male_RNASeq_techrep2	RNA-Seq	cDNA	TRANSCRIPTOMIC	SINGLE	0	ILLUMINA	Illumina Genome Analyzer II	SRP002811	GEO Series accession: GSE22131	20616232	127583	SRS084863		10090	Mus musculus	Mus musculus	SRA020843	public	YES
SRR059669	2010-07-09 16:39:32	5369549	193303764	36	204		unspecified	ftp://ftp-private.ncbi.nlm.nih.gov/sra/sra-instant/reads/ByRun/sra/SRR/SRR059/SRR059669/SRR059669.sra	SRX023109	GSM563786: PFC_F1r_Male_RNASeq_techrep2	RNA-Seq	cDNA	TRANSCRIPTOMIC	SINGLE	0	ILLUMINA	Illumina Genome Analyzer II	SRP002811	GEO Series accession: GSE22131	20616232	127583	SRS084864		10090	Mus musculus	Mus musculus	SRA020843	public	YES
SRR059670	2010-07-09 16:39:32	5443727	195974172	36	207		unspecified	ftp://ftp-private.ncbi.nlm.nih.gov/sra/sra-instant/reads/ByRun/sra/SRR/SRR059/SRR059670/SRR059670.sra	SRX023109	GSM563786: PFC_F1r_Male_RNASeq_techrep2	RNA-Seq	cDNA	TRANSCRIPTOMIC	SINGLE	0	ILLUMINA	Illumina Genome Analyzer II	SRP002811	GEO Series accession: GSE22131	20616232	127583	SRS084864		10090	Mus musculus	Mus musculus	SRA020843	public	YES
SRR059671	2010-07-09 16:39:32	5518051	198649836	36	210		unspecified	ftp://ftp-private.ncbi.nlm.nih.gov/sra/sra-instant/reads/ByRun/sra/SRR/SRR059/SRR059671/SRR059671.sra	SRX023109	GSM563786: PFC_F1r_Male_RNASeq_techrep2	RNA-Seq	cDNA	TRANSCRIPTOMIC	SINGLE	0	ILLUMINA	Illumina Genome Analyzer II	SRP002811	GEO Series accession: GSE22131	20616232	127583	SRS084864		10090	Mus musculus	Mus musculus	SRA020843	public	YES
SRR059672	2010-07-09 16:39:32	6007707	210269745	35	223		unspecified	ftp://ftp-private.ncbi.nlm.nih.gov/sra/sra-instant/reads/ByRun/sra/SRR/SRR059/SRR059672/SRR059672.sra	SRX023110	GSM563787: POA_F1i_Female_RNASeq_techrep2	RNA-Seq	cDNA	TRANSCRIPTOMIC	SINGLE	0	ILLUMINA	Illumina Genome Analyzer II	SRP002811	GEO Series accession: GSE22131	20616232	127583	SRS084865		10090	Mus musculus	Mus musculus	SRA020843	public	YES
SRR059673	2010-07-09 16:39:32	6648005	232680175	35	247		unspecified	ftp://ftp-private.ncbi.nlm.nih.gov/sra/sra-instant/reads/ByRun/sra/SRR/SRR059/SRR059673/SRR059673.sra	SRX023110	GSM563787: POA_F1i_Female_RNASeq_techrep2	RNA-Seq	cDNA	TRANSCRIPTOMIC	SINGLE	0	ILLUMINA	Illumina Genome Analyzer II	SRP002811	GEO Series accession: GSE22131	20616232	127583	SRS084865		10090	Mus musculus	Mus musculus	SRA020843	public	YES
SRR059674	2010-07-09 16:39:32	6673576	233575160	35	248		unspecified	ftp://ftp-private.ncbi.nlm.nih.gov/sra/sra-instant/reads/ByRun/sra/SRR/SRR059/SRR059674/SRR059674.sra	SRX023110	GSM563787: POA_F1i_Female_RNASeq_techrep2	RNA-Seq	cDNA	TRANSCRIPTOMIC	SINGLE	0	ILLUMINA	Illumina Genome Analyzer II	SRP002811	GEO Series accession: GSE22131	20616232	127583	SRS084865		10090	Mus musculus	Mus musculus	SRA020843	public	YES
SRR059675	2010-07-09 16:39:32	6769815	236943525	35	251		unspecified	ftp://ftp-private.ncbi.nlm.nih.gov/sra/sra-instant/reads/ByRun/sra/SRR/SRR059/SRR059675/SRR059675.sra	SRX023110	GSM563787: POA_F1i_Female_RNASeq_techrep2	RNA-Seq	cDNA	TRANSCRIPTOMIC	SINGLE	0	ILLUMINA	Illumina Genome Analyzer II	SRP002811	GEO Series accession: GSE22131	20616232	127583	SRS084865		10090	Mus musculus	Mus musculus	SRA020843	public	YES
SRR059676	2010-07-09 16:39:32	6531171	228590985	35	242		unspecified	ftp://ftp-private.ncbi.nlm.nih.gov/sra/sra-instant/reads/ByRun/sra/SRR/SRR059/SRR059676/SRR059676.sra	SRX023110	GSM563787: POA_F1i_Female_RNASeq_techrep2	RNA-Seq	cDNA	TRANSCRIPTOMIC	SINGLE	0	ILLUMINA	Illumina Genome Analyzer II	SRP002811	GEO Series accession: GSE22131	20616232	127583	SRS084865		10090	Mus musculus	Mus musculus	SRA020843	public	YES
SRR059677	2010-07-09 16:39:32	6421462	224751170	35	238		unspecified	ftp://ftp-private.ncbi.nlm.nih.gov/sra/sra-instant/reads/ByRun/sra/SRR/SRR059/SRR059677/SRR059677.sra	SRX023110	GSM563787: POA_F1i_Female_RNASeq_techrep2	RNA-Seq	cDNA	TRANSCRIPTOMIC	SINGLE	0	ILLUMINA	Illumina Genome Analyzer II	SRP002811	GEO Series accession: GSE22131	20616232	127583	SRS084865		10090	Mus musculus	Mus musculus	SRA020843	public	YES
SRR059678	2010-07-09 16:39:32	5781285	202344975	35	215		unspecified	ftp://ftp-private.ncbi.nlm.nih.gov/sra/sra-instant/reads/ByRun/sra/SRR/SRR059/SRR059678/SRR059678.sra	SRX023110	GSM563787: POA_F1i_Female_RNASeq_techrep2	RNA-Seq	cDNA	TRANSCRIPTOMIC	SINGLE	0	ILLUMINA	Illumina Genome Analyzer II	SRP002811	GEO Series accession: GSE22131	20616232	127583	SRS084865		10090	Mus musculus	Mus musculus	SRA020843	public	YES
SRR059679	2010-07-09 16:39:32	6324105	221343675	35	235		unspecified	ftp://ftp-private.ncbi.nlm.nih.gov/sra/sra-instant/reads/ByRun/sra/SRR/SRR059/SRR059679/SRR059679.sra	SRX023111	GSM563788: POA_F1r_Female_RNASeq_techrep2	RNA-Seq	cDNA	TRANSCRIPTOMIC	SINGLE	0	ILLUMINA	Illumina Genome Analyzer II	SRP002811	GEO Series accession: GSE22131	20616232	127583	SRS084866		10090	Mus musculus	Mus musculus	SRA020843	public	YES
SRR059680	2010-07-09 16:39:32	6913070	241957450	35	257		unspecified	ftp://ftp-private.ncbi.nlm.nih.gov/sra/sra-instant/reads/ByRun/sra/SRR/SRR059/SRR059680/SRR059680.sra	SRX023111	GSM563788: POA_F1r_Female_RNASeq_techrep2	RNA-Seq	cDNA	TRANSCRIPTOMIC	SINGLE	0	ILLUMINA	Illumina Genome Analyzer II	SRP002811	GEO Series accession: GSE22131	20616232	127583	SRS084866		10090	Mus musculus	Mus musculus	SRA020843	public	YES
SRR059681	2010-07-09 16:39:32	3498924	122462340	35	130		unspecified	ftp://ftp-private.ncbi.nlm.nih.gov/sra/sra-instant/reads/ByRun/sra/SRR/SRR059/SRR059681/SRR059681.sra	SRX023111	GSM563788: POA_F1r_Female_RNASeq_techrep2	RNA-Seq	cDNA	TRANSCRIPTOMIC	SINGLE	0	ILLUMINA	Illumina Genome Analyzer II	SRP002811	GEO Series accession: GSE22131	20616232	127583	SRS084866		10090	Mus musculus	Mus musculus	SRA020843	public	YES
SRR059682	2010-07-09 16:39:32	7158805	250558175	35	266		unspecified	ftp://ftp-private.ncbi.nlm.nih.gov/sra/sra-instant/reads/ByRun/sra/SRR/SRR059/SRR059682/SRR059682.sra	SRX023111	GSM563788: POA_F1r_Female_RNASeq_techrep2	RNA-Seq	cDNA	TRANSCRIPTOMIC	SINGLE	0	ILLUMINA	Illumina Genome Analyzer II	SRP002811	GEO Series accession: GSE22131	20616232	127583	SRS084866		10090	Mus musculus	Mus musculus	SRA020843	public	YES
SRR059683	2010-07-09 16:39:32	7116878	249090730	35	264		unspecified	ftp://ftp-private.ncbi.nlm.nih.gov/sra/sra-instant/reads/ByRun/sra/SRR/SRR059/SRR059683/SRR059683.sra	SRX023111	GSM563788: POA_F1r_Female_RNASeq_techrep2	RNA-Seq	cDNA	TRANSCRIPTOMIC	SINGLE	0	ILLUMINA	Illumina Genome Analyzer II	SRP002811	GEO Series accession: GSE22131	20616232	127583	SRS084866		10090	Mus musculus	Mus musculus	SRA020843	public	YES
SRR059684	2010-07-09 16:39:32	6957049	243496715	35	258		unspecified	ftp://ftp-private.ncbi.nlm.nih.gov/sra/sra-instant/reads/ByRun/sra/SRR/SRR059/SRR059684/SRR059684.sra	SRX023111	GSM563788: POA_F1r_Female_RNASeq_techrep2	RNA-Seq	cDNA	TRANSCRIPTOMIC	SINGLE	0	ILLUMINA	Illumina Genome Analyzer II	SRP002811	GEO Series accession: GSE22131	20616232	127583	SRS084866		10090	Mus musculus	Mus musculus	SRA020843	public	YES
SRR059685	2010-07-09 16:39:32	5794024	202790840	35	215		unspecified	ftp://ftp-private.ncbi.nlm.nih.gov/sra/sra-instant/reads/ByRun/sra/SRR/SRR059/SRR059685/SRR059685.sra	SRX023111	GSM563788: POA_F1r_Female_RNASeq_techrep2	RNA-Seq	cDNA	TRANSCRIPTOMIC	SINGLE	0	ILLUMINA	Illumina Genome Analyzer II	SRP002811	GEO Series accession: GSE22131	20616232	127583	SRS084866		10090	Mus musculus	Mus musculus	SRA020843	public	YES
SRR059686	2010-07-09 16:39:32	6138296	220978656	36	234		unspecified	ftp://ftp-private.ncbi.nlm.nih.gov/sra/sra-instant/reads/ByRun/sra/SRR/SRR059/SRR059686/SRR059686.sra	SRX023112	GSM563789: PFC_F1i_Female_RNASeq_techrep2	RNA-Seq	cDNA	TRANSCRIPTOMIC	SINGLE	0	ILLUMINA	Illumina Genome Analyzer II	SRP002811	GEO Series accession: GSE22131	20616232	127583	SRS084867		10090	Mus musculus	Mus musculus	SRA020843	public	YES
SRR059687	2010-07-09 16:39:32	6159588	221745168	36	235		unspecified	ftp://ftp-private.ncbi.nlm.nih.gov/sra/sra-instant/reads/ByRun/sra/SRR/SRR059/SRR059687/SRR059687.sra	SRX023112	GSM563789: PFC_F1i_Female_RNASeq_techrep2	RNA-Seq	cDNA	TRANSCRIPTOMIC	SINGLE	0	ILLUMINA	Illumina Genome Analyzer II	SRP002811	GEO Series accession: GSE22131	20616232	127583	SRS084867		10090	Mus musculus	Mus musculus	SRA020843	public	YES
SRR059688	2010-07-09 16:39:32	6203303	223318908	36	236		unspecified	ftp://ftp-private.ncbi.nlm.nih.gov/sra/sra-instant/reads/ByRun/sra/SRR/SRR059/SRR059688/SRR059688.sra	SRX023112	GSM563789: PFC_F1i_Female_RNASeq_techrep2	RNA-Seq	cDNA	TRANSCRIPTOMIC	SINGLE	0	ILLUMINA	Illumina Genome Analyzer II	SRP002811	GEO Series accession: GSE22131	20616232	127583	SRS084867		10090	Mus musculus	Mus musculus	SRA020843	public	YES
SRR059689	2010-07-09 16:39:32	6087776	219159936	36	232		unspecified	ftp://ftp-private.ncbi.nlm.nih.gov/sra/sra-instant/reads/ByRun/sra/SRR/SRR059/SRR059689/SRR059689.sra	SRX023112	GSM563789: PFC_F1i_Female_RNASeq_techrep2	RNA-Seq	cDNA	TRANSCRIPTOMIC	SINGLE	0	ILLUMINA	Illumina Genome Analyzer II	SRP002811	GEO Series accession: GSE22131	20616232	127583	SRS084867		10090	Mus musculus	Mus musculus	SRA020843	public	YES
SRR059690	2010-07-09 16:39:32	6224762	224091432	36	237		unspecified	ftp://ftp-private.ncbi.nlm.nih.gov/sra/sra-instant/reads/ByRun/sra/SRR/SRR059/SRR059690/SRR059690.sra	SRX023112	GSM563789: PFC_F1i_Female_RNASeq_techrep2	RNA-Seq	cDNA	TRANSCRIPTOMIC	SINGLE	0	ILLUMINA	Illumina Genome Analyzer II	SRP002811	GEO Series accession: GSE22131	20616232	127583	SRS084867		10090	Mus musculus	Mus musculus	SRA020843	public	YES
SRR059691	2010-07-09 16:39:32	6180390	222494040	36	235		unspecified	ftp://ftp-private.ncbi.nlm.nih.gov/sra/sra-instant/reads/ByRun/sra/SRR/SRR059/SRR059691/SRR059691.sra	SRX023112	GSM563789: PFC_F1i_Female_RNASeq_techrep2	RNA-Seq	cDNA	TRANSCRIPTOMIC	SINGLE	0	ILLUMINA	Illumina Genome Analyzer II	SRP002811	GEO Series accession: GSE22131	20616232	127583	SRS084867		10090	Mus musculus	Mus musculus	SRA020843	public	YES
SRR059692	2010-07-09 16:39:32	6182276	222561936	36	235		unspecified	ftp://ftp-private.ncbi.nlm.nih.gov/sra/sra-instant/reads/ByRun/sra/SRR/SRR059/SRR059692/SRR059692.sra	SRX023112	GSM563789: PFC_F1i_Female_RNASeq_techrep2	RNA-Seq	cDNA	TRANSCRIPTOMIC	SINGLE	0	ILLUMINA	Illumina Genome Analyzer II	SRP002811	GEO Series accession: GSE22131	20616232	127583	SRS084867		10090	Mus musculus	Mus musculus	SRA020843	public	YES
SRR059693	2010-07-09 16:39:32	6089697	219229092	36	232		unspecified	ftp://ftp-private.ncbi.nlm.nih.gov/sra/sra-instant/reads/ByRun/sra/SRR/SRR059/SRR059693/SRR059693.sra	SRX023112	GSM563789: PFC_F1i_Female_RNASeq_techrep2	RNA-Seq	cDNA	TRANSCRIPTOMIC	SINGLE	0	ILLUMINA	Illumina Genome Analyzer II	SRP002811	GEO Series accession: GSE22131	20616232	127583	SRS084867		10090	Mus musculus	Mus musculus	SRA020843	public	YES
SRR059694	2010-07-09 16:39:32	5454181	196350516	36	208		unspecified	ftp://ftp-private.ncbi.nlm.nih.gov/sra/sra-instant/reads/ByRun/sra/SRR/SRR059/SRR059694/SRR059694.sra	SRX023113	GSM563790: PFC_F1r_Female_RNASeq_techrep2	RNA-Seq	cDNA	TRANSCRIPTOMIC	SINGLE	0	ILLUMINA	Illumina Genome Analyzer II	SRP002811	GEO Series accession: GSE22131	20616232	127583	SRS084868		10090	Mus musculus	Mus musculus	SRA020843	public	YES
SRR059695	2010-07-09 16:39:32	5325790	191728440	36	203		unspecified	ftp://ftp-private.ncbi.nlm.nih.gov/sra/sra-instant/reads/ByRun/sra/SRR/SRR059/SRR059695/SRR059695.sra	SRX023113	GSM563790: PFC_F1r_Female_RNASeq_techrep2	RNA-Seq	cDNA	TRANSCRIPTOMIC	SINGLE	0	ILLUMINA	Illumina Genome Analyzer II	SRP002811	GEO Series accession: GSE22131	20616232	127583	SRS084868		10090	Mus musculus	Mus musculus	SRA020843	public	YES
SRR059696	2010-07-09 16:39:32	5390246	194048856	36	205		unspecified	ftp://ftp-private.ncbi.nlm.nih.gov/sra/sra-instant/reads/ByRun/sra/SRR/SRR059/SRR059696/SRR059696.sra	SRX023113	GSM563790: PFC_F1r_Female_RNASeq_techrep2	RNA-Seq	cDNA	TRANSCRIPTOMIC	SINGLE	0	ILLUMINA	Illumina Genome Analyzer II	SRP002811	GEO Series accession: GSE22131	20616232	127583	SRS084868		10090	Mus musculus	Mus musculus	SRA020843	public	YES
SRR059697	2010-07-09 16:39:32	5342748	192338928	36	203		unspecified	ftp://ftp-private.ncbi.nlm.nih.gov/sra/sra-instant/reads/ByRun/sra/SRR/SRR059/SRR059697/SRR059697.sra	SRX023113	GSM563790: PFC_F1r_Female_RNASeq_techrep2	RNA-Seq	cDNA	TRANSCRIPTOMIC	SINGLE	0	ILLUMINA	Illumina Genome Analyzer II	SRP002811	GEO Series accession: GSE22131	20616232	127583	SRS084868		10090	Mus musculus	Mus musculus	SRA020843	public	YES
SRR059698	2010-07-09 16:39:32	4263088	153471168	36	162		unspecified	ftp://ftp-private.ncbi.nlm.nih.gov/sra/sra-instant/reads/ByRun/sra/SRR/SRR059/SRR059698/SRR059698.sra	SRX023113	GSM563790: PFC_F1r_Female_RNASeq_techrep2	RNA-Seq	cDNA	TRANSCRIPTOMIC	SINGLE	0	ILLUMINA	Illumina Genome Analyzer II	SRP002811	GEO Series accession: GSE22131	20616232	127583	SRS084868		10090	Mus musculus	Mus musculus	SRA020843	public	YES
SRR059699	2010-07-09 16:39:32	4325142	155705112	36	165		unspecified	ftp://ftp-private.ncbi.nlm.nih.gov/sra/sra-instant/reads/ByRun/sra/SRR/SRR059/SRR059699/SRR059699.sra	SRX023113	GSM563790: PFC_F1r_Female_RNASeq_techrep2	RNA-Seq	cDNA	TRANSCRIPTOMIC	SINGLE	0	ILLUMINA	Illumina Genome Analyzer II	SRP002811	GEO Series accession: GSE22131	20616232	127583	SRS084868		10090	Mus musculus	Mus musculus	SRA020843	public	YES
SRR059700	2010-07-09 16:39:32	4205953	151414308	36	160		unspecified	ftp://ftp-private.ncbi.nlm.nih.gov/sra/sra-instant/reads/ByRun/sra/SRR/SRR059/SRR059700/SRR059700.sra	SRX023113	GSM563790: PFC_F1r_Female_RNASeq_techrep2	RNA-Seq	cDNA	TRANSCRIPTOMIC	SINGLE	0	ILLUMINA	Illumina Genome Analyzer II	SRP002811	GEO Series accession: GSE22131	20616232	127583	SRS084868		10090	Mus musculus	Mus musculus	SRA020843	public	YES
SRR059701	2010-07-09 16:39:32	4194986	151019496	36	160		unspecified	ftp://ftp-private.ncbi.nlm.nih.gov/sra/sra-instant/reads/ByRun/sra/SRR/SRR059/SRR059701/SRR059701.sra	SRX023113	GSM563790: PFC_F1r_Female_RNASeq_techrep2	RNA-Seq	cDNA	TRANSCRIPTOMIC	SINGLE	0	ILLUMINA	Illumina Genome Analyzer II	SRP002811	GEO Series accession: GSE22131	20616232	127583	SRS084868		10090	Mus musculus	Mus musculus	SRA020843	public	YES
SRR059702	2010-07-09 16:39:32	6824050	245665800	36	260		unspecified	ftp://ftp-private.ncbi.nlm.nih.gov/sra/sra-instant/reads/ByRun/sra/SRR/SRR059/SRR059702/SRR059702.sra	SRX023114	GSM563791: E15_F1i_RNASeq_techrep3	RNA-Seq	cDNA	TRANSCRIPTOMIC	SINGLE	0	ILLUMINA	Illumina Genome Analyzer II	SRP002811	GEO Series accession: GSE22131	20616232	127583	SRS084869		10090	Mus musculus	Mus musculus	SRA020843	public	YES
SRR059703	2010-07-09 16:39:32	7251748	261062928	36	276		unspecified	ftp://ftp-private.ncbi.nlm.nih.gov/sra/sra-instant/reads/ByRun/sra/SRR/SRR059/SRR059703/SRR059703.sra	SRX023114	GSM563791: E15_F1i_RNASeq_techrep3	RNA-Seq	cDNA	TRANSCRIPTOMIC	SINGLE	0	ILLUMINA	Illumina Genome Analyzer II	SRP002811	GEO Series accession: GSE22131	20616232	127583	SRS084869		10090	Mus musculus	Mus musculus	SRA020843	public	YES
SRR059704	2010-07-09 16:39:32	7570318	272531448	36	288		unspecified	ftp://ftp-private.ncbi.nlm.nih.gov/sra/sra-instant/reads/ByRun/sra/SRR/SRR059/SRR059704/SRR059704.sra	SRX023114	GSM563791: E15_F1i_RNASeq_techrep3	RNA-Seq	cDNA	TRANSCRIPTOMIC	SINGLE	0	ILLUMINA	Illumina Genome Analyzer II	SRP002811	GEO Series accession: GSE22131	20616232	127583	SRS084869		10090	Mus musculus	Mus musculus	SRA020843	public	YES
SRR059705	2010-07-09 16:39:32	7555353	271992708	36	288		unspecified	ftp://ftp-private.ncbi.nlm.nih.gov/sra/sra-instant/reads/ByRun/sra/SRR/SRR059/SRR059705/SRR059705.sra	SRX023114	GSM563791: E15_F1i_RNASeq_techrep3	RNA-Seq	cDNA	TRANSCRIPTOMIC	SINGLE	0	ILLUMINA	Illumina Genome Analyzer II	SRP002811	GEO Series accession: GSE22131	20616232	127583	SRS084869		10090	Mus musculus	Mus musculus	SRA020843	public	YES
SRR059706	2010-07-09 16:39:32	5908240	212696640	36	225		unspecified	ftp://ftp-private.ncbi.nlm.nih.gov/sra/sra-instant/reads/ByRun/sra/SRR/SRR059/SRR059706/SRR059706.sra	SRX023115	GSM563792: E15_F1r_RNASeq_techrep3	RNA-Seq	cDNA	TRANSCRIPTOMIC	SINGLE	0	ILLUMINA	Illumina Genome Analyzer II	SRP002811	GEO Series accession: GSE22131	20616232	127583	SRS084870		10090	Mus musculus	Mus musculus	SRA020843	public	YES
SRR059707	2010-07-09 16:39:32	6116426	220191336	36	233		unspecified	ftp://ftp-private.ncbi.nlm.nih.gov/sra/sra-instant/reads/ByRun/sra/SRR/SRR059/SRR059707/SRR059707.sra	SRX023115	GSM563792: E15_F1r_RNASeq_techrep3	RNA-Seq	cDNA	TRANSCRIPTOMIC	SINGLE	0	ILLUMINA	Illumina Genome Analyzer II	SRP002811	GEO Series accession: GSE22131	20616232	127583	SRS084870		10090	Mus musculus	Mus musculus	SRA020843	public	YES
SRR059708	2010-07-09 16:39:32	6853091	246711276	36	261		unspecified	ftp://ftp-private.ncbi.nlm.nih.gov/sra/sra-instant/reads/ByRun/sra/SRR/SRR059/SRR059708/SRR059708.sra	SRX023115	GSM563792: E15_F1r_RNASeq_techrep3	RNA-Seq	cDNA	TRANSCRIPTOMIC	SINGLE	0	ILLUMINA	Illumina Genome Analyzer II	SRP002811	GEO Series accession: GSE22131	20616232	127583	SRS084870		10090	Mus musculus	Mus musculus	SRA020843	public	YES
SRR059709	2010-07-09 16:39:32	6774077	243866772	36	258		unspecified	ftp://ftp-private.ncbi.nlm.nih.gov/sra/sra-instant/reads/ByRun/sra/SRR/SRR059/SRR059709/SRR059709.sra	SRX023115	GSM563792: E15_F1r_RNASeq_techrep3	RNA-Seq	cDNA	TRANSCRIPTOMIC	SINGLE	0	ILLUMINA	Illumina Genome Analyzer II	SRP002811	GEO Series accession: GSE22131	20616232	127583	SRS084870		10090	Mus musculus	Mus musculus	SRA020843	public	YES
SRR059710	2010-07-09 16:39:32	4991794	179704584	36	190		unspecified	ftp://ftp-private.ncbi.nlm.nih.gov/sra/sra-instant/reads/ByRun/sra/SRR/SRR059/SRR059710/SRR059710.sra	SRX023116	GSM563793: E15_F1i_RNASeq_techrep4	RNA-Seq	cDNA	TRANSCRIPTOMIC	SINGLE	0	ILLUMINA	Illumina Genome Analyzer II	SRP002811	GEO Series accession: GSE22131	20616232	127583	SRS084871		10090	Mus musculus	Mus musculus	SRA020843	public	YES
SRR059711	2010-07-09 16:39:32	6510752	234387072	36	248		unspecified	ftp://ftp-private.ncbi.nlm.nih.gov/sra/sra-instant/reads/ByRun/sra/SRR/SRR059/SRR059711/SRR059711.sra	SRX023116	GSM563793: E15_F1i_RNASeq_techrep4	RNA-Seq	cDNA	TRANSCRIPTOMIC	SINGLE	0	ILLUMINA	Illumina Genome Analyzer II	SRP002811	GEO Series accession: GSE22131	20616232	127583	SRS084871		10090	Mus musculus	Mus musculus	SRA020843	public	YES
SRR059712	2010-07-09 16:39:32	6780499	244097964	36	258		unspecified	ftp://ftp-private.ncbi.nlm.nih.gov/sra/sra-instant/reads/ByRun/sra/SRR/SRR059/SRR059712/SRR059712.sra	SRX023116	GSM563793: E15_F1i_RNASeq_techrep4	RNA-Seq	cDNA	TRANSCRIPTOMIC	SINGLE	0	ILLUMINA	Illumina Genome Analyzer II	SRP002811	GEO Series accession: GSE22131	20616232	127583	SRS084871		10090	Mus musculus	Mus musculus	SRA020843	public	YES
SRR059713	2010-07-09 16:39:32	6849736	246590496	36	261		unspecified	ftp://ftp-private.ncbi.nlm.nih.gov/sra/sra-instant/reads/ByRun/sra/SRR/SRR059/SRR059713/SRR059713.sra	SRX023116	GSM563793: E15_F1i_RNASeq_techrep4	RNA-Seq	cDNA	TRANSCRIPTOMIC	SINGLE	0	ILLUMINA	Illumina Genome Analyzer II	SRP002811	GEO Series accession: GSE22131	20616232	127583	SRS084871		10090	Mus musculus	Mus musculus	SRA020843	public	YES
SRR059714	2010-07-09 16:39:32	6823316	245639376	36	260		unspecified	ftp://ftp-private.ncbi.nlm.nih.gov/sra/sra-instant/reads/ByRun/sra/SRR/SRR059/SRR059714/SRR059714.sra	SRX023116	GSM563793: E15_F1i_RNASeq_techrep4	RNA-Seq	cDNA	TRANSCRIPTOMIC	SINGLE	0	ILLUMINA	Illumina Genome Analyzer II	SRP002811	GEO Series accession: GSE22131	20616232	127583	SRS084871		10090	Mus musculus	Mus musculus	SRA020843	public	YES
SRR059715	2010-07-09 16:39:32	6667553	240031908	36	254		unspecified	ftp://ftp-private.ncbi.nlm.nih.gov/sra/sra-instant/reads/ByRun/sra/SRR/SRR059/SRR059715/SRR059715.sra	SRX023116	GSM563793: E15_F1i_RNASeq_techrep4	RNA-Seq	cDNA	TRANSCRIPTOMIC	SINGLE	0	ILLUMINA	Illumina Genome Analyzer II	SRP002811	GEO Series accession: GSE22131	20616232	127583	SRS084871		10090	Mus musculus	Mus musculus	SRA020843	public	YES
SRR059716	2010-07-09 16:39:32	6209250	223533000	36	236		unspecified	ftp://ftp-private.ncbi.nlm.nih.gov/sra/sra-instant/reads/ByRun/sra/SRR/SRR059/SRR059716/SRR059716.sra	SRX023116	GSM563793: E15_F1i_RNASeq_techrep4	RNA-Seq	cDNA	TRANSCRIPTOMIC	SINGLE	0	ILLUMINA	Illumina Genome Analyzer II	SRP002811	GEO Series accession: GSE22131	20616232	127583	SRS084871		10090	Mus musculus	Mus musculus	SRA020843	public	YES
SRR059717	2010-07-09 16:39:32	6685160	240665760	36	255		unspecified	ftp://ftp-private.ncbi.nlm.nih.gov/sra/sra-instant/reads/ByRun/sra/SRR/SRR059/SRR059717/SRR059717.sra	SRX023117	GSM563794: E15_F1r_RNASeq_techrep4	RNA-Seq	cDNA	TRANSCRIPTOMIC	SINGLE	0	ILLUMINA	Illumina Genome Analyzer II	SRP002811	GEO Series accession: GSE22131	20616232	127583	SRS084872		10090	Mus musculus	Mus musculus	SRA020843	public	YES
SRR059718	2010-07-09 16:39:32	6840364	246253104	36	260		unspecified	ftp://ftp-private.ncbi.nlm.nih.gov/sra/sra-instant/reads/ByRun/sra/SRR/SRR059/SRR059718/SRR059718.sra	SRX023117	GSM563794: E15_F1r_RNASeq_techrep4	RNA-Seq	cDNA	TRANSCRIPTOMIC	SINGLE	0	ILLUMINA	Illumina Genome Analyzer II	SRP002811	GEO Series accession: GSE22131	20616232	127583	SRS084872		10090	Mus musculus	Mus musculus	SRA020843	public	YES
SRR059719	2010-07-09 16:39:32	6900374	248413464	36	263		unspecified	ftp://ftp-private.ncbi.nlm.nih.gov/sra/sra-instant/reads/ByRun/sra/SRR/SRR059/SRR059719/SRR059719.sra	SRX023117	GSM563794: E15_F1r_RNASeq_techrep4	RNA-Seq	cDNA	TRANSCRIPTOMIC	SINGLE	0	ILLUMINA	Illumina Genome Analyzer II	SRP002811	GEO Series accession: GSE22131	20616232	127583	SRS084872		10090	Mus musculus	Mus musculus	SRA020843	public	YES
SRR059720	2010-07-09 16:39:32	7128617	256630212	36	271		unspecified	ftp://ftp-private.ncbi.nlm.nih.gov/sra/sra-instant/reads/ByRun/sra/SRR/SRR059/SRR059720/SRR059720.sra	SRX023117	GSM563794: E15_F1r_RNASeq_techrep4	RNA-Seq	cDNA	TRANSCRIPTOMIC	SINGLE	0	ILLUMINA	Illumina Genome Analyzer II	SRP002811	GEO Series accession: GSE22131	20616232	127583	SRS084872		10090	Mus musculus	Mus musculus	SRA020843	public	YES
SRR059721	2010-07-09 16:39:32	7166343	257988348	36	273		unspecified	ftp://ftp-private.ncbi.nlm.nih.gov/sra/sra-instant/reads/ByRun/sra/SRR/SRR059/SRR059721/SRR059721.sra	SRX023117	GSM563794: E15_F1r_RNASeq_techrep4	RNA-Seq	cDNA	TRANSCRIPTOMIC	SINGLE	0	ILLUMINA	Illumina Genome Analyzer II	SRP002811	GEO Series accession: GSE22131	20616232	127583	SRS084872		10090	Mus musculus	Mus musculus	SRA020843	public	YES
SRR059722	2010-07-09 16:39:32	7157074	257654664	36	273		unspecified	ftp://ftp-private.ncbi.nlm.nih.gov/sra/sra-instant/reads/ByRun/sra/SRR/SRR059/SRR059722/SRR059722.sra	SRX023117	GSM563794: E15_F1r_RNASeq_techrep4	RNA-Seq	cDNA	TRANSCRIPTOMIC	SINGLE	0	ILLUMINA	Illumina Genome Analyzer II	SRP002811	GEO Series accession: GSE22131	20616232	127583	SRS084872		10090	Mus musculus	Mus musculus	SRA020843	public	YES
SRR059723	2010-07-09 16:39:32	6800812	244829232	36	259		unspecified	ftp://ftp-private.ncbi.nlm.nih.gov/sra/sra-instant/reads/ByRun/sra/SRR/SRR059/SRR059723/SRR059723.sra	SRX023117	GSM563794: E15_F1r_RNASeq_techrep4	RNA-Seq	cDNA	TRANSCRIPTOMIC	SINGLE	0	ILLUMINA	Illumina Genome Analyzer II	SRP002811	GEO Series accession: GSE22131	20616232	127583	SRS084872		10090	Mus musculus	Mus musculus	SRA020843	public	YES
SRR210850	2011-09-12 16:49:00	26098664	939551904	36	603		unspecified	ftp://ftp-private.ncbi.nlm.nih.gov/sra/sra-instant/reads/ByRun/sra/SRR/SRR210/SRR210850/SRR210850.sra	SRX063935	GSM727007: POLYA_DP_RNAseq	RNA-Seq	cDNA	TRANSCRIPTOMIC	SINGLE	0	ILLUMINA	Illumina Genome Analyzer	SRP006816	GEO Series accession: GSE29362	21765417	140193	SRS193358		10090	Mus musculus	Mus musculus	SRA036915	public	NO
SRR210851	2011-09-12 16:49:00	25543851	919578636	36	564		unspecified	ftp://ftp-private.ncbi.nlm.nih.gov/sra/sra-instant/reads/ByRun/sra/SRR/SRR210/SRR210851/SRR210851.sra	SRX063935	GSM727007: POLYA_DP_RNAseq	RNA-Seq	cDNA	TRANSCRIPTOMIC	SINGLE	0	ILLUMINA	Illumina Genome Analyzer	SRP006816	GEO Series accession: GSE29362	21765417	140193	SRS193358		10090	Mus musculus	Mus musculus	SRA036915	public	NO
SRR210852	2011-09-12 16:49:00	26220394	943934184	36	590		unspecified	ftp://ftp-private.ncbi.nlm.nih.gov/sra/sra-instant/reads/ByRun/sra/SRR/SRR210/SRR210852/SRR210852.sra	SRX063935	GSM727007: POLYA_DP_RNAseq	RNA-Seq	cDNA	TRANSCRIPTOMIC	SINGLE	0	ILLUMINA	Illumina Genome Analyzer	SRP006816	GEO Series accession: GSE29362	21765417	140193	SRS193358		10090	Mus musculus	Mus musculus	SRA036915	public	NO
SRR210853	2011-09-12 16:49:00	26080836	938910096	36	599		unspecified	ftp://ftp-private.ncbi.nlm.nih.gov/sra/sra-instant/reads/ByRun/sra/SRR/SRR210/SRR210853/SRR210853.sra	SRX063935	GSM727007: POLYA_DP_RNAseq	RNA-Seq	cDNA	TRANSCRIPTOMIC	SINGLE	0	ILLUMINA	Illumina Genome Analyzer	SRP006816	GEO Series accession: GSE29362	21765417	140193	SRS193358		10090	Mus musculus	Mus musculus	SRA036915	public	NO
SRR210854	2011-09-12 16:49:00	25210835	907590060	36	596		unspecified	ftp://ftp-private.ncbi.nlm.nih.gov/sra/sra-instant/reads/ByRun/sra/SRR/SRR210/SRR210854/SRR210854.sra	SRX063935	GSM727007: POLYA_DP_RNAseq	RNA-Seq	cDNA	TRANSCRIPTOMIC	SINGLE	0	ILLUMINA	Illumina Genome Analyzer	SRP006816	GEO Series accession: GSE29362	21765417	140193	SRS193358		10090	Mus musculus	Mus musculus	SRA036915	public	NO
SRR210855	2011-05-24 10:09:41	15517740	1582809480	102	1127		unspecified	ftp://ftp-private.ncbi.nlm.nih.gov/sra/sra-instant/reads/ByRun/sra/SRR/SRR210/SRR210855/SRR210855.sra	SRX063936	GSM727423: TT2_WT_mRNA-seq	RNA-Seq	cDNA	TRANSCRIPTOMIC	SINGLE	0	ILLUMINA	Illumina Genome Analyzer II	SRP006817	GEO Series accession: GSE29413	21624812	141551	SRS193557		10090	Mus musculus	Mus musculus	SRA036916	public	NO
SRR210856	2011-05-24 10:09:41	15336035	1564275570	102	1120		unspecified	ftp://ftp-private.ncbi.nlm.nih.gov/sra/sra-instant/reads/ByRun/sra/SRR/SRR210/SRR210856/SRR210856.sra	SRX063937	GSM727424: TT2_SETDB1_KO_mRNA-seq	RNA-Seq	cDNA	TRANSCRIPTOMIC	SINGLE	0	ILLUMINA	Illumina Genome Analyzer II	SRP006817	GEO Series accession: GSE29413	21624812	141551	SRS193558		10090	Mus musculus	Mus musculus	SRA036916	public	NO
SRR599648	2012-10-21 10:09:10	43040267	6843402453	159	3022			ftp://ftp-private.ncbi.nlm.nih.gov/sra/sra-instant/reads/ByRun/sra/SRR/SRR599/SRR599648/SRR599648.sra	SRX063940	GSM727427: J1_WT_mRNA-seq	RNA-Seq	cDNA	TRANSCRIPTOMIC	PAIRED	0	ILLUMINA	Illumina Genome Analyzer II	SRP006817	GEO Series accession: GSE29413	21624812	141551	SRS193561		10090	Mus musculus	Mus musculus	SRA036916	public	NO
SRR210862	2011-05-24 10:09:41	42070129	6689150511	159	3144		unspecified	ftp://ftp-private.ncbi.nlm.nih.gov/sra/sra-instant/reads/ByRun/sra/SRR/SRR210/SRR210862/SRR210862.sra	SRX063941	GSM727428: J1_DMNT_TKO_mRNA-seq	RNA-Seq	cDNA	TRANSCRIPTOMIC	SINGLE	0	ILLUMINA	Illumina Genome Analyzer II	SRP006817	GEO Series accession: GSE29413	21624812	141551	SRS193562		10090	Mus musculus	Mus musculus	SRA036916	public	NO
SRR212430	2011-10-18 15:07:20	21073342	3034561248	144	2102		unspecified	ftp://ftp-private.ncbi.nlm.nih.gov/sra/sra-instant/reads/ByRun/sra/SRR/SRR212/SRR212430/SRR212430.sra	SRX064476	GSM728908: HY_RNA-Seq	RNA-Seq	cDNA	TRANSCRIPTOMIC	PAIRED	200	ILLUMINA	Illumina Genome Analyzer II	SRP006832	GEO Series accession: GSE29446	22034492	141559	SRS208837		10090	Mus musculus	Mus musculus	SRA037038	public	YES
SRR212431	2011-10-18 15:07:20	20785943	2993175792	144	2106		unspecified	ftp://ftp-private.ncbi.nlm.nih.gov/sra/sra-instant/reads/ByRun/sra/SRR/SRR212/SRR212431/SRR212431.sra	SRX064476	GSM728908: HY_RNA-Seq	RNA-Seq	cDNA	TRANSCRIPTOMIC	PAIRED	200	ILLUMINA	Illumina Genome Analyzer II	SRP006832	GEO Series accession: GSE29446	22034492	141559	SRS208837		10090	Mus musculus	Mus musculus	SRA037038	public	YES
SRR212432	2011-10-18 15:07:20	20554807	2959892208	144	1994		unspecified	ftp://ftp-private.ncbi.nlm.nih.gov/sra/sra-instant/reads/ByRun/sra/SRR/SRR212/SRR212432/SRR212432.sra	SRX064477	GSM728909: SHAM-HY_RNA-Seq	RNA-Seq	cDNA	TRANSCRIPTOMIC	PAIRED	200	ILLUMINA	Illumina Genome Analyzer II	SRP006832	GEO Series accession: GSE29446	22034492	141559	SRS208838		10090	Mus musculus	Mus musculus	SRA037038	public	YES
SRR212433	2011-10-18 15:07:20	20949783	3016768752	144	2083		unspecified	ftp://ftp-private.ncbi.nlm.nih.gov/sra/sra-instant/reads/ByRun/sra/SRR/SRR212/SRR212433/SRR212433.sra	SRX064477	GSM728909: SHAM-HY_RNA-Seq	RNA-Seq	cDNA	TRANSCRIPTOMIC	PAIRED	200	ILLUMINA	Illumina Genome Analyzer II	SRP006832	GEO Series accession: GSE29446	22034492	141559	SRS208838		10090	Mus musculus	Mus musculus	SRA037038	public	YES
SRR212434	2011-10-18 15:07:20	18749211	2849880072	152	1923		unspecified	ftp://ftp-private.ncbi.nlm.nih.gov/sra/sra-instant/reads/ByRun/sra/SRR/SRR212/SRR212434/SRR212434.sra	SRX064478	GSM728910: HF_RNA-Seq	RNA-Seq	cDNA	TRANSCRIPTOMIC	PAIRED	200	ILLUMINA	Illumina Genome Analyzer II	SRP006832	GEO Series accession: GSE29446	22034492	141559	SRS208839		10090	Mus musculus	Mus musculus	SRA037038	public	YES
SRR212435	2011-10-18 15:07:20	16179984	2459357568	152	1705		unspecified	ftp://ftp-private.ncbi.nlm.nih.gov/sra/sra-instant/reads/ByRun/sra/SRR/SRR212/SRR212435/SRR212435.sra	SRX064478	GSM728910: HF_RNA-Seq	RNA-Seq	cDNA	TRANSCRIPTOMIC	PAIRED	200	ILLUMINA	Illumina Genome Analyzer II	SRP006832	GEO Series accession: GSE29446	22034492	141559	SRS208839		10090	Mus musculus	Mus musculus	SRA037038	public	YES
SRR212436	2011-10-18 15:07:20	16347946	2484887792	152	1630		unspecified	ftp://ftp-private.ncbi.nlm.nih.gov/sra/sra-instant/reads/ByRun/sra/SRR/SRR212/SRR212436/SRR212436.sra	SRX064478	GSM728910: HF_RNA-Seq	RNA-Seq	cDNA	TRANSCRIPTOMIC	PAIRED	200	ILLUMINA	Illumina Genome Analyzer II	SRP006832	GEO Series accession: GSE29446	22034492	141559	SRS208839		10090	Mus musculus	Mus musculus	SRA037038	public	YES
SRR212437	2011-10-18 15:07:20	14176412	2154814624	152	1426		unspecified	ftp://ftp-private.ncbi.nlm.nih.gov/sra/sra-instant/reads/ByRun/sra/SRR/SRR212/SRR212437/SRR212437.sra	SRX064479	GSM728911: SHAM-HF_RNA-Seq	RNA-Seq	cDNA	TRANSCRIPTOMIC	PAIRED	200	ILLUMINA	Illumina Genome Analyzer II	SRP006832	GEO Series accession: GSE29446	22034492	141559	SRS208840		10090	Mus musculus	Mus musculus	SRA037038	public	YES
SRR212438	2011-10-18 15:07:20	10353215	1573688680	152	1025		unspecified	ftp://ftp-private.ncbi.nlm.nih.gov/sra/sra-instant/reads/ByRun/sra/SRR/SRR212/SRR212438/SRR212438.sra	SRX064479	GSM728911: SHAM-HF_RNA-Seq	RNA-Seq	cDNA	TRANSCRIPTOMIC	PAIRED	200	ILLUMINA	Illumina Genome Analyzer II	SRP006832	GEO Series accession: GSE29446	22034492	141559	SRS208840		10090	Mus musculus	Mus musculus	SRA037038	public	YES
SRR212439	2011-10-18 15:07:20	10392572	1579670944	152	1032		unspecified	ftp://ftp-private.ncbi.nlm.nih.gov/sra/sra-instant/reads/ByRun/sra/SRR/SRR212/SRR212439/SRR212439.sra	SRX064479	GSM728911: SHAM-HF_RNA-Seq	RNA-Seq	cDNA	TRANSCRIPTOMIC	PAIRED	200	ILLUMINA	Illumina Genome Analyzer II	SRP006832	GEO Series accession: GSE29446	22034492	141559	SRS208840		10090	Mus musculus	Mus musculus	SRA037038	public	YES
SRR306757	2011-10-14 12:16:40	25094445	1907177820	76	1443		unspecified	ftp://ftp-private.ncbi.nlm.nih.gov/sra/sra-instant/reads/ByRun/sra/SRR/SRR306/SRR306757/SRR306757.sra	SRX081905	GSM752614: mmu br F 1	RNA-Seq	cDNA	TRANSCRIPTOMIC	SINGLE	0	ILLUMINA	Illumina Genome Analyzer IIx	SRP007412	GEO Series accession: GSE30352	22012392	143627	SRS213997		10090		Mus musculus	SRA039810	public	YES
SRR306758	2011-10-14 12:16:40	18882745	1435088620	76	1030		unspecified	ftp://ftp-private.ncbi.nlm.nih.gov/sra/sra-instant/reads/ByRun/sra/SRR/SRR306/SRR306758/SRR306758.sra	SRX081906	GSM752615: mmu br M 1	RNA-Seq	cDNA	TRANSCRIPTOMIC	SINGLE	0	ILLUMINA	Illumina Genome Analyzer IIx	SRP007412	GEO Series accession: GSE30352	22012392	143627	SRS213998		10090		Mus musculus	SRA039810	public	YES
SRR306759	2011-10-14 12:16:40	20757817	1577594092	76	1150		unspecified	ftp://ftp-private.ncbi.nlm.nih.gov/sra/sra-instant/reads/ByRun/sra/SRR/SRR306/SRR306759/SRR306759.sra	SRX081906	GSM752615: mmu br M 1	RNA-Seq	cDNA	TRANSCRIPTOMIC	SINGLE	0	ILLUMINA	Illumina Genome Analyzer IIx	SRP007412	GEO Series accession: GSE30352	22012392	143627	SRS213998		10090		Mus musculus	SRA039810	public	YES
SRR306760	2011-10-14 12:16:40	17770683	1350571908	76	981		unspecified	ftp://ftp-private.ncbi.nlm.nih.gov/sra/sra-instant/reads/ByRun/sra/SRR/SRR306/SRR306760/SRR306760.sra	SRX081906	GSM752615: mmu br M 1	RNA-Seq	cDNA	TRANSCRIPTOMIC	SINGLE	0	ILLUMINA	Illumina Genome Analyzer IIx	SRP007412	GEO Series accession: GSE30352	22012392	143627	SRS213998		10090		Mus musculus	SRA039810	public	YES
SRR306761	2011-10-14 12:16:40	18759557	1425726332	76	1046		unspecified	ftp://ftp-private.ncbi.nlm.nih.gov/sra/sra-instant/reads/ByRun/sra/SRR/SRR306/SRR306761/SRR306761.sra	SRX081906	GSM752615: mmu br M 1	RNA-Seq	cDNA	TRANSCRIPTOMIC	SINGLE	0	ILLUMINA	Illumina Genome Analyzer IIx	SRP007412	GEO Series accession: GSE30352	22012392	143627	SRS213998		10090		Mus musculus	SRA039810	public	YES
SRR306762	2011-10-14 12:16:40	19726026	1499177976	76	1133		unspecified	ftp://ftp-private.ncbi.nlm.nih.gov/sra/sra-instant/reads/ByRun/sra/SRR/SRR306/SRR306762/SRR306762.sra	SRX081907	GSM752616: mmu br M 2	RNA-Seq	cDNA	TRANSCRIPTOMIC	SINGLE	0	ILLUMINA	Illumina Genome Analyzer IIx	SRP007412	GEO Series accession: GSE30352	22012392	143627	SRS213999		10090		Mus musculus	SRA039810	public	YES
SRR306763	2011-10-14 12:16:40	41340785	3141899660	76	2289		unspecified	ftp://ftp-private.ncbi.nlm.nih.gov/sra/sra-instant/reads/ByRun/sra/SRR/SRR306/SRR306763/SRR306763.sra	SRX081908	GSM752617: mmu cb F 1	RNA-Seq	cDNA	TRANSCRIPTOMIC	SINGLE	0	ILLUMINA	Illumina Genome Analyzer IIx	SRP007412	GEO Series accession: GSE30352	22012392	143627	SRS214000		10090		Mus musculus	SRA039810	public	YES
SRR306764	2011-10-14 12:16:40	20947739	1592028164	76	1205		unspecified	ftp://ftp-private.ncbi.nlm.nih.gov/sra/sra-instant/reads/ByRun/sra/SRR/SRR306/SRR306764/SRR306764.sra	SRX081909	GSM752618: mmu cb M 1	RNA-Seq	cDNA	TRANSCRIPTOMIC	SINGLE	0	ILLUMINA	Illumina Genome Analyzer IIx	SRP007412	GEO Series accession: GSE30352	22012392	143627	SRS214001		10090		Mus musculus	SRA039810	public	YES
SRR306765	2011-10-14 12:16:40	28710250	2181979000	76	1628		unspecified	ftp://ftp-private.ncbi.nlm.nih.gov/sra/sra-instant/reads/ByRun/sra/SRR/SRR306/SRR306765/SRR306765.sra	SRX081910	GSM752619: mmu cb M 2	RNA-Seq	cDNA	TRANSCRIPTOMIC	SINGLE	0	ILLUMINA	Illumina Genome Analyzer IIx	SRP007412	GEO Series accession: GSE30352	22012392	143627	SRS214002		10090		Mus musculus	SRA039810	public	YES
SRR306766	2011-10-14 12:16:40	44668984	3394842784	76	2498		unspecified	ftp://ftp-private.ncbi.nlm.nih.gov/sra/sra-instant/reads/ByRun/sra/SRR/SRR306/SRR306766/SRR306766.sra	SRX081911	GSM752620: mmu ht F 1	RNA-Seq	cDNA	TRANSCRIPTOMIC	SINGLE	0	ILLUMINA	Illumina Genome Analyzer IIx	SRP007412	GEO Series accession: GSE30352	22012392	143627	SRS214003		10090		Mus musculus	SRA039810	public	YES
SRR306767	2011-10-14 12:16:40	24493681	1861519756	76	1359		unspecified	ftp://ftp-private.ncbi.nlm.nih.gov/sra/sra-instant/reads/ByRun/sra/SRR/SRR306/SRR306767/SRR306767.sra	SRX081912	GSM752621: mmu ht M 1	RNA-Seq	cDNA	TRANSCRIPTOMIC	SINGLE	0	ILLUMINA	Illumina Genome Analyzer IIx	SRP007412	GEO Series accession: GSE30352	22012392	143627	SRS214004		10090		Mus musculus	SRA039810	public	YES
SRR306768	2011-10-14 12:16:40	25903961	1968701036	76	1463		unspecified	ftp://ftp-private.ncbi.nlm.nih.gov/sra/sra-instant/reads/ByRun/sra/SRR/SRR306/SRR306768/SRR306768.sra	SRX081913	GSM752622: mmu ht M 2	RNA-Seq	cDNA	TRANSCRIPTOMIC	SINGLE	0	ILLUMINA	Illumina Genome Analyzer IIx	SRP007412	GEO Series accession: GSE30352	22012392	143627	SRS214005		10090		Mus musculus	SRA039810	public	YES
SRR306769	2011-10-14 12:16:40	45613332	3466613232	76	2621		unspecified	ftp://ftp-private.ncbi.nlm.nih.gov/sra/sra-instant/reads/ByRun/sra/SRR/SRR306/SRR306769/SRR306769.sra	SRX081914	GSM752623: mmu kd F 1	RNA-Seq	cDNA	TRANSCRIPTOMIC	SINGLE	0	ILLUMINA	Illumina Genome Analyzer IIx	SRP007412	GEO Series accession: GSE30352	22012392	143627	SRS214006		10090		Mus musculus	SRA039810	public	YES
SRR306770	2011-10-14 12:16:40	23639764	1796622064	76	1343		unspecified	ftp://ftp-private.ncbi.nlm.nih.gov/sra/sra-instant/reads/ByRun/sra/SRR/SRR306/SRR306770/SRR306770.sra	SRX081915	GSM752624: mmu kd M 1	RNA-Seq	cDNA	TRANSCRIPTOMIC	SINGLE	0	ILLUMINA	Illumina Genome Analyzer IIx	SRP007412	GEO Series accession: GSE30352	22012392	143627	SRS214007		10090		Mus musculus	SRA039810	public	YES
SRR306771	2011-10-14 12:16:40	29158234	2216025784	76	1658		unspecified	ftp://ftp-private.ncbi.nlm.nih.gov/sra/sra-instant/reads/ByRun/sra/SRR/SRR306/SRR306771/SRR306771.sra	SRX081916	GSM752625: mmu kd M 2	RNA-Seq	cDNA	TRANSCRIPTOMIC	SINGLE	0	ILLUMINA	Illumina Genome Analyzer IIx	SRP007412	GEO Series accession: GSE30352	22012392	143627	SRS214008		10090		Mus musculus	SRA039810	public	YES
SRR306772	2011-10-14 12:16:40	48306727	3671311252	76	2717		unspecified	ftp://ftp-private.ncbi.nlm.nih.gov/sra/sra-instant/reads/ByRun/sra/SRR/SRR306/SRR306772/SRR306772.sra	SRX081917	GSM752626: mmu lv F 1	RNA-Seq	cDNA	TRANSCRIPTOMIC	SINGLE	0	ILLUMINA	Illumina Genome Analyzer IIx	SRP007412	GEO Series accession: GSE30352	22012392	143627	SRS214009		10090		Mus musculus	SRA039810	public	YES
SRR306773	2011-10-14 12:16:40	18444416	1401775616	76	1065		unspecified	ftp://ftp-private.ncbi.nlm.nih.gov/sra/sra-instant/reads/ByRun/sra/SRR/SRR306/SRR306773/SRR306773.sra	SRX081918	GSM752627: mmu lv M 1	RNA-Seq	cDNA	TRANSCRIPTOMIC	SINGLE	0	ILLUMINA	Illumina Genome Analyzer IIx	SRP007412	GEO Series accession: GSE30352	22012392	143627	SRS214010		10090		Mus musculus	SRA039810	public	YES
SRR306774	2011-10-14 12:16:40	34010208	2584775808	76	1933		unspecified	ftp://ftp-private.ncbi.nlm.nih.gov/sra/sra-instant/reads/ByRun/sra/SRR/SRR306/SRR306774/SRR306774.sra	SRX081919	GSM752628: mmu lv M 2	RNA-Seq	cDNA	TRANSCRIPTOMIC	SINGLE	0	ILLUMINA	Illumina Genome Analyzer IIx	SRP007412	GEO Series accession: GSE30352	22012392	143627	SRS214011		10090		Mus musculus	SRA039810	public	YES
SRR306775	2011-10-14 12:16:40	19973708	1518001808	76	1154		unspecified	ftp://ftp-private.ncbi.nlm.nih.gov/sra/sra-instant/reads/ByRun/sra/SRR/SRR306/SRR306775/SRR306775.sra	SRX081920	GSM752629: mmu ts M 1	RNA-Seq	cDNA	TRANSCRIPTOMIC	SINGLE	0	ILLUMINA	Illumina Genome Analyzer IIx	SRP007412	GEO Series accession: GSE30352	22012392	143627	SRS214012		10090		Mus musculus	SRA039810	public	YES
SRR306776	2011-10-14 12:16:40	29762970	2261985720	76	1705		unspecified	ftp://ftp-private.ncbi.nlm.nih.gov/sra/sra-instant/reads/ByRun/sra/SRR/SRR306/SRR306776/SRR306776.sra	SRX081921	GSM752630: mmu ts M 2	RNA-Seq	cDNA	TRANSCRIPTOMIC	SINGLE	0	ILLUMINA	Illumina Genome Analyzer IIx	SRP007412	GEO Series accession: GSE30352	22012392	143627	SRS214013		10090		Mus musculus	SRA039810	public	YES
SRR330963	2012-03-14 10:20:58	38499292	1385974512	36	798		unspecified	ftp://ftp-private.ncbi.nlm.nih.gov/sra/sra-instant/reads/ByRun/sra/SRR/SRR330/SRR330963/SRR330963.sra	SRX091801	GSM778487: ES_RNA_a	RNA-Seq	cDNA	TRANSCRIPTOMIC	SINGLE	0	ILLUMINA	Illumina Genome Analyzer II	SRP007827	GEO Series accession: GSE31385	0	145913	SRS257383		10090		Mus musculus	SRA044991	public	YES
SRR330964	2012-03-14 10:20:53	26014486	936521496	36	572		unspecified	ftp://ftp-private.ncbi.nlm.nih.gov/sra/sra-instant/reads/ByRun/sra/SRR/SRR330/SRR330964/SRR330964.sra	SRX091802	GSM778488: ES_RNA_b	RNA-Seq	cDNA	TRANSCRIPTOMIC	SINGLE	0	ILLUMINA	Illumina Genome Analyzer II	SRP007827	GEO Series accession: GSE31385	0	145913	SRS257384		10090		Mus musculus	SRA044991	public	YES
SRR330965	2012-03-14 10:20:49	33771783	1215784188	36	723		unspecified	ftp://ftp-private.ncbi.nlm.nih.gov/sra/sra-instant/reads/ByRun/sra/SRR/SRR330/SRR330965/SRR330965.sra	SRX091803	GSM778489: NP_RNA_a	RNA-Seq	cDNA	TRANSCRIPTOMIC	SINGLE	0	ILLUMINA	Illumina Genome Analyzer II	SRP007827	GEO Series accession: GSE31385	0	145913	SRS257385		10090		Mus musculus	SRA044991	public	YES
SRR330966	2012-03-14 10:20:32	23684618	852646248	36	565		unspecified	ftp://ftp-private.ncbi.nlm.nih.gov/sra/sra-instant/reads/ByRun/sra/SRR/SRR330/SRR330966/SRR330966.sra	SRX091804	GSM778490: NP_RNA_b	RNA-Seq	cDNA	TRANSCRIPTOMIC	SINGLE	0	ILLUMINA	Illumina Genome Analyzer II	SRP007827	GEO Series accession: GSE31385	0	145913	SRS257386		10090		Mus musculus	SRA044991	public	YES
SRR387732	2011-12-05 15:54:24	29715464	1069756704	36	634		unspecified	ftp://ftp-private.ncbi.nlm.nih.gov/sra/sra-instant/reads/ByRun/sra/SRR/SRR387/SRR387732/SRR387732.sra	SRX110336	GSM840626: pancreas_LRHt-/-_pool1	RNA-Seq	other	TRANSCRIPTOMIC	SINGLE	0	ILLUMINA	Illumina Genome Analyzer	SRP009598	GEO Series accession: GSE34030	0	156441	SRS281654		10090		Mus musculus	SRA048473	public	YES
SRR387733	2011-12-05 15:53:22	30233159	1088393724	36	622		unspecified	ftp://ftp-private.ncbi.nlm.nih.gov/sra/sra-instant/reads/ByRun/sra/SRR/SRR387/SRR387733/SRR387733.sra	SRX110337	GSM840627: pancreas_LRHt-/-_pool2	RNA-Seq	other	TRANSCRIPTOMIC	SINGLE	0	ILLUMINA	Illumina Genome Analyzer	SRP009598	GEO Series accession: GSE34030	0	156441	SRS281655		10090		Mus musculus	SRA048473	public	YES
SRR387734	2011-12-05 15:58:24	31366345	1129188420	36	654		unspecified	ftp://ftp-private.ncbi.nlm.nih.gov/sra/sra-instant/reads/ByRun/sra/SRR/SRR387/SRR387734/SRR387734.sra	SRX110338	GSM840628: pancreas_flox_pool1	RNA-Seq	other	TRANSCRIPTOMIC	SINGLE	0	ILLUMINA	Illumina Genome Analyzer	SRP009598	GEO Series accession: GSE34030	0	156441	SRS281656		10090		Mus musculus	SRA048473	public	YES
SRR387735	2011-12-05 15:57:24	31439403	1131818508	36	664		unspecified	ftp://ftp-private.ncbi.nlm.nih.gov/sra/sra-instant/reads/ByRun/sra/SRR/SRR387/SRR387735/SRR387735.sra	SRX110339	GSM840629: pancreas_flox_pool2	RNA-Seq	other	TRANSCRIPTOMIC	SINGLE	0	ILLUMINA	Illumina Genome Analyzer	SRP009598	GEO Series accession: GSE34030	0	156441	SRS281657		10090		Mus musculus	SRA048473	public	YES
SRR042273	2010-07-09 16:41:27	4886341	175908276	36	186		unspecified	ftp://ftp-private.ncbi.nlm.nih.gov/sra/sra-instant/reads/ByRun/sra/SRR/SRR042/SRR042273/SRR042273.sra	SRX019943	GSM538832: CAGE_T0-1	RNA-Seq	CAGE	TRANSCRIPTOMIC	SINGLE	0	ILLUMINA	Illumina Genome Analyzer II	SRP002400	GEO Series accession: GSE21580	20615900	127015	SRS066170		10090	Mus musculus	Mus musculus	SRA012663	public	NO
SRR042274	2010-07-09 16:41:27	3933233	125863456	32	135		unspecified	ftp://ftp-private.ncbi.nlm.nih.gov/sra/sra-instant/reads/ByRun/sra/SRR/SRR042/SRR042274/SRR042274.sra	SRX019944	GSM538833: CAGE_T0-1_duplo	RNA-Seq	CAGE	TRANSCRIPTOMIC	SINGLE	0	ILLUMINA	Illumina Genome Analyzer II	SRP002400	GEO Series accession: GSE21580	20615900	127015	SRS066171		10090	Mus musculus	Mus musculus	SRA012663	public	NO
SRR042275	2010-07-09 16:41:27	5003964	180142704	36	190		unspecified	ftp://ftp-private.ncbi.nlm.nih.gov/sra/sra-instant/reads/ByRun/sra/SRR/SRR042/SRR042275/SRR042275.sra	SRX019945	GSM538834: CAGE_T0-2	RNA-Seq	CAGE	TRANSCRIPTOMIC	SINGLE	0	ILLUMINA	Illumina Genome Analyzer II	SRP002400	GEO Series accession: GSE21580	20615900	127015	SRS066172		10090	Mus musculus	Mus musculus	SRA012663	public	NO
SRR042276	2010-07-09 16:41:27	4734605	170445780	36	180		unspecified	ftp://ftp-private.ncbi.nlm.nih.gov/sra/sra-instant/reads/ByRun/sra/SRR/SRR042/SRR042276/SRR042276.sra	SRX019946	GSM538835: CAGE_T0-3	RNA-Seq	CAGE	TRANSCRIPTOMIC	SINGLE	0	ILLUMINA	Illumina Genome Analyzer II	SRP002400	GEO Series accession: GSE21580	20615900	127015	SRS066173		10090	Mus musculus	Mus musculus	SRA012663	public	NO
SRR042277	2010-07-09 16:41:27	4525321	162911556	36	172		unspecified	ftp://ftp-private.ncbi.nlm.nih.gov/sra/sra-instant/reads/ByRun/sra/SRR/SRR042/SRR042277/SRR042277.sra	SRX019947	GSM538836: CAGE_T9-1	RNA-Seq	CAGE	TRANSCRIPTOMIC	SINGLE	0	ILLUMINA	Illumina Genome Analyzer II	SRP002400	GEO Series accession: GSE21580	20615900	127015	SRS066174		10090	Mus musculus	Mus musculus	SRA012663	public	NO
SRR042278	2010-07-09 16:41:27	3101153	99236896	32	106		unspecified	ftp://ftp-private.ncbi.nlm.nih.gov/sra/sra-instant/reads/ByRun/sra/SRR/SRR042/SRR042278/SRR042278.sra	SRX019948	GSM538837: CAGE_T9-1_duplo	RNA-Seq	CAGE	TRANSCRIPTOMIC	SINGLE	0	ILLUMINA	Illumina Genome Analyzer II	SRP002400	GEO Series accession: GSE21580	20615900	127015	SRS066175		10090	Mus musculus	Mus musculus	SRA012663	public	NO
SRR042279	2010-07-09 16:41:27	5060041	182161476	36	193		unspecified	ftp://ftp-private.ncbi.nlm.nih.gov/sra/sra-instant/reads/ByRun/sra/SRR/SRR042/SRR042279/SRR042279.sra	SRX019949	GSM538838: CAGE_T9-2	RNA-Seq	CAGE	TRANSCRIPTOMIC	SINGLE	0	ILLUMINA	Illumina Genome Analyzer II	SRP002400	GEO Series accession: GSE21580	20615900	127015	SRS066176		10090	Mus musculus	Mus musculus	SRA012663	public	NO
SRR042280	2010-07-09 16:41:27	4830194	173886984	36	184		unspecified	ftp://ftp-private.ncbi.nlm.nih.gov/sra/sra-instant/reads/ByRun/sra/SRR/SRR042/SRR042280/SRR042280.sra	SRX019950	GSM538839: CAGE_T9-3	RNA-Seq	CAGE	TRANSCRIPTOMIC	SINGLE	0	ILLUMINA	Illumina Genome Analyzer II	SRP002400	GEO Series accession: GSE21580	20615900	127015	SRS066177		10090	Mus musculus	Mus musculus	SRA012663	public	NO
SRR185888	2011-04-21 12:05:07	23258101	1767615676	76	1086		unspecified	ftp://ftp-private.ncbi.nlm.nih.gov/sra/sra-instant/reads/ByRun/sra/SRR/SRR185/SRR185888/SRR185888.sra	SRX057751	GSM706681: mES_RNA_Seq_shRNA2863	RNA-Seq	cDNA	TRANSCRIPTOMIC	SINGLE	0	ILLUMINA	Illumina Genome Analyzer	SRP006418	GEO Series accession: GSE28532	21514197	143027	SRS188760		10090	Mus musculus	Mus musculus	SRA035365	public	YES
SRR185889	2011-04-21 12:05:07	21512087	1634918612	76	998		unspecified	ftp://ftp-private.ncbi.nlm.nih.gov/sra/sra-instant/reads/ByRun/sra/SRR/SRR185/SRR185889/SRR185889.sra	SRX057752	GSM706682: mES_RNA_Seq_shRNA3387	RNA-Seq	cDNA	TRANSCRIPTOMIC	SINGLE	0	ILLUMINA	Illumina Genome Analyzer	SRP006418	GEO Series accession: GSE28532	21514197	143027	SRS188761		10090	Mus musculus	Mus musculus	SRA035365	public	YES
SRR203276	2011-05-17 09:32:39	52645238	8002076176	152	3733		unspecified	ftp://ftp-private.ncbi.nlm.nih.gov/sra/sra-instant/reads/ByRun/sra/SRR/SRR203/SRR203276/SRR203276.sra	SRX062280	GSM722533: DCs_0h_RNASeq	RNA-Seq	cDNA	TRANSCRIPTOMIC	PAIRED	300	ILLUMINA	Illumina Genome Analyzer II	SRP006762	GEO Series accession: GSE29209	21572440	140057	SRS192946		10090	Mus musculus	Mus musculus	SRA036559	public	YES
SRR210844	2011-09-12 16:49:00	26911416	968810976	36	622		unspecified	ftp://ftp-private.ncbi.nlm.nih.gov/sra/sra-instant/reads/ByRun/sra/SRR/SRR210/SRR210844/SRR210844.sra	SRX063934	GSM727006: TOTAL_DP_RNAseq	RNA-Seq	cDNA	TRANSCRIPTOMIC	SINGLE	0	ILLUMINA	Illumina Genome Analyzer	SRP006816	GEO Series accession: GSE29362	21765417	140193	SRS193357		10090	Mus musculus	Mus musculus	SRA036915	public	NO
SRR210845	2011-09-12 16:49:00	26940243	969848748	36	602		unspecified	ftp://ftp-private.ncbi.nlm.nih.gov/sra/sra-instant/reads/ByRun/sra/SRR/SRR210/SRR210845/SRR210845.sra	SRX063934	GSM727006: TOTAL_DP_RNAseq	RNA-Seq	cDNA	TRANSCRIPTOMIC	SINGLE	0	ILLUMINA	Illumina Genome Analyzer	SRP006816	GEO Series accession: GSE29362	21765417	140193	SRS193357		10090	Mus musculus	Mus musculus	SRA036915	public	NO
SRR210846	2011-09-12 16:49:00	25723261	926037396	36	606		unspecified	ftp://ftp-private.ncbi.nlm.nih.gov/sra/sra-instant/reads/ByRun/sra/SRR/SRR210/SRR210846/SRR210846.sra	SRX063934	GSM727006: TOTAL_DP_RNAseq	RNA-Seq	cDNA	TRANSCRIPTOMIC	SINGLE	0	ILLUMINA	Illumina Genome Analyzer	SRP006816	GEO Series accession: GSE29362	21765417	140193	SRS193357		10090	Mus musculus	Mus musculus	SRA036915	public	NO
SRR210847	2011-09-12 16:49:00	26081131	938920716	36	574		unspecified	ftp://ftp-private.ncbi.nlm.nih.gov/sra/sra-instant/reads/ByRun/sra/SRR/SRR210/SRR210847/SRR210847.sra	SRX063934	GSM727006: TOTAL_DP_RNAseq	RNA-Seq	cDNA	TRANSCRIPTOMIC	SINGLE	0	ILLUMINA	Illumina Genome Analyzer	SRP006816	GEO Series accession: GSE29362	21765417	140193	SRS193357		10090	Mus musculus	Mus musculus	SRA036915	public	NO
SRR210848	2011-09-12 16:49:00	25845013	930420468	36	561		unspecified	ftp://ftp-private.ncbi.nlm.nih.gov/sra/sra-instant/reads/ByRun/sra/SRR/SRR210/SRR210848/SRR210848.sra	SRX063934	GSM727006: TOTAL_DP_RNAseq	RNA-Seq	cDNA	TRANSCRIPTOMIC	SINGLE	0	ILLUMINA	Illumina Genome Analyzer	SRP006816	GEO Series accession: GSE29362	21765417	140193	SRS193357		10090	Mus musculus	Mus musculus	SRA036915	public	NO
SRR210849	2011-09-12 16:49:00	25878569	931628484	36	564		unspecified	ftp://ftp-private.ncbi.nlm.nih.gov/sra/sra-instant/reads/ByRun/sra/SRR/SRR210/SRR210849/SRR210849.sra	SRX063934	GSM727006: TOTAL_DP_RNAseq	RNA-Seq	cDNA	TRANSCRIPTOMIC	SINGLE	0	ILLUMINA	Illumina Genome Analyzer	SRP006816	GEO Series accession: GSE29362	21765417	140193	SRS193357		10090	Mus musculus	Mus musculus	SRA036915	public	NO
SRR243586	2011-06-17 12:00:59	5906294	259876936	44	167		unspecified	ftp://ftp-private.ncbi.nlm.nih.gov/sra/sra-instant/reads/ByRun/sra/SRR/SRR243/SRR243586/SRR243586.sra	SRX070915	GSM736474: Mouse placenta RNAseq AKR/J mother x PWD/PhJ father PA	RNA-Seq	cDNA	TRANSCRIPTOMIC	SINGLE	0	ILLUMINA	Illumina Genome Analyzer	SRP006971	GEO Series accession: GSE29690	21705755	141109	SRS211596		10090		Mus musculus	SRA037581	public	YES
SRR243587	2011-06-17 12:00:59	8126448	357563712	44	221		unspecified	ftp://ftp-private.ncbi.nlm.nih.gov/sra/sra-instant/reads/ByRun/sra/SRR/SRR243/SRR243587/SRR243587.sra	SRX070915	GSM736474: Mouse placenta RNAseq AKR/J mother x PWD/PhJ father PA	RNA-Seq	cDNA	TRANSCRIPTOMIC	SINGLE	0	ILLUMINA	Illumina Genome Analyzer	SRP006971	GEO Series accession: GSE29690	21705755	141109	SRS211596		10090		Mus musculus	SRA037581	public	YES
SRR243588	2011-06-17 12:00:59	8441937	371445228	44	225		unspecified	ftp://ftp-private.ncbi.nlm.nih.gov/sra/sra-instant/reads/ByRun/sra/SRR/SRR243/SRR243588/SRR243588.sra	SRX070915	GSM736474: Mouse placenta RNAseq AKR/J mother x PWD/PhJ father PA	RNA-Seq	cDNA	TRANSCRIPTOMIC	SINGLE	0	ILLUMINA	Illumina Genome Analyzer	SRP006971	GEO Series accession: GSE29690	21705755	141109	SRS211596		10090		Mus musculus	SRA037581	public	YES
SRR243589	2011-06-17 12:00:59	8933994	393095736	44	233		unspecified	ftp://ftp-private.ncbi.nlm.nih.gov/sra/sra-instant/reads/ByRun/sra/SRR/SRR243/SRR243589/SRR243589.sra	SRX070915	GSM736474: Mouse placenta RNAseq AKR/J mother x PWD/PhJ father PA	RNA-Seq	cDNA	TRANSCRIPTOMIC	SINGLE	0	ILLUMINA	Illumina Genome Analyzer	SRP006971	GEO Series accession: GSE29690	21705755	141109	SRS211596		10090		Mus musculus	SRA037581	public	YES
SRR243590	2011-06-17 12:00:59	8355618	367647192	44	222		unspecified	ftp://ftp-private.ncbi.nlm.nih.gov/sra/sra-instant/reads/ByRun/sra/SRR/SRR243/SRR243590/SRR243590.sra	SRX070915	GSM736474: Mouse placenta RNAseq AKR/J mother x PWD/PhJ father PA	RNA-Seq	cDNA	TRANSCRIPTOMIC	SINGLE	0	ILLUMINA	Illumina Genome Analyzer	SRP006971	GEO Series accession: GSE29690	21705755	141109	SRS211596		10090		Mus musculus	SRA037581	public	YES
SRR243591	2011-06-17 12:00:59	8879954	390717976	44	232		unspecified	ftp://ftp-private.ncbi.nlm.nih.gov/sra/sra-instant/reads/ByRun/sra/SRR/SRR243/SRR243591/SRR243591.sra	SRX070915	GSM736474: Mouse placenta RNAseq AKR/J mother x PWD/PhJ father PA	RNA-Seq	cDNA	TRANSCRIPTOMIC	SINGLE	0	ILLUMINA	Illumina Genome Analyzer	SRP006971	GEO Series accession: GSE29690	21705755	141109	SRS211596		10090		Mus musculus	SRA037581	public	YES
SRR243592	2011-06-17 12:00:59	8776144	386150336	44	231		unspecified	ftp://ftp-private.ncbi.nlm.nih.gov/sra/sra-instant/reads/ByRun/sra/SRR/SRR243/SRR243592/SRR243592.sra	SRX070915	GSM736474: Mouse placenta RNAseq AKR/J mother x PWD/PhJ father PA	RNA-Seq	cDNA	TRANSCRIPTOMIC	SINGLE	0	ILLUMINA	Illumina Genome Analyzer	SRP006971	GEO Series accession: GSE29690	21705755	141109	SRS211596		10090		Mus musculus	SRA037581	public	YES
SRR243593	2011-06-17 12:00:59	5913068	212870448	36	140		unspecified	ftp://ftp-private.ncbi.nlm.nih.gov/sra/sra-instant/reads/ByRun/sra/SRR/SRR243/SRR243593/SRR243593.sra	SRX070915	GSM736474: Mouse placenta RNAseq AKR/J mother x PWD/PhJ father PA	RNA-Seq	cDNA	TRANSCRIPTOMIC	SINGLE	0	ILLUMINA	Illumina Genome Analyzer	SRP006971	GEO Series accession: GSE29690	21705755	141109	SRS211596		10090		Mus musculus	SRA037581	public	YES
SRR243594	2011-06-17 12:00:59	7483929	329292876	44	238		unspecified	ftp://ftp-private.ncbi.nlm.nih.gov/sra/sra-instant/reads/ByRun/sra/SRR/SRR243/SRR243594/SRR243594.sra	SRX070916	GSM736475: Mouse placenta RNAseq PWD/PhJ mother x AKR/J father AP	RNA-Seq	cDNA	TRANSCRIPTOMIC	SINGLE	0	ILLUMINA	Illumina Genome Analyzer	SRP006971	GEO Series accession: GSE29690	21705755	141109	SRS211597		10090		Mus musculus	SRA037581	public	YES
SRR243595	2011-06-17 12:00:59	8463280	372384320	44	266		unspecified	ftp://ftp-private.ncbi.nlm.nih.gov/sra/sra-instant/reads/ByRun/sra/SRR/SRR243/SRR243595/SRR243595.sra	SRX070916	GSM736475: Mouse placenta RNAseq PWD/PhJ mother x AKR/J father AP	RNA-Seq	cDNA	TRANSCRIPTOMIC	SINGLE	0	ILLUMINA	Illumina Genome Analyzer	SRP006971	GEO Series accession: GSE29690	21705755	141109	SRS211597		10090		Mus musculus	SRA037581	public	YES
SRR243596	2011-06-17 12:00:59	7730524	340143056	44	248		unspecified	ftp://ftp-private.ncbi.nlm.nih.gov/sra/sra-instant/reads/ByRun/sra/SRR/SRR243/SRR243596/SRR243596.sra	SRX070916	GSM736475: Mouse placenta RNAseq PWD/PhJ mother x AKR/J father AP	RNA-Seq	cDNA	TRANSCRIPTOMIC	SINGLE	0	ILLUMINA	Illumina Genome Analyzer	SRP006971	GEO Series accession: GSE29690	21705755	141109	SRS211597		10090		Mus musculus	SRA037581	public	YES
SRR243597	2011-06-17 12:00:59	7683952	338093888	44	244		unspecified	ftp://ftp-private.ncbi.nlm.nih.gov/sra/sra-instant/reads/ByRun/sra/SRR/SRR243/SRR243597/SRR243597.sra	SRX070916	GSM736475: Mouse placenta RNAseq PWD/PhJ mother x AKR/J father AP	RNA-Seq	cDNA	TRANSCRIPTOMIC	SINGLE	0	ILLUMINA	Illumina Genome Analyzer	SRP006971	GEO Series accession: GSE29690	21705755	141109	SRS211597		10090		Mus musculus	SRA037581	public	YES
SRR243598	2011-06-17 12:00:59	7782653	342436732	44	246		unspecified	ftp://ftp-private.ncbi.nlm.nih.gov/sra/sra-instant/reads/ByRun/sra/SRR/SRR243/SRR243598/SRR243598.sra	SRX070916	GSM736475: Mouse placenta RNAseq PWD/PhJ mother x AKR/J father AP	RNA-Seq	cDNA	TRANSCRIPTOMIC	SINGLE	0	ILLUMINA	Illumina Genome Analyzer	SRP006971	GEO Series accession: GSE29690	21705755	141109	SRS211597		10090		Mus musculus	SRA037581	public	YES
SRR243599	2011-06-17 12:00:59	8087950	355869800	44	253		unspecified	ftp://ftp-private.ncbi.nlm.nih.gov/sra/sra-instant/reads/ByRun/sra/SRR/SRR243/SRR243599/SRR243599.sra	SRX070916	GSM736475: Mouse placenta RNAseq PWD/PhJ mother x AKR/J father AP	RNA-Seq	cDNA	TRANSCRIPTOMIC	SINGLE	0	ILLUMINA	Illumina Genome Analyzer	SRP006971	GEO Series accession: GSE29690	21705755	141109	SRS211597		10090		Mus musculus	SRA037581	public	YES
SRR243600	2011-06-17 12:00:59	7553537	332355628	44	239		unspecified	ftp://ftp-private.ncbi.nlm.nih.gov/sra/sra-instant/reads/ByRun/sra/SRR/SRR243/SRR243600/SRR243600.sra	SRX070916	GSM736475: Mouse placenta RNAseq PWD/PhJ mother x AKR/J father AP	RNA-Seq	cDNA	TRANSCRIPTOMIC	SINGLE	0	ILLUMINA	Illumina Genome Analyzer	SRP006971	GEO Series accession: GSE29690	21705755	141109	SRS211597		10090		Mus musculus	SRA037581	public	YES
SRR243601	2011-06-17 12:00:59	7285604	320566576	44	213		unspecified	ftp://ftp-private.ncbi.nlm.nih.gov/sra/sra-instant/reads/ByRun/sra/SRR/SRR243/SRR243601/SRR243601.sra	SRX070916	GSM736475: Mouse placenta RNAseq PWD/PhJ mother x AKR/J father AP	RNA-Seq	cDNA	TRANSCRIPTOMIC	SINGLE	0	ILLUMINA	Illumina Genome Analyzer	SRP006971	GEO Series accession: GSE29690	21705755	141109	SRS211597		10090		Mus musculus	SRA037581	public	YES
SRR243602	2011-06-17 12:00:59	4001851	144066636	36	95		unspecified	ftp://ftp-private.ncbi.nlm.nih.gov/sra/sra-instant/reads/ByRun/sra/SRR/SRR243/SRR243602/SRR243602.sra	SRX070916	GSM736475: Mouse placenta RNAseq PWD/PhJ mother x AKR/J father AP	RNA-Seq	cDNA	TRANSCRIPTOMIC	SINGLE	0	ILLUMINA	Illumina Genome Analyzer	SRP006971	GEO Series accession: GSE29690	21705755	141109	SRS211597		10090		Mus musculus	SRA037581	public	YES
SRR314825	2011-11-07 14:06:27	6155890	240079710	39	156		unspecified	ftp://ftp-private.ncbi.nlm.nih.gov/sra/sra-instant/reads/ByRun/sra/SRR/SRR314/SRR314825/SRR314825.sra	SRX084381	GSM763474: mRNA_mouse	RNA-Seq	cDNA	TRANSCRIPTOMIC	SINGLE	0	ILLUMINA	Illumina Genome Analyzer	SRP007512	GEO Series accession: GSE30764	0	144103	SRS228283		10090		Mus musculus	SRA040153	public	YES
SRR314826	2011-11-07 14:06:27	24321806	1848457256	76	934		unspecified	ftp://ftp-private.ncbi.nlm.nih.gov/sra/sra-instant/reads/ByRun/sra/SRR/SRR314/SRR314826/SRR314826.sra	SRX084381	GSM763474: mRNA_mouse	RNA-Seq	cDNA	TRANSCRIPTOMIC	SINGLE	0	ILLUMINA	Illumina Genome Analyzer	SRP007512	GEO Series accession: GSE30764	0	144103	SRS228283		10090		Mus musculus	SRA040153	public	YES
SRR316184	2012-02-13 10:01:59	11954428	430359408	36	317		unspecified	ftp://ftp-private.ncbi.nlm.nih.gov/sra/sra-instant/reads/ByRun/sra/SRR/SRR316/SRR316184/SRR316184.sra	SRX085099	GSM767225: normal adult heart, replicate 1	RNA-Seq	cDNA	TRANSCRIPTOMIC	SINGLE	0	ILLUMINA	Illumina Genome Analyzer	SRP007579	GEO Series accession: GSE30943	0	146301	SRS242341		10090		Mus musculus	SRA043593	public	YES
SRR316185	2012-02-13 10:01:59	12879238	463652568	36	334		unspecified	ftp://ftp-private.ncbi.nlm.nih.gov/sra/sra-instant/reads/ByRun/sra/SRR/SRR316/SRR316185/SRR316185.sra	SRX085100	GSM767226: normal adult heart, replicate 2	RNA-Seq	cDNA	TRANSCRIPTOMIC	SINGLE	0	ILLUMINA	Illumina Genome Analyzer	SRP007579	GEO Series accession: GSE30943	0	146301	SRS242342		10090		Mus musculus	SRA043593	public	YES
SRR316186	2012-02-13 10:01:59	11838314	426179304	36	303		unspecified	ftp://ftp-private.ncbi.nlm.nih.gov/sra/sra-instant/reads/ByRun/sra/SRR/SRR316/SRR316186/SRR316186.sra	SRX085101	GSM767227: normal adult heart, replicate 3	RNA-Seq	cDNA	TRANSCRIPTOMIC	SINGLE	0	ILLUMINA	Illumina Genome Analyzer	SRP007579	GEO Series accession: GSE30943	0	146301	SRS242343		10090		Mus musculus	SRA043593	public	YES
SRR316187	2012-02-13 10:01:59	12492429	449727444	36	318		unspecified	ftp://ftp-private.ncbi.nlm.nih.gov/sra/sra-instant/reads/ByRun/sra/SRR/SRR316/SRR316187/SRR316187.sra	SRX085102	GSM767228: Tbx20 knockout adult heart, replicate 1	RNA-Seq	cDNA	TRANSCRIPTOMIC	SINGLE	0	ILLUMINA	Illumina Genome Analyzer	SRP007579	GEO Series accession: GSE30943	0	146301	SRS242344		10090		Mus musculus	SRA043593	public	YES
SRR316188	2012-02-13 10:01:59	13367957	481246452	36	342		unspecified	ftp://ftp-private.ncbi.nlm.nih.gov/sra/sra-instant/reads/ByRun/sra/SRR/SRR316/SRR316188/SRR316188.sra	SRX085103	GSM767229: Tbx20 knockout adult heart, replicate 2	RNA-Seq	cDNA	TRANSCRIPTOMIC	SINGLE	0	ILLUMINA	Illumina Genome Analyzer	SRP007579	GEO Series accession: GSE30943	0	146301	SRS242345		10090		Mus musculus	SRA043593	public	YES
SRR316189	2012-02-13 10:01:59	13103703	471733308	36	337		unspecified	ftp://ftp-private.ncbi.nlm.nih.gov/sra/sra-instant/reads/ByRun/sra/SRR/SRR316/SRR316189/SRR316189.sra	SRX085104	GSM767230: Tbx20 knockout adult heart, replicate 3	RNA-Seq	cDNA	TRANSCRIPTOMIC	SINGLE	0	ILLUMINA	Illumina Genome Analyzer	SRP007579	GEO Series accession: GSE30943	0	146301	SRS242346		10090		Mus musculus	SRA043593	public	YES
SRR327045	2011-09-12 14:28:25	26552894	6372694560	240	3848		unspecified	ftp://ftp-private.ncbi.nlm.nih.gov/sra/sra-instant/reads/ByRun/sra/SRR/SRR327/SRR327045/SRR327045.sra	SRX088978	GSM663550: retina_2 months_lane_1	RNA-Seq	cDNA	TRANSCRIPTOMIC	PAIRED	350	ILLUMINA	Illumina Genome Analyzer IIx	SRP007655	GEO Series accession: GSE26248	21775302	135077	SRS255428		10090		Mus musculus	SRA043820	public	YES
SRR342457	2011-09-12 16:33:22	25473434	6113624160	240	3691		unspecified	ftp://ftp-private.ncbi.nlm.nih.gov/sra/sra-instant/reads/ByRun/sra/SRR/SRR342/SRR342457/SRR342457.sra	SRX088979	GSM663551: retina_2 months_lane_2	RNA-Seq	cDNA	TRANSCRIPTOMIC	PAIRED	350	ILLUMINA	Illumina Genome Analyzer IIx	SRP007655	GEO Series accession: GSE26248	21775302	135077	SRS255429		10090		Mus musculus	SRA043820	public	YES
SRR342458	2011-09-12 16:33:22	26546886	6371252640	240	3849		unspecified	ftp://ftp-private.ncbi.nlm.nih.gov/sra/sra-instant/reads/ByRun/sra/SRR/SRR342/SRR342458/SRR342458.sra	SRX088980	GSM663552: retina_2 months_lane_3	RNA-Seq	cDNA	TRANSCRIPTOMIC	PAIRED	350	ILLUMINA	Illumina Genome Analyzer IIx	SRP007655	GEO Series accession: GSE26248	21775302	135077	SRS255430		10090		Mus musculus	SRA043820	public	YES
SRR327047	2011-09-12 14:45:22	25595642	6142954080	240	3678		unspecified	ftp://ftp-private.ncbi.nlm.nih.gov/sra/sra-instant/reads/ByRun/sra/SRR/SRR327/SRR327047/SRR327047.sra	SRX088981	GSM663553: retina_2 months_lane_4	RNA-Seq	cDNA	TRANSCRIPTOMIC	PAIRED	350	ILLUMINA	Illumina Genome Analyzer IIx	SRP007655	GEO Series accession: GSE26248	21775302	135077	SRS255431		10090		Mus musculus	SRA043820	public	YES
SRR363956	2011-12-01 12:44:44	12333650	444011400	36	344		unspecified	ftp://ftp-private.ncbi.nlm.nih.gov/sra/sra-instant/reads/ByRun/sra/SRR/SRR363/SRR363956/SRR363956.sra	SRX105271	GSM822758: Testes, P14 Miwi +/+ [MR09]	RNA-Seq	other	OTHER	SINGLE	0	ILLUMINA	Illumina Genome Analyzer IIx	SRP009270	GEO Series accession: GSE32184	22121019	154861	SRS270110		10090		Mus musculus	SRA047991	public	NO
SRR363957	2011-12-01 12:44:44	12262639	441455004	36	343		unspecified	ftp://ftp-private.ncbi.nlm.nih.gov/sra/sra-instant/reads/ByRun/sra/SRR/SRR363/SRR363957/SRR363957.sra	SRX105272	GSM822759: Testes, P20 Miwi +/+ [MR10]	RNA-Seq	other	OTHER	SINGLE	0	ILLUMINA	Illumina Genome Analyzer IIx	SRP009270	GEO Series accession: GSE32184	22121019	154861	SRS270111		10090		Mus musculus	SRA047991	public	NO
SRR363958	2011-12-01 12:44:44	13552234	487880424	36	376		unspecified	ftp://ftp-private.ncbi.nlm.nih.gov/sra/sra-instant/reads/ByRun/sra/SRR/SRR363/SRR363958/SRR363958.sra	SRX105273	GSM822760: Testes, Adult Miwi +/+ [MR11]	RNA-Seq	other	OTHER	SINGLE	0	ILLUMINA	Illumina Genome Analyzer IIx	SRP009270	GEO Series accession: GSE32184	22121019	154861	SRS270112		10090		Mus musculus	SRA047991	public	NO
SRR363959	2011-12-01 12:44:44	14970950	538954200	36	407		unspecified	ftp://ftp-private.ncbi.nlm.nih.gov/sra/sra-instant/reads/ByRun/sra/SRR/SRR363/SRR363959/SRR363959.sra	SRX105274	GSM822761: Testes, Adult Miwi +/ADH [MR19]	RNA-Seq	other	OTHER	SINGLE	0	ILLUMINA	Illumina Genome Analyzer IIx	SRP009270	GEO Series accession: GSE32184	22121019	154861	SRS270113		10090		Mus musculus	SRA047991	public	NO
SRR363960	2011-12-01 12:44:44	9550595	343821420	36	241		unspecified	ftp://ftp-private.ncbi.nlm.nih.gov/sra/sra-instant/reads/ByRun/sra/SRR/SRR363/SRR363960/SRR363960.sra	SRX105275	GSM822762: Testes, Adult Miwi -/ADH [MR25]	RNA-Seq	other	OTHER	SINGLE	0	ILLUMINA	Illumina Genome Analyzer IIx	SRP009270	GEO Series accession: GSE32184	22121019	154861	SRS270114		10090		Mus musculus	SRA047991	public	NO
SRR363961	2011-12-01 12:44:44	12711972	457630992	36	320		unspecified	ftp://ftp-private.ncbi.nlm.nih.gov/sra/sra-instant/reads/ByRun/sra/SRR/SRR363/SRR363961/SRR363961.sra	SRX105276	GSM822763: Testes, Adult Miwi -/ADH [MR70]	RNA-Seq	other	OTHER	SINGLE	0	ILLUMINA	Illumina Genome Analyzer IIx	SRP009270	GEO Series accession: GSE32184	22121019	154861	SRS270115		10090		Mus musculus	SRA047991	public	NO
SRR363962	2011-12-01 12:44:44	10238566	368588376	36	257		unspecified	ftp://ftp-private.ncbi.nlm.nih.gov/sra/sra-instant/reads/ByRun/sra/SRR/SRR363/SRR363962/SRR363962.sra	SRX105277	GSM822764: Testes, Adult Miwi -/ADH [MR71]	RNA-Seq	other	OTHER	SINGLE	0	ILLUMINA	Illumina Genome Analyzer IIx	SRP009270	GEO Series accession: GSE32184	22121019	154861	SRS270116		10090		Mus musculus	SRA047991	public	NO
SRR363963	2011-12-01 12:44:44	16874428	1771814940	105	954		unspecified	ftp://ftp-private.ncbi.nlm.nih.gov/sra/sra-instant/reads/ByRun/sra/SRR/SRR363/SRR363963/SRR363963.sra	SRX105278	GSM822765: Global 5' RACE +/- [MR97]	RNA-Seq	other	OTHER	SINGLE	0	ILLUMINA	Illumina Genome Analyzer II	SRP009270	GEO Series accession: GSE32184	22121019	154861	SRS270117		10090		Mus musculus	SRA047991	public	NO
SRR363964	2011-12-01 12:44:44	22906710	2405204550	105	1290		unspecified	ftp://ftp-private.ncbi.nlm.nih.gov/sra/sra-instant/reads/ByRun/sra/SRR/SRR363/SRR363964/SRR363964.sra	SRX105279	GSM822766: Global 5' RACE -/ADH [MR99]	RNA-Seq	other	OTHER	SINGLE	0	ILLUMINA	Illumina Genome Analyzer II	SRP009270	GEO Series accession: GSE32184	22121019	154861	SRS270118		10090		Mus musculus	SRA047991	public	NO
SRR363965	2011-12-01 12:44:44	28682817	2179894092	76	1304		unspecified	ftp://ftp-private.ncbi.nlm.nih.gov/sra/sra-instant/reads/ByRun/sra/SRR/SRR363/SRR363965/SRR363965.sra	SRX105280	GSM822767: Testes, Adult Miwi +/- [MR66]	RNA-Seq	cDNA	TRANSCRIPTOMIC	SINGLE	0	ILLUMINA	Illumina Genome Analyzer II	SRP009270	GEO Series accession: GSE32184	22121019	154861	SRS270119		10090		Mus musculus	SRA047991	public	YES
SRR363966	2011-12-01 12:44:44	29340327	2229864852	76	1308		unspecified	ftp://ftp-private.ncbi.nlm.nih.gov/sra/sra-instant/reads/ByRun/sra/SRR/SRR363/SRR363966/SRR363966.sra	SRX105281	GSM822768: Testes, Adult Miwi +/ADH [MR67]	RNA-Seq	cDNA	TRANSCRIPTOMIC	SINGLE	0	ILLUMINA	Illumina Genome Analyzer II	SRP009270	GEO Series accession: GSE32184	22121019	154861	SRS270120		10090		Mus musculus	SRA047991	public	YES
SRR363967	2011-12-01 12:44:44	28376987	2156651012	76	1267		unspecified	ftp://ftp-private.ncbi.nlm.nih.gov/sra/sra-instant/reads/ByRun/sra/SRR/SRR363/SRR363967/SRR363967.sra	SRX105282	GSM822769: Testes, Adult Miwi -/ADH [MR68]	RNA-Seq	cDNA	TRANSCRIPTOMIC	SINGLE	0	ILLUMINA	Illumina Genome Analyzer II	SRP009270	GEO Series accession: GSE32184	22121019	154861	SRS270121		10090		Mus musculus	SRA047991	public	YES
SRR042267	2010-07-09 16:41:27	5941753	213903108	36	226		unspecified	ftp://ftp-private.ncbi.nlm.nih.gov/sra/sra-instant/reads/ByRun/sra/SRR/SRR042/SRR042267/SRR042267.sra	SRX019937	GSM538826: SAGE_T0-1	RNA-Seq	cDNA	TRANSCRIPTOMIC	SINGLE	0	ILLUMINA	Illumina Genome Analyzer II	SRP002400	GEO Series accession: GSE21580	20615900	127015	SRS066164		10090	Mus musculus	Mus musculus	SRA012663	public	NO
SRR042268	2010-07-09 16:41:27	7768787	279676332	36	296		unspecified	ftp://ftp-private.ncbi.nlm.nih.gov/sra/sra-instant/reads/ByRun/sra/SRR/SRR042/SRR042268/SRR042268.sra	SRX019938	GSM538827: SAGE_T0-2	RNA-Seq	cDNA	TRANSCRIPTOMIC	SINGLE	0	ILLUMINA	Illumina Genome Analyzer II	SRP002400	GEO Series accession: GSE21580	20615900	127015	SRS066165		10090	Mus musculus	Mus musculus	SRA012663	public	NO
SRR042269	2010-07-09 16:41:27	6723476	242045136	36	256		unspecified	ftp://ftp-private.ncbi.nlm.nih.gov/sra/sra-instant/reads/ByRun/sra/SRR/SRR042/SRR042269/SRR042269.sra	SRX019939	GSM538828: SAGE_T0-3	RNA-Seq	cDNA	TRANSCRIPTOMIC	SINGLE	0	ILLUMINA	Illumina Genome Analyzer II	SRP002400	GEO Series accession: GSE21580	20615900	127015	SRS066166		10090	Mus musculus	Mus musculus	SRA012663	public	NO
SRR042270	2010-07-09 16:41:27	9467926	340845336	36	361		unspecified	ftp://ftp-private.ncbi.nlm.nih.gov/sra/sra-instant/reads/ByRun/sra/SRR/SRR042/SRR042270/SRR042270.sra	SRX019940	GSM538829: SAGE_T9-1	RNA-Seq	cDNA	TRANSCRIPTOMIC	SINGLE	0	ILLUMINA	Illumina Genome Analyzer II	SRP002400	GEO Series accession: GSE21580	20615900	127015	SRS066167		10090	Mus musculus	Mus musculus	SRA012663	public	NO
SRR042271	2010-07-09 16:41:27	7269002	261684072	36	277		unspecified	ftp://ftp-private.ncbi.nlm.nih.gov/sra/sra-instant/reads/ByRun/sra/SRR/SRR042/SRR042271/SRR042271.sra	SRX019941	GSM538830: SAGE_T9-2	RNA-Seq	cDNA	TRANSCRIPTOMIC	SINGLE	0	ILLUMINA	Illumina Genome Analyzer II	SRP002400	GEO Series accession: GSE21580	20615900	127015	SRS066168		10090	Mus musculus	Mus musculus	SRA012663	public	NO
SRR042272	2010-07-09 16:41:27	4392416	158126976	36	167		unspecified	ftp://ftp-private.ncbi.nlm.nih.gov/sra/sra-instant/reads/ByRun/sra/SRR/SRR042/SRR042272/SRR042272.sra	SRX019942	GSM538831: SAGE_T9-3	RNA-Seq	cDNA	TRANSCRIPTOMIC	SINGLE	0	ILLUMINA	Illumina Genome Analyzer II	SRP002400	GEO Series accession: GSE21580	20615900	127015	SRS066169		10090	Mus musculus	Mus musculus	SRA012663	public	NO
SRR091798	2011-08-15 12:13:23	18122033	1377274508	76	1383		unspecified	ftp://ftp-private.ncbi.nlm.nih.gov/sra/sra-instant/reads/ByRun/sra/SRR/SRR091/SRR091798/SRR091798.sra	SRX037955	GSM651870: Nascent RNA sequencing of C2C12 cell	RNA-Seq	cDNA	TRANSCRIPTOMIC	SINGLE	0	ILLUMINA	Illumina Genome Analyzer II	SRP005283	GEO Series accession: GSE26512	21952137	136695	SRS152477		10090	Mus musculus	Mus musculus	SRA029128	public	NO
SRR107031	2011-03-03 09:07:43	5341577	192296772	36	203		unspecified	ftp://ftp-private.ncbi.nlm.nih.gov/sra/sra-instant/reads/ByRun/sra/SRR/SRR107/SRR107031/SRR107031.sra	SRX043730	GSM672062: CLIPseq_Tdp43_high-Mnase	RNA-Seq	cDNA	TRANSCRIPTOMIC	SINGLE	0	ILLUMINA	Illumina Genome Analyzer II	SRP005859	GEO Series accession: GSE27201	21358643	142049	SRS173036		10090	Mus musculus	Mus musculus	SRA030334	public	NO
SRR107032	2011-03-03 09:07:43	12009500	432342000	36	458		unspecified	ftp://ftp-private.ncbi.nlm.nih.gov/sra/sra-instant/reads/ByRun/sra/SRR/SRR107/SRR107032/SRR107032.sra	SRX043731	GSM672063: CLIPseq_Tdp43_low-Mnase	RNA-Seq	cDNA	TRANSCRIPTOMIC	SINGLE	0	ILLUMINA	Illumina Genome Analyzer II	SRP005859	GEO Series accession: GSE27201	21358643	142049	SRS173037		10090	Mus musculus	Mus musculus	SRA030334	public	NO
SRR185887	2011-04-21 12:05:07	27137688	2062464288	76	1340		unspecified	ftp://ftp-private.ncbi.nlm.nih.gov/sra/sra-instant/reads/ByRun/sra/SRR/SRR185/SRR185887/SRR185887.sra	SRX057750	GSM706680: mES_RNA_Seq_control1	RNA-Seq	cDNA	TRANSCRIPTOMIC	SINGLE	0	ILLUMINA	Illumina Genome Analyzer	SRP006418	GEO Series accession: GSE28532	21514197	143027	SRS188759		10090	Mus musculus	Mus musculus	SRA035365	public	YES
SRR306540	2011-07-06 17:44:04	18829242	677852712	36	392		unspecified	ftp://ftp-private.ncbi.nlm.nih.gov/sra/sra-instant/reads/ByRun/sra/SRR/SRR306/SRR306540/SRR306540.sra	SRX081801	GSM750583: Neocortex_3	RNA-Seq	size fractionation	TRANSCRIPTOMIC	SINGLE	0	ILLUMINA	Illumina Genome Analyzer II	SRP007405	GEO Series accession: GSE30286	0	143587	SRS213899		10090		Mus musculus	SRA039795	public	NO
SRR306541	2011-07-06 17:48:04	30456301	1096426836	36	669		unspecified	ftp://ftp-private.ncbi.nlm.nih.gov/sra/sra-instant/reads/ByRun/sra/SRR/SRR306/SRR306541/SRR306541.sra	SRX081802	GSM750584: PV_1	RNA-Seq	size fractionation	TRANSCRIPTOMIC	SINGLE	0	ILLUMINA	Illumina Genome Analyzer II	SRP007405	GEO Series accession: GSE30286	0	143587	SRS213900		10090		Mus musculus	SRA039795	public	NO
SRR306542	2011-07-06 17:50:04	29088034	1047169224	36	580		unspecified	ftp://ftp-private.ncbi.nlm.nih.gov/sra/sra-instant/reads/ByRun/sra/SRR/SRR306/SRR306542/SRR306542.sra	SRX081803	GSM750585: PV_2	RNA-Seq	size fractionation	TRANSCRIPTOMIC	SINGLE	0	ILLUMINA	Illumina Genome Analyzer II	SRP007405	GEO Series accession: GSE30286	0	143587	SRS213901		10090		Mus musculus	SRA039795	public	NO
SRR306543	2011-07-06 17:45:04	5155697	185605092	36	92		unspecified	ftp://ftp-private.ncbi.nlm.nih.gov/sra/sra-instant/reads/ByRun/sra/SRR/SRR306/SRR306543/SRR306543.sra	SRX081804	GSM750586: SST_1	RNA-Seq	size fractionation	TRANSCRIPTOMIC	SINGLE	0	ILLUMINA	Illumina Genome Analyzer II	SRP007405	GEO Series accession: GSE30286	0	143587	SRS213902		10090		Mus musculus	SRA039795	public	NO
SRR306544	2011-07-06 17:49:04	21318227	767456172	36	387		unspecified	ftp://ftp-private.ncbi.nlm.nih.gov/sra/sra-instant/reads/ByRun/sra/SRR/SRR306/SRR306544/SRR306544.sra	SRX081805	GSM750587: SST_2	RNA-Seq	size fractionation	TRANSCRIPTOMIC	SINGLE	0	ILLUMINA	Illumina Genome Analyzer II	SRP007405	GEO Series accession: GSE30286	0	143587	SRS213903		10090		Mus musculus	SRA039795	public	NO
SRR314798	2011-08-23 10:32:19	25927769	1918654906	74	897		unspecified	ftp://ftp-private.ncbi.nlm.nih.gov/sra/sra-instant/reads/ByRun/sra/SRR/SRR314/SRR314798/SRR314798.sra	SRX084356	GSM763476: CP-1-1	RNA-Seq	cDNA	TRANSCRIPTOMIC	SINGLE	0	ILLUMINA	Illumina Genome Analyzer IIx	SRP007510	GEO Series accession: GSE30765	21873192	144333	SRS228246		10090		Mus musculus	SRA040151	public	YES
SRR314799	2011-08-23 10:32:19	26222644	1940475656	74	899		unspecified	ftp://ftp-private.ncbi.nlm.nih.gov/sra/sra-instant/reads/ByRun/sra/SRR/SRR314/SRR314799/SRR314799.sra	SRX084357	GSM763477: CP-1-2	RNA-Seq	cDNA	TRANSCRIPTOMIC	SINGLE	0	ILLUMINA	Illumina Genome Analyzer IIx	SRP007510	GEO Series accession: GSE30765	21873192	144333	SRS228247		10090		Mus musculus	SRA040151	public	YES
SRR314800	2011-08-23 10:32:19	23228728	1718925872	74	760		unspecified	ftp://ftp-private.ncbi.nlm.nih.gov/sra/sra-instant/reads/ByRun/sra/SRR/SRR314/SRR314800/SRR314800.sra	SRX084358	GSM763478: SVZ-IZ-1-1	RNA-Seq	cDNA	TRANSCRIPTOMIC	SINGLE	0	ILLUMINA	Illumina Genome Analyzer IIx	SRP007510	GEO Series accession: GSE30765	21873192	144333	SRS228248		10090		Mus musculus	SRA040151	public	YES
SRR314801	2011-08-23 10:32:19	23762174	1758400876	74	769		unspecified	ftp://ftp-private.ncbi.nlm.nih.gov/sra/sra-instant/reads/ByRun/sra/SRR/SRR314/SRR314801/SRR314801.sra	SRX084359	GSM763479: SVZ-IZ-1-2	RNA-Seq	cDNA	TRANSCRIPTOMIC	SINGLE	0	ILLUMINA	Illumina Genome Analyzer IIx	SRP007510	GEO Series accession: GSE30765	21873192	144333	SRS228249		10090		Mus musculus	SRA040151	public	YES
SRR314802	2011-08-23 10:32:19	25406840	1880106160	74	847		unspecified	ftp://ftp-private.ncbi.nlm.nih.gov/sra/sra-instant/reads/ByRun/sra/SRR/SRR314/SRR314802/SRR314802.sra	SRX084360	GSM763480: VZ-1-1	RNA-Seq	cDNA	TRANSCRIPTOMIC	SINGLE	0	ILLUMINA	Illumina Genome Analyzer IIx	SRP007510	GEO Series accession: GSE30765	21873192	144333	SRS228250		10090		Mus musculus	SRA040151	public	YES
SRR314803	2011-08-23 10:32:19	24553842	1816984308	74	805		unspecified	ftp://ftp-private.ncbi.nlm.nih.gov/sra/sra-instant/reads/ByRun/sra/SRR/SRR314/SRR314803/SRR314803.sra	SRX084361	GSM763481: VZ-1-2	RNA-Seq	cDNA	TRANSCRIPTOMIC	SINGLE	0	ILLUMINA	Illumina Genome Analyzer IIx	SRP007510	GEO Series accession: GSE30765	21873192	144333	SRS228251		10090		Mus musculus	SRA040151	public	YES
SRR314804	2011-08-23 10:32:19	28922261	2140247314	74	1008		unspecified	ftp://ftp-private.ncbi.nlm.nih.gov/sra/sra-instant/reads/ByRun/sra/SRR/SRR314/SRR314804/SRR314804.sra	SRX084362	GSM763482: CP-2-1	RNA-Seq	cDNA	TRANSCRIPTOMIC	SINGLE	0	ILLUMINA	Illumina Genome Analyzer IIx	SRP007510	GEO Series accession: GSE30765	21873192	144333	SRS228252		10090		Mus musculus	SRA040151	public	YES
SRR314805	2011-08-23 10:32:19	30721197	2273368578	74	1084		unspecified	ftp://ftp-private.ncbi.nlm.nih.gov/sra/sra-instant/reads/ByRun/sra/SRR/SRR314/SRR314805/SRR314805.sra	SRX084363	GSM763483: CP-2-2	RNA-Seq	cDNA	TRANSCRIPTOMIC	SINGLE	0	ILLUMINA	Illumina Genome Analyzer IIx	SRP007510	GEO Series accession: GSE30765	21873192	144333	SRS228253		10090		Mus musculus	SRA040151	public	YES
SRR314806	2011-08-23 10:32:19	28123559	2081143366	74	979		unspecified	ftp://ftp-private.ncbi.nlm.nih.gov/sra/sra-instant/reads/ByRun/sra/SRR/SRR314/SRR314806/SRR314806.sra	SRX084364	GSM763484: SVZ-IZ-2-1	RNA-Seq	cDNA	TRANSCRIPTOMIC	SINGLE	0	ILLUMINA	Illumina Genome Analyzer IIx	SRP007510	GEO Series accession: GSE30765	21873192	144333	SRS228254		10090		Mus musculus	SRA040151	public	YES
SRR314807	2011-08-23 10:32:19	28056871	2076208454	74	975		unspecified	ftp://ftp-private.ncbi.nlm.nih.gov/sra/sra-instant/reads/ByRun/sra/SRR/SRR314/SRR314807/SRR314807.sra	SRX084365	GSM763485: SVZ-IZ-2-2	RNA-Seq	cDNA	TRANSCRIPTOMIC	SINGLE	0	ILLUMINA	Illumina Genome Analyzer IIx	SRP007510	GEO Series accession: GSE30765	21873192	144333	SRS228255		10090		Mus musculus	SRA040151	public	YES
SRR314808	2011-08-23 10:32:19	28480020	2107521480	74	984		unspecified	ftp://ftp-private.ncbi.nlm.nih.gov/sra/sra-instant/reads/ByRun/sra/SRR/SRR314/SRR314808/SRR314808.sra	SRX084366	GSM763486: VZ-2-1	RNA-Seq	cDNA	TRANSCRIPTOMIC	SINGLE	0	ILLUMINA	Illumina Genome Analyzer IIx	SRP007510	GEO Series accession: GSE30765	21873192	144333	SRS228256		10090		Mus musculus	SRA040151	public	YES
SRR314809	2011-08-23 10:32:19	27308456	2020825744	74	947		unspecified	ftp://ftp-private.ncbi.nlm.nih.gov/sra/sra-instant/reads/ByRun/sra/SRR/SRR314/SRR314809/SRR314809.sra	SRX084367	GSM763487: VZ-2-2	RNA-Seq	cDNA	TRANSCRIPTOMIC	SINGLE	0	ILLUMINA	Illumina Genome Analyzer IIx	SRP007510	GEO Series accession: GSE30765	21873192	144333	SRS228257		10090		Mus musculus	SRA040151	public	YES
SRR342322	2011-09-09 12:01:22	19806505	1287422825	65	763		unspecified	ftp://ftp-private.ncbi.nlm.nih.gov/sra/sra-instant/reads/ByRun/sra/SRR/SRR342/SRR342322/SRR342322.sra	SRX096373	GSM789705: Sedentary_control_1	RNA-Seq	cDNA	TRANSCRIPTOMIC	SINGLE	0	ILLUMINA	Illumina Genome Analyzer IIx	SRP008123	GEO Series accession: GSE31839	0	155263	SRS260270		10090		Mus musculus	SRA045809	public	YES
SRR342323	2011-09-09 12:05:22	19864273	1291177745	65	747		unspecified	ftp://ftp-private.ncbi.nlm.nih.gov/sra/sra-instant/reads/ByRun/sra/SRR/SRR342/SRR342323/SRR342323.sra	SRX096374	GSM789706: Sedentary_control_2	RNA-Seq	cDNA	TRANSCRIPTOMIC	SINGLE	0	ILLUMINA	Illumina Genome Analyzer IIx	SRP008123	GEO Series accession: GSE31839	0	155263	SRS260271		10090		Mus musculus	SRA045809	public	YES
SRR342324	2011-09-09 12:07:22	17913523	1164378995	65	676		unspecified	ftp://ftp-private.ncbi.nlm.nih.gov/sra/sra-instant/reads/ByRun/sra/SRR/SRR342/SRR342324/SRR342324.sra	SRX096375	GSM789707: Sedentary_control_3	RNA-Seq	cDNA	TRANSCRIPTOMIC	SINGLE	0	ILLUMINA	Illumina Genome Analyzer IIx	SRP008123	GEO Series accession: GSE31839	0	155263	SRS260272		10090		Mus musculus	SRA045809	public	YES
SRR342325	2011-09-09 11:56:22	18336293	1191859045	65	715		unspecified	ftp://ftp-private.ncbi.nlm.nih.gov/sra/sra-instant/reads/ByRun/sra/SRR/SRR342/SRR342325/SRR342325.sra	SRX096376	GSM789708: Sedentary_Mstn_deficient_1	RNA-Seq	cDNA	TRANSCRIPTOMIC	SINGLE	0	ILLUMINA	Illumina Genome Analyzer IIx	SRP008123	GEO Series accession: GSE31839	0	155263	SRS260273		10090		Mus musculus	SRA045809	public	YES
SRR342326	2011-09-09 11:59:22	20270240	1317565600	65	779		unspecified	ftp://ftp-private.ncbi.nlm.nih.gov/sra/sra-instant/reads/ByRun/sra/SRR/SRR342/SRR342326/SRR342326.sra	SRX096377	GSM789709: Sedentary_Mstn_deficient_2	RNA-Seq	cDNA	TRANSCRIPTOMIC	SINGLE	0	ILLUMINA	Illumina Genome Analyzer IIx	SRP008123	GEO Series accession: GSE31839	0	155263	SRS260274		10090		Mus musculus	SRA045809	public	YES
SRR342327	2011-09-09 12:13:22	20245631	1315966015	65	787		unspecified	ftp://ftp-private.ncbi.nlm.nih.gov/sra/sra-instant/reads/ByRun/sra/SRR/SRR342/SRR342327/SRR342327.sra	SRX096378	GSM789710: Sedentary_Mstn_deficient_3	RNA-Seq	cDNA	TRANSCRIPTOMIC	SINGLE	0	ILLUMINA	Illumina Genome Analyzer IIx	SRP008123	GEO Series accession: GSE31839	0	155263	SRS260275		10090		Mus musculus	SRA045809	public	YES
SRR342328	2011-09-09 11:47:23	20040653	1302642445	65	767		unspecified	ftp://ftp-private.ncbi.nlm.nih.gov/sra/sra-instant/reads/ByRun/sra/SRR/SRR342/SRR342328/SRR342328.sra	SRX096379	GSM789711: Active_control_1	RNA-Seq	cDNA	TRANSCRIPTOMIC	SINGLE	0	ILLUMINA	Illumina Genome Analyzer IIx	SRP008123	GEO Series accession: GSE31839	0	155263	SRS260276		10090		Mus musculus	SRA045809	public	YES
SRR342329	2011-09-09 11:50:23	17463732	1135142580	65	665		unspecified	ftp://ftp-private.ncbi.nlm.nih.gov/sra/sra-instant/reads/ByRun/sra/SRR/SRR342/SRR342329/SRR342329.sra	SRX096380	GSM789712: Active_control_2	RNA-Seq	cDNA	TRANSCRIPTOMIC	SINGLE	0	ILLUMINA	Illumina Genome Analyzer IIx	SRP008123	GEO Series accession: GSE31839	0	155263	SRS260277		10090		Mus musculus	SRA045809	public	YES
SRR342330	2011-09-09 11:54:23	23393334	1520566710	65	892		unspecified	ftp://ftp-private.ncbi.nlm.nih.gov/sra/sra-instant/reads/ByRun/sra/SRR/SRR342/SRR342330/SRR342330.sra	SRX096381	GSM789713: Active_control_3	RNA-Seq	cDNA	TRANSCRIPTOMIC	SINGLE	0	ILLUMINA	Illumina Genome Analyzer IIx	SRP008123	GEO Series accession: GSE31839	0	155263	SRS260278		10090		Mus musculus	SRA045809	public	YES
SRR342331	2011-09-09 11:48:21	21724102	1412066630	65	826		unspecified	ftp://ftp-private.ncbi.nlm.nih.gov/sra/sra-instant/reads/ByRun/sra/SRR/SRR342/SRR342331/SRR342331.sra	SRX096382	GSM789714: Active_Mstn_deficient_1	RNA-Seq	cDNA	TRANSCRIPTOMIC	SINGLE	0	ILLUMINA	Illumina Genome Analyzer IIx	SRP008123	GEO Series accession: GSE31839	0	155263	SRS260279		10090		Mus musculus	SRA045809	public	YES
SRR342332	2011-09-09 12:10:22	23815091	1547980915	65	906		unspecified	ftp://ftp-private.ncbi.nlm.nih.gov/sra/sra-instant/reads/ByRun/sra/SRR/SRR342/SRR342332/SRR342332.sra	SRX096383	GSM789715: Active_Mstn_deficient_2	RNA-Seq	cDNA	TRANSCRIPTOMIC	SINGLE	0	ILLUMINA	Illumina Genome Analyzer IIx	SRP008123	GEO Series accession: GSE31839	0	155263	SRS260280		10090		Mus musculus	SRA045809	public	YES
SRR342333	2011-09-09 12:13:22	20675801	1343927065	65	796		unspecified	ftp://ftp-private.ncbi.nlm.nih.gov/sra/sra-instant/reads/ByRun/sra/SRR/SRR342/SRR342333/SRR342333.sra	SRX096384	GSM789716: Active_Mstn_deficient_3	RNA-Seq	cDNA	TRANSCRIPTOMIC	SINGLE	0	ILLUMINA	Illumina Genome Analyzer IIx	SRP008123	GEO Series accession: GSE31839	0	155263	SRS260281		10090		Mus musculus	SRA045809	public	YES
SRR345196	2011-10-06 09:14:49	9764245	351512820	36	313		unspecified	ftp://ftp-private.ncbi.nlm.nih.gov/sra/sra-instant/reads/ByRun/sra/SRR/SRR345/SRR345196/SRR345196.sra	SRX097257	GSM794736: Untreated mouse hippocampus replicate 1	RNA-Seq	size fractionation	TRANSCRIPTOMIC	SINGLE	0	ILLUMINA	Illumina Genome Analyzer II	SRP008223	GEO Series accession: GSE32055	21984899	147627	SRS261135		10090		Mus musculus	SRA045927	public	NO
SRR345197	2011-10-06 09:14:49	11908179	381061728	32	327		unspecified	ftp://ftp-private.ncbi.nlm.nih.gov/sra/sra-instant/reads/ByRun/sra/SRR/SRR345/SRR345197/SRR345197.sra	SRX097258	GSM794737: hippocampus 0.5h following ECS replicate 1	RNA-Seq	size fractionation	TRANSCRIPTOMIC	SINGLE	0	ILLUMINA	Illumina Genome Analyzer II	SRP008223	GEO Series accession: GSE32055	21984899	147627	SRS261136		10090		Mus musculus	SRA045927	public	NO
SRR345198	2011-10-06 09:14:49	11530375	368972000	32	315		unspecified	ftp://ftp-private.ncbi.nlm.nih.gov/sra/sra-instant/reads/ByRun/sra/SRR/SRR345/SRR345198/SRR345198.sra	SRX097259	GSM794738: hippocampus 1h following ECS replicate 1	RNA-Seq	size fractionation	TRANSCRIPTOMIC	SINGLE	0	ILLUMINA	Illumina Genome Analyzer II	SRP008223	GEO Series accession: GSE32055	21984899	147627	SRS261137		10090		Mus musculus	SRA045927	public	NO
SRR345199	2011-10-06 09:14:49	11157967	357054944	32	303		unspecified	ftp://ftp-private.ncbi.nlm.nih.gov/sra/sra-instant/reads/ByRun/sra/SRR/SRR345/SRR345199/SRR345199.sra	SRX097260	GSM794739: hippocampus 3h following ECS replicate 1	RNA-Seq	size fractionation	TRANSCRIPTOMIC	SINGLE	0	ILLUMINA	Illumina Genome Analyzer II	SRP008223	GEO Series accession: GSE32055	21984899	147627	SRS261138		10090		Mus musculus	SRA045927	public	NO
SRR345200	2011-10-06 09:14:49	12013678	384437696	32	309		unspecified	ftp://ftp-private.ncbi.nlm.nih.gov/sra/sra-instant/reads/ByRun/sra/SRR/SRR345/SRR345200/SRR345200.sra	SRX097261	GSM794740: hippocampus 6h following ECS replicate 1	RNA-Seq	size fractionation	TRANSCRIPTOMIC	SINGLE	0	ILLUMINA	Illumina Genome Analyzer II	SRP008223	GEO Series accession: GSE32055	21984899	147627	SRS261139		10090		Mus musculus	SRA045927	public	NO
SRR345201	2011-10-06 09:14:49	10490372	335691904	32	287		unspecified	ftp://ftp-private.ncbi.nlm.nih.gov/sra/sra-instant/reads/ByRun/sra/SRR/SRR345/SRR345201/SRR345201.sra	SRX097262	GSM794741: hippocampus 24h following ECS replicate 1	RNA-Seq	size fractionation	TRANSCRIPTOMIC	SINGLE	0	ILLUMINA	Illumina Genome Analyzer II	SRP008223	GEO Series accession: GSE32055	21984899	147627	SRS261140		10090		Mus musculus	SRA045927	public	NO
SRR345202	2011-10-06 09:14:49	9607729	345878244	36	293		unspecified	ftp://ftp-private.ncbi.nlm.nih.gov/sra/sra-instant/reads/ByRun/sra/SRR/SRR345/SRR345202/SRR345202.sra	SRX097263	GSM794742: Untreated mouse hippocampus replicate 2	RNA-Seq	size fractionation	TRANSCRIPTOMIC	SINGLE	0	ILLUMINA	Illumina Genome Analyzer II	SRP008223	GEO Series accession: GSE32055	21984899	147627	SRS261141		10090		Mus musculus	SRA045927	public	NO
SRR345203	2011-10-06 09:14:49	10339529	372223044	36	323		unspecified	ftp://ftp-private.ncbi.nlm.nih.gov/sra/sra-instant/reads/ByRun/sra/SRR/SRR345/SRR345203/SRR345203.sra	SRX097264	GSM794743: hippocampus 0.5h following ECS replicate 2	RNA-Seq	size fractionation	TRANSCRIPTOMIC	SINGLE	0	ILLUMINA	Illumina Genome Analyzer II	SRP008223	GEO Series accession: GSE32055	21984899	147627	SRS261142		10090		Mus musculus	SRA045927	public	NO
SRR345204	2011-10-06 09:14:49	8818451	317464236	36	259		unspecified	ftp://ftp-private.ncbi.nlm.nih.gov/sra/sra-instant/reads/ByRun/sra/SRR/SRR345/SRR345204/SRR345204.sra	SRX097265	GSM794744: hippocampus 1h following ECS replicate 2	RNA-Seq	size fractionation	TRANSCRIPTOMIC	SINGLE	0	ILLUMINA	Illumina Genome Analyzer II	SRP008223	GEO Series accession: GSE32055	21984899	147627	SRS261143		10090		Mus musculus	SRA045927	public	NO
SRR345205	2011-10-06 09:14:49	9956701	358441236	36	317		unspecified	ftp://ftp-private.ncbi.nlm.nih.gov/sra/sra-instant/reads/ByRun/sra/SRR/SRR345/SRR345205/SRR345205.sra	SRX097266	GSM794745: hippocampus 3h following ECS replicate 2	RNA-Seq	size fractionation	TRANSCRIPTOMIC	SINGLE	0	ILLUMINA	Illumina Genome Analyzer II	SRP008223	GEO Series accession: GSE32055	21984899	147627	SRS261144		10090		Mus musculus	SRA045927	public	NO
SRR345206	2011-10-06 09:14:49	3127338	112584168	36	73		unspecified	ftp://ftp-private.ncbi.nlm.nih.gov/sra/sra-instant/reads/ByRun/sra/SRR/SRR345/SRR345206/SRR345206.sra	SRX097267	GSM794746: hippocampus 6h following ECS replicate 2	RNA-Seq	size fractionation	TRANSCRIPTOMIC	SINGLE	0	ILLUMINA	Illumina Genome Analyzer II	SRP008223	GEO Series accession: GSE32055	21984899	147627	SRS261145		10090		Mus musculus	SRA045927	public	NO
SRR345207	2011-10-06 09:14:49	9533543	343207548	36	298		unspecified	ftp://ftp-private.ncbi.nlm.nih.gov/sra/sra-instant/reads/ByRun/sra/SRR/SRR345/SRR345207/SRR345207.sra	SRX097268	GSM794747: hippocampus 24h following ECS replicate 2	RNA-Seq	size fractionation	TRANSCRIPTOMIC	SINGLE	0	ILLUMINA	Illumina Genome Analyzer II	SRP008223	GEO Series accession: GSE32055	21984899	147627	SRS261146		10090		Mus musculus	SRA045927	public	NO
SRR351925	2011-10-14 12:15:28	5327866	191803176	36	86			ftp://ftp-private.ncbi.nlm.nih.gov/sra/sra-instant/reads/ByRun/sra/SRR/SRR351/SRR351925/SRR351925.sra	SRX100617	GSM813777: Mouse_TotalHeart_miRNA_MALE	RNA-Seq	cDNA	TRANSCRIPTOMIC	SINGLE	0	ILLUMINA	Illumina Genome Analyzer II	SRP008802	GEO Series accession: GSE32881	19679836	146611	SRS266733		10090		Mus musculus	SRA046967	public	NO
SRR351926	2011-10-14 12:15:28	3837291	138142476	36	86			ftp://ftp-private.ncbi.nlm.nih.gov/sra/sra-instant/reads/ByRun/sra/SRR/SRR351/SRR351926/SRR351926.sra	SRX100618	GSM813778: Mouse_TotalHeart_miRNA_FEMALE	RNA-Seq	cDNA	TRANSCRIPTOMIC	SINGLE	0	ILLUMINA	Illumina Genome Analyzer II	SRP008802	GEO Series accession: GSE32881	19679836	146611	SRS266734		10090		Mus musculus	SRA046967	public	NO
SRR358714	2011-10-26 12:09:24	35872104	2511047280	70	1481		unspecified	ftp://ftp-private.ncbi.nlm.nih.gov/sra/sra-instant/reads/ByRun/sra/SRR/SRR358/SRR358714/SRR358714.sra	SRX103286	GSM820728: wild-type_rep1	RNA-Seq	cDNA	TRANSCRIPTOMIC	SINGLE	0	ILLUMINA	Illumina Genome Analyzer IIx	SRP009096	GEO Series accession: GSE33141	0	149389	SRS269114		10090		Mus musculus	SRA047339	public	YES
SRR358715	2011-10-26 12:14:27	41766375	2923646250	70	1718		unspecified	ftp://ftp-private.ncbi.nlm.nih.gov/sra/sra-instant/reads/ByRun/sra/SRR/SRR358/SRR358715/SRR358715.sra	SRX103287	GSM820729: wild-type_rep2	RNA-Seq	cDNA	TRANSCRIPTOMIC	SINGLE	0	ILLUMINA	Illumina Genome Analyzer IIx	SRP009096	GEO Series accession: GSE33141	0	149389	SRS269115		10090		Mus musculus	SRA047339	public	YES
SRR358716	2011-10-26 12:22:27	49076404	3435348280	70	2045		unspecified	ftp://ftp-private.ncbi.nlm.nih.gov/sra/sra-instant/reads/ByRun/sra/SRR/SRR358/SRR358716/SRR358716.sra	SRX103288	GSM820730: wild-type_rep3	RNA-Seq	cDNA	TRANSCRIPTOMIC	SINGLE	0	ILLUMINA	Illumina Genome Analyzer IIx	SRP009096	GEO Series accession: GSE33141	0	149389	SRS269116		10090		Mus musculus	SRA047339	public	YES
SRR358717	2011-10-26 12:26:28	46689308	3268251560	70	1950		unspecified	ftp://ftp-private.ncbi.nlm.nih.gov/sra/sra-instant/reads/ByRun/sra/SRR/SRR358/SRR358717/SRR358717.sra	SRX103289	GSM820731: Nrl-KO_rep1	RNA-Seq	cDNA	TRANSCRIPTOMIC	SINGLE	0	ILLUMINA	Illumina Genome Analyzer IIx	SRP009096	GEO Series accession: GSE33141	0	149389	SRS269117		10090		Mus musculus	SRA047339	public	YES
SRR358718	2011-10-26 12:30:23	48480286	3393620020	70	2015		unspecified	ftp://ftp-private.ncbi.nlm.nih.gov/sra/sra-instant/reads/ByRun/sra/SRR/SRR358/SRR358718/SRR358718.sra	SRX103290	GSM820732: Nrl-KO_rep2	RNA-Seq	cDNA	TRANSCRIPTOMIC	SINGLE	0	ILLUMINA	Illumina Genome Analyzer IIx	SRP009096	GEO Series accession: GSE33141	0	149389	SRS269118		10090		Mus musculus	SRA047339	public	YES
SRR358719	2011-10-26 12:32:23	48656049	3405923430	70	2022		unspecified	ftp://ftp-private.ncbi.nlm.nih.gov/sra/sra-instant/reads/ByRun/sra/SRR/SRR358/SRR358719/SRR358719.sra	SRX103291	GSM820733: Nrl-KO_rep3	RNA-Seq	cDNA	TRANSCRIPTOMIC	SINGLE	0	ILLUMINA	Illumina Genome Analyzer IIx	SRP009096	GEO Series accession: GSE33141	0	149389	SRS269119		10090		Mus musculus	SRA047339	public	YES
SRR039427	2011-11-23 14:47:05	5142601	185133636	36	196		unspecified	ftp://ftp-private.ncbi.nlm.nih.gov/sra/sra-instant/reads/ByRun/sra/SRR/SRR039/SRR039427/SRR039427.sra	SRX018858	GSM509275: MitoPLD / E16.5 small RNA	RNA-Seq	size fractionation	TRANSCRIPTOMIC	SINGLE	0	ILLUMINA	Illumina Genome Analyzer	SRP002253	GEO Series accession: GSE20327	20439430	125393	SRS058928		10090	Mus musculus	Mus musculus	SRA012402	public	NO
SRR039428	2011-11-23 14:47:05	5661263	203805468	36	215		unspecified	ftp://ftp-private.ncbi.nlm.nih.gov/sra/sra-instant/reads/ByRun/sra/SRR/SRR039/SRR039428/SRR039428.sra	SRX018859	GSM509276: MitoPLD-/- E16.5 small RNA	RNA-Seq	size fractionation	TRANSCRIPTOMIC	SINGLE	0	ILLUMINA	Illumina Genome Analyzer	SRP002253	GEO Series accession: GSE20327	20439430	125393	SRS058929		10090	Mus musculus	Mus musculus	SRA012402	public	NO
SRR039432	2011-11-23 14:47:05	12853284	462718224	36	490		unspecified	ftp://ftp-private.ncbi.nlm.nih.gov/sra/sra-instant/reads/ByRun/sra/SRR/SRR039/SRR039432/SRR039432.sra	SRX018863	GSM509280: Zuc-/- 10 dpp small RNA	RNA-Seq	size fractionation	TRANSCRIPTOMIC	SINGLE	0	ILLUMINA	Illumina Genome Analyzer	SRP002253	GEO Series accession: GSE20327	20439430	125393	SRS058933		10090	Mus musculus	Mus musculus	SRA012402	public	NO
SRR039999	2010-05-04 09:47:00	19147701	2910450552	152	2848		unspecified	ftp://ftp-private.ncbi.nlm.nih.gov/sra/sra-instant/reads/ByRun/sra/SRR/SRR039/SRR039999/SRR039999.sra	SRX019275	GSM521650: ESC_RNASeq	RNA-Seq	cDNA	TRANSCRIPTOMIC	PAIRED	270	ILLUMINA	Illumina Genome Analyzer II	SRP002325	GEO Series accession: GSE20851	20436462	124759	SRS059567		10090	Mus musculus	Mus musculus	SRA012498	public	YES
SRR040000	2010-05-04 09:47:00	19756540	3002994080	152	2939		unspecified	ftp://ftp-private.ncbi.nlm.nih.gov/sra/sra-instant/reads/ByRun/sra/SRR/SRR040/SRR040000/SRR040000.sra	SRX019275	GSM521650: ESC_RNASeq	RNA-Seq	cDNA	TRANSCRIPTOMIC	PAIRED	270	ILLUMINA	Illumina Genome Analyzer II	SRP002325	GEO Series accession: GSE20851	20436462	124759	SRS059567		10090	Mus musculus	Mus musculus	SRA012498	public	YES
SRR040001	2010-05-04 09:47:00	19161154	2912495408	152	2850		unspecified	ftp://ftp-private.ncbi.nlm.nih.gov/sra/sra-instant/reads/ByRun/sra/SRR/SRR040/SRR040001/SRR040001.sra	SRX019275	GSM521650: ESC_RNASeq	RNA-Seq	cDNA	TRANSCRIPTOMIC	PAIRED	270	ILLUMINA	Illumina Genome Analyzer II	SRP002325	GEO Series accession: GSE20851	20436462	124759	SRS059567		10090	Mus musculus	Mus musculus	SRA012498	public	YES
SRR040002	2010-05-04 09:47:00	33045830	4626416200	140	4538		unspecified	ftp://ftp-private.ncbi.nlm.nih.gov/sra/sra-instant/reads/ByRun/sra/SRR/SRR040/SRR040002/SRR040002.sra	SRX019276	GSM521651: MLF_RNASeq	RNA-Seq	cDNA	TRANSCRIPTOMIC	PAIRED	270	ILLUMINA	Illumina Genome Analyzer II	SRP002325	GEO Series accession: GSE20851	20436462	124759	SRS059568		10090	Mus musculus	Mus musculus	SRA012498	public	YES
SRR040003	2010-05-04 09:47:00	33610501	4705470140	140	4615		unspecified	ftp://ftp-private.ncbi.nlm.nih.gov/sra/sra-instant/reads/ByRun/sra/SRR/SRR040/SRR040003/SRR040003.sra	SRX019276	GSM521651: MLF_RNASeq	RNA-Seq	cDNA	TRANSCRIPTOMIC	PAIRED	270	ILLUMINA	Illumina Genome Analyzer II	SRP002325	GEO Series accession: GSE20851	20436462	124759	SRS059568		10090	Mus musculus	Mus musculus	SRA012498	public	YES
SRR040004	2010-05-04 09:47:00	31866618	4461326520	140	4376		unspecified	ftp://ftp-private.ncbi.nlm.nih.gov/sra/sra-instant/reads/ByRun/sra/SRR/SRR040/SRR040004/SRR040004.sra	SRX019277	GSM521652: NPC_RNASeq	RNA-Seq	cDNA	TRANSCRIPTOMIC	PAIRED	270	ILLUMINA	Illumina Genome Analyzer II	SRP002325	GEO Series accession: GSE20851	20436462	124759	SRS059569		10090	Mus musculus	Mus musculus	SRA012498	public	YES
SRR040005	2010-05-04 09:47:00	28161376	4280529152	152	4189			ftp://ftp-private.ncbi.nlm.nih.gov/sra/sra-instant/reads/ByRun/sra/SRR/SRR040/SRR040005/SRR040005.sra	SRX019278	GSM521652: NPC_RNASeq	RNA-Seq	cDNA	TRANSCRIPTOMIC	PAIRED	270	ILLUMINA	Illumina Genome Analyzer II	SRP002325	GEO Series accession: GSE20851	20436462	124759	SRS059569		10090	Mus musculus	Mus musculus	SRA012498	public	YES
SRR042443	2010-06-07 10:08:23	5495367	142879542	26	157		unspecified	ftp://ftp-private.ncbi.nlm.nih.gov/sra/sra-instant/reads/ByRun/sra/SRR/SRR042/SRR042443/SRR042443.sra	SRX020037	GSM539835: mouse pro B cells [09-002]	RNA-Seq	size fractionation	TRANSCRIPTOMIC	SINGLE	0	ILLUMINA	Illumina Genome Analyzer II	SRP002412	GEO Series accession: GSE21630	20605486	127103	SRS066220		10090	Mus musculus	Mus musculus	SRA012686	public	NO
SRR042444	2010-06-07 10:08:23	5251449	136537674	26	150		unspecified	ftp://ftp-private.ncbi.nlm.nih.gov/sra/sra-instant/reads/ByRun/sra/SRR/SRR042/SRR042444/SRR042444.sra	SRX020038	GSM539836: mouse pre B cells [09-002]	RNA-Seq	size fractionation	TRANSCRIPTOMIC	SINGLE	0	ILLUMINA	Illumina Genome Analyzer II	SRP002412	GEO Series accession: GSE21630	20605486	127103	SRS066221		10090	Mus musculus	Mus musculus	SRA012686	public	NO
SRR042445	2010-06-07 10:08:23	4957178	148715340	30	160		unspecified	ftp://ftp-private.ncbi.nlm.nih.gov/sra/sra-instant/reads/ByRun/sra/SRR/SRR042/SRR042445/SRR042445.sra	SRX020039	GSM539837: mouse immature B cells [09-002]	RNA-Seq	size fractionation	TRANSCRIPTOMIC	SINGLE	0	ILLUMINA	Illumina Genome Analyzer II	SRP002412	GEO Series accession: GSE21630	20605486	127103	SRS066222		10090	Mus musculus	Mus musculus	SRA012686	public	NO
SRR042446	2010-06-07 10:08:23	3989601	127667232	32	137		unspecified	ftp://ftp-private.ncbi.nlm.nih.gov/sra/sra-instant/reads/ByRun/sra/SRR/SRR042/SRR042446/SRR042446.sra	SRX020040	GSM539838: mouse mature B cells (spleen) replicate 1 [09-002]	RNA-Seq	size fractionation	TRANSCRIPTOMIC	SINGLE	0	ILLUMINA	Illumina Genome Analyzer II	SRP002412	GEO Series accession: GSE21630	20605486	127103	SRS066223		10090	Mus musculus	Mus musculus	SRA012686	public	NO
SRR042447	2010-06-07 10:08:23	9669987	348119532	36	368			ftp://ftp-private.ncbi.nlm.nih.gov/sra/sra-instant/reads/ByRun/sra/SRR/SRR042/SRR042447/SRR042447.sra	SRX020041	GSM539839: mouse mature B cells (spleen) replicate 2 [09-002]	RNA-Seq	size fractionation	TRANSCRIPTOMIC	SINGLE	0	ILLUMINA	Illumina Genome Analyzer II	SRP002412	GEO Series accession: GSE21630	20605486	127103	SRS066224		10090	Mus musculus	Mus musculus	SRA012686	public	NO
SRR042448	2010-06-07 10:08:23	5220277	156608310	30	169		unspecified	ftp://ftp-private.ncbi.nlm.nih.gov/sra/sra-instant/reads/ByRun/sra/SRR/SRR042/SRR042448/SRR042448.sra	SRX020042	GSM539840: mouse B cells activated in vitro with LPS/IL4 replicate 1 [09-002]	RNA-Seq	size fractionation	TRANSCRIPTOMIC	SINGLE	0	ILLUMINA	Illumina Genome Analyzer II	SRP002412	GEO Series accession: GSE21630	20605486	127103	SRS066225		10090	Mus musculus	Mus musculus	SRA012686	public	NO
SRR042449	2010-06-07 10:08:23	8819667	317508012	36	336		unspecified	ftp://ftp-private.ncbi.nlm.nih.gov/sra/sra-instant/reads/ByRun/sra/SRR/SRR042/SRR042449/SRR042449.sra	SRX020043	GSM539841: mouse B cells activated in vitro with LPS/IL4 replicate 2 [09-002]	RNA-Seq	size fractionation	TRANSCRIPTOMIC	SINGLE	0	ILLUMINA	Illumina Genome Analyzer II	SRP002412	GEO Series accession: GSE21630	20605486	127103	SRS066226		10090	Mus musculus	Mus musculus	SRA012686	public	NO
SRR042450	2010-06-07 10:08:23	9041648	325499328	36	344		unspecified	ftp://ftp-private.ncbi.nlm.nih.gov/sra/sra-instant/reads/ByRun/sra/SRR/SRR042/SRR042450/SRR042450.sra	SRX020044	GSM539842: mouse B cells activated in vitro with LPS/IL4 replicate 3 [09-002]	RNA-Seq	size fractionation	TRANSCRIPTOMIC	SINGLE	0	ILLUMINA	Illumina Genome Analyzer II	SRP002412	GEO Series accession: GSE21630	20605486	127103	SRS066227		10090	Mus musculus	Mus musculus	SRA012686	public	NO
SRR042451	2010-06-07 10:08:23	3803505	121712160	32	130		unspecified	ftp://ftp-private.ncbi.nlm.nih.gov/sra/sra-instant/reads/ByRun/sra/SRR/SRR042/SRR042451/SRR042451.sra	SRX020045	GSM539843: mouse B cells activated in vitro with LPS/aIgD-Dextran [09-002]	RNA-Seq	size fractionation	TRANSCRIPTOMIC	SINGLE	0	ILLUMINA	Illumina Genome Analyzer II	SRP002412	GEO Series accession: GSE21630	20605486	127103	SRS066228		10090	Mus musculus	Mus musculus	SRA012686	public	NO
SRR042452	2010-06-07 10:08:23	5686415	170592450	30	184		unspecified	ftp://ftp-private.ncbi.nlm.nih.gov/sra/sra-instant/reads/ByRun/sra/SRR/SRR042/SRR042452/SRR042452.sra	SRX020046	GSM539844: mouse B1 B cells [09-002]	RNA-Seq	size fractionation	TRANSCRIPTOMIC	SINGLE	0	ILLUMINA	Illumina Genome Analyzer II	SRP002412	GEO Series accession: GSE21630	20605486	127103	SRS066229		10090	Mus musculus	Mus musculus	SRA012686	public	NO
SRR042453	2010-06-07 10:08:23	2893431	92589792	32	99		unspecified	ftp://ftp-private.ncbi.nlm.nih.gov/sra/sra-instant/reads/ByRun/sra/SRR/SRR042/SRR042453/SRR042453.sra	SRX020047	GSM539845: mouse marginal zone B cells (spleen) [09-002]	RNA-Seq	size fractionation	TRANSCRIPTOMIC	SINGLE	0	ILLUMINA	Illumina Genome Analyzer II	SRP002412	GEO Series accession: GSE21630	20605486	127103	SRS066230		10090	Mus musculus	Mus musculus	SRA012686	public	NO
SRR042454	2010-06-07 10:08:23	4416453	141326496	32	151		unspecified	ftp://ftp-private.ncbi.nlm.nih.gov/sra/sra-instant/reads/ByRun/sra/SRR/SRR042/SRR042454/SRR042454.sra	SRX020048	GSM539846: mouse germinal center B cells (lymph node) [09-002]	RNA-Seq	size fractionation	TRANSCRIPTOMIC	SINGLE	0	ILLUMINA	Illumina Genome Analyzer II	SRP002412	GEO Series accession: GSE21630	20605486	127103	SRS066231		10090	Mus musculus	Mus musculus	SRA012686	public	NO
SRR042455	2010-06-07 10:08:23	8351801	300664836	36	318		unspecified	ftp://ftp-private.ncbi.nlm.nih.gov/sra/sra-instant/reads/ByRun/sra/SRR/SRR042/SRR042455/SRR042455.sra	SRX020049	GSM539847: mouse plasma cells [09-002]	RNA-Seq	size fractionation	TRANSCRIPTOMIC	SINGLE	0	ILLUMINA	Illumina Genome Analyzer II	SRP002412	GEO Series accession: GSE21630	20605486	127103	SRS066232		10090	Mus musculus	Mus musculus	SRA012686	public	NO
SRR042456	2010-06-07 10:08:23	4715450	141463500	30	152		unspecified	ftp://ftp-private.ncbi.nlm.nih.gov/sra/sra-instant/reads/ByRun/sra/SRR/SRR042/SRR042456/SRR042456.sra	SRX020050	GSM539848: mouse hematopoetic progenitor cells [09-002]	RNA-Seq	size fractionation	TRANSCRIPTOMIC	SINGLE	0	ILLUMINA	Illumina Genome Analyzer II	SRP002412	GEO Series accession: GSE21630	20605486	127103	SRS066233		10090	Mus musculus	Mus musculus	SRA012686	public	NO
SRR042457	2010-06-07 10:08:23	5425138	162754140	30	175		unspecified	ftp://ftp-private.ncbi.nlm.nih.gov/sra/sra-instant/reads/ByRun/sra/SRR/SRR042/SRR042457/SRR042457.sra	SRX020051	GSM539849: mouse mast cells [09-002]	RNA-Seq	size fractionation	TRANSCRIPTOMIC	SINGLE	0	ILLUMINA	Illumina Genome Analyzer II	SRP002412	GEO Series accession: GSE21630	20605486	127103	SRS066234		10090	Mus musculus	Mus musculus	SRA012686	public	NO
SRR042458	2010-06-07 10:08:23	10914648	392927328	36	416		unspecified	ftp://ftp-private.ncbi.nlm.nih.gov/sra/sra-instant/reads/ByRun/sra/SRR/SRR042/SRR042458/SRR042458.sra	SRX020052	GSM539850: mouse basophil cells [09-002]	RNA-Seq	size fractionation	TRANSCRIPTOMIC	SINGLE	0	ILLUMINA	Illumina Genome Analyzer II	SRP002412	GEO Series accession: GSE21630	20605486	127103	SRS066235		10090	Mus musculus	Mus musculus	SRA012686	public	NO
SRR042459	2010-06-07 10:08:23	7825151	281705436	36	298		unspecified	ftp://ftp-private.ncbi.nlm.nih.gov/sra/sra-instant/reads/ByRun/sra/SRR/SRR042/SRR042459/SRR042459.sra	SRX020053	GSM539851: mouse neutrophil cells replicate 1 [09-002]	RNA-Seq	size fractionation	TRANSCRIPTOMIC	SINGLE	0	ILLUMINA	Illumina Genome Analyzer II	SRP002412	GEO Series accession: GSE21630	20605486	127103	SRS066236		10090	Mus musculus	Mus musculus	SRA012686	public	NO
SRR042460	2010-06-07 10:08:23	2599032	93565152	36	99		unspecified	ftp://ftp-private.ncbi.nlm.nih.gov/sra/sra-instant/reads/ByRun/sra/SRR/SRR042/SRR042460/SRR042460.sra	SRX020054	GSM539852: mouse neutrophil cells replicate 2 [09-002]	RNA-Seq	size fractionation	TRANSCRIPTOMIC	SINGLE	0	ILLUMINA	Illumina Genome Analyzer II	SRP002412	GEO Series accession: GSE21630	20605486	127103	SRS066237		10090	Mus musculus	Mus musculus	SRA012686	public	NO
SRR042461	2010-06-07 10:08:23	3805700	114171000	30	123		unspecified	ftp://ftp-private.ncbi.nlm.nih.gov/sra/sra-instant/reads/ByRun/sra/SRR/SRR042/SRR042461/SRR042461.sra	SRX020055	GSM539853: mouse dendritic cells [09-002]	RNA-Seq	size fractionation	TRANSCRIPTOMIC	SINGLE	0	ILLUMINA	Illumina Genome Analyzer II	SRP002412	GEO Series accession: GSE21630	20605486	127103	SRS066238		10090	Mus musculus	Mus musculus	SRA012686	public	NO
SRR042462	2010-06-07 10:08:23	4089964	122698920	30	132		unspecified	ftp://ftp-private.ncbi.nlm.nih.gov/sra/sra-instant/reads/ByRun/sra/SRR/SRR042/SRR042462/SRR042462.sra	SRX020056	GSM539854: mouse macrophages [09-002]	RNA-Seq	size fractionation	TRANSCRIPTOMIC	SINGLE	0	ILLUMINA	Illumina Genome Analyzer II	SRP002412	GEO Series accession: GSE21630	20605486	127103	SRS066239		10090	Mus musculus	Mus musculus	SRA012686	public	NO
SRR042463	2010-06-07 10:08:23	5889944	176698320	30	190			ftp://ftp-private.ncbi.nlm.nih.gov/sra/sra-instant/reads/ByRun/sra/SRR/SRR042/SRR042463/SRR042463.sra	SRX020057	GSM539855: mouse natural killer cells [09-002]	RNA-Seq	size fractionation	TRANSCRIPTOMIC	SINGLE	0	ILLUMINA	Illumina Genome Analyzer II	SRP002412	GEO Series accession: GSE21630	20605486	127103	SRS066240		10090	Mus musculus	Mus musculus	SRA012686	public	NO
SRR042464	2010-06-07 10:08:23	7355256	264789216	36	280		unspecified	ftp://ftp-private.ncbi.nlm.nih.gov/sra/sra-instant/reads/ByRun/sra/SRR/SRR042/SRR042464/SRR042464.sra	SRX020058	GSM539856: mouse CD4+CD8+ T cells (thymus) [09-002]	RNA-Seq	size fractionation	TRANSCRIPTOMIC	SINGLE	0	ILLUMINA	Illumina Genome Analyzer II	SRP002412	GEO Series accession: GSE21630	20605486	127103	SRS066241		10090	Mus musculus	Mus musculus	SRA012686	public	NO
SRR042465	2010-06-07 10:08:23	7465108	268743888	36	284		unspecified	ftp://ftp-private.ncbi.nlm.nih.gov/sra/sra-instant/reads/ByRun/sra/SRR/SRR042/SRR042465/SRR042465.sra	SRX020059	GSM539857: mouse CD4+ T cells (spleen) [09-002]	RNA-Seq	size fractionation	TRANSCRIPTOMIC	SINGLE	0	ILLUMINA	Illumina Genome Analyzer II	SRP002412	GEO Series accession: GSE21630	20605486	127103	SRS066242		10090	Mus musculus	Mus musculus	SRA012686	public	NO
SRR042466	2010-06-07 10:08:23	8103934	291741624	36	309		unspecified	ftp://ftp-private.ncbi.nlm.nih.gov/sra/sra-instant/reads/ByRun/sra/SRR/SRR042/SRR042466/SRR042466.sra	SRX020060	GSM539858: mouse CD8+ T cells (spleen) [09-002]	RNA-Seq	size fractionation	TRANSCRIPTOMIC	SINGLE	0	ILLUMINA	Illumina Genome Analyzer II	SRP002412	GEO Series accession: GSE21630	20605486	127103	SRS066243		10090	Mus musculus	Mus musculus	SRA012686	public	NO
SRR042467	2010-06-07 10:08:23	6397768	166341968	26	183		unspecified	ftp://ftp-private.ncbi.nlm.nih.gov/sra/sra-instant/reads/ByRun/sra/SRR/SRR042/SRR042467/SRR042467.sra	SRX020061	GSM539859: mouse T cells activated in vitro with Concanavalin A [09-002]	RNA-Seq	size fractionation	TRANSCRIPTOMIC	SINGLE	0	ILLUMINA	Illumina Genome Analyzer II	SRP002412	GEO Series accession: GSE21630	20605486	127103	SRS066244		10090	Mus musculus	Mus musculus	SRA012686	public	NO
SRR042468	2010-06-07 10:08:23	8889148	320009328	36	339		unspecified	ftp://ftp-private.ncbi.nlm.nih.gov/sra/sra-instant/reads/ByRun/sra/SRR/SRR042/SRR042468/SRR042468.sra	SRX020062	GSM539860: mouse Th1 cells [09-002]	RNA-Seq	size fractionation	TRANSCRIPTOMIC	SINGLE	0	ILLUMINA	Illumina Genome Analyzer II	SRP002412	GEO Series accession: GSE21630	20605486	127103	SRS066245		10090	Mus musculus	Mus musculus	SRA012686	public	NO
SRR042469	2010-06-07 10:08:23	10298259	370737324	36	392		unspecified	ftp://ftp-private.ncbi.nlm.nih.gov/sra/sra-instant/reads/ByRun/sra/SRR/SRR042/SRR042469/SRR042469.sra	SRX020063	GSM539861: mouse Th2 cells [09-002]	RNA-Seq	size fractionation	TRANSCRIPTOMIC	SINGLE	0	ILLUMINA	Illumina Genome Analyzer II	SRP002412	GEO Series accession: GSE21630	20605486	127103	SRS066246		10090	Mus musculus	Mus musculus	SRA012686	public	NO
SRR042470	2010-06-07 10:08:23	8566186	308382696	36	326		unspecified	ftp://ftp-private.ncbi.nlm.nih.gov/sra/sra-instant/reads/ByRun/sra/SRR/SRR042/SRR042470/SRR042470.sra	SRX020064	GSM539862: mouse Th17 cells [09-002]	RNA-Seq	size fractionation	TRANSCRIPTOMIC	SINGLE	0	ILLUMINA	Illumina Genome Analyzer II	SRP002412	GEO Series accession: GSE21630	20605486	127103	SRS066247		10090	Mus musculus	Mus musculus	SRA012686	public	NO
SRR042471	2010-06-07 10:08:23	23147712	833317632	36	883		unspecified	ftp://ftp-private.ncbi.nlm.nih.gov/sra/sra-instant/reads/ByRun/sra/SRR/SRR042/SRR042471/SRR042471.sra	SRX020065	GSM539863: mouse TFHS cells [09-002]	RNA-Seq	size fractionation	TRANSCRIPTOMIC	SINGLE	0	ILLUMINA	Illumina Genome Analyzer II	SRP002412	GEO Series accession: GSE21630	20605486	127103	SRS066248		10090	Mus musculus	Mus musculus	SRA012686	public	NO
SRR042472	2010-06-07 10:08:23	8295500	298638000	36	316		unspecified	ftp://ftp-private.ncbi.nlm.nih.gov/sra/sra-instant/reads/ByRun/sra/SRR/SRR042/SRR042472/SRR042472.sra	SRX020066	GSM539864: mouse iTreg cells [09-002]	RNA-Seq	size fractionation	TRANSCRIPTOMIC	SINGLE	0	ILLUMINA	Illumina Genome Analyzer II	SRP002412	GEO Series accession: GSE21630	20605486	127103	SRS066249		10090	Mus musculus	Mus musculus	SRA012686	public	NO
SRR042473	2010-06-07 10:08:23	9573147	344633292	36	365		unspecified	ftp://ftp-private.ncbi.nlm.nih.gov/sra/sra-instant/reads/ByRun/sra/SRR/SRR042/SRR042473/SRR042473.sra	SRX020067	GSM539865: mouse nTreg cells [09-002]	RNA-Seq	size fractionation	TRANSCRIPTOMIC	SINGLE	0	ILLUMINA	Illumina Genome Analyzer II	SRP002412	GEO Series accession: GSE21630	20605486	127103	SRS066250		10090	Mus musculus	Mus musculus	SRA012686	public	NO
SRR042474	2010-06-07 10:08:23	7731329	278327844	36	294		unspecified	ftp://ftp-private.ncbi.nlm.nih.gov/sra/sra-instant/reads/ByRun/sra/SRR/SRR042/SRR042474/SRR042474.sra	SRX020068	GSM539866: mouse embryonic stem cells [09-002]	RNA-Seq	size fractionation	TRANSCRIPTOMIC	SINGLE	0	ILLUMINA	Illumina Genome Analyzer II	SRP002412	GEO Series accession: GSE21630	20605486	127103	SRS066251		10090	Mus musculus	Mus musculus	SRA012686	public	NO
SRR042475	2010-06-07 10:08:23	3878778	124120896	32	133		unspecified	ftp://ftp-private.ncbi.nlm.nih.gov/sra/sra-instant/reads/ByRun/sra/SRR/SRR042/SRR042475/SRR042475.sra	SRX020069	GSM539867: mouse embryonic fibroblast cells [09-002]	RNA-Seq	size fractionation	TRANSCRIPTOMIC	SINGLE	0	ILLUMINA	Illumina Genome Analyzer II	SRP002412	GEO Series accession: GSE21630	20605486	127103	SRS066252		10090	Mus musculus	Mus musculus	SRA012686	public	NO
SRR042476	2010-06-07 10:08:23	5536860	166105800	30	179		unspecified	ftp://ftp-private.ncbi.nlm.nih.gov/sra/sra-instant/reads/ByRun/sra/SRR/SRR042/SRR042476/SRR042476.sra	SRX020070	GSM539868: mouse heart tissue [09-002]	RNA-Seq	size fractionation	TRANSCRIPTOMIC	SINGLE	0	ILLUMINA	Illumina Genome Analyzer II	SRP002412	GEO Series accession: GSE21630	20605486	127103	SRS066253		10090	Mus musculus	Mus musculus	SRA012686	public	NO
SRR042477	2010-06-07 10:08:23	6656045	199681350	30	215		unspecified	ftp://ftp-private.ncbi.nlm.nih.gov/sra/sra-instant/reads/ByRun/sra/SRR/SRR042/SRR042477/SRR042477.sra	SRX020071	GSM539869: mouse brain tissue [09-002]	RNA-Seq	size fractionation	TRANSCRIPTOMIC	SINGLE	0	ILLUMINA	Illumina Genome Analyzer II	SRP002412	GEO Series accession: GSE21630	20605486	127103	SRS066254		10090	Mus musculus	Mus musculus	SRA012686	public	NO
SRR042478	2010-06-07 10:08:23	6955243	208657290	30	225		unspecified	ftp://ftp-private.ncbi.nlm.nih.gov/sra/sra-instant/reads/ByRun/sra/SRR/SRR042/SRR042478/SRR042478.sra	SRX020072	GSM539870: mouse lung tissue [09-002]	RNA-Seq	size fractionation	TRANSCRIPTOMIC	SINGLE	0	ILLUMINA	Illumina Genome Analyzer II	SRP002412	GEO Series accession: GSE21630	20605486	127103	SRS066255		10090	Mus musculus	Mus musculus	SRA012686	public	NO
SRR042479	2010-06-07 10:08:23	6268017	188040510	30	203		unspecified	ftp://ftp-private.ncbi.nlm.nih.gov/sra/sra-instant/reads/ByRun/sra/SRR/SRR042/SRR042479/SRR042479.sra	SRX020073	GSM539871: mouse liver tissue [09-002]	RNA-Seq	size fractionation	TRANSCRIPTOMIC	SINGLE	0	ILLUMINA	Illumina Genome Analyzer II	SRP002412	GEO Series accession: GSE21630	20605486	127103	SRS066256		10090	Mus musculus	Mus musculus	SRA012686	public	NO
SRR042480	2010-06-07 10:08:23	6790959	203728770	30	220		unspecified	ftp://ftp-private.ncbi.nlm.nih.gov/sra/sra-instant/reads/ByRun/sra/SRR/SRR042/SRR042480/SRR042480.sra	SRX020074	GSM539872: mouse kidney tissue [09-002]	RNA-Seq	size fractionation	TRANSCRIPTOMIC	SINGLE	0	ILLUMINA	Illumina Genome Analyzer II	SRP002412	GEO Series accession: GSE21630	20605486	127103	SRS066257		10090	Mus musculus	Mus musculus	SRA012686	public	NO
SRR042481	2010-06-07 10:08:23	4491760	134752800	30	145		unspecified	ftp://ftp-private.ncbi.nlm.nih.gov/sra/sra-instant/reads/ByRun/sra/SRR/SRR042/SRR042481/SRR042481.sra	SRX020075	GSM539873: mouse pancreatic tissue [09-002]	RNA-Seq	size fractionation	TRANSCRIPTOMIC	SINGLE	0	ILLUMINA	Illumina Genome Analyzer II	SRP002412	GEO Series accession: GSE21630	20605486	127103	SRS066258		10090	Mus musculus	Mus musculus	SRA012686	public	NO
SRR042482	2010-06-07 10:08:23	6633799	238816764	36	253		unspecified	ftp://ftp-private.ncbi.nlm.nih.gov/sra/sra-instant/reads/ByRun/sra/SRR/SRR042/SRR042482/SRR042482.sra	SRX020076	GSM539874: mouse skin tissue [09-002]	RNA-Seq	size fractionation	TRANSCRIPTOMIC	SINGLE	0	ILLUMINA	Illumina Genome Analyzer II	SRP002412	GEO Series accession: GSE21630	20605486	127103	SRS066259		10090	Mus musculus	Mus musculus	SRA012686	public	NO
SRR042483	2010-06-07 10:08:23	7696566	277076376	36	293		unspecified	ftp://ftp-private.ncbi.nlm.nih.gov/sra/sra-instant/reads/ByRun/sra/SRR/SRR042/SRR042483/SRR042483.sra	SRX020077	GSM539875: mouse muscle tissue [09-002]	RNA-Seq	size fractionation	TRANSCRIPTOMIC	SINGLE	0	ILLUMINA	Illumina Genome Analyzer II	SRP002412	GEO Series accession: GSE21630	20605486	127103	SRS066260		10090	Mus musculus	Mus musculus	SRA012686	public	NO
SRR042484	2010-06-07 10:08:23	7132321	256763556	36	272		unspecified	ftp://ftp-private.ncbi.nlm.nih.gov/sra/sra-instant/reads/ByRun/sra/SRR/SRR042/SRR042484/SRR042484.sra	SRX020078	GSM539876: mouse salivary gland tissue [09-002]	RNA-Seq	size fractionation	TRANSCRIPTOMIC	SINGLE	0	ILLUMINA	Illumina Genome Analyzer II	SRP002412	GEO Series accession: GSE21630	20605486	127103	SRS066261		10090	Mus musculus	Mus musculus	SRA012686	public	NO
SRR042485	2010-06-07 10:08:23	3151281	94538430	30	102		unspecified	ftp://ftp-private.ncbi.nlm.nih.gov/sra/sra-instant/reads/ByRun/sra/SRR/SRR042/SRR042485/SRR042485.sra	SRX020079	GSM539877: mouse testicular tissue [09-002]	RNA-Seq	size fractionation	TRANSCRIPTOMIC	SINGLE	0	ILLUMINA	Illumina Genome Analyzer II	SRP002412	GEO Series accession: GSE21630	20605486	127103	SRS066262		10090	Mus musculus	Mus musculus	SRA012686	public	NO
SRR042486	2010-06-07 10:08:23	4815084	144452520	30	156		unspecified	ftp://ftp-private.ncbi.nlm.nih.gov/sra/sra-instant/reads/ByRun/sra/SRR/SRR042/SRR042486/SRR042486.sra	SRX020080	GSM539878: mouse ovaries [09-002]	RNA-Seq	size fractionation	TRANSCRIPTOMIC	SINGLE	0	ILLUMINA	Illumina Genome Analyzer II	SRP002412	GEO Series accession: GSE21630	20605486	127103	SRS066263		10090	Mus musculus	Mus musculus	SRA012686	public	NO
SRR042487	2010-06-07 10:08:23	5865234	211148424	36	223			ftp://ftp-private.ncbi.nlm.nih.gov/sra/sra-instant/reads/ByRun/sra/SRR/SRR042/SRR042487/SRR042487.sra	SRX020081	GSM539879: mouse BclXL B activated with LPS/IL4 [BalbC] [09-002]	RNA-Seq	size fractionation	TRANSCRIPTOMIC	SINGLE	0	ILLUMINA	Illumina Genome Analyzer II	SRP002412	GEO Series accession: GSE21630	20605486	127103	SRS066264		10090	Mus musculus	Mus musculus	SRA012686	public	NO
SRR042488	2010-06-07 10:08:23	11711466	421612776	36	446		unspecified	ftp://ftp-private.ncbi.nlm.nih.gov/sra/sra-instant/reads/ByRun/sra/SRR/SRR042/SRR042488/SRR042488.sra	SRX020082	GSM539880: mouse BclXL germinal center B cells [BalbC] [09-002]	RNA-Seq	size fractionation	TRANSCRIPTOMIC	SINGLE	0	ILLUMINA	Illumina Genome Analyzer II	SRP002412	GEO Series accession: GSE21630	20605486	127103	SRS066265		10090	Mus musculus	Mus musculus	SRA012686	public	NO
SRR051939	2010-06-14 09:46:20	2798220	100735920	36	106			ftp://ftp-private.ncbi.nlm.nih.gov/sra/sra-instant/reads/ByRun/sra/SRR/SRR051/SRR051939/SRR051939.sra	SRX021364	GSM545783: Mov10L1-associated piRNAs	RNA-Seq	size fractionation	TRANSCRIPTOMIC	SINGLE	0	ILLUMINA	Illumina Genome Analyzer	SRP002529	GEO Series accession: GSE21763	20534472	127279	SRS074097		10090	Mus musculus	Mus musculus	SRA018980	public	NO
SRR051940	2010-06-14 09:46:20	6176821	222365556	36	235		unspecified	ftp://ftp-private.ncbi.nlm.nih.gov/sra/sra-instant/reads/ByRun/sra/SRR/SRR051/SRR051940/SRR051940.sra	SRX021365	GSM545784: 18-32 nt total small RNAs (Mov10l+/-)	RNA-Seq	size fractionation	TRANSCRIPTOMIC	SINGLE	0	ILLUMINA	Illumina Genome Analyzer	SRP002529	GEO Series accession: GSE21763	20534472	127279	SRS074098		10090	Mus musculus	Mus musculus	SRA018980	public	NO
SRR051941	2010-06-14 09:46:20	4991994	179711784	36	190		unspecified	ftp://ftp-private.ncbi.nlm.nih.gov/sra/sra-instant/reads/ByRun/sra/SRR/SRR051/SRR051941/SRR051941.sra	SRX021366	GSM545785: 18-32 nt total small RNAs (Mov10l-/-)	RNA-Seq	size fractionation	TRANSCRIPTOMIC	SINGLE	0	ILLUMINA	Illumina Genome Analyzer	SRP002529	GEO Series accession: GSE21763	20534472	127279	SRS074099		10090	Mus musculus	Mus musculus	SRA018980	public	NO
SRR065544	2010-11-08 15:16:47	8405927	588414890	70	593		unspecified	ftp://ftp-private.ncbi.nlm.nih.gov/sra/sra-instant/reads/ByRun/sra/SRR/SRR065/SRR065544/SRR065544.sra	SRX026630	GSM582290: c2c12_lko_100	RNA-Seq	other	TRANSCRIPTOMIC	PAIRED	98	ILLUMINA	Illumina Genome Analyzer	SRP003495	GEO Series accession: GSE23694	21057496	130865	SRS114705		10090	Mus musculus	Mus musculus	SRA023847	public	NO
SRR065545	2010-11-08 15:16:47	11506778	805474460	70	812		unspecified	ftp://ftp-private.ncbi.nlm.nih.gov/sra/sra-instant/reads/ByRun/sra/SRR/SRR065/SRR065545/SRR065545.sra	SRX026631	GSM582293: c2c12_cugbp1_100	RNA-Seq	other	TRANSCRIPTOMIC	PAIRED	99	ILLUMINA	Illumina Genome Analyzer	SRP003495	GEO Series accession: GSE23694	21057496	130865	SRS114706		10090	Mus musculus	Mus musculus	SRA023847	public	YES
SRR065546	2010-11-08 15:16:47	4193542	293547940	70	295		unspecified	ftp://ftp-private.ncbi.nlm.nih.gov/sra/sra-instant/reads/ByRun/sra/SRR/SRR065/SRR065546/SRR065546.sra	SRX026632	GSM582295: c2c12_lko_280	RNA-Seq	other	TRANSCRIPTOMIC	PAIRED	277	ILLUMINA	Illumina Genome Analyzer	SRP003495	GEO Series accession: GSE23694	21057496	130865	SRS114707		10090	Mus musculus	Mus musculus	SRA023847	public	NO
SRR065547	2010-11-08 15:16:47	3854036	269782520	70	272		unspecified	ftp://ftp-private.ncbi.nlm.nih.gov/sra/sra-instant/reads/ByRun/sra/SRR/SRR065/SRR065547/SRR065547.sra	SRX026633	GSM582297: c2c12_cugbp1_280	RNA-Seq	other	TRANSCRIPTOMIC	PAIRED	282	ILLUMINA	Illumina Genome Analyzer	SRP003495	GEO Series accession: GSE23694	21057496	130865	SRS114708		10090	Mus musculus	Mus musculus	SRA023847	public	NO
SRR069809	2011-06-10 10:07:56	8679962	347198480	40	364		unspecified	ftp://ftp-private.ncbi.nlm.nih.gov/sra/sra-instant/reads/ByRun/sra/SRR/SRR069/SRR069809/SRR069809.sra	SRX029052	GSM610965: Type A spermatogonia	RNA-Seq	size fractionation	TRANSCRIPTOMIC	SINGLE	0	ILLUMINA	Illumina Genome Analyzer	SRP003871	GEO Series accession: GSE24822	21602304	131953	SRS117881		10090	Mus musculus	Mus musculus	SRA025058	public	NO
SRR069810	2011-06-10 10:07:56	9207346	368293840	40	386		unspecified	ftp://ftp-private.ncbi.nlm.nih.gov/sra/sra-instant/reads/ByRun/sra/SRR/SRR069/SRR069810/SRR069810.sra	SRX029053	GSM610966: Pachytene spermatocytes	RNA-Seq	size fractionation	TRANSCRIPTOMIC	SINGLE	0	ILLUMINA	Illumina Genome Analyzer	SRP003871	GEO Series accession: GSE24822	21602304	131953	SRS117882		10090	Mus musculus	Mus musculus	SRA025058	public	NO
SRR069811	2011-06-10 10:07:56	8309991	332399640	40	348		unspecified	ftp://ftp-private.ncbi.nlm.nih.gov/sra/sra-instant/reads/ByRun/sra/SRR/SRR069/SRR069811/SRR069811.sra	SRX029054	GSM610967: Round spermatids	RNA-Seq	size fractionation	TRANSCRIPTOMIC	SINGLE	0	ILLUMINA	Illumina Genome Analyzer	SRP003871	GEO Series accession: GSE24822	21602304	131953	SRS117883		10090	Mus musculus	Mus musculus	SRA025058	public	NO
SRR072951	2011-01-14 14:17:25	9098036	354823404	39	373		unspecified	ftp://ftp-private.ncbi.nlm.nih.gov/sra/sra-instant/reads/ByRun/sra/SRR/SRR072/SRR072951/SRR072951.sra	SRX031189	GSM622570: WT1A	RNA-Seq	other	TRANSCRIPTOMIC	SINGLE	0	ILLUMINA	Illumina Genome Analyzer II	SRP004448	GEO Series accession: GSE25310	21258322	134881	SRS121271		10090	Mus musculus	Mus musculus	SRA026475	public	NO
SRR072952	2011-01-14 14:17:25	5667749	221042211	39	232		unspecified	ftp://ftp-private.ncbi.nlm.nih.gov/sra/sra-instant/reads/ByRun/sra/SRR/SRR072/SRR072952/SRR072952.sra	SRX031190	GSM622571: WT1B	RNA-Seq	other	TRANSCRIPTOMIC	SINGLE	0	ILLUMINA	Illumina Genome Analyzer II	SRP004448	GEO Series accession: GSE25310	21258322	134881	SRS121272		10090	Mus musculus	Mus musculus	SRA026475	public	NO
SRR072953	2011-01-14 14:17:25	9739992	379859688	39	399		unspecified	ftp://ftp-private.ncbi.nlm.nih.gov/sra/sra-instant/reads/ByRun/sra/SRR/SRR072/SRR072953/SRR072953.sra	SRX031191	GSM622572: WT2	RNA-Seq	other	TRANSCRIPTOMIC	SINGLE	0	ILLUMINA	Illumina Genome Analyzer II	SRP004448	GEO Series accession: GSE25310	21258322	134881	SRS121273		10090	Mus musculus	Mus musculus	SRA026475	public	NO
SRR072954	2011-01-14 14:17:25	3413865	136554600	40	143		unspecified	ftp://ftp-private.ncbi.nlm.nih.gov/sra/sra-instant/reads/ByRun/sra/SRR/SRR072/SRR072954/SRR072954.sra	SRX031192	GSM622573: KO1	RNA-Seq	other	TRANSCRIPTOMIC	SINGLE	0	ILLUMINA	Illumina Genome Analyzer II	SRP004448	GEO Series accession: GSE25310	21258322	134881	SRS121274		10090	Mus musculus	Mus musculus	SRA026475	public	NO
SRR072955	2011-01-14 14:17:25	7209770	281181030	39	295		unspecified	ftp://ftp-private.ncbi.nlm.nih.gov/sra/sra-instant/reads/ByRun/sra/SRR/SRR072/SRR072955/SRR072955.sra	SRX031193	GSM622574: KO2	RNA-Seq	other	TRANSCRIPTOMIC	SINGLE	0	ILLUMINA	Illumina Genome Analyzer II	SRP004448	GEO Series accession: GSE25310	21258322	134881	SRS121275		10090	Mus musculus	Mus musculus	SRA026475	public	NO
SRR072956	2011-01-14 14:17:25	8074815	290693340	36	308		unspecified	ftp://ftp-private.ncbi.nlm.nih.gov/sra/sra-instant/reads/ByRun/sra/SRR/SRR072/SRR072956/SRR072956.sra	SRX031194	GSM622575: TR	RNA-Seq	other	TRANSCRIPTOMIC	SINGLE	0	ILLUMINA	Illumina Genome Analyzer II	SRP004448	GEO Series accession: GSE25310	21258322	134881	SRS121276		10090	Mus musculus	Mus musculus	SRA026475	public	NO
SRR073089	2011-04-29 09:07:18	33459655	5085867560	152	4977		unspecified	ftp://ftp-private.ncbi.nlm.nih.gov/sra/sra-instant/reads/ByRun/sra/SRR/SRR073/SRR073089/SRR073089.sra	SRX031249	GSM624282: 4sU_DCs_0h_RNASeq	RNA-Seq	cDNA	TRANSCRIPTOMIC	PAIRED	77	ILLUMINA	Illumina Genome Analyzer II	SRP004456	GEO Series accession: GSE25432	21516085	133787	SRS121328		10090	Mus musculus	Mus musculus	SRA026486	public	NO
SRR073090	2011-04-29 09:07:18	33866547	5147715144	152	5038		unspecified	ftp://ftp-private.ncbi.nlm.nih.gov/sra/sra-instant/reads/ByRun/sra/SRR/SRR073/SRR073090/SRR073090.sra	SRX031250	GSM624283: 4sU_DCs_1h_RNASeq	RNA-Seq	cDNA	TRANSCRIPTOMIC	PAIRED	77	ILLUMINA	Illumina Genome Analyzer II	SRP004456	GEO Series accession: GSE25432	21516085	133787	SRS121329		10090	Mus musculus	Mus musculus	SRA026486	public	NO
SRR073091	2011-04-29 09:07:18	34970264	5315480128	152	5202		unspecified	ftp://ftp-private.ncbi.nlm.nih.gov/sra/sra-instant/reads/ByRun/sra/SRR/SRR073/SRR073091/SRR073091.sra	SRX031251	GSM624284: 4sU_DCs_3h_RNASeq	RNA-Seq	cDNA	TRANSCRIPTOMIC	PAIRED	77	ILLUMINA	Illumina Genome Analyzer II	SRP004456	GEO Series accession: GSE25432	21516085	133787	SRS121330		10090	Mus musculus	Mus musculus	SRA026486	public	NO
SRR073092	2011-04-29 09:07:18	33204371	5047064392	152	4939		unspecified	ftp://ftp-private.ncbi.nlm.nih.gov/sra/sra-instant/reads/ByRun/sra/SRR/SRR073/SRR073092/SRR073092.sra	SRX031252	GSM624285: 4sU_DCs_4h_RNASeq	RNA-Seq	cDNA	TRANSCRIPTOMIC	PAIRED	77	ILLUMINA	Illumina Genome Analyzer II	SRP004456	GEO Series accession: GSE25432	21516085	133787	SRS121331		10090	Mus musculus	Mus musculus	SRA026486	public	NO
SRR073093	2011-04-29 09:07:18	33995578	5167327856	152	5057		unspecified	ftp://ftp-private.ncbi.nlm.nih.gov/sra/sra-instant/reads/ByRun/sra/SRR/SRR073/SRR073093/SRR073093.sra	SRX031253	GSM624286: 4sU_DCs_5h_RNASeq	RNA-Seq	cDNA	TRANSCRIPTOMIC	PAIRED	77	ILLUMINA	Illumina Genome Analyzer II	SRP004456	GEO Series accession: GSE25432	21516085	133787	SRS121332		10090	Mus musculus	Mus musculus	SRA026486	public	NO
SRR073094	2011-04-29 09:07:18	34860453	5298788856	152	5186		unspecified	ftp://ftp-private.ncbi.nlm.nih.gov/sra/sra-instant/reads/ByRun/sra/SRR/SRR073/SRR073094/SRR073094.sra	SRX031254	GSM624287: 4sU_DCs_6h_RNASeq	RNA-Seq	cDNA	TRANSCRIPTOMIC	PAIRED	77	ILLUMINA	Illumina Genome Analyzer II	SRP004456	GEO Series accession: GSE25432	21516085	133787	SRS121333		10090	Mus musculus	Mus musculus	SRA026486	public	NO
SRR116846	2011-06-03 12:44:54	23002622	920104880	40	549		unspecified	ftp://ftp-private.ncbi.nlm.nih.gov/sra/sra-instant/reads/ByRun/sra/SRR/SRR116/SRR116846/SRR116846.sra	SRX046108	GSM678422: Small RNA from mouse epididymis	RNA-Seq	size fractionation	TRANSCRIPTOMIC	SINGLE	0	ILLUMINA	Illumina Genome Analyzer II	SRP005938	GEO Series accession: GSE27369	21546553	137293	SRS173564		10090	Mus musculus	Mus musculus	SRA030434	public	NO
SRR149235	2011-03-31 17:31:02	27011235	972404460	36	1031			ftp://ftp-private.ncbi.nlm.nih.gov/sra/sra-instant/reads/ByRun/sra/SRR/SRR149/SRR149235/SRR149235.sra	SRX052088	newly_synthesized	RNA-Seq	cDNA	TRANSCRIPTOMIC	SINGLE	0	ILLUMINA	Illumina Genome Analyzer IIx	SRP006165	RNA_halflife_3t3	21593866	80021	SRS183257		10090	Mus musculus	newly_synthesized	SRA030871	public	YES
SRR149236	2011-03-31 22:24:02	26937010	969732360	36	1028			ftp://ftp-private.ncbi.nlm.nih.gov/sra/sra-instant/reads/ByRun/sra/SRR/SRR149/SRR149236/SRR149236.sra	SRX052092	preexising RNA	RNA-Seq	cDNA	TRANSCRIPTOMIC	SINGLE	0	ILLUMINA	Illumina Genome Analyzer IIx	SRP006165	RNA_halflife_3t3	21593866	80021	SRS183258		10090	Mus musculus	preexisting_RNA	SRA030871	public	YES
SRR149237	2011-03-31 22:52:01	26761116	963400176	36	1021			ftp://ftp-private.ncbi.nlm.nih.gov/sra/sra-instant/reads/ByRun/sra/SRR/SRR149/SRR149237/SRR149237.sra	SRX052093	bulk_RNA	RNA-Seq	cDNA	TRANSCRIPTOMIC	SINGLE	0	ILLUMINA	Illumina Genome Analyzer IIx	SRP006165	RNA_halflife_3t3	21593866	80021	SRS183259		10090	Mus musculus	bulk_RNA	SRA030871	public	YES
SRR187792	2011-04-21 12:04:47	16445455	674263655	41	459		unspecified	ftp://ftp-private.ncbi.nlm.nih.gov/sra/sra-instant/reads/ByRun/sra/SRR/SRR187/SRR187792/SRR187792.sra	SRX057856	GSM710183: Th2_rep1	RNA-Seq	cDNA	TRANSCRIPTOMIC	SINGLE	0	ILLUMINA	Illumina Genome Analyzer IIx	SRP006435	GEO Series accession: GSE28666	21654674	138875	SRS188802		10090	Mus musculus	Mus musculus	SRA035390	public	YES
SRR187793	2011-04-21 12:04:47	26408070	950690520	36	474		unspecified	ftp://ftp-private.ncbi.nlm.nih.gov/sra/sra-instant/reads/ByRun/sra/SRR/SRR187/SRR187793/SRR187793.sra	SRX057857	GSM710184: Th2_rep2	RNA-Seq	cDNA	TRANSCRIPTOMIC	SINGLE	0	ILLUMINA	Illumina Genome Analyzer IIx	SRP006435	GEO Series accession: GSE28666	21654674	138875	SRS188803		10090	Mus musculus	Mus musculus	SRA035390	public	YES
SRR248523	2011-07-20 14:00:59	13308709	479113524	36	373		unspecified	ftp://ftp-private.ncbi.nlm.nih.gov/sra/sra-instant/reads/ByRun/sra/SRR/SRR248/SRR248523/SRR248523.sra	SRX072641	GSM733811: Thy1+ SSC-enriched rep1	RNA-Seq	size fractionation	TRANSCRIPTOMIC	SINGLE	0	ILLUMINA	Illumina Genome Analyzer II	SRP006999	GEO Series accession: GSE29613	21768389	141359	SRS211666		10090		Mus musculus	SRA037734	public	NO
SRR248524	2011-07-20 14:00:59	13377944	481605984	36	380		unspecified	ftp://ftp-private.ncbi.nlm.nih.gov/sra/sra-instant/reads/ByRun/sra/SRR/SRR248/SRR248524/SRR248524.sra	SRX072642	GSM733812: Thy1+ SSC-enriched rep2	RNA-Seq	size fractionation	TRANSCRIPTOMIC	SINGLE	0	ILLUMINA	Illumina Genome Analyzer II	SRP006999	GEO Series accession: GSE29613	21768389	141359	SRS211667		10090		Mus musculus	SRA037734	public	NO
SRR248525	2011-07-20 14:00:59	12187101	438735636	36	341		unspecified	ftp://ftp-private.ncbi.nlm.nih.gov/sra/sra-instant/reads/ByRun/sra/SRR/SRR248/SRR248525/SRR248525.sra	SRX072643	GSM733813: Thy1- Somatic-enriched rep1	RNA-Seq	size fractionation	TRANSCRIPTOMIC	SINGLE	0	ILLUMINA	Illumina Genome Analyzer II	SRP006999	GEO Series accession: GSE29613	21768389	141359	SRS211668		10090		Mus musculus	SRA037734	public	NO
SRR248526	2011-07-20 14:00:59	13831811	497945196	36	402		unspecified	ftp://ftp-private.ncbi.nlm.nih.gov/sra/sra-instant/reads/ByRun/sra/SRR/SRR248/SRR248526/SRR248526.sra	SRX072644	GSM733814: Thy1- Somatic-enriched rep2	RNA-Seq	size fractionation	TRANSCRIPTOMIC	SINGLE	0	ILLUMINA	Illumina Genome Analyzer II	SRP006999	GEO Series accession: GSE29613	21768389	141359	SRS211669		10090		Mus musculus	SRA037734	public	NO
SRR248527	2011-07-20 14:00:59	13705590	493401240	36	390		unspecified	ftp://ftp-private.ncbi.nlm.nih.gov/sra/sra-instant/reads/ByRun/sra/SRR/SRR248/SRR248527/SRR248527.sra	SRX072645	GSM733815: SSC-enriched germ cell culture 1	RNA-Seq	size fractionation	TRANSCRIPTOMIC	SINGLE	0	ILLUMINA	Illumina Genome Analyzer II	SRP006999	GEO Series accession: GSE29613	21768389	141359	SRS211670		10090		Mus musculus	SRA037734	public	NO
SRR306526	2011-07-06 17:45:04	2286672	82320192	36	56		unspecified	ftp://ftp-private.ncbi.nlm.nih.gov/sra/sra-instant/reads/ByRun/sra/SRR/SRR306/SRR306526/SRR306526.sra	SRX081787	GSM750569: Cerebellum_1	RNA-Seq	size fractionation	TRANSCRIPTOMIC	SINGLE	0	ILLUMINA	Illumina Genome Analyzer II	SRP007405	GEO Series accession: GSE30286	0	143587	SRS213885		10090		Mus musculus	SRA039795	public	NO
SRR306527	2011-07-06 17:47:03	6343580	228368880	36	154		unspecified	ftp://ftp-private.ncbi.nlm.nih.gov/sra/sra-instant/reads/ByRun/sra/SRR/SRR306/SRR306527/SRR306527.sra	SRX081788	GSM750570: Cerebellum_2	RNA-Seq	size fractionation	TRANSCRIPTOMIC	SINGLE	0	ILLUMINA	Illumina Genome Analyzer II	SRP007405	GEO Series accession: GSE30286	0	143587	SRS213886		10090		Mus musculus	SRA039795	public	NO
SRR306528	2011-07-06 17:46:04	3091589	111297204	36	71		unspecified	ftp://ftp-private.ncbi.nlm.nih.gov/sra/sra-instant/reads/ByRun/sra/SRR/SRR306/SRR306528/SRR306528.sra	SRX081789	GSM750571: Cerebellum_3	RNA-Seq	size fractionation	TRANSCRIPTOMIC	SINGLE	0	ILLUMINA	Illumina Genome Analyzer II	SRP007405	GEO Series accession: GSE30286	0	143587	SRS213887		10090		Mus musculus	SRA039795	public	NO
SRR306529	2011-07-06 17:30:03	5493955	197782380	36	126		unspecified	ftp://ftp-private.ncbi.nlm.nih.gov/sra/sra-instant/reads/ByRun/sra/SRR/SRR306/SRR306529/SRR306529.sra	SRX081790	GSM750572: Purkinje_1	RNA-Seq	size fractionation	TRANSCRIPTOMIC	SINGLE	0	ILLUMINA	Illumina Genome Analyzer II	SRP007405	GEO Series accession: GSE30286	0	143587	SRS213888		10090		Mus musculus	SRA039795	public	NO
SRR306530	2011-07-06 17:30:03	6689600	240825600	36	151		unspecified	ftp://ftp-private.ncbi.nlm.nih.gov/sra/sra-instant/reads/ByRun/sra/SRR/SRR306/SRR306530/SRR306530.sra	SRX081791	GSM750573: Purkinje_2	RNA-Seq	size fractionation	TRANSCRIPTOMIC	SINGLE	0	ILLUMINA	Illumina Genome Analyzer II	SRP007405	GEO Series accession: GSE30286	0	143587	SRS213889		10090		Mus musculus	SRA039795	public	NO
SRR306531	2011-07-06 17:32:04	9592137	345316932	36	218		unspecified	ftp://ftp-private.ncbi.nlm.nih.gov/sra/sra-instant/reads/ByRun/sra/SRR/SRR306/SRR306531/SRR306531.sra	SRX081792	GSM750574: Purkinje_3	RNA-Seq	size fractionation	TRANSCRIPTOMIC	SINGLE	0	ILLUMINA	Illumina Genome Analyzer II	SRP007405	GEO Series accession: GSE30286	0	143587	SRS213890		10090		Mus musculus	SRA039795	public	NO
SRR306532	2011-07-06 17:37:03	26277696	945997056	36	384		unspecified	ftp://ftp-private.ncbi.nlm.nih.gov/sra/sra-instant/reads/ByRun/sra/SRR/SRR306/SRR306532/SRR306532.sra	SRX081793	GSM750575: Camk2a_1	RNA-Seq	size fractionation	TRANSCRIPTOMIC	SINGLE	0	ILLUMINA	Illumina Genome Analyzer II	SRP007405	GEO Series accession: GSE30286	0	143587	SRS213891		10090		Mus musculus	SRA039795	public	NO
SRR306533	2011-07-06 17:39:04	26888975	968003100	36	398		unspecified	ftp://ftp-private.ncbi.nlm.nih.gov/sra/sra-instant/reads/ByRun/sra/SRR/SRR306/SRR306533/SRR306533.sra	SRX081794	GSM750576: Camk2a_2	RNA-Seq	size fractionation	TRANSCRIPTOMIC	SINGLE	0	ILLUMINA	Illumina Genome Analyzer II	SRP007405	GEO Series accession: GSE30286	0	143587	SRS213892		10090		Mus musculus	SRA039795	public	NO
SRR306534	2011-07-06 17:41:03	24814139	893309004	36	338		unspecified	ftp://ftp-private.ncbi.nlm.nih.gov/sra/sra-instant/reads/ByRun/sra/SRR/SRR306/SRR306534/SRR306534.sra	SRX081795	GSM750577: Camk2a_3	RNA-Seq	size fractionation	TRANSCRIPTOMIC	SINGLE	0	ILLUMINA	Illumina Genome Analyzer II	SRP007405	GEO Series accession: GSE30286	0	143587	SRS213893		10090		Mus musculus	SRA039795	public	NO
SRR306535	2011-07-06 17:40:04	26529673	955068228	36	392		unspecified	ftp://ftp-private.ncbi.nlm.nih.gov/sra/sra-instant/reads/ByRun/sra/SRR/SRR306/SRR306535/SRR306535.sra	SRX081796	GSM750578: Gad2_1	RNA-Seq	size fractionation	TRANSCRIPTOMIC	SINGLE	0	ILLUMINA	Illumina Genome Analyzer II	SRP007405	GEO Series accession: GSE30286	0	143587	SRS213894		10090		Mus musculus	SRA039795	public	NO
SRR306536	2011-07-06 17:42:03	18829861	677874996	36	350		unspecified	ftp://ftp-private.ncbi.nlm.nih.gov/sra/sra-instant/reads/ByRun/sra/SRR/SRR306/SRR306536/SRR306536.sra	SRX081797	GSM750579: Gad2_2	RNA-Seq	size fractionation	TRANSCRIPTOMIC	SINGLE	0	ILLUMINA	Illumina Genome Analyzer II	SRP007405	GEO Series accession: GSE30286	0	143587	SRS213895		10090		Mus musculus	SRA039795	public	NO
SRR306537	2011-07-06 17:41:03	15109201	543931236	36	314		unspecified	ftp://ftp-private.ncbi.nlm.nih.gov/sra/sra-instant/reads/ByRun/sra/SRR/SRR306/SRR306537/SRR306537.sra	SRX081798	GSM750580: Gad2_3	RNA-Seq	size fractionation	TRANSCRIPTOMIC	SINGLE	0	ILLUMINA	Illumina Genome Analyzer II	SRP007405	GEO Series accession: GSE30286	0	143587	SRS213896		10090		Mus musculus	SRA039795	public	NO
SRR306538	2011-07-06 17:40:04	4660849	167790564	36	100		unspecified	ftp://ftp-private.ncbi.nlm.nih.gov/sra/sra-instant/reads/ByRun/sra/SRR/SRR306/SRR306538/SRR306538.sra	SRX081799	GSM750581: Neocortex_1	RNA-Seq	size fractionation	TRANSCRIPTOMIC	SINGLE	0	ILLUMINA	Illumina Genome Analyzer II	SRP007405	GEO Series accession: GSE30286	0	143587	SRS213897		10090		Mus musculus	SRA039795	public	NO
SRR306539	2011-07-06 17:41:03	9709176	349530336	36	209		unspecified	ftp://ftp-private.ncbi.nlm.nih.gov/sra/sra-instant/reads/ByRun/sra/SRR/SRR306/SRR306539/SRR306539.sra	SRX081800	GSM750582: Neocortex_2	RNA-Seq	size fractionation	TRANSCRIPTOMIC	SINGLE	0	ILLUMINA	Illumina Genome Analyzer II	SRP007405	GEO Series accession: GSE30286	0	143587	SRS213898		10090		Mus musculus	SRA039795	public	NO
SRR032476	2010-01-07 14:33:39	5995521	209843235	35	223		unspecified	ftp://ftp-private.ncbi.nlm.nih.gov/sra/sra-instant/reads/ByRun/sra/SRR/SRR032/SRR032476/SRR032476.sra	SRX015121	sRNA_delayed_deep_sequencing	RNA-Seq	RT-PCR	TRANSCRIPTOMIC	SINGLE	0	ILLUMINA	Illumina Genome Analyzer II	SRP001587	GEO Series accession: GSE19473	21124741	120351	SRS009509		10090	Mus musculus	Mus musculus	SRA010342	public	NO
SRR032477	2010-01-07 14:33:42	6333416	221669560	35	235		unspecified	ftp://ftp-private.ncbi.nlm.nih.gov/sra/sra-instant/reads/ByRun/sra/SRR/SRR032/SRR032477/SRR032477.sra	SRX015122	sRNA_activation_deep_sequencing	RNA-Seq	RT-PCR	TRANSCRIPTOMIC	SINGLE	0	ILLUMINA	Illumina Genome Analyzer II	SRP001587	GEO Series accession: GSE19473	21124741	120351	SRS009510		10090	Mus musculus	Mus musculus	SRA010342	public	NO
SRR032478	2010-01-07 14:34:48	11182568	391389880	35	415		unspecified	ftp://ftp-private.ncbi.nlm.nih.gov/sra/sra-instant/reads/ByRun/sra/SRR/SRR032/SRR032478/SRR032478.sra	SRX015123	mRNA_delayed_digital_gene_expression	RNA-Seq	RT-PCR	TRANSCRIPTOMIC	SINGLE	0	ILLUMINA	Illumina Genome Analyzer II	SRP001587	GEO Series accession: GSE19473	21124741	120351	SRS009511		10090	Mus musculus	Mus musculus	SRA010342	public	NO
SRR032479	2009-12-30 02:07:22	14012825	490448875	35	521		unspecified	ftp://ftp-private.ncbi.nlm.nih.gov/sra/sra-instant/reads/ByRun/sra/SRR/SRR032/SRR032479/SRR032479.sra	SRX015124	mRNA_activation_digital_gene_expression	RNA-Seq	RT-PCR	TRANSCRIPTOMIC	SINGLE	0	ILLUMINA	Illumina Genome Analyzer II	SRP001587	GEO Series accession: GSE19473	21124741	120351	SRS009512		10090	Mus musculus	Mus musculus	SRA010342	public	NO
SRR033657	2010-01-14 09:38:21	11743853	422778708	36	448			ftp://ftp-private.ncbi.nlm.nih.gov/sra/sra-instant/reads/ByRun/sra/SRR/SRR033/SRR033657/SRR033657.sra	SRX015660	Miwi-IP	RNA-Seq	size fractionation	TRANSCRIPTOMIC	SINGLE	0	ILLUMINA	Illumina Genome Analyzer II	SRP001701	GEO Series accession: GSE19172	20022248	120585	SRS009767		10090	Mus musculus	Mus musculus	SRA010773	public	NO
SRR033658	2010-01-14 09:39:37	12866614	463198104	36	490			ftp://ftp-private.ncbi.nlm.nih.gov/sra/sra-instant/reads/ByRun/sra/SRR/SRR033/SRR033658/SRR033658.sra	SRX015661	Mili-IP	RNA-Seq	size fractionation	TRANSCRIPTOMIC	SINGLE	0	ILLUMINA	Illumina Genome Analyzer II	SRP001701	GEO Series accession: GSE19172	20022248	120585	SRS009768		10090	Mus musculus	Mus musculus	SRA010773	public	NO
SRR033659	2010-01-14 09:40:33	13039474	469421064	36	497			ftp://ftp-private.ncbi.nlm.nih.gov/sra/sra-instant/reads/ByRun/sra/SRR/SRR033/SRR033659/SRR033659.sra	SRX015662	total RNA	RNA-Seq	size fractionation	TRANSCRIPTOMIC	SINGLE	0	ILLUMINA	Illumina Genome Analyzer II	SRP001701	GEO Series accession: GSE19172	20022248	120585	SRS009769		10090	Mus musculus	Mus musculus	SRA010773	public	NO
SRR039610	2011-03-23 10:02:00	10141719	365101884	36	386			ftp://ftp-private.ncbi.nlm.nih.gov/sra/sra-instant/reads/ByRun/sra/SRR/SRR039/SRR039610/SRR039610.sra	SRX018283	DICER_wt_hippocampus	RNA-Seq	size fractionation	TRANSCRIPTOMIC	SINGLE	0	ILLUMINA	Illumina Genome Analyzer II	SRP002171	GEO Series accession: GSE21090	21712401	126709	SRS041844		10090	Mus musculus	Mus musculus	SRA012310	public	NO
SRR038740	2011-03-23 10:02:00	3189673	114828228	36	121			ftp://ftp-private.ncbi.nlm.nih.gov/sra/sra-instant/reads/ByRun/sra/SRR/SRR038/SRR038740/SRR038740.sra	SRX018284	dicer_ko_hippocampus	RNA-Seq	size fractionation	TRANSCRIPTOMIC	SINGLE	0	ILLUMINA	Illumina Genome Analyzer II	SRP002171	GEO Series accession: GSE21090	21712401	126709	SRS041845		10090	Mus musculus	Mus musculus	SRA012310	public	NO
SRR038741	2011-03-23 10:02:00	7721256	277965216	36	294			ftp://ftp-private.ncbi.nlm.nih.gov/sra/sra-instant/reads/ByRun/sra/SRR/SRR038/SRR038741/SRR038741.sra	SRX018285	DGCR8_wt_hippocampus	RNA-Seq	size fractionation	TRANSCRIPTOMIC	SINGLE	0	ILLUMINA	Illumina Genome Analyzer II	SRP002171	GEO Series accession: GSE21090	21712401	126709	SRS041846		10090	Mus musculus	Mus musculus	SRA012310	public	NO
SRR038742	2011-03-23 10:02:00	20982886	755383896	36	800			ftp://ftp-private.ncbi.nlm.nih.gov/sra/sra-instant/reads/ByRun/sra/SRR/SRR038/SRR038742/SRR038742.sra	SRX018286	dgcr8_ko_hippocampus	RNA-Seq	size fractionation	TRANSCRIPTOMIC	SINGLE	0	ILLUMINA	Illumina Genome Analyzer II	SRP002171	GEO Series accession: GSE21090	21712401	126709	SRS041847		10090	Mus musculus	Mus musculus	SRA012310	public	NO
SRR038743	2011-03-23 10:02:00	7658262	275697432	36	292			ftp://ftp-private.ncbi.nlm.nih.gov/sra/sra-instant/reads/ByRun/sra/SRR/SRR038/SRR038743/SRR038743.sra	SRX018287	dicer_ko_cortex	RNA-Seq	size fractionation	TRANSCRIPTOMIC	SINGLE	0	ILLUMINA	Illumina Genome Analyzer II	SRP002171	GEO Series accession: GSE21090	21712401	126709	SRS041848		10090	Mus musculus	Mus musculus	SRA012310	public	NO
SRR038744	2011-03-23 10:02:00	12949489	466181604	36	493			ftp://ftp-private.ncbi.nlm.nih.gov/sra/sra-instant/reads/ByRun/sra/SRR/SRR038/SRR038744/SRR038744.sra	SRX018288	DGCR8_wt_cortex	RNA-Seq	size fractionation	TRANSCRIPTOMIC	SINGLE	0	ILLUMINA	Illumina Genome Analyzer II	SRP002171	GEO Series accession: GSE21090	21712401	126709	SRS041849		10090	Mus musculus	Mus musculus	SRA012310	public	NO
SRR038745	2011-03-23 10:02:00	3904820	140573520	36	148			ftp://ftp-private.ncbi.nlm.nih.gov/sra/sra-instant/reads/ByRun/sra/SRR/SRR038/SRR038745/SRR038745.sra	SRX018289	dgcr8_ko_cortex	RNA-Seq	size fractionation	TRANSCRIPTOMIC	SINGLE	0	ILLUMINA	Illumina Genome Analyzer II	SRP002171	GEO Series accession: GSE21090	21712401	126709	SRS041850		10090	Mus musculus	Mus musculus	SRA012310	public	NO
SRR039152	2011-01-03 10:27:34	14742382	530725752	36	764		unspecified	ftp://ftp-private.ncbi.nlm.nih.gov/sra/sra-instant/reads/ByRun/sra/SRR/SRR039/SRR039152/SRR039152.sra	SRX018666	GSM471929: HL1_siNon_smallRNAseq	RNA-Seq	size fractionation	TRANSCRIPTOMIC	SINGLE	0	ILLUMINA	Illumina Genome Analyzer	SRP002213	GEO Series accession: GSE19066	21379568	141689	SRS042000		10090	Mus musculus	Mus musculus	SRA012353	public	NO
SRR039153	2011-01-03 10:27:34	14911499	536813964	36	757		unspecified	ftp://ftp-private.ncbi.nlm.nih.gov/sra/sra-instant/reads/ByRun/sra/SRR/SRR039/SRR039153/SRR039153.sra	SRX018667	GSM471930: HL1_siSrf1_smallRNAseq	RNA-Seq	size fractionation	TRANSCRIPTOMIC	SINGLE	0	ILLUMINA	Illumina Genome Analyzer	SRP002213	GEO Series accession: GSE19066	21379568	141689	SRS042001		10090	Mus musculus	Mus musculus	SRA012353	public	NO
SRR039154	2011-01-03 10:27:34	14518157	522653652	36	670		unspecified	ftp://ftp-private.ncbi.nlm.nih.gov/sra/sra-instant/reads/ByRun/sra/SRR/SRR039/SRR039154/SRR039154.sra	SRX018668	GSM471931: HL1_siSrf2_smallRNAseq	RNA-Seq	size fractionation	TRANSCRIPTOMIC	SINGLE	0	ILLUMINA	Illumina Genome Analyzer	SRP002213	GEO Series accession: GSE19066	21379568	141689	SRS042002		10090	Mus musculus	Mus musculus	SRA012353	public	NO
SRR345544	2011-09-19 10:50:22	10504368	378157248	36	290		unspecified	ftp://ftp-private.ncbi.nlm.nih.gov/sra/sra-instant/reads/ByRun/sra/SRR/SRR345/SRR345544/SRR345544.sra	SRX097592	GSM797577: IgG control RIP-seq	RNA-Seq	cDNA	TRANSCRIPTOMIC	SINGLE	0	ILLUMINA	Illumina Genome Analyzer II	SRP002224	GEO Series accession: GSE17064	21172659	119843	SRS261405		10090		Mus musculus	SRA012365	public	NO
SRR039429	2011-11-23 14:47:05	13216436	475791696	36	504		unspecified	ftp://ftp-private.ncbi.nlm.nih.gov/sra/sra-instant/reads/ByRun/sra/SRR/SRR039/SRR039429/SRR039429.sra	SRX018860	GSM509277: Mili-/- E16.5 small RNA	RNA-Seq	size fractionation	TRANSCRIPTOMIC	SINGLE	0	ILLUMINA	Illumina Genome Analyzer II	SRP002253	GEO Series accession: GSE20327	20439430	125393	SRS058930		10090	Mus musculus	Mus musculus	SRA012402	public	NO
SRR039430	2011-11-23 14:47:05	5367621	193234356	36	204		unspecified	ftp://ftp-private.ncbi.nlm.nih.gov/sra/sra-instant/reads/ByRun/sra/SRR/SRR039/SRR039430/SRR039430.sra	SRX018861	GSM509278: Miwi2-/- E16.5 small RNA	RNA-Seq	size fractionation	TRANSCRIPTOMIC	SINGLE	0	ILLUMINA	Illumina Genome Analyzer II	SRP002253	GEO Series accession: GSE20327	20439430	125393	SRS058931		10090	Mus musculus	Mus musculus	SRA012402	public	NO
SRR039431	2011-11-23 14:47:05	6002494	216089784	36	228		unspecified	ftp://ftp-private.ncbi.nlm.nih.gov/sra/sra-instant/reads/ByRun/sra/SRR/SRR039/SRR039431/SRR039431.sra	SRX018862	GSM509279: MVH-/- E16.5 small RNA	RNA-Seq	size fractionation	TRANSCRIPTOMIC	SINGLE	0	ILLUMINA	Illumina Genome Analyzer II	SRP002253	GEO Series accession: GSE20327	20439430	125393	SRS058932		10090	Mus musculus	Mus musculus	SRA012402	public	NO
SRR327610	2011-09-16 16:41:34	7449478	268181208	36	174		unspecified	ftp://ftp-private.ncbi.nlm.nih.gov/sra/sra-instant/reads/ByRun/sra/SRR/SRR327/SRR327610/SRR327610.sra	SRX089340	GSM774078: 24_hr	RNA-Seq	size fractionation	TRANSCRIPTOMIC	SINGLE	0	ILLUMINA	Illumina Genome Analyzer II	SRP007668	GEO Series accession: GSE31225	21925387	146079	SRS255735		10090		Mus musculus	SRA043918	public	NO
SRR327611	2011-09-16 16:41:34	707202	25459272	36	17		unspecified	ftp://ftp-private.ncbi.nlm.nih.gov/sra/sra-instant/reads/ByRun/sra/SRR/SRR327/SRR327611/SRR327611.sra	SRX089341	GSM774079: 0_day	RNA-Seq	size fractionation	TRANSCRIPTOMIC	SINGLE	0	ILLUMINA	Illumina Genome Analyzer II	SRP007668	GEO Series accession: GSE31225	21925387	146079	SRS255736		10090		Mus musculus	SRA043918	public	NO
SRR327612	2011-09-16 16:41:34	763334	27480024	36	17		unspecified	ftp://ftp-private.ncbi.nlm.nih.gov/sra/sra-instant/reads/ByRun/sra/SRR/SRR327/SRR327612/SRR327612.sra	SRX089342	GSM774080: 3_day	RNA-Seq	size fractionation	TRANSCRIPTOMIC	SINGLE	0	ILLUMINA	Illumina Genome Analyzer II	SRP007668	GEO Series accession: GSE31225	21925387	146079	SRS255737		10090		Mus musculus	SRA043918	public	NO
SRR327613	2011-09-16 16:41:34	801593	28857348	36	18		unspecified	ftp://ftp-private.ncbi.nlm.nih.gov/sra/sra-instant/reads/ByRun/sra/SRR/SRR327/SRR327613/SRR327613.sra	SRX089343	GSM774081: 5_day	RNA-Seq	size fractionation	TRANSCRIPTOMIC	SINGLE	0	ILLUMINA	Illumina Genome Analyzer II	SRP007668	GEO Series accession: GSE31225	21925387	146079	SRS255738		10090		Mus musculus	SRA043918	public	NO
SRR349732	2012-01-02 09:57:02	8521211	306763596	36	232		unspecified	ftp://ftp-private.ncbi.nlm.nih.gov/sra/sra-instant/reads/ByRun/sra/SRR/SRR349/SRR349732/SRR349732.sra	SRX099119	GSM802669: R13, MILI IP, testes	RNA-Seq	size fractionation	TRANSCRIPTOMIC	SINGLE	0	ILLUMINA	Illumina Genome Analyzer II	SRP008495	GEO Series accession: GSE32435	0	147895	SRS265506		10090		Mus musculus	SRA046367	public	NO
SRR349733	2012-01-02 09:57:02	8884757	319851252	36	246		unspecified	ftp://ftp-private.ncbi.nlm.nih.gov/sra/sra-instant/reads/ByRun/sra/SRR/SRR349/SRR349733/SRR349733.sra	SRX099120	GSM802670: R13, MIWI IP, testes	RNA-Seq	size fractionation	TRANSCRIPTOMIC	SINGLE	0	ILLUMINA	Illumina Genome Analyzer II	SRP008495	GEO Series accession: GSE32435	0	147895	SRS265507		10090		Mus musculus	SRA046367	public	NO
SRR349734	2012-01-02 09:57:02	7830181	281886516	36	211		unspecified	ftp://ftp-private.ncbi.nlm.nih.gov/sra/sra-instant/reads/ByRun/sra/SRR/SRR349/SRR349734/SRR349734.sra	SRX099121	GSM802671: R13, total RNA, testes, 19-33 nt	RNA-Seq	size fractionation	TRANSCRIPTOMIC	SINGLE	0	ILLUMINA	Illumina Genome Analyzer II	SRP008495	GEO Series accession: GSE32435	0	147895	SRS265508		10090		Mus musculus	SRA046367	public	NO
SRR349735	2012-01-02 09:57:02	8098334	291540024	36	213		unspecified	ftp://ftp-private.ncbi.nlm.nih.gov/sra/sra-instant/reads/ByRun/sra/SRR/SRR349/SRR349735/SRR349735.sra	SRX099122	GSM802672: R37, MILI IP, testes	RNA-Seq	size fractionation	TRANSCRIPTOMIC	SINGLE	0	ILLUMINA	Illumina Genome Analyzer II	SRP008495	GEO Series accession: GSE32435	0	147895	SRS265509		10090		Mus musculus	SRA046367	public	NO
SRR349736	2012-01-02 09:57:02	8631186	310722696	36	230		unspecified	ftp://ftp-private.ncbi.nlm.nih.gov/sra/sra-instant/reads/ByRun/sra/SRR/SRR349/SRR349736/SRR349736.sra	SRX099123	GSM802673: R37, MIWI IP, testes	RNA-Seq	size fractionation	TRANSCRIPTOMIC	SINGLE	0	ILLUMINA	Illumina Genome Analyzer II	SRP008495	GEO Series accession: GSE32435	0	147895	SRS265510		10090		Mus musculus	SRA046367	public	NO
SRR349737	2012-01-02 09:57:02	8419872	303115392	36	227		unspecified	ftp://ftp-private.ncbi.nlm.nih.gov/sra/sra-instant/reads/ByRun/sra/SRR/SRR349/SRR349737/SRR349737.sra	SRX099124	GSM802674: R37, total RNA, testes, 19-33 nt	RNA-Seq	size fractionation	TRANSCRIPTOMIC	SINGLE	0	ILLUMINA	Illumina Genome Analyzer II	SRP008495	GEO Series accession: GSE32435	0	147895	SRS265511		10090		Mus musculus	SRA046367	public	NO
SRR349739	2012-01-02 09:57:02	7060329	254171844	36	204		unspecified	ftp://ftp-private.ncbi.nlm.nih.gov/sra/sra-instant/reads/ByRun/sra/SRR/SRR349/SRR349739/SRR349739.sra	SRX099126	GSM802676: wildtype MILI IP testes	RNA-Seq	size fractionation	TRANSCRIPTOMIC	SINGLE	0	ILLUMINA	Illumina Genome Analyzer II	SRP008495	GEO Series accession: GSE32435	0	147895	SRS265513		10090		Mus musculus	SRA046367	public	NO
SRR349740	2012-01-02 09:57:02	7279561	262064196	36	209		unspecified	ftp://ftp-private.ncbi.nlm.nih.gov/sra/sra-instant/reads/ByRun/sra/SRR/SRR349/SRR349740/SRR349740.sra	SRX099127	GSM802677: wildtype MIWI IP testes	RNA-Seq	size fractionation	TRANSCRIPTOMIC	SINGLE	0	ILLUMINA	Illumina Genome Analyzer II	SRP008495	GEO Series accession: GSE32435	0	147895	SRS265514		10090		Mus musculus	SRA046367	public	NO
SRR349927	2012-04-16 09:07:04	60783362	6078336200	100	3287		unspecified	ftp://ftp-private.ncbi.nlm.nih.gov/sra/sra-instant/reads/ByRun/sra/SRR/SRR349/SRR349927/SRR349927.sra	SRX099198	GSM800364: C1.12mth	RNA-Seq	cDNA	TRANSCRIPTOMIC	SINGLE	0	ILLUMINA	Illumina HiSeq 2000	SRP008508	GEO Series accession: GSE32302	0	154499	SRS265585		10090		Mus musculus	SRA046380	public	YES
SRR349928	2012-04-16 09:07:04	94215634	9421563400	100	6182		unspecified	ftp://ftp-private.ncbi.nlm.nih.gov/sra/sra-instant/reads/ByRun/sra/SRR/SRR349/SRR349928/SRR349928.sra	SRX099199	GSM800365: C2.12mth	RNA-Seq	cDNA	TRANSCRIPTOMIC	SINGLE	0	ILLUMINA	Illumina HiSeq 2000	SRP008508	GEO Series accession: GSE32302	0	154499	SRS265586		10090		Mus musculus	SRA046380	public	YES
SRR349929	2012-04-16 09:07:04	64069507	6406950700	100	3515		unspecified	ftp://ftp-private.ncbi.nlm.nih.gov/sra/sra-instant/reads/ByRun/sra/SRR/SRR349/SRR349929/SRR349929.sra	SRX099200	GSM800366: trePABPN1.A17.1.12mth	RNA-Seq	cDNA	TRANSCRIPTOMIC	SINGLE	0	ILLUMINA	Illumina HiSeq 2000	SRP008508	GEO Series accession: GSE32302	0	154499	SRS265587		10090		Mus musculus	SRA046380	public	YES
SRR349930	2012-04-16 09:07:04	83262950	8326295000	100	5438		unspecified	ftp://ftp-private.ncbi.nlm.nih.gov/sra/sra-instant/reads/ByRun/sra/SRR/SRR349/SRR349930/SRR349930.sra	SRX099201	GSM800367: trePABPN1.A17.2.12mth	RNA-Seq	cDNA	TRANSCRIPTOMIC	SINGLE	0	ILLUMINA	Illumina HiSeq 2000	SRP008508	GEO Series accession: GSE32302	0	154499	SRS265588		10090		Mus musculus	SRA046380	public	YES
SRR349931	2012-04-16 09:07:04	26564062	2443893704	92	1328		unspecified	ftp://ftp-private.ncbi.nlm.nih.gov/sra/sra-instant/reads/ByRun/sra/SRR/SRR349/SRR349931/SRR349931.sra	SRX099202	GSM800368: C1.20wks	RNA-Seq	cDNA	TRANSCRIPTOMIC	SINGLE	0	ILLUMINA	Illumina HiSeq 2000	SRP008508	GEO Series accession: GSE32302	0	154499	SRS265589		10090		Mus musculus	SRA046380	public	NO
SRR349932	2012-04-16 09:07:04	25446844	2341109648	92	1262		unspecified	ftp://ftp-private.ncbi.nlm.nih.gov/sra/sra-instant/reads/ByRun/sra/SRR/SRR349/SRR349932/SRR349932.sra	SRX099203	GSM800369: C2.20wks	RNA-Seq	cDNA	TRANSCRIPTOMIC	SINGLE	0	ILLUMINA	Illumina HiSeq 2000	SRP008508	GEO Series accession: GSE32302	0	154499	SRS265590		10090		Mus musculus	SRA046380	public	NO
SRR349933	2012-04-16 09:07:04	23574258	2168831736	92	1200		unspecified	ftp://ftp-private.ncbi.nlm.nih.gov/sra/sra-instant/reads/ByRun/sra/SRR/SRR349/SRR349933/SRR349933.sra	SRX099204	GSM800370: C3.20wks	RNA-Seq	cDNA	TRANSCRIPTOMIC	SINGLE	0	ILLUMINA	Illumina HiSeq 2000	SRP008508	GEO Series accession: GSE32302	0	154499	SRS265591		10090		Mus musculus	SRA046380	public	NO
SRR349934	2012-04-16 09:07:04	26613466	2448438872	92	1346		unspecified	ftp://ftp-private.ncbi.nlm.nih.gov/sra/sra-instant/reads/ByRun/sra/SRR/SRR349/SRR349934/SRR349934.sra	SRX099205	GSM800371: trePABPN1.A17.1.20wks	RNA-Seq	cDNA	TRANSCRIPTOMIC	SINGLE	0	ILLUMINA	Illumina HiSeq 2000	SRP008508	GEO Series accession: GSE32302	0	154499	SRS265592		10090		Mus musculus	SRA046380	public	NO
SRR349935	2012-04-16 09:07:04	25344109	2331658028	92	1211		unspecified	ftp://ftp-private.ncbi.nlm.nih.gov/sra/sra-instant/reads/ByRun/sra/SRR/SRR349/SRR349935/SRR349935.sra	SRX099206	GSM800372: trePABPN1.A17.2.20wks	RNA-Seq	cDNA	TRANSCRIPTOMIC	SINGLE	0	ILLUMINA	Illumina HiSeq 2000	SRP008508	GEO Series accession: GSE32302	0	154499	SRS265593		10090		Mus musculus	SRA046380	public	NO
SRR349936	2012-04-16 09:07:04	24321499	2237577908	92	1181		unspecified	ftp://ftp-private.ncbi.nlm.nih.gov/sra/sra-instant/reads/ByRun/sra/SRR/SRR349/SRR349936/SRR349936.sra	SRX099207	GSM800373: trePABPN1.A17.3.20wks	RNA-Seq	cDNA	TRANSCRIPTOMIC	SINGLE	0	ILLUMINA	Illumina HiSeq 2000	SRP008508	GEO Series accession: GSE32302	0	154499	SRS265594		10090		Mus musculus	SRA046380	public	NO
SRR040489	2010-05-14 09:59:23	8126152	292541472	36	310		unspecified	ftp://ftp-private.ncbi.nlm.nih.gov/sra/sra-instant/reads/ByRun/sra/SRR/SRR040/SRR040489/SRR040489.sra	SRX019621	GSM533912: E18.5 Ago2 catalytically inactive LIVER small RNA	RNA-Seq	size fractionation	TRANSCRIPTOMIC	SINGLE	0	ILLUMINA	Illumina Genome Analyzer II	SRP002375	GEO Series accession: GSE21370	20424607	126077	SRS065792		10090	Mus musculus	Mus musculus	SRA012598	public	NO
SRR052664	2010-07-01 09:29:01	7059117	254128212	36	269			ftp://ftp-private.ncbi.nlm.nih.gov/sra/sra-instant/reads/ByRun/sra/SRR/SRR052/SRR052664/SRR052664.sra	SRX021446	GSM546445: WT_ES_rep1	RNA-Seq	other	TRANSCRIPTOMIC	SINGLE	0	ILLUMINA	Illumina Genome Analyzer II	SRP002543	GEO Series accession: GSE21975	20620951	127179	SRS074162		10090	Mus musculus	Mus musculus	SRA019540	public	NO
SRR052665	2010-07-01 09:29:01	6911913	248828868	36	263			ftp://ftp-private.ncbi.nlm.nih.gov/sra/sra-instant/reads/ByRun/sra/SRR/SRR052/SRR052665/SRR052665.sra	SRX021447	GSM546446: WT_ES_rep2	RNA-Seq	other	TRANSCRIPTOMIC	SINGLE	0	ILLUMINA	Illumina Genome Analyzer II	SRP002543	GEO Series accession: GSE21975	20620951	127179	SRS074163		10090	Mus musculus	Mus musculus	SRA019540	public	NO
SRR052666	2010-07-01 09:29:01	6505667	234204012	36	248			ftp://ftp-private.ncbi.nlm.nih.gov/sra/sra-instant/reads/ByRun/sra/SRR/SRR052/SRR052666/SRR052666.sra	SRX021448	GSM546447: WT_ES_rep3	RNA-Seq	other	TRANSCRIPTOMIC	SINGLE	0	ILLUMINA	Illumina Genome Analyzer II	SRP002543	GEO Series accession: GSE21975	20620951	127179	SRS074164		10090	Mus musculus	Mus musculus	SRA019540	public	NO
[truncated: 222 more rows]
